# Supplementary material
Source: publisher figshare collection journal article supplement (https://gsajournals.figshare.com/ndownloader/files/21524742)
Supplement: Supplementary file 1 [file 21524742]

## Sheet: Table S4_LinkageMap
Table S4 SNP-based linkage map constructed from the RIL population derived from crossing SC112-14 with PI609251
Locus_name	Chr	Position	cM	RIL_SC112_002	RIL_SC112_003	RIL_SC112_004	RIL_SC112_006	RIL_SC112_008	RIL_SC112_009	RIL_SC112_010	RIL_SC112_011	RIL_SC112_013	RIL_SC112_014	RIL_SC112_015	RIL_SC112_016B	RIL_SC112_017	RIL_SC112_018	RIL_SC112_019	RIL_SC112_020	RIL_SC112_021	RIL_SC112_022	RIL_SC112_023	RIL_SC112_024	RIL_SC112_025	RIL_SC112_026	RIL_SC112_027	RIL_SC112_028	RIL_SC112_030	RIL_SC112_032	RIL_SC112_033	RIL_SC112_034	RIL_SC112_035	RIL_SC112_038	RIL_SC112_039	RIL_SC112_040	RIL_SC112_041	RIL_SC112_043	RIL_SC112_044	RIL_SC112_045	RIL_SC112_047	RIL_SC112_049	RIL_SC112_050	RIL_SC112_052	RIL_SC112_054	RIL_SC112_055	RIL_SC112_056	RIL_SC112_057	RIL_SC112_058	RIL_SC112_059
S1_1950	1	1950	0	B	A	A	A	B	A	B	-	A	-	A	A	-	A	A	A	A	A	-	B	A	A	A	B	B	B	A	B	B	B	A	A	B	B	B	A	B	A	A	A	A	A	B	B	A	A
S1_175396	1	175396	0	B	-	A	A	B	A	B	-	A	-	A	A	-	A	A	A	A	A	A	B	A	A	A	B	B	B	A	B	B	B	-	A	B	B	B	A	B	A	A	A	A	A	B	B	A	A
S1_261253	1	261253	0	B	A	A	A	B	A	B	-	A	-	A	A	-	A	A	A	A	A	A	B	A	A	A	B	B	B	A	B	B	B	A	A	-	B	B	A	B	A	A	A	A	A	B	B	A	A
S1_264648	1	264648	0	B	A	A	A	B	A	B	A	A	A	A	A	A	A	A	A	A	A	-	B	A	A	A	B	B	B	A	B	B	B	A	A	-	B	B	A	B	A	A	A	A	A	B	B	A	A
S1_587952	1	587952	0	B	-	A	A	B	A	B	-	A	-	A	A	-	A	A	A	A	A	B	B	A	A	A	B	B	B	A	B	B	B	A	A	B	B	B	A	B	A	A	A	A	A	B	B	A	A
S1_1209557	1	1209557	2.662	B	A	A	A	B	A	B	-	A	-	A	A	A	A	A	A	A	A	B	B	A	A	A	B	B	B	A	B	B	B	A	A	A	A	B	A	B	A	A	A	A	A	B	B	A	A
S1_1224031	1	1224031	2.662	B	A	A	A	B	A	B	A	A	-	A	A	A	A	A	A	A	A	B	B	A	A	A	B	B	B	A	B	B	B	A	A	A	A	B	A	B	A	A	A	A	A	B	B	A	A
S1_1224047	1	1224047	2.662	B	A	A	A	B	A	B	A	A	-	A	A	A	A	A	A	A	A	B	B	A	A	A	B	B	B	A	B	B	B	A	A	A	A	B	A	B	A	A	A	A	A	B	B	A	A
S1_1411814	1	1411814	4.209	B	A	-	A	B	A	B	A	A	-	A	A	A	A	A	A	A	A	B	B	A	A	A	B	B	B	A	B	B	B	A	A	A	A	B	A	B	A	A	A	A	A	B	B	A	A
S1_1629569	1	1629569	4.209	B	A	A	A	B	A	B	A	A	-	A	A	-	A	-	A	A	A	B	B	A	A	A	B	B	B	A	B	B	B	A	A	A	A	B	A	B	A	A	A	A	A	B	B	A	A
S1_1830483	1	1830483	4.209	B	A	A	A	B	A	B	A	A	-	A	A	-	A	-	A	A	A	B	B	A	A	A	B	B	B	A	B	B	B	A	A	A	A	B	A	B	A	A	A	A	A	B	B	A	A
S1_1448742	1	1448742	4.704	B	A	A	A	B	A	B	A	A	B	A	A	-	A	A	A	A	A	B	B	A	A	A	B	B	B	A	B	B	B	A	A	A	A	B	A	B	A	A	A	A	A	B	B	A	A
S1_1448773	1	1448773	4.704	B	A	A	A	B	A	B	A	A	-	A	A	-	A	A	A	A	A	B	B	A	A	A	B	B	B	A	B	B	B	A	A	A	A	B	A	B	A	A	A	A	A	B	B	A	A
S1_1449116	1	1449116	4.704	B	A	A	A	B	A	B	A	A	-	A	A	-	A	A	A	A	A	B	B	A	A	A	B	B	B	A	B	B	B	A	A	A	A	B	A	B	A	A	A	A	A	B	B	A	A
S1_1449125	1	1449125	4.704	B	A	A	A	B	A	B	A	A	-	A	A	-	A	A	A	A	A	B	B	A	A	A	B	B	B	A	B	B	B	A	A	A	A	B	A	B	A	A	A	A	A	B	B	A	A
S1_1449126	1	1449126	4.704	B	A	A	A	B	A	B	A	A	-	A	A	-	A	A	A	A	A	B	B	A	A	A	B	B	B	A	B	B	B	A	A	A	A	B	A	B	A	A	A	A	A	B	B	A	A
S1_2280068	1	2280068	7.231	B	A	A	A	A	A	B	B	A	B	A	A	-	A	-	A	A	A	B	B	A	A	A	B	B	B	A	B	B	B	B	A	A	A	B	A	B	A	A	A	A	A	B	B	A	A
S1_2280069	1	2280069	7.231	B	A	A	A	A	A	B	B	A	B	A	A	-	A	-	A	A	A	B	B	A	A	A	B	B	B	A	B	B	B	B	A	A	A	B	A	B	A	A	A	A	A	B	B	A	A
S1_2280070	1	2280070	7.231	B	A	A	A	A	A	B	B	A	B	A	A	-	A	-	A	A	A	B	B	A	A	A	B	B	B	A	B	B	B	B	A	A	A	B	A	B	A	A	A	A	A	B	B	A	A
S1_2280071	1	2280071	7.231	B	A	A	A	A	A	B	B	A	B	A	A	-	A	-	A	A	A	B	B	A	A	A	B	B	B	A	B	B	B	B	A	A	A	B	A	B	A	A	A	A	A	B	B	A	A
S1_2088905	1	2088905	7.731	B	A	A	A	A	A	B	B	A	A	A	A	-	A	-	A	A	A	B	-	A	A	A	B	B	B	A	B	B	B	B	A	A	A	B	A	B	A	A	A	A	A	B	B	A	A
S1_2311683	1	2311683	7.731	B	A	A	A	A	A	B	B	A	-	A	A	A	A	-	A	A	A	B	B	A	A	A	B	B	B	A	B	B	B	B	A	A	A	B	A	B	A	A	A	A	A	B	B	A	A
S1_2315596	1	2315596	7.731	B	A	A	A	A	A	B	B	A	-	A	A	A	A	-	A	A	A	B	B	A	A	A	B	B	B	A	B	B	B	B	A	A	A	B	A	B	A	A	A	A	A	B	B	A	A
S1_2354376	1	2354376	8.752	B	A	A	A	A	A	B	B	A	B	A	A	-	A	-	A	A	A	B	B	A	A	A	B	B	B	A	B	B	B	B	A	A	A	A	A	B	A	A	A	A	A	B	B	A	A
S1_2354377	1	2354377	8.752	B	A	A	A	A	A	B	B	A	B	A	A	-	A	-	A	A	A	B	B	A	A	A	B	B	B	A	B	B	B	B	A	A	A	A	A	B	A	A	A	A	A	B	B	A	A
S1_2584196	1	2584196	8.752	B	A	A	A	A	A	B	B	A	B	A	-	A	-	-	A	A	A	B	B	A	A	A	B	B	B	A	B	B	B	B	A	A	A	A	A	B	A	A	A	A	A	B	B	A	A
S1_3733444	1	3733444	12.482	B	A	A	A	A	B	B	B	A	B	B	A	B	A	-	A	A	A	B	B	A	A	A	B	B	B	A	B	B	B	B	A	A	A	A	A	B	A	B	A	B	A	B	B	A	A
S1_3733468	1	3733468	12.482	B	A	A	A	A	B	B	B	A	B	B	A	B	A	-	A	A	A	B	B	A	A	A	B	B	B	A	B	B	B	B	A	A	A	A	A	B	A	B	A	B	A	B	B	A	A
S1_3877986	1	3877986	12.482	B	A	A	A	A	B	B	B	A	B	B	A	-	A	-	A	A	A	B	B	A	A	A	B	B	B	A	B	B	B	B	A	A	A	A	A	B	A	B	A	B	A	B	B	A	A
S1_3721679	1	3721679	12.977	B	A	A	A	A	B	B	B	A	B	B	A	A	A	-	A	A	A	B	B	A	A	A	B	B	B	A	B	B	B	B	A	A	A	A	A	B	A	B	A	B	A	B	B	A	A
S1_3721700	1	3721700	12.977	B	A	A	A	A	B	B	B	A	B	B	A	A	A	-	A	A	A	B	B	A	A	A	B	B	B	A	B	B	B	B	A	A	A	A	A	B	A	B	A	B	A	B	B	A	A
S1_3728597	1	3728597	12.977	B	A	A	A	A	B	B	B	A	B	B	A	A	A	-	A	A	A	B	B	A	A	A	B	B	B	A	B	B	B	B	A	A	A	A	A	B	A	B	A	B	A	B	B	A	A
S1_3733600	1	3733600	12.977	B	A	A	A	A	-	B	B	A	B	B	A	A	A	-	A	A	A	B	B	A	A	A	B	B	B	A	B	B	B	B	A	A	A	A	A	B	A	B	A	B	A	B	B	A	A
S1_3733635	1	3733635	12.977	B	A	A	A	A	-	B	B	A	B	B	A	A	A	-	A	A	A	B	B	A	A	A	B	B	B	A	B	B	B	B	A	A	A	A	A	B	A	B	A	B	A	B	B	A	A
S1_3855610	1	3855610	12.977	B	A	A	A	A	-	B	B	A	B	B	A	A	A	-	A	A	A	B	B	A	A	A	B	B	B	A	B	B	B	B	A	A	A	A	A	B	A	B	A	B	A	B	B	A	A
S1_4048851	1	4048851	12.977	B	A	A	A	A	B	B	B	A	B	B	A	A	A	-	A	A	A	B	B	A	A	A	B	B	B	A	B	B	B	B	A	A	A	A	A	B	A	B	A	B	A	B	B	A	A
S1_4048854	1	4048854	12.977	B	A	A	A	A	B	B	B	A	B	B	A	A	A	-	A	A	A	B	B	A	A	A	B	B	B	A	B	B	B	B	A	A	A	A	A	B	A	B	A	B	A	B	B	A	A
S1_4582687	1	4582687	14.524	B	A	-	A	A	B	B	B	A	B	B	A	A	A	A	A	A	A	B	B	A	B	A	B	B	B	A	B	B	B	B	A	A	A	A	B	B	A	B	A	B	A	B	B	A	A
S1_4591455	1	4591455	14.524	B	A	A	A	A	B	B	B	A	B	B	A	-	A	A	A	A	A	B	B	A	-	A	-	B	B	A	B	B	B	B	A	A	A	A	B	B	A	B	A	B	A	B	B	A	A
S1_4591456	1	4591456	14.524	B	A	A	A	A	B	B	B	A	B	B	A	-	A	A	A	A	A	B	B	A	-	A	-	B	B	A	B	B	B	B	A	A	A	A	B	B	A	B	A	B	A	B	B	A	A
S1_4591457	1	4591457	14.524	B	A	A	A	A	B	B	B	A	B	B	A	-	A	A	A	A	A	B	B	A	-	A	-	B	B	A	B	B	B	B	A	A	A	A	B	B	A	B	A	B	A	B	B	A	A
S1_4591458	1	4591458	14.524	B	A	A	A	A	B	B	B	A	B	B	A	-	A	A	A	A	A	B	B	A	-	A	-	B	B	A	B	B	B	B	A	A	A	A	B	B	A	B	A	B	A	B	B	A	A
S1_4622958	1	4622958	14.524	B	A	A	A	A	-	B	B	A	B	B	A	-	A	A	A	A	A	B	B	A	-	A	B	B	B	A	B	B	B	B	A	A	A	A	B	B	A	B	A	B	A	B	B	A	A
S1_4660284	1	4660284	14.524	B	A	A	A	A	-	B	B	A	B	B	A	-	A	A	A	A	A	B	B	A	-	A	B	B	B	A	B	B	B	B	A	A	A	A	B	B	A	B	A	B	A	B	B	A	A
S1_5067303	1	5067303	14.524	B	A	A	A	A	-	B	B	A	B	B	A	A	A	A	A	A	A	B	B	A	B	A	B	B	B	A	B	B	B	B	A	A	A	A	B	B	A	B	A	B	A	B	B	A	A
S1_5605046	1	5605046	14.524	B	A	A	A	A	B	B	B	A	B	B	A	A	A	A	A	A	A	B	B	A	B	A	-	B	B	A	B	B	B	B	A	A	A	A	B	B	A	B	A	B	A	B	B	A	A
S1_4246649	1	4246649	15.524	B	A	A	A	A	B	B	B	A	B	B	A	A	A	A	A	A	A	B	B	A	A	A	B	B	B	A	B	B	B	B	A	A	A	A	A	B	A	B	A	B	A	B	B	A	A
S1_4067535	1	4067535	16.505	B	A	A	A	A	B	B	B	A	B	B	A	B	A	A	A	A	A	B	B	A	A	A	B	B	B	A	B	B	B	B	A	A	A	A	A	B	A	B	A	B	A	B	B	A	A
S1_4067555	1	4067555	16.505	B	A	A	A	A	B	B	B	A	B	B	A	B	A	A	A	A	A	B	B	A	A	A	B	B	B	A	B	B	B	B	A	A	A	A	A	B	A	B	A	B	A	B	B	A	A
S1_4067566	1	4067566	16.505	B	A	A	A	A	B	B	B	A	B	B	A	B	A	A	A	A	A	B	B	A	A	A	B	B	B	A	B	B	B	B	A	A	A	A	A	B	A	B	A	B	A	B	B	A	A
S1_5892166	1	5892166	18.568	B	A	A	A	A	B	B	B	A	B	B	A	B	A	B	A	A	A	B	B	A	-	A	-	B	B	A	B	B	B	B	A	A	A	A	B	B	A	B	A	A	A	B	B	A	A
S1_5896186	1	5896186	18.568	B	A	A	A	A	-	B	B	A	B	B	A	-	A	B	A	A	A	B	B	A	A	A	A	B	B	A	B	B	B	B	A	A	A	A	B	B	A	B	A	A	A	B	B	A	A
S1_5896187	1	5896187	18.568	B	A	A	A	A	-	B	B	A	B	B	A	-	A	B	A	A	A	B	B	A	A	A	A	B	B	A	B	B	B	B	A	A	A	A	B	B	A	B	A	A	A	B	B	A	A
S1_5896274	1	5896274	19.588	B	A	A	A	A	B	B	B	A	B	B	A	A	A	B	A	A	A	B	B	A	A	A	-	B	B	A	B	B	B	B	A	A	A	A	B	B	A	B	A	A	A	B	B	A	A
S1_5896289	1	5896289	19.588	B	A	A	A	A	B	B	B	A	B	B	A	A	A	B	A	A	A	B	B	A	A	A	-	B	B	A	B	B	B	B	A	A	A	A	B	B	A	B	A	A	A	B	B	A	A
S1_5896301	1	5896301	19.588	B	A	A	A	A	B	B	B	A	B	B	A	A	A	B	A	A	A	B	B	A	A	A	-	B	B	A	B	B	B	B	A	A	A	A	B	B	A	B	A	A	A	B	B	A	A
S1_5951704	1	5951704	22.279	B	A	A	A	A	B	B	B	A	B	B	A	A	A	B	A	A	A	B	B	A	-	A	B	A	A	A	B	B	B	B	A	A	A	A	B	B	A	B	A	A	A	B	B	A	A
S1_5951731	1	5951731	22.279	B	A	A	A	A	B	B	B	A	B	B	A	A	A	B	A	A	A	B	B	A	-	A	B	A	A	A	B	B	B	B	A	A	A	A	B	B	A	B	A	A	A	B	B	A	A
S1_6274090	1	6274090	22.279	B	A	A	A	A	B	B	B	A	B	B	A	A	A	B	A	A	A	B	B	A	-	A	-	A	A	A	B	B	B	B	A	A	A	A	B	B	A	B	A	A	A	B	B	A	A
S1_6320905	1	6320905	22.279	B	A	A	A	A	B	B	B	A	B	B	A	-	A	B	A	A	A	B	B	A	-	A	-	A	A	A	B	B	B	B	A	A	A	A	B	B	A	B	A	A	A	B	B	A	A
S1_6327994	1	6327994	22.279	B	A	A	A	A	B	B	B	A	B	B	A	A	A	B	A	A	A	B	B	A	A	A	-	A	A	A	B	B	B	B	A	A	A	A	B	B	A	B	A	A	A	B	B	A	A
S1_6378534	1	6378534	22.279	B	A	A	A	A	B	B	B	A	B	B	A	A	A	B	A	A	A	B	B	A	A	A	-	A	A	A	B	B	B	B	A	A	A	A	B	B	A	B	A	A	A	B	B	A	A
S1_6231017	1	6231017	22.805	B	A	A	A	A	-	B	B	A	B	B	A	A	A	B	A	A	A	B	B	A	-	A	-	A	A	A	B	B	B	B	A	A	A	A	B	B	A	B	A	A	A	B	B	A	A
S1_6335856	1	6335856	22.805	B	A	A	A	A	-	B	B	A	B	B	A	-	A	B	A	A	A	B	B	A	-	A	-	A	A	A	B	B	B	B	A	A	A	A	B	B	A	B	A	A	A	B	B	A	A
S1_6335866	1	6335866	22.805	B	A	A	A	A	B	B	B	A	B	B	A	B	A	B	A	A	A	B	B	A	-	A	A	A	A	A	B	B	B	B	A	A	A	A	B	B	A	B	A	A	A	B	B	A	A
S1_6335883	1	6335883	22.805	B	A	A	A	A	B	B	B	A	B	B	A	B	A	B	A	A	A	B	B	A	-	A	A	A	A	A	B	B	B	B	A	A	A	A	B	B	A	B	A	A	A	B	B	A	A
S1_6276941	1	6276941	23.321	B	A	A	A	A	B	B	B	A	B	B	-	A	A	B	A	A	A	B	B	A	A	A	A	A	A	A	B	B	B	B	A	A	A	A	B	B	-	B	A	A	A	B	B	A	A
S1_7317187	1	7317187	23.321	B	A	A	A	A	B	B	B	A	B	B	A	A	A	B	A	A	A	B	B	A	A	A	A	A	A	A	B	B	B	B	A	A	A	A	B	B	A	B	A	A	A	B	B	A	A
S1_7317188	1	7317188	23.321	B	A	A	A	A	B	B	B	A	B	B	A	A	A	B	A	A	A	B	B	A	A	A	A	A	A	A	B	B	B	B	A	A	A	A	B	B	A	B	A	A	A	B	B	A	A
S1_7317189	1	7317189	23.321	B	A	A	A	A	B	B	B	A	B	B	A	A	A	B	A	A	A	B	B	A	A	A	A	A	A	A	B	B	B	B	A	A	A	A	B	B	A	B	A	A	A	B	B	A	A
S1_8816782	1	8816782	26.586	B	A	A	A	A	B	B	B	A	B	B	A	A	-	B	A	A	A	B	B	A	-	A	A	A	A	A	B	B	B	B	B	A	A	A	B	B	A	-	A	A	A	B	B	A	A
S1_8973947	1	8973947	26.586	B	A	A	A	A	-	B	B	A	B	B	A	-	-	B	A	A	A	B	B	A	-	A	A	A	A	A	B	B	B	B	B	A	A	A	B	B	A	B	A	A	A	B	B	A	-
S1_8973948	1	8973948	26.586	B	A	A	A	A	-	B	B	A	B	B	A	-	-	B	A	A	A	B	B	A	-	A	A	A	A	A	B	B	B	B	B	A	A	A	B	B	A	B	A	A	A	B	B	A	-
S1_8973949	1	8973949	26.586	B	A	A	A	A	-	B	B	A	B	B	A	-	-	B	A	A	A	B	B	A	-	A	A	A	A	A	B	B	B	B	B	A	A	A	B	B	A	B	A	A	A	B	B	A	-
S1_8973950	1	8973950	26.586	B	A	A	A	A	-	B	B	A	B	B	A	-	-	B	A	A	A	B	B	A	-	A	A	A	A	A	B	B	B	B	B	A	A	A	B	B	A	B	A	A	A	B	B	A	-
S1_8973951	1	8973951	26.586	B	A	A	A	A	-	B	B	A	B	B	A	-	-	B	A	A	A	B	B	A	-	A	-	A	A	A	B	B	B	B	B	A	A	A	B	B	A	B	A	A	A	B	B	A	-
S1_8981449	1	8981449	26.586	B	A	A	A	A	B	B	B	A	B	B	A	A	-	B	A	A	A	B	B	A	-	A	A	A	A	A	B	B	B	B	B	A	A	A	B	B	A	B	A	A	A	B	B	A	A
S1_8984944	1	8984944	26.586	B	A	A	A	A	B	B	B	A	B	B	A	A	-	B	A	A	A	B	B	A	-	A	A	A	A	A	B	B	B	B	B	A	A	A	B	B	A	-	A	A	A	B	B	A	A
S1_8406318	1	8406318	27.102	B	A	A	A	A	-	B	B	A	B	B	A	A	-	B	A	A	A	B	B	A	-	A	A	A	A	A	B	B	B	B	B	A	A	A	B	B	A	-	A	A	A	B	B	A	-
S1_8502986	1	8502986	27.102	B	A	A	A	A	-	B	B	A	B	B	A	A	-	B	A	A	A	B	B	A	B	A	A	A	A	A	B	B	B	B	B	A	A	A	B	B	A	-	A	A	A	B	B	A	A
S1_8502990	1	8502990	27.102	B	A	A	A	A	-	B	B	A	B	B	A	A	-	B	A	A	A	B	B	A	B	A	A	A	A	A	B	B	B	B	B	A	A	A	B	B	A	-	A	A	A	B	B	A	A
S1_8502993	1	8502993	27.102	B	A	A	A	A	-	B	B	A	B	B	A	A	-	B	A	A	A	B	B	A	B	A	A	A	A	A	B	B	B	B	B	A	A	A	B	B	A	-	A	A	A	B	B	A	A
S1_8502996	1	8502996	27.102	B	A	A	A	A	-	B	B	A	B	B	A	A	-	B	A	A	A	B	B	A	B	A	A	A	A	A	B	B	B	B	B	A	A	A	B	B	A	-	A	A	A	B	B	A	A
S1_8918096	1	8918096	27.102	B	A	A	A	A	-	B	B	A	B	B	A	A	-	B	A	A	A	B	B	A	A	A	A	A	A	A	B	B	B	B	B	A	A	A	B	B	A	-	A	A	A	B	B	A	A
S1_9364825	1	9364825	28.201	B	A	A	A	A	B	B	B	A	B	B	-	-	A	B	A	A	A	B	B	A	-	A	A	A	A	A	B	B	B	B	B	A	A	A	B	B	A	-	A	A	A	B	B	A	-
S1_9366502	1	9366502	28.201	B	A	A	A	A	B	B	B	A	B	B	A	-	A	B	A	A	A	B	B	A	-	A	A	A	A	A	B	B	B	B	B	A	A	A	B	B	A	B	A	A	A	B	B	A	-
S1_9413224	1	9413224	28.201	B	A	A	A	A	-	B	B	A	B	B	A	A	-	B	A	A	A	B	B	A	A	A	A	A	A	A	B	B	B	B	B	A	A	A	B	B	A	B	A	A	A	B	B	A	-
S1_10081307	1	10081307	30.4	B	A	A	A	A	-	B	B	A	B	B	A	A	A	B	A	A	A	B	B	A	A	A	A	A	A	A	B	B	B	B	B	A	A	A	B	B	A	A	A	B	A	B	B	A	A
S1_10082063	1	10082063	30.4	B	A	A	A	A	-	B	B	A	B	B	A	-	A	B	A	A	A	B	B	A	A	A	A	A	A	A	B	B	B	B	B	A	A	A	B	B	A	-	A	B	A	B	B	A	A
S1_10082072	1	10082072	30.4	B	A	A	A	A	-	B	B	A	B	B	A	-	A	B	A	A	A	B	B	A	A	A	A	A	A	A	B	B	B	B	B	A	A	A	B	B	A	-	A	B	A	B	B	A	A
S1_9996512	1	9996512	30.921	B	A	A	A	A	B	B	B	A	B	B	A	-	-	B	A	A	A	B	B	A	A	A	-	A	A	A	B	B	-	B	B	A	A	A	B	B	A	-	-	B	A	B	B	A	A
S1_10029021	1	10029021	30.921	B	A	A	A	A	B	B	B	A	B	B	A	A	-	B	A	A	A	B	B	A	A	A	B	A	A	A	B	B	B	B	B	A	A	A	B	B	A	-	A	B	A	B	B	A	-
S1_10080147	1	10080147	30.921	B	A	A	A	A	B	B	B	A	B	B	A	-	B	B	A	A	A	B	B	A	A	A	-	A	A	A	B	B	B	B	B	A	A	A	B	B	A	A	A	B	A	B	B	A	A
S1_10080152	1	10080152	30.921	B	A	A	A	A	B	B	-	A	B	B	A	-	B	B	A	A	A	B	B	A	A	A	-	A	A	A	B	B	B	B	B	A	A	A	B	B	A	A	A	B	A	B	B	A	A
S1_9751933	1	9751933	31.447	B	A	A	A	A	-	B	B	A	B	B	A	A	-	B	A	A	A	B	B	A	A	A	-	A	A	A	B	B	B	B	B	A	A	A	B	B	A	-	A	B	A	B	B	A	A
S1_9751959	1	9751959	31.447	B	A	A	A	A	-	B	B	A	B	B	A	A	-	B	A	A	A	B	B	A	A	A	-	A	A	A	B	B	B	B	B	A	A	A	B	B	A	-	A	B	A	B	B	A	A
S1_9882581	1	9882581	31.447	B	A	A	A	A	B	B	B	A	B	B	A	A	-	B	A	A	A	B	B	A	A	A	-	A	A	A	B	B	B	B	B	A	A	A	B	B	A	A	A	B	A	B	B	A	-
S1_9962375	1	9962375	31.447	B	A	A	A	A	B	B	B	A	B	B	A	A	-	B	A	A	A	B	B	A	A	A	-	A	A	A	B	B	B	B	B	A	A	A	B	B	A	A	A	B	A	B	B	A	-
S1_9812012_B	1	9812012	31.979	B	A	A	A	A	-	B	B	A	B	B	A	-	-	B	A	A	A	B	B	A	A	A	-	A	A	A	B	B	B	B	B	A	A	A	B	B	A	-	A	B	A	B	B	A	B
S1_9813897_B	1	9813897	31.979	B	A	A	A	A	B	B	B	A	B	B	A	-	-	B	A	A	A	B	B	A	A	A	B	A	A	A	B	B	B	B	B	A	A	A	B	B	A	B	A	B	A	B	B	A	B
S1_9880776	1	9880776	31.979	B	A	A	A	A	B	B	B	A	B	B	A	-	-	B	A	A	A	B	B	A	A	A	-	A	A	A	B	B	B	B	B	A	A	A	B	B	A	-	A	B	A	B	B	A	-
S1_9570201	1	9570201	33.055	B	A	A	A	A	B	B	B	A	B	B	A	A	-	B	A	A	A	B	B	A	A	A	B	A	A	A	B	B	B	B	B	A	A	A	B	B	A	-	A	A	A	B	B	A	-
S1_9579252	1	9579252	33.055	B	A	A	A	A	-	B	B	A	B	B	A	A	B	B	A	A	A	B	B	A	A	A	-	A	A	A	B	B	B	B	B	A	A	A	B	B	A	A	A	A	A	B	B	A	A
S1_9579253	1	9579253	33.055	B	A	A	A	A	-	B	B	A	B	B	A	A	B	B	A	A	A	B	B	A	A	A	-	A	A	A	B	B	B	B	B	A	A	A	B	B	A	A	A	A	A	B	B	A	A
S1_9880689	1	9880689	34.142	B	A	A	A	A	-	B	B	A	B	B	A	A	A	B	A	A	A	B	B	A	A	A	A	A	A	A	B	B	B	B	B	A	A	A	B	B	A	A	A	B	A	B	B	A	-
S1_10096357	1	10096357	34.142	B	A	A	A	A	-	B	B	A	B	B	A	-	A	B	A	A	A	B	B	A	A	A	A	A	A	A	B	B	B	B	B	A	A	A	B	B	A	-	A	B	A	B	B	A	B
S1_10096675	1	10096675	34.142	B	A	A	A	A	B	B	B	A	B	B	A	-	-	B	A	A	A	B	B	A	A	A	-	A	A	A	B	B	B	B	B	A	A	A	B	B	A	-	A	B	A	B	B	A	-
S1_10121213	1	10121213	34.142	B	A	A	A	A	-	B	B	A	B	B	A	-	-	B	A	A	A	B	B	A	A	A	-	A	A	A	B	B	B	B	B	A	A	A	B	B	A	A	A	B	A	B	B	A	-
S1_11191687	1	11191687	37.443	B	A	A	A	A	B	B	A	A	B	B	A	A	-	B	A	A	A	-	B	A	A	A	A	A	A	A	B	B	B	B	B	A	A	A	B	B	A	A	A	B	A	B	B	A	-
S1_11195619	1	11195619	37.443	B	A	A	A	A	B	B	A	A	B	B	A	A	A	B	A	A	A	-	B	A	A	A	A	A	A	A	B	B	B	B	B	A	A	A	B	B	A	A	A	B	A	B	B	A	B
S1_11195673	1	11195673	37.443	B	A	A	A	A	B	B	A	A	B	B	A	A	-	B	A	A	A	-	B	A	A	A	A	A	A	A	B	B	B	B	B	A	A	A	B	B	A	A	A	B	A	B	B	A	-
S1_12087693_B	1	12087693	41.255	B	A	A	A	A	B	B	A	A	A	B	A	A	-	B	B	A	A	B	B	A	A	A	A	A	A	A	B	A	B	B	B	A	A	A	B	B	A	A	B	B	A	B	B	A	B
S1_12559707_B	1	12559707	41.255	B	A	A	A	A	B	B	A	A	A	B	A	-	-	B	B	A	A	-	B	A	A	A	-	A	A	A	B	A	B	B	B	A	A	A	B	B	A	A	B	B	A	B	B	A	B
S1_12662703	1	12662703	41.771	B	A	A	A	A	-	B	A	A	A	B	A	A	A	B	B	A	A	-	B	A	A	A	A	A	A	A	B	A	B	B	B	A	A	A	B	B	A	A	B	B	A	B	B	A	B
S1_12680942	1	12680942	41.771	B	A	A	A	A	-	B	A	A	A	B	A	-	-	B	B	A	A	-	B	A	A	A	A	A	A	A	B	A	B	B	B	A	A	A	B	B	A	A	B	B	A	B	B	A	B
S1_12680948	1	12680948	41.771	B	A	A	A	A	-	B	A	A	A	B	A	-	-	B	B	A	A	-	B	A	A	A	A	A	A	A	B	A	B	B	B	A	A	A	B	B	A	A	B	B	A	B	B	A	B
S1_11925539	1	11925539	42.846	B	A	A	A	A	-	B	A	A	A	B	A	A	-	B	B	A	A	A	B	A	A	A	A	A	A	A	B	A	B	B	B	A	A	A	B	B	A	A	B	B	A	B	B	A	-
S1_11925554	1	11925554	42.846	B	A	A	A	A	-	B	A	A	A	B	A	A	-	B	B	A	A	A	B	A	A	A	A	A	A	A	B	A	B	B	B	A	A	A	B	B	A	A	B	B	A	B	B	A	-
S1_12620102_B	1	12620102	43.372	B	A	A	A	A	B	B	A	A	A	B	A	-	-	B	B	A	A	A	B	A	A	A	-	A	A	A	B	A	B	B	B	A	A	A	B	B	A	A	B	B	A	B	B	A	B
S1_12921087_B	1	12921087	43.893	B	A	A	A	A	-	B	A	A	A	B	A	-	-	B	B	A	A	A	B	A	A	A	B	A	A	A	B	A	B	B	B	A	A	A	B	B	A	A	B	B	A	B	B	A	B
S1_12921125_B	1	12921125	43.893	B	A	A	A	A	-	B	A	A	A	B	A	-	-	B	B	A	A	A	B	A	A	A	B	A	A	A	B	A	B	B	B	A	A	A	B	B	A	A	B	B	A	B	B	A	B
S1_12070895_B	1	12070895	44.414	B	A	A	A	A	B	B	A	A	A	B	A	-	-	B	B	A	A	B	B	A	A	A	-	A	A	A	B	A	B	B	B	A	A	A	B	B	A	A	B	B	A	B	B	A	B
S1_12070901_B	1	12070901	44.414	B	A	A	A	A	B	B	A	A	A	B	A	-	-	B	B	A	A	B	B	A	A	A	-	A	A	A	B	A	B	B	B	A	A	A	B	B	A	A	B	B	A	B	B	A	B
S1_12197518_B	1	12197518	44.414	B	A	A	A	A	-	B	A	A	A	B	A	A	-	B	B	A	A	-	B	A	A	A	-	A	A	A	B	A	B	B	B	A	A	A	B	B	A	A	B	B	A	B	B	A	B
S1_12220845_B	1	12220845	44.414	B	A	A	A	A	-	B	A	A	A	B	A	-	A	B	B	A	A	-	B	A	A	A	B	A	A	A	B	A	B	B	B	A	A	A	B	B	A	A	B	B	A	B	B	A	B
S1_12220846_B	1	12220846	44.414	B	A	A	A	A	-	B	A	A	A	B	A	-	A	B	B	A	A	-	B	A	A	A	B	A	A	A	B	A	B	B	B	A	A	A	B	B	A	A	B	B	A	B	B	A	B
S1_12220847_B	1	12220847	44.414	B	A	A	A	A	-	B	A	A	A	B	A	-	A	B	B	A	A	-	B	A	A	A	B	A	A	A	B	A	B	B	B	A	A	A	B	B	A	A	B	B	A	B	B	A	B
S1_12220848_B	1	12220848	44.414	B	A	A	A	A	-	B	A	A	A	B	A	-	A	B	B	A	A	-	B	A	A	A	B	A	A	A	B	A	B	B	B	A	A	A	B	B	A	A	B	B	A	B	B	A	B
S1_12220849_B	1	12220849	44.414	B	A	A	A	A	-	B	A	A	A	B	A	-	A	B	B	A	A	-	B	A	A	A	B	A	A	A	B	A	B	B	B	A	A	A	B	B	A	A	B	B	A	B	B	A	B
S1_12220850_B	1	12220850	44.414	B	A	A	A	A	-	B	A	A	A	B	A	-	A	B	B	A	A	-	B	A	A	A	B	A	A	A	B	A	B	B	B	A	A	A	B	B	A	A	B	B	A	B	B	A	B
S1_12933620_B	1	12933620	45.467	B	A	A	A	A	B	B	A	A	A	B	A	A	-	B	B	A	A	A	B	A	A	A	A	A	A	A	B	A	B	B	B	A	A	A	B	B	A	A	B	B	A	B	B	A	B
S1_12933623	1	12933623	45.467	B	A	A	A	A	B	B	A	A	A	B	A	A	-	B	B	A	A	A	B	A	A	A	A	A	A	A	B	A	B	B	B	A	A	A	B	B	A	A	B	B	A	B	B	A	B
S1_12959276	1	12959276	45.467	B	A	A	A	A	-	B	A	A	A	B	A	-	A	B	B	A	A	A	B	A	A	A	A	A	A	A	B	A	B	B	B	A	A	A	B	B	A	A	B	B	A	B	B	A	B
S1_12959286	1	12959286	45.467	B	A	A	A	A	-	B	A	A	A	B	A	-	A	B	B	A	A	A	B	A	A	A	A	A	A	A	B	A	B	B	B	A	A	A	B	B	A	A	B	B	A	B	B	A	B
S1_12965848_B	1	12965848	45.467	B	A	A	A	A	-	B	A	A	A	B	A	A	-	B	B	A	A	-	B	A	A	A	A	A	A	A	B	A	B	B	B	A	A	A	B	B	A	A	B	B	A	B	B	A	B
S1_12968168_B	1	12968168	45.467	B	A	A	A	A	-	B	A	A	A	B	A	A	B	B	B	A	A	A	B	A	A	A	-	A	A	A	B	A	B	B	B	A	A	A	B	B	A	A	B	B	A	B	B	A	B
S1_12968198_B	1	12968198	45.467	B	A	A	A	A	-	B	A	A	A	B	A	A	B	B	B	A	A	A	B	A	A	A	-	A	A	A	B	A	B	B	B	A	A	A	B	B	A	A	B	B	A	B	B	A	B
S1_12968211_B	1	12968211	45.467	B	A	A	A	A	B	B	A	A	A	B	A	A	B	B	B	A	A	A	B	A	A	A	-	A	A	A	B	A	B	B	B	A	A	A	B	B	A	A	B	B	A	B	B	A	B
S1_13596483	1	13596483	52.659	B	A	A	A	A	B	B	A	A	A	B	A	A	A	A	B	A	A	B	A	A	A	A	-	A	A	A	A	A	B	B	B	A	A	A	B	B	A	A	A	B	A	B	B	A	B
S1_13780537	1	13780537	52.659	B	A	A	A	A	-	B	A	A	A	B	A	A	A	A	B	A	A	B	A	A	A	A	-	A	A	A	A	A	B	B	B	A	A	A	B	B	A	A	A	B	A	B	B	A	B
S1_13900276	1	13900276	52.659	B	A	A	A	A	B	B	A	A	A	B	A	A	A	A	B	A	A	B	A	A	A	A	-	A	A	A	A	A	B	B	B	A	A	A	B	B	A	A	A	B	A	B	B	A	B
S1_13900277	1	13900277	52.659	B	A	A	A	A	B	B	A	A	A	B	A	A	A	A	B	A	A	B	A	A	A	A	-	A	A	A	A	A	B	B	B	A	A	A	B	B	A	A	A	B	A	B	B	A	B
S1_13900278	1	13900278	52.659	B	A	A	A	A	B	B	A	A	A	B	A	A	A	A	B	A	A	B	A	A	A	A	-	A	A	A	A	A	B	B	B	A	A	A	B	B	A	A	A	B	A	B	B	A	B
S1_13900293	1	13900293	52.659	B	A	A	A	A	B	B	A	A	A	B	A	A	A	A	B	A	A	B	A	A	A	A	-	A	A	A	A	A	B	B	B	A	A	A	B	B	A	A	A	B	A	B	B	A	B
S1_14448857	1	14448857	55.96	B	A	A	A	A	B	B	A	A	A	B	A	A	A	A	B	A	A	B	A	A	A	A	-	A	A	A	A	B	B	B	B	A	A	A	B	B	A	A	A	B	B	B	B	A	B
S1_14448859	1	14448859	55.96	B	A	A	A	A	B	B	A	A	A	B	A	A	A	A	B	A	A	B	A	A	A	A	-	A	A	A	A	B	B	B	B	A	A	A	B	B	A	A	A	B	B	B	B	A	B
S1_14483592	1	14483592	55.96	B	A	A	A	A	-	B	A	A	A	B	A	A	A	A	B	A	A	B	A	A	A	A	-	A	A	A	A	B	B	B	B	A	A	A	B	B	A	A	A	B	B	B	B	A	B
S1_14662150_B	1	14662150	55.96	B	A	A	A	A	-	B	A	A	A	B	A	A	A	A	B	A	A	B	A	A	A	A	-	A	A	A	A	B	B	B	B	A	A	A	B	B	A	A	A	B	B	B	B	A	B
S1_14662153_B	1	14662153	55.96	B	A	A	A	A	-	B	A	A	A	B	A	A	A	A	B	A	A	B	A	A	A	A	-	A	A	A	A	B	B	B	B	A	A	A	B	B	A	A	A	B	B	B	B	A	B
S1_14649637	1	14649637	56.481	B	A	A	A	A	-	B	A	A	A	B	A	A	A	A	B	A	A	B	A	A	A	A	-	A	A	A	A	B	B	B	B	A	A	A	B	B	A	A	A	B	B	B	B	A	B
S1_14828789	1	14828789	56.481	B	A	A	A	A	-	B	A	A	A	B	A	A	A	A	B	A	A	B	A	A	A	A	-	A	A	A	A	B	B	B	B	A	A	A	B	B	A	A	A	B	B	B	B	A	B
S1_14889487	1	14889487	56.481	B	A	A	A	A	-	B	A	A	A	B	A	A	A	A	B	A	A	B	A	A	A	A	-	A	A	A	A	B	B	B	B	A	A	A	B	B	A	A	A	B	B	B	B	A	B
S1_14916956_B	1	14916956	56.481	B	A	A	A	A	-	B	A	A	A	B	A	A	A	A	B	A	A	B	A	A	A	A	B	A	A	A	A	B	B	B	B	A	A	A	B	B	A	A	A	B	B	B	B	A	B
S1_14979609	1	14979609	57.502	B	A	A	A	A	-	B	A	A	A	B	A	A	A	A	B	A	A	B	A	A	A	A	-	A	A	A	A	B	B	B	B	A	A	A	B	B	A	A	A	B	B	B	B	A	B
S1_14979614	1	14979614	57.502	B	A	A	A	A	-	B	A	A	A	B	A	A	A	A	B	A	A	B	A	A	A	A	-	A	A	A	A	B	B	B	B	A	A	A	B	B	A	A	A	B	B	B	B	A	B
S1_14979643	1	14979643	57.502	B	A	A	A	A	-	B	A	A	A	B	A	A	A	A	B	A	A	B	A	A	A	A	-	A	A	A	A	B	B	B	B	A	A	A	B	B	A	A	A	B	B	B	B	A	B
S1_15041539	1	15041539	57.502	B	A	A	A	A	A	B	A	A	A	B	A	A	A	A	B	A	A	B	A	A	A	A	B	A	A	A	A	B	B	B	B	A	A	A	B	B	A	A	A	B	B	B	B	A	B
S1_15160587	1	15160587	59.033	B	A	A	A	A	-	B	A	A	A	B	A	A	A	A	B	A	A	B	A	A	A	A	-	A	A	A	A	B	B	B	B	A	A	A	B	B	A	A	A	B	B	B	B	A	B
S1_15186134	1	15186134	59.033	B	A	A	A	A	-	B	A	A	A	B	A	A	A	A	B	A	A	B	A	A	A	A	A	A	A	A	A	B	B	B	B	A	A	A	B	B	A	A	A	B	B	B	B	A	B
S1_15186136	1	15186136	59.033	B	A	A	A	A	-	B	A	A	A	B	A	A	A	A	B	A	A	B	A	A	A	A	A	A	A	A	A	B	B	B	B	A	A	A	B	B	A	A	A	B	B	B	B	A	B
S1_15293301	1	15293301	60.58	B	A	A	A	A	-	B	A	A	A	B	A	A	A	A	B	A	A	B	A	A	A	A	-	A	A	A	A	B	B	B	B	A	A	A	B	B	A	A	A	B	B	B	B	A	B
S1_15302943	1	15302943	60.58	B	A	A	A	A	A	B	A	A	A	B	A	A	A	A	B	A	A	B	A	A	A	A	-	A	A	A	A	B	B	B	B	A	A	A	B	B	A	A	A	B	B	B	B	A	B
S1_15302951	1	15302951	60.58	B	A	A	A	A	A	B	A	A	A	B	A	A	A	A	B	A	A	B	A	A	A	A	-	A	A	A	A	B	B	B	B	A	A	A	B	B	A	A	A	B	B	B	B	A	B
S1_15732015	1	15732015	63.881	-	A	A	A	A	A	B	A	A	A	B	A	A	A	A	B	A	A	B	A	A	A	A	B	A	A	A	A	B	B	B	B	A	A	A	B	A	A	A	A	B	B	B	B	A	B
S1_15779111	1	15779111	64.391	-	A	A	A	A	A	B	A	A	A	B	A	A	A	A	B	A	A	B	A	A	A	A	A	A	A	A	A	B	B	B	B	A	A	A	B	A	A	A	A	B	B	B	B	A	B
S1_16798516	1	16798516	64.391	-	A	A	A	A	A	B	A	A	A	B	A	A	A	A	B	A	A	B	A	A	A	A	A	A	A	A	A	B	B	B	B	A	A	A	B	A	A	A	A	B	B	B	B	A	B
S1_15703768	1	15703768	64.882	-	A	A	A	A	A	B	A	A	A	B	A	A	A	A	B	A	A	B	A	A	A	A	B	A	A	A	A	B	B	B	B	A	A	A	B	A	A	A	A	B	B	B	B	A	B
S1_15703776	1	15703776	64.882	-	A	A	A	A	A	B	A	A	A	B	A	A	A	A	B	A	A	B	A	A	A	A	B	A	A	A	A	B	B	B	B	A	A	A	B	A	A	A	A	B	B	B	B	A	B
S1_15754219	1	15754219	64.882	-	A	A	A	A	A	B	A	A	A	B	A	A	A	A	B	A	A	B	A	A	A	A	B	A	A	A	A	B	B	B	B	A	A	A	B	A	A	A	A	B	B	B	B	A	B
S1_15754236	1	15754236	64.882	-	A	A	A	A	-	B	A	A	A	B	A	A	A	A	B	A	A	B	A	A	A	A	-	A	A	A	A	B	B	B	B	A	A	A	B	A	A	A	A	B	B	B	B	A	B
S1_15796770	1	15796770	64.882	-	A	A	A	A	A	B	A	A	A	B	A	A	A	A	B	A	A	B	A	A	A	A	-	A	A	A	A	B	B	B	B	A	A	A	B	A	A	A	A	B	B	B	B	A	B
S1_15796779	1	15796779	64.882	-	A	A	A	A	A	B	A	A	A	B	A	A	A	A	B	A	A	B	A	A	A	A	-	A	A	A	A	B	B	B	B	A	A	A	B	A	A	A	A	B	B	B	B	A	B
S1_16591904	1	16591904	64.882	-	A	A	A	A	A	B	A	A	A	B	A	A	A	A	B	A	A	B	A	A	A	A	-	A	A	A	A	B	B	B	B	A	A	A	B	A	A	A	A	B	B	B	B	A	B
S1_16591907	1	16591907	64.882	-	A	A	A	A	A	B	A	A	A	B	A	A	A	A	B	A	A	B	A	A	A	A	-	A	A	A	A	B	B	B	B	A	A	A	B	A	A	A	A	B	B	B	B	A	B
S1_16641334	1	16641334	64.882	-	A	A	A	A	A	B	A	A	A	B	A	A	A	A	B	A	A	B	A	A	A	A	-	A	A	A	A	B	B	B	B	A	A	A	B	A	A	A	A	B	B	B	B	A	B
S1_16669997	1	16669997	65.382	-	A	A	A	A	A	B	A	A	A	B	A	A	A	A	B	A	A	B	A	A	A	A	-	A	A	A	A	B	B	B	B	A	A	A	B	A	A	A	A	B	B	B	B	A	B
S1_16670003	1	16670003	65.382	-	A	A	A	A	A	B	A	A	A	B	A	A	A	A	B	A	A	B	A	A	A	A	-	A	A	A	A	B	B	B	B	A	A	A	B	A	A	A	A	B	B	B	B	A	B
S1_16732965	1	16732965	65.382	A	A	A	A	A	A	B	A	A	A	B	A	A	A	A	B	A	A	B	A	A	A	A	A	A	A	A	A	B	B	B	B	A	A	A	B	A	A	A	A	B	B	B	B	A	B
S1_16776829	1	16776829	65.382	-	A	A	A	A	A	B	A	A	A	B	A	A	A	A	B	A	A	B	A	A	A	A	-	A	A	A	A	B	B	B	B	A	A	A	B	A	A	A	A	B	B	B	B	A	B
S1_16798526	1	16798526	65.382	B	A	A	A	A	A	B	A	A	A	B	A	A	A	A	B	A	A	B	A	A	A	A	A	A	A	A	A	B	B	B	B	A	A	A	B	A	A	A	A	B	B	B	B	A	B
S1_16802952	1	16802952	65.382	-	A	A	A	A	A	B	A	A	A	B	A	A	A	A	B	A	A	B	A	A	A	A	A	A	A	A	A	B	B	B	B	A	A	A	B	A	A	A	A	B	B	B	B	A	B
S1_16802955	1	16802955	65.382	-	A	A	A	A	A	B	A	A	A	B	A	A	A	A	B	A	A	B	A	A	A	A	A	A	A	A	A	B	B	B	B	A	A	A	B	A	A	A	A	B	B	B	B	A	B
S1_17491403	1	17491403	65.382	-	A	A	A	A	A	B	A	A	A	B	A	A	A	A	B	A	A	B	A	A	A	A	A	A	A	A	A	B	B	B	B	A	A	A	B	A	A	A	A	B	B	B	B	A	B
S1_17685401	1	17685401	66.446	A	A	A	A	A	A	B	A	A	A	B	A	A	A	A	B	A	A	B	A	A	A	A	A	A	A	A	A	B	B	B	B	A	A	A	B	A	A	A	A	B	B	B	B	A	B
S1_17685439	1	17685439	66.446	A	A	A	A	A	A	B	A	A	A	B	A	A	A	A	B	A	A	B	A	A	A	A	A	A	A	A	A	B	B	B	B	A	A	A	B	A	A	A	A	B	B	B	B	A	B
S1_16440125	1	16440125	66.967	-	A	A	A	A	A	B	A	A	A	B	A	A	A	A	B	A	A	B	A	A	A	A	A	A	A	A	A	B	B	B	B	A	A	A	B	A	A	A	A	B	B	B	B	A	B
S1_16604672	1	16604672	66.967	-	A	A	A	A	A	B	A	A	A	B	A	A	A	A	B	A	A	B	A	A	A	A	-	A	A	A	A	B	B	B	B	A	A	A	B	A	A	A	A	B	B	B	B	A	B
S1_16604686	1	16604686	66.967	-	A	A	A	A	A	B	A	A	A	B	A	A	A	A	B	A	A	B	A	A	A	A	-	A	A	A	A	B	B	B	B	A	A	A	B	A	A	A	A	B	B	B	B	A	B
S1_17700486	1	17700486	66.967	-	A	A	A	A	A	B	A	A	A	B	A	A	A	A	B	A	A	B	A	A	A	A	-	A	A	A	A	B	B	B	B	A	A	A	B	A	A	A	A	B	B	B	B	A	B
S1_17723481	1	17723481	66.967	-	A	A	A	A	A	B	A	A	A	B	A	A	A	A	B	A	A	B	A	A	A	A	-	A	A	A	A	B	B	B	B	A	A	A	B	A	A	A	A	B	B	B	B	A	B
S1_17839456	1	17839456	68.598	-	A	A	A	A	A	B	A	A	A	B	A	A	A	A	B	A	A	B	A	A	A	A	-	A	A	A	A	B	B	B	B	A	A	A	B	A	B	A	A	B	B	B	B	A	B
S1_17845462	1	17845462	68.598	-	A	A	A	A	A	B	A	A	A	B	A	A	A	A	B	A	A	B	A	A	A	A	-	A	A	A	A	B	B	B	B	A	A	A	B	A	B	A	A	B	B	B	B	A	B
S1_17845472	1	17845472	68.598	-	A	A	A	A	A	B	A	A	A	B	A	A	A	A	B	A	A	B	A	A	A	A	-	A	A	A	A	B	B	B	B	A	A	A	B	A	B	A	A	B	B	B	B	A	B
S1_18055105	1	18055105	68.598	B	A	A	A	A	A	B	A	A	A	B	A	A	A	A	B	A	A	B	A	A	A	A	-	A	A	A	A	B	B	B	B	A	A	A	B	A	B	A	A	B	B	B	B	A	B
S1_18079291	1	18079291	69.118	-	A	A	A	A	A	B	A	A	A	B	A	A	A	A	B	A	A	B	A	A	A	A	B	A	A	A	A	B	B	B	B	A	A	A	B	A	B	A	A	B	B	B	B	A	B
S1_18079295	1	18079295	69.118	-	A	A	A	A	A	B	A	A	A	B	A	A	A	A	B	A	A	B	A	A	A	A	B	A	A	A	A	B	B	B	B	A	A	A	B	A	B	A	A	B	B	B	B	A	B
S1_18079296	1	18079296	69.118	-	A	A	A	A	A	B	A	A	A	B	A	A	A	A	B	A	A	B	A	A	A	A	B	A	A	A	A	B	B	B	B	A	A	A	B	A	B	A	A	B	B	B	B	A	B
S1_18079297	1	18079297	69.118	-	A	A	A	A	A	B	A	A	A	B	A	A	A	A	B	A	A	B	A	A	A	A	B	A	A	A	A	B	B	B	B	A	A	A	B	A	B	A	A	B	B	B	B	A	B
S1_18075406	1	18075406	70.109	-	A	A	A	A	A	B	A	A	A	B	A	A	A	A	B	A	A	B	A	A	A	A	A	A	A	A	A	B	B	B	B	A	A	A	B	A	B	A	A	B	B	B	B	A	B
S1_18075408	1	18075408	70.109	-	A	A	A	A	A	B	A	A	A	B	A	A	A	A	B	A	A	B	A	A	A	A	A	A	A	A	A	B	B	B	B	A	A	A	B	A	B	A	A	B	B	B	B	A	B
S1_18075409	1	18075409	70.109	-	A	A	A	A	A	B	A	A	A	B	A	A	A	A	B	A	A	B	A	A	A	A	A	A	A	A	A	B	B	B	B	A	A	A	B	A	B	A	A	B	B	B	B	A	B
S1_18075410	1	18075410	70.109	-	A	A	A	A	A	B	A	A	A	B	A	A	A	A	B	A	A	B	A	A	A	A	A	A	A	A	A	B	B	B	B	A	A	A	B	A	B	A	A	B	B	B	B	A	B
S1_18079340	1	18079340	70.109	-	A	A	A	A	A	B	A	A	A	B	A	A	A	A	B	A	A	B	A	A	A	A	A	A	A	A	A	B	B	B	B	A	A	A	B	A	B	A	A	B	B	B	B	A	B
S1_18079341	1	18079341	70.109	-	A	A	A	A	A	B	A	A	A	B	A	A	A	A	B	A	A	B	A	A	A	A	A	A	A	A	A	B	B	B	B	A	A	A	B	A	B	A	A	B	B	B	B	A	B
S1_18703673	1	18703673	71.161	-	A	A	A	A	B	B	A	A	A	B	A	A	A	A	B	A	A	B	A	A	A	A	-	A	A	A	A	B	B	B	B	A	A	A	A	A	B	A	A	B	B	B	B	A	B
S1_18709408	1	18709408	71.161	A	A	A	A	A	B	B	A	A	-	B	A	A	A	A	B	A	A	B	A	A	A	A	A	A	A	A	A	B	B	B	B	A	A	A	A	A	B	A	A	B	B	B	B	A	B
S1_18709409	1	18709409	71.161	A	A	A	A	A	B	B	A	A	-	B	A	A	A	A	B	A	A	B	A	A	A	A	A	A	A	A	A	B	B	B	B	A	A	A	A	A	B	A	A	B	B	B	B	A	B
S1_18853356	1	18853356	71.161	-	A	A	A	A	B	B	A	A	A	B	A	A	A	A	B	A	A	B	A	A	A	A	-	A	A	A	A	B	B	B	B	A	A	A	A	A	B	A	A	B	B	B	B	A	B
S1_18853396	1	18853396	71.161	-	A	A	A	A	B	B	A	A	A	B	A	A	A	A	B	A	A	B	A	A	A	A	-	A	A	A	A	B	B	B	B	A	A	A	A	A	B	A	A	B	B	B	B	A	B
S1_18845762	1	18845762	71.682	B	A	A	A	A	B	B	A	A	A	B	A	A	A	A	B	A	A	B	A	A	A	A	-	A	A	A	A	B	B	B	B	A	A	A	A	A	B	A	A	B	B	B	B	A	B
S1_18845763	1	18845763	71.682	B	A	A	A	A	B	B	A	A	A	B	A	A	A	A	B	A	A	B	A	A	A	A	-	A	A	A	A	B	B	B	B	A	A	A	A	A	B	A	A	B	B	B	B	A	B
S1_18845764	1	18845764	71.682	B	A	A	A	A	B	B	A	A	A	B	A	A	A	A	B	A	A	B	A	A	A	A	-	A	A	A	A	B	B	B	B	A	A	A	A	A	B	A	A	B	B	B	B	A	B
S1_19526116	1	19526116	73.811	B	A	A	A	A	B	B	A	A	A	B	A	A	A	A	B	A	A	B	A	A	A	A	A	A	A	A	A	B	B	B	B	A	A	A	A	A	B	A	A	B	B	B	B	A	B
S1_19681576	1	19681576	73.811	B	A	A	A	A	B	B	A	A	A	B	A	A	A	A	B	A	A	B	A	A	A	A	-	A	A	A	A	B	B	B	B	A	A	A	A	A	B	A	A	B	B	B	B	A	B
S1_20068184	1	20068184	73.811	B	A	A	A	A	-	B	A	A	A	B	A	A	A	A	B	A	A	B	A	A	A	A	A	A	A	A	A	B	B	B	B	A	A	A	A	A	B	A	A	B	B	B	B	A	B
S1_20068185	1	20068185	73.811	B	A	A	A	A	-	B	A	A	A	B	A	A	A	A	B	A	A	B	A	A	A	A	A	A	A	A	A	B	B	B	B	A	A	A	A	A	B	A	A	B	B	B	B	A	B
S1_20068186	1	20068186	73.811	B	A	A	A	A	-	B	A	A	A	B	A	A	A	A	B	A	A	B	A	A	A	A	A	A	A	A	A	B	B	B	B	A	A	A	A	A	B	A	A	B	B	B	B	A	B
S1_20068187	1	20068187	73.811	B	A	A	A	A	-	B	A	A	A	B	A	A	A	A	B	A	A	B	A	A	A	A	A	A	A	A	A	B	B	B	B	A	A	A	A	A	B	A	A	B	B	B	B	A	B
S1_19486592	1	19486592	74.853	B	A	A	A	A	B	B	A	A	A	B	A	A	A	A	B	A	A	B	A	A	A	A	-	A	A	A	A	B	B	B	B	A	A	A	A	A	B	A	A	B	B	B	B	A	B
S1_19716118	1	19716118	74.853	B	A	A	A	A	B	B	A	A	A	B	A	A	A	A	B	A	A	B	A	A	A	A	A	A	A	A	A	B	-	B	B	A	A	A	A	A	B	A	A	B	B	B	B	A	B
S1_20057931	1	20057931	74.853	B	A	A	A	A	-	B	A	A	A	B	A	A	A	A	B	A	A	B	A	A	A	A	-	A	A	A	A	B	B	B	B	A	A	A	A	A	B	A	A	B	B	B	B	A	B
S1_19480868	1	19480868	75.363	B	A	A	A	A	B	B	A	A	A	B	A	A	A	A	B	A	A	B	A	A	A	A	A	A	A	A	A	B	B	B	B	A	A	A	A	A	B	A	A	B	B	B	B	A	B
S1_20178900	1	20178900	75.363	B	A	A	A	A	B	B	A	A	A	B	A	A	A	A	B	A	A	B	-	A	A	A	-	A	A	A	A	B	B	B	B	A	A	A	A	A	B	A	A	B	B	B	B	A	B
S1_20200281	1	20200281	75.363	B	A	A	A	A	-	B	A	A	A	B	A	A	A	A	B	A	A	B	A	A	A	A	-	A	A	A	A	B	B	B	B	A	A	A	A	A	B	A	A	B	B	B	B	A	B
S1_19695642	1	19695642	75.868	B	A	A	A	A	B	B	A	A	A	B	A	A	A	A	B	A	A	B	A	A	A	A	-	A	A	A	A	B	B	B	B	A	A	A	A	A	B	A	A	B	B	B	B	A	B
S1_20198541	1	20198541	76.379	B	A	A	A	A	-	B	A	A	A	B	A	A	A	A	B	A	A	B	A	A	A	A	B	A	A	A	A	B	B	B	B	A	A	A	A	A	B	A	A	B	B	B	B	A	B
S1_20255804	1	20255804	76.379	B	A	A	A	-	A	B	A	A	A	B	A	A	A	A	B	A	A	B	A	A	A	A	-	A	A	A	A	B	B	B	B	A	A	A	A	A	B	A	A	B	B	B	B	A	B
S1_20169486	1	20169486	77.389	B	A	A	A	A	A	B	A	A	A	B	A	A	A	A	B	A	A	B	A	A	A	A	A	A	A	A	A	B	B	B	B	A	A	A	A	A	B	A	A	B	B	B	B	A	B
S1_20703394	1	20703394	77.889	B	A	A	A	A	A	B	A	A	A	B	A	A	A	A	B	A	A	B	A	A	A	A	A	A	A	A	A	B	B	B	B	A	A	A	A	A	B	A	A	B	B	B	B	A	B
S1_21335620	1	21335620	79.952	B	A	A	A	B	-	B	A	A	A	B	A	A	A	A	B	A	A	B	A	A	A	A	B	A	A	A	A	B	B	B	B	A	A	A	A	A	B	A	A	B	B	B	B	A	B
S1_21335621	1	21335621	79.952	B	A	A	A	B	-	B	A	A	A	B	A	A	A	A	B	A	A	B	A	A	A	A	B	A	A	A	A	B	B	B	B	A	A	A	A	A	B	A	A	B	B	B	B	A	B
S1_21488996	1	21488996	79.952	B	A	A	A	B	-	B	A	A	A	B	A	A	A	A	B	A	A	B	A	A	A	A	B	A	A	A	A	B	-	B	B	A	A	A	A	A	B	A	A	B	B	B	B	A	B
S1_21488999	1	21488999	79.952	B	A	A	A	B	-	B	A	A	A	B	A	A	A	A	B	A	A	B	A	A	A	A	B	A	A	A	A	B	-	B	B	A	A	A	A	A	B	A	A	B	B	B	B	A	B
S1_21488797	1	21488797	81.531	B	A	A	A	-	A	B	A	A	A	B	A	A	A	A	B	A	A	B	A	A	A	A	-	A	A	A	A	B	B	B	B	A	A	A	A	A	-	A	A	B	B	B	B	A	B
S1_21488798	1	21488798	81.531	B	A	A	A	-	A	B	A	A	A	B	A	A	A	A	B	A	A	B	A	A	A	A	-	A	A	A	A	B	B	B	B	A	A	A	A	A	-	A	A	B	B	B	B	A	B
S1_21488799	1	21488799	81.531	B	A	A	A	-	A	B	A	A	A	B	A	A	A	A	B	A	A	B	A	A	A	A	-	A	A	A	A	B	B	B	B	A	A	A	A	A	-	A	A	B	B	B	B	A	B
S1_21035353	1	21035353	82.047	B	A	A	A	-	-	B	A	A	A	B	A	A	A	A	B	A	A	B	A	A	A	A	A	A	A	A	A	B	B	B	B	A	A	A	A	A	B	A	A	B	B	B	B	A	B
S1_21489342	1	21489342	82.047	B	A	A	A	-	-	B	A	A	A	B	A	A	A	A	B	A	A	B	A	A	A	A	-	A	A	A	A	B	-	B	B	A	A	A	A	A	B	A	A	B	B	B	B	A	B
S1_21489343	1	21489343	82.047	B	A	A	A	-	-	B	A	A	A	B	A	A	A	A	B	A	A	B	A	A	A	A	-	A	A	A	A	B	-	B	B	A	A	A	A	A	B	A	A	B	B	B	B	A	B
S1_21489344	1	21489344	82.047	B	A	A	A	-	-	B	A	A	A	B	A	A	A	A	B	A	A	B	A	A	A	A	-	A	A	A	A	B	-	B	B	A	A	A	A	A	B	A	A	B	B	B	B	A	B
S1_26887718	1	26887718	84.199	B	A	B	B	-	-	B	A	A	-	A	A	A	A	A	B	A	A	B	A	A	A	A	-	A	A	A	A	B	B	B	B	A	A	A	A	-	B	A	A	B	B	B	B	A	B
S1_50929540	1	50929540	84.199	B	A	B	B	A	-	B	A	A	-	A	A	A	A	A	B	A	A	B	A	A	A	A	A	A	A	A	A	B	B	B	B	A	A	A	A	-	B	A	A	B	B	B	B	A	B
S1_50929541	1	50929541	84.199	B	A	B	B	A	-	B	A	A	-	A	A	A	A	A	B	A	A	B	A	A	A	A	A	A	A	A	A	B	B	B	B	A	A	A	A	-	B	A	A	B	B	B	B	A	B
S1_51016126	1	51016126	84.199	B	A	B	B	A	B	B	A	A	A	A	A	A	A	A	B	A	A	B	A	A	A	A	A	A	A	A	A	B	B	B	B	A	A	A	A	A	B	A	A	B	B	B	B	A	B
S1_52802421	1	52802421	84.731	B	A	B	B	-	A	B	A	A	B	A	A	A	A	A	B	A	A	B	A	A	A	A	-	A	A	A	A	B	B	B	B	A	A	A	A	B	B	A	A	A	B	B	B	A	B
S1_53600806	1	53600806	84.731	B	A	B	B	-	-	B	A	A	B	A	A	A	A	A	B	A	A	B	A	A	A	A	-	A	A	A	A	B	B	B	B	A	A	A	A	-	B	A	A	A	B	B	B	A	B
S1_53934727	1	53934727	84.731	B	A	B	B	A	-	B	A	A	-	A	A	A	A	A	B	A	A	B	A	A	A	A	-	A	A	A	A	B	B	B	B	A	A	A	A	-	B	A	A	A	B	B	B	A	B
S1_53934733	1	53934733	84.731	B	A	B	B	A	-	B	A	A	-	A	A	A	A	A	B	A	A	B	A	A	A	A	-	A	A	A	A	B	B	B	B	A	A	A	A	-	B	A	A	A	B	B	B	A	B
S1_46547219_B	1	46547219	85.251	B	A	B	B	-	-	B	A	A	B	A	A	A	A	A	B	A	A	B	A	A	A	A	-	A	A	A	A	B	B	B	B	A	A	A	A	-	B	A	A	B	B	B	B	A	B
S1_48286785	1	48286785	85.251	B	A	B	B	A	-	B	A	A	-	A	A	A	A	A	B	A	A	B	A	A	A	A	A	A	A	A	A	B	B	B	B	A	A	A	A	A	B	A	A	B	B	B	B	A	B
S1_48855666_B	1	48855666	85.251	B	A	B	B	-	-	B	A	A	-	A	A	A	A	A	B	A	A	B	A	A	A	A	-	A	A	A	A	B	B	B	B	A	A	A	A	-	B	A	A	B	B	B	B	A	B
S1_48989266_B	1	48989266	85.251	B	A	B	B	-	B	B	A	A	A	A	A	A	A	A	B	A	A	B	A	A	A	A	B	A	A	A	A	B	B	B	B	A	A	A	A	B	B	A	A	B	B	B	B	A	B
S1_48989267_B	1	48989267	85.251	B	A	B	B	-	B	B	A	A	A	A	A	A	A	A	B	A	A	B	A	A	A	A	B	A	A	A	A	B	B	B	B	A	A	A	A	B	B	A	A	B	B	B	B	A	B
S1_26887496_B	1	26887496	85.767	B	A	B	B	-	B	B	A	A	-	A	A	A	A	A	B	A	A	B	A	A	A	A	B	A	A	A	A	B	B	B	B	A	A	A	A	-	B	A	A	B	B	B	B	A	B
S1_26887534_B	1	26887534	85.767	B	A	B	B	-	B	B	A	A	-	A	A	A	A	A	B	A	A	B	A	A	A	A	B	A	A	A	A	B	B	B	B	A	A	A	A	-	B	A	A	B	B	B	B	A	B
S1_26887536_B	1	26887536	85.767	B	A	B	B	-	B	B	A	A	-	A	A	A	A	A	B	A	A	B	A	A	A	A	B	A	A	A	A	B	B	B	B	A	A	A	A	-	B	A	A	B	B	B	B	A	B
S1_27000700_B	1	27000700	85.767	B	A	B	B	B	-	B	A	A	B	A	A	A	A	A	B	A	A	B	A	A	A	A	-	A	A	A	A	B	B	B	B	A	A	A	A	B	B	A	A	B	B	B	B	A	B
S1_27000701_B	1	27000701	85.767	B	A	B	B	B	-	B	A	A	B	A	A	A	A	A	B	A	A	B	A	A	A	A	-	A	A	A	A	B	B	B	B	A	A	A	A	B	B	A	A	B	B	B	B	A	B
S1_27000703_B	1	27000703	85.767	B	A	B	B	B	-	B	A	A	B	A	A	A	A	A	B	A	A	B	A	A	A	A	-	A	A	A	A	B	B	B	B	A	A	A	A	B	B	A	A	B	B	B	B	A	B
S1_27000704_B	1	27000704	85.767	B	A	B	B	B	-	B	A	A	B	A	A	A	A	A	B	A	A	B	A	A	A	A	-	A	A	A	A	B	B	B	B	A	A	A	A	B	B	A	A	B	B	B	B	A	B
S1_29435274_B	1	29435274	85.767	B	A	B	B	A	-	B	A	A	-	A	A	A	A	A	B	A	A	B	A	A	A	A	B	A	A	A	A	B	B	B	B	A	A	A	A	-	B	A	A	B	B	B	B	A	B
S1_29435276_B	1	29435276	85.767	B	A	B	B	A	-	B	A	A	-	A	A	A	A	A	B	A	A	B	A	A	A	A	B	A	A	A	A	B	B	B	B	A	A	A	A	-	B	A	A	B	B	B	B	A	B
S1_30825621_B	1	30825621	85.767	B	A	B	B	-	-	B	A	A	B	A	A	A	A	A	B	A	A	B	A	A	A	A	B	A	A	A	A	B	B	B	B	A	A	A	A	-	B	A	A	B	B	B	B	A	B
S1_48382377_B	1	48382377	85.767	B	A	B	B	A	-	B	A	A	-	A	A	A	A	A	B	A	A	B	A	A	A	A	B	A	A	A	A	B	B	B	B	A	A	A	A	B	B	A	A	B	B	B	B	A	B
S1_25930397_B	1	25930397	86.288	B	A	B	B	-	-	B	A	A	B	A	A	A	A	A	B	A	A	B	A	A	A	A	-	A	A	A	A	B	B	B	B	A	A	A	A	-	B	A	A	B	B	B	B	A	B
S1_30511445_B	1	30511445	86.288	B	A	B	B	-	B	B	A	A	B	A	A	A	A	A	B	A	A	B	A	A	A	A	-	A	A	A	A	B	B	B	B	A	A	A	A	-	B	A	A	B	B	B	B	A	B
S1_47431073_B	1	47431073	86.288	B	A	B	B	A	-	B	A	A	-	A	A	A	A	A	B	A	A	B	A	A	A	A	B	A	A	A	A	B	B	B	B	A	A	A	A	-	B	A	A	B	B	B	B	A	B
S1_49739871_B	1	49739871	86.288	B	A	B	B	-	A	B	A	A	-	A	A	A	A	A	B	A	A	B	A	A	A	A	-	A	A	A	A	B	B	B	B	A	A	A	A	-	B	A	A	B	B	B	B	A	B
S1_50197989_B	1	50197989	86.288	B	A	B	B	-	-	B	A	A	-	A	A	A	A	A	B	A	A	B	A	A	A	A	-	A	A	A	A	B	B	B	B	A	A	A	A	B	B	A	A	B	B	B	B	A	B
S1_26484206_B	1	26484206	86.809	B	A	B	B	B	A	B	A	A	B	A	A	A	A	A	B	A	A	B	A	A	A	A	-	A	A	A	A	B	B	B	B	A	A	A	A	B	B	A	A	B	B	B	B	A	B
S1_30132131_B	1	30132131	86.809	B	A	B	B	-	-	B	A	A	-	A	A	A	A	A	B	A	A	B	A	A	A	A	-	A	A	A	A	B	B	B	B	A	A	A	A	-	B	A	A	B	B	B	B	A	B
S1_31011978_B	1	31011978	86.809	B	A	B	B	-	-	B	A	A	-	A	A	A	A	A	B	A	A	B	A	A	A	A	A	A	A	A	A	B	B	B	B	A	A	A	A	-	B	A	A	B	B	B	B	A	B
S1_35053620_B	1	35053620	86.809	B	A	B	B	B	-	B	A	A	-	A	A	A	A	A	B	A	A	B	A	A	A	A	-	A	A	A	A	B	B	B	B	A	A	A	A	B	B	A	A	B	B	B	B	A	B
S1_39107979_B	1	39107979	86.809	B	A	B	B	-	A	B	A	A	A	A	A	A	A	A	B	A	A	B	A	A	A	A	A	A	A	A	A	B	B	B	B	A	A	A	A	-	B	A	A	B	B	B	B	A	B
S1_31171975	1	31171975	87.319	B	A	B	B	-	-	B	A	A	-	A	A	A	A	A	B	A	A	B	A	A	A	A	-	A	A	A	A	B	B	B	B	A	A	A	A	-	B	A	A	B	B	B	B	A	B
S1_31441486	1	31441486	87.319	B	A	B	B	-	A	B	A	A	-	A	A	A	A	A	B	A	A	B	A	A	A	A	A	A	A	A	A	B	B	B	-	A	A	A	A	-	B	A	A	B	B	B	B	A	B
S1_31441523	1	31441523	87.319	B	A	B	B	A	A	B	A	A	A	A	A	A	A	A	B	A	A	B	A	A	A	A	A	A	A	A	A	B	B	B	B	A	A	A	A	-	B	A	A	B	B	B	B	A	B
S1_34336114_B	1	34336114	87.319	B	A	B	B	-	A	B	A	A	-	A	A	A	A	A	B	A	A	B	A	A	A	A	-	A	A	A	A	B	B	B	B	A	A	A	A	-	B	A	A	B	B	B	B	A	B
S1_46548083_B	1	46548083	87.319	B	A	B	B	A	-	B	A	A	-	A	A	A	A	A	B	A	A	B	A	A	A	A	-	A	A	A	A	B	B	B	B	A	A	A	A	B	B	A	A	B	B	B	B	A	B
S1_46548109_B	1	46548109	87.319	B	A	B	B	A	-	B	A	A	-	A	A	A	A	A	B	A	A	B	A	A	A	A	-	A	A	A	A	B	B	B	B	A	A	A	A	B	B	A	A	B	B	B	B	A	B
S1_49363759_B	1	49363759	87.319	B	A	B	B	A	A	B	A	A	A	A	A	A	A	A	B	A	A	B	A	A	A	A	A	A	A	A	A	B	B	B	B	A	A	A	A	B	B	A	A	B	B	B	B	A	B
S1_49433273_B	1	49433273	87.319	B	A	B	B	-	-	B	A	A	A	A	A	A	A	A	B	A	A	B	A	A	A	A	A	A	A	A	A	B	B	B	B	A	A	A	A	-	B	A	A	B	B	B	B	A	B
S1_26252330_B	1	26252330	87.814	B	A	B	B	B	-	B	A	A	A	A	A	A	A	A	B	A	A	B	A	A	A	A	-	A	A	A	A	B	B	B	B	A	A	A	A	-	B	A	A	B	B	B	B	A	B
S1_26252356_B	1	26252356	87.814	B	A	B	B	B	-	B	A	A	A	A	A	A	A	A	B	A	A	B	A	A	A	A	-	A	A	A	A	B	B	B	B	A	A	A	A	-	B	A	A	B	B	B	B	A	B
S1_26252357_B	1	26252357	87.814	B	A	B	B	B	-	B	A	A	A	A	A	A	A	A	B	A	A	B	A	A	A	A	-	A	A	A	A	B	B	B	B	A	A	A	A	-	B	A	A	B	B	B	B	A	B
S1_49036439_B	1	49036439	88.324	B	A	B	B	B	-	B	A	A	-	A	A	A	A	A	B	A	A	B	A	A	A	A	B	A	A	A	A	B	B	B	B	A	A	A	A	-	B	A	A	B	B	B	B	A	B
S1_49427766_B	1	49427766	88.829	B	A	B	B	B	-	B	A	A	-	A	A	A	A	A	B	A	A	B	A	A	A	A	-	A	A	A	A	B	B	B	B	A	A	A	A	-	B	A	A	B	B	B	B	A	B
S1_51525808	1	51525808	89.356	B	A	B	B	-	-	B	A	-	-	A	A	A	A	A	B	A	A	B	A	A	A	A	A	A	A	A	A	B	B	B	B	A	A	A	A	B	B	A	A	A	B	B	B	A	B
S1_51860543	1	51860543	89.356	B	A	B	B	B	-	B	A	A	-	A	A	A	A	A	B	A	A	B	A	A	A	A	A	A	A	A	A	B	B	B	B	A	A	A	A	B	B	A	A	A	B	B	B	A	B
S1_51860544_B	1	51860544	89.356	B	A	B	B	B	-	B	A	A	-	A	A	A	A	A	B	A	A	B	A	A	A	A	A	A	A	A	A	B	B	B	B	A	A	A	A	B	B	A	A	A	B	B	B	A	B
S1_51860558_B	1	51860558	89.356	B	A	B	B	B	-	B	A	A	-	A	A	A	A	A	B	A	A	B	A	A	A	A	A	A	A	A	A	B	B	B	B	A	A	A	A	B	B	A	A	A	B	B	B	A	B
S1_52230640_B	1	52230640	89.871	B	A	B	B	B	A	B	A	A	-	A	A	A	A	A	B	A	A	B	A	A	A	A	A	A	A	A	A	B	B	B	B	A	A	A	A	-	B	A	A	A	B	B	B	A	B
S1_52350780_B	1	52350780	89.871	B	A	B	B	B	A	B	A	A	-	A	A	A	A	A	B	A	A	B	A	A	A	A	-	A	A	A	A	B	B	B	B	A	A	A	A	-	B	A	A	A	B	B	B	A	B
S1_52802931	1	52802931	89.871	B	A	B	B	-	-	B	A	A	-	A	A	A	A	A	B	A	A	B	A	A	A	A	A	A	A	A	A	B	B	B	B	A	A	A	A	B	B	A	A	A	B	B	B	A	B
S1_53469820_B	1	53469820	89.871	B	A	B	B	B	-	B	A	A	-	A	A	A	A	A	B	A	A	B	A	A	A	A	-	A	A	A	A	B	B	B	B	A	A	A	A	B	B	A	A	A	B	B	B	A	B
S1_53936332_B	1	53936332	89.871	B	A	B	B	B	-	B	A	A	-	A	A	A	A	A	B	A	A	B	A	A	A	A	A	A	A	A	A	B	B	B	B	A	A	A	A	B	B	A	A	A	B	B	B	A	B
S1_54139890	1	54139890	89.871	B	A	B	B	A	A	B	A	A	B	A	A	A	A	A	B	A	A	B	A	A	A	A	A	A	A	A	A	B	B	B	B	A	A	A	A	B	B	A	A	A	B	B	B	A	B
S1_54194016_B	1	54194016	90.924	B	A	B	B	B	-	B	A	A	-	A	A	A	A	A	B	A	A	B	A	A	A	A	-	A	A	A	A	B	B	B	B	A	A	A	A	-	B	A	A	A	B	B	B	A	B
S1_54194018_B	1	54194018	90.924	B	A	B	B	B	-	B	A	A	-	A	A	A	A	A	B	A	A	B	A	A	A	A	-	A	A	A	A	B	B	B	B	A	A	A	A	-	B	A	A	A	B	B	B	A	B
S1_54194053_B	1	54194053	90.924	B	A	B	B	B	-	B	A	A	-	A	A	A	A	A	B	A	A	B	A	A	A	A	-	A	A	A	A	B	B	B	B	A	A	A	A	-	B	A	A	A	B	B	B	A	B
S1_53944144_B	1	53944144	91.434	B	A	B	B	B	-	B	A	A	-	A	A	A	A	A	B	A	A	B	A	A	A	A	B	A	A	A	A	B	B	B	B	-	A	A	A	-	B	A	A	A	B	B	B	A	B
S1_53944147_B	1	53944147	91.434	B	A	B	B	B	-	B	A	A	-	A	A	A	A	A	B	A	A	B	A	A	A	A	B	A	A	A	A	B	B	B	B	-	A	A	A	-	B	A	A	A	B	B	B	A	B
S1_53944165_B	1	53944165	91.434	B	A	B	B	B	-	B	A	A	-	A	A	A	A	A	B	A	A	B	A	A	A	A	B	A	A	A	A	B	B	B	B	-	A	A	A	-	B	A	A	A	B	B	B	A	B
S1_52746590	1	52746590	91.949	B	A	B	B	-	A	B	A	A	-	A	A	A	A	A	B	A	A	B	A	A	A	A	B	A	A	A	A	B	-	B	B	A	A	A	A	B	B	A	A	A	B	B	B	A	B
S1_52755557	1	52755557	91.949	B	A	B	B	-	-	B	A	A	-	A	A	A	A	A	B	A	A	B	A	A	A	A	B	A	A	A	A	B	B	B	B	A	A	A	A	-	B	A	A	A	B	B	B	A	B
S1_52969151_B	1	52969151	91.949	B	A	B	B	B	-	B	A	A	-	A	A	A	A	A	B	A	A	B	A	A	A	A	B	A	A	A	A	B	B	B	B	A	A	A	A	-	B	A	A	A	B	B	B	A	B
S1_54392276	1	54392276	93.025	B	B	B	B	-	-	B	A	A	-	A	A	A	A	A	B	A	A	B	A	A	A	A	B	A	A	A	A	B	B	B	B	A	A	A	A	-	B	A	A	A	B	B	B	A	B
S1_54464477_B	1	54464477	93.025	B	B	B	B	-	-	B	A	A	-	A	A	A	A	A	B	A	A	B	A	A	A	A	-	A	A	A	A	B	B	B	B	A	A	A	A	A	B	A	A	A	B	B	B	A	B
S1_54464478_B	1	54464478	93.025	B	B	B	B	-	-	B	A	A	-	A	A	A	A	A	B	A	A	B	A	A	A	A	-	A	A	A	A	B	B	B	B	A	A	A	A	A	B	A	A	A	B	B	B	A	B
S1_55102894	1	55102894	93.025	B	B	B	B	B	-	B	A	A	A	A	A	A	A	A	B	A	A	B	A	A	A	A	-	A	A	A	A	B	B	B	B	A	A	A	A	-	B	A	A	A	B	B	B	A	B
S1_54464077	1	54464077	94.089	B	B	B	B	A	A	B	A	A	-	A	A	A	A	A	B	A	A	B	A	A	A	A	-	A	A	A	A	B	B	B	B	A	A	A	A	B	B	A	A	A	B	B	B	A	B
S1_55470038	1	55470038	94.089	B	B	B	B	-	-	B	A	A	A	A	A	A	A	A	B	A	A	B	A	A	A	A	A	A	A	A	A	B	B	B	B	A	A	A	A	-	B	A	A	A	B	B	B	A	B
S1_55470039	1	55470039	94.089	B	B	B	B	-	-	B	A	A	A	A	A	A	A	A	B	A	A	B	A	A	A	A	A	A	A	A	A	B	B	B	B	A	A	A	A	-	B	A	A	A	B	B	B	A	B
S1_55519885	1	55519885	94.089	B	B	B	B	-	-	B	A	A	-	A	A	A	A	A	B	A	A	B	A	A	A	A	A	A	A	A	A	B	B	B	B	A	A	A	A	-	B	A	A	A	B	B	B	A	B
S1_55290746	1	55290746	94.599	B	B	B	B	-	-	B	A	A	B	A	A	A	A	A	B	A	A	B	A	A	A	A	A	A	A	A	A	B	B	B	B	A	A	A	A	-	B	A	A	A	B	B	B	A	B
S1_55290766	1	55290766	94.599	B	B	B	B	-	-	B	A	A	B	A	A	A	A	A	B	A	A	B	A	A	A	A	A	A	A	A	A	B	B	B	B	A	A	A	A	-	B	A	A	A	B	B	B	A	B
S1_58472639	1	58472639	102.4	B	B	B	B	-	A	B	A	A	B	A	A	A	A	A	B	B	B	B	A	A	A	A	B	A	A	A	A	-	B	B	B	A	A	A	A	-	B	A	A	A	B	B	B	A	B
S1_58516265	1	58516265	102.4	B	B	B	B	-	A	B	A	A	-	A	A	A	A	A	B	B	B	B	A	A	A	A	B	A	A	A	A	B	B	B	B	A	A	A	A	-	B	A	A	A	B	B	B	A	B
S1_58516291	1	58516291	102.4	B	B	B	B	-	A	B	A	A	-	A	A	A	A	A	B	B	B	B	A	A	A	A	B	A	A	A	A	B	B	B	B	A	A	A	A	-	B	A	A	A	B	B	B	A	B
S1_59114718_B	1	59114718	106.386	B	B	B	B	A	A	B	B	A	-	A	-	A	A	A	B	B	B	B	A	A	B	A	B	A	A	A	A	B	A	B	B	A	A	A	A	B	B	A	A	A	B	B	B	A	B
S1_59114756_B	1	59114756	106.386	B	B	B	B	A	A	B	B	A	-	A	-	A	A	A	B	B	B	B	A	A	B	A	B	A	A	A	A	B	A	B	B	A	A	A	A	B	B	A	A	A	B	B	B	A	B
S1_59114763_B	1	59114763	106.386	B	B	B	B	A	A	B	B	A	-	A	-	A	A	A	B	B	B	B	A	A	B	A	B	A	A	A	A	-	A	B	B	A	A	A	A	B	B	A	A	A	B	B	B	A	B
S1_59359352_B	1	59359352	106.386	B	B	B	B	A	A	B	B	A	B	A	-	A	A	A	B	B	B	B	A	A	B	A	B	A	A	A	A	B	A	B	B	A	A	A	A	B	B	A	A	A	B	B	B	A	B
S1_59359508	1	59359508	106.386	B	B	B	B	A	A	B	B	A	B	A	-	A	A	A	B	B	B	B	A	A	B	A	B	A	A	A	A	-	A	B	B	A	A	A	A	B	B	A	A	A	B	B	B	A	B
S1_59359510	1	59359510	106.386	B	B	B	B	A	A	B	B	A	B	A	-	A	A	A	B	B	B	B	A	A	B	A	B	A	A	A	A	-	A	B	B	A	A	A	A	B	B	A	A	A	B	B	B	A	B
S1_59359520	1	59359520	106.386	B	B	B	B	A	A	B	B	A	B	A	-	A	A	A	B	B	B	B	A	A	B	A	B	A	A	A	A	-	A	B	B	A	A	A	A	B	B	A	A	A	B	B	B	A	B
S1_59456537_B	1	59456537	106.891	B	B	B	B	A	B	B	B	A	-	A	-	A	A	A	B	B	B	B	A	A	B	A	B	A	A	A	A	B	A	B	B	A	A	A	A	B	B	A	A	A	B	B	B	A	B
S1_59456580_B	1	59456580	106.891	B	B	B	B	A	B	B	B	A	-	A	-	A	A	A	B	B	B	B	A	A	B	A	B	A	A	A	A	B	A	B	B	A	A	A	A	B	B	A	A	A	B	B	B	A	B
S1_58988830_B	1	58988830	108.438	B	B	B	B	A	A	B	B	A	-	A	A	A	A	A	B	B	B	B	A	A	B	A	B	A	A	A	A	-	A	B	B	A	A	A	A	B	B	A	A	A	B	B	B	A	B
S1_58988836_B	1	58988836	108.438	B	B	B	B	A	A	B	B	A	-	A	A	A	A	A	B	B	B	B	A	A	B	A	B	A	A	A	A	-	A	B	B	A	A	A	A	B	B	A	A	A	B	B	B	A	B
S1_59125904_B	1	59125904	108.438	B	B	B	B	A	A	B	B	A	B	A	A	A	A	A	B	B	B	B	A	A	B	A	B	A	A	A	A	A	A	B	B	A	A	A	A	B	B	A	A	A	B	B	B	A	B
S1_58987753	1	58987753	108.933	B	B	B	B	A	A	B	B	A	B	A	A	A	A	A	B	B	B	B	A	A	B	A	B	A	A	A	A	A	A	B	B	A	A	A	A	B	B	A	A	A	B	B	B	A	B
S1_59456536	1	59456536	109.913	B	B	B	B	A	B	B	B	A	B	A	-	A	A	A	B	B	B	B	A	A	B	A	B	A	A	A	A	A	A	B	B	A	A	A	A	B	B	A	A	A	B	B	B	A	B
S1_59456579	1	59456579	109.913	B	B	B	B	A	B	B	B	A	B	A	-	A	A	A	B	B	B	B	A	A	B	A	B	A	A	A	A	A	A	B	B	A	A	A	A	B	B	A	A	A	B	B	B	A	B
S1_59478504	1	59478504	109.913	B	B	B	B	A	B	B	B	A	-	A	-	A	A	A	B	B	B	B	A	A	B	A	B	A	A	A	A	A	A	B	B	A	A	A	A	B	B	A	A	A	B	B	B	A	B
S1_59970646	1	59970646	111.429	B	B	B	B	A	B	B	B	A	-	A	-	A	A	A	B	B	B	B	A	A	B	A	B	A	-	A	A	A	A	A	B	A	A	B	A	B	B	A	A	A	B	B	B	A	B
S1_60005820_B	1	60005820	111.429	B	B	B	B	A	B	B	B	A	-	A	B	A	A	A	B	B	B	B	A	A	B	A	B	A	A	A	A	-	A	A	B	A	A	B	A	B	B	A	A	A	B	B	B	A	B
S1_60005837_B	1	60005837	111.429	B	B	B	B	A	B	B	B	A	-	A	B	A	A	A	B	B	B	B	A	A	B	A	B	A	A	A	A	-	A	A	B	A	A	B	A	B	B	A	A	A	B	B	B	A	B
S1_60720902	1	60720902	112.96	B	B	B	B	A	B	B	B	A	A	A	B	A	A	A	B	B	B	B	A	A	B	A	B	A	A	A	A	-	A	A	B	A	A	B	A	A	B	A	A	A	B	B	B	A	B
S1_60720931	1	60720931	112.96	B	B	B	B	A	B	B	B	A	A	A	B	A	A	A	B	B	B	B	A	A	B	A	B	A	A	A	A	-	A	A	B	A	A	B	A	A	B	A	A	A	B	B	B	A	B
S1_60758110	1	60758110	112.96	B	B	B	B	A	B	B	B	A	-	A	B	A	A	A	B	B	B	B	A	A	B	A	B	A	A	A	A	-	A	A	B	A	A	B	A	A	B	A	A	A	B	B	B	A	B
S1_60665087_B	1	60665087	113.465	B	B	B	B	A	B	B	B	A	B	A	B	A	A	A	B	B	B	B	A	A	B	A	B	A	A	A	A	B	A	A	B	A	A	B	A	A	B	A	A	A	B	B	B	A	B
S1_60697386_B	1	60697386	113.465	B	B	B	B	A	B	B	B	A	-	A	B	A	A	A	B	B	B	B	A	A	B	A	B	A	A	A	A	B	A	-	B	A	A	B	A	A	B	A	A	A	B	B	B	A	B
S1_60697387_B	1	60697387	113.465	B	B	B	B	A	B	B	B	A	-	A	B	A	A	A	B	B	B	B	A	A	B	A	B	A	A	A	A	B	A	-	B	A	A	B	A	A	B	A	A	A	B	B	B	A	B
S1_60697388_B	1	60697388	113.465	B	B	B	B	A	B	B	B	A	-	A	B	A	A	A	B	B	B	B	A	A	B	A	B	A	A	A	A	B	A	-	B	A	A	B	A	A	B	A	A	A	B	B	B	A	B
S1_60776029_B	1	60776029	113.465	B	B	B	B	A	B	B	B	A	B	A	B	A	A	A	B	B	B	B	-	A	B	A	B	A	A	A	A	B	A	A	B	A	A	B	A	A	B	A	A	A	B	B	B	A	B
S1_60776045_B	1	60776045	113.465	B	B	B	B	A	B	B	B	A	B	A	B	A	A	A	B	B	B	B	-	A	B	A	B	A	A	A	A	B	A	A	B	A	A	B	A	A	B	A	A	A	B	B	B	A	B
S1_60697364_B	1	60697364	113.975	B	B	B	B	A	B	B	B	A	B	A	B	A	A	A	B	B	B	B	-	A	B	A	B	A	A	A	A	A	A	A	B	A	A	B	A	A	B	A	A	A	B	B	B	A	B
S1_60697365_B	1	60697365	113.975	B	B	B	B	A	B	B	B	A	B	A	B	A	A	A	B	B	B	B	-	A	B	A	B	A	A	A	A	A	A	A	B	A	A	B	A	A	B	A	A	A	B	B	B	A	B
S1_60697366_B	1	60697366	113.975	B	B	B	B	A	B	B	B	A	B	A	B	A	A	A	B	B	B	B	-	A	B	A	B	A	A	A	A	A	A	A	B	A	A	B	A	A	B	A	A	A	B	B	B	A	B
S1_60837330_B	1	60837330	115.976	B	B	B	B	A	B	B	B	A	A	A	B	A	A	A	B	B	B	B	B	A	B	A	B	A	A	A	A	A	A	A	B	A	A	B	A	A	B	A	A	A	B	B	B	A	B
S1_60837333_B	1	60837333	115.976	B	B	B	B	A	B	B	B	A	A	A	B	A	A	A	B	B	B	B	B	A	B	A	B	A	A	A	A	A	A	A	B	A	A	B	A	A	B	A	A	A	B	B	B	A	B
S1_60837334_B	1	60837334	115.976	B	B	B	B	A	B	B	B	A	A	A	B	A	A	A	B	B	B	B	B	A	B	A	B	A	A	A	A	A	A	A	B	A	A	B	A	A	B	A	A	A	B	B	B	A	B
S1_60837455	1	60837455	115.976	B	B	B	B	A	B	B	B	A	A	A	B	A	A	A	B	B	B	B	-	A	B	A	B	A	A	A	A	A	A	A	B	A	A	B	A	A	B	A	A	A	B	B	B	A	B
S1_60948455_B	1	60948455	118.039	B	B	B	B	A	B	B	B	A	A	A	B	A	A	A	B	B	B	B	-	A	B	A	B	A	A	A	A	-	A	A	B	A	A	B	A	A	B	A	A	A	B	B	B	A	B
S1_60954417_B	1	60954417	118.039	B	B	B	B	A	B	B	B	A	A	A	B	A	A	A	B	B	B	B	-	A	B	A	B	A	A	A	A	-	A	A	B	A	A	B	A	A	B	A	A	A	B	B	B	A	B
S1_61126179_B	1	61126179	119.049	B	B	B	B	A	B	B	B	A	A	A	B	A	A	A	B	B	B	B	A	A	B	A	A	A	A	A	A	A	A	A	B	A	A	B	A	A	B	A	A	A	B	B	B	A	B
S1_61126183_B	1	61126183	119.049	B	B	B	B	A	B	B	B	A	A	A	B	A	A	A	B	B	B	B	A	A	B	A	A	A	A	A	A	A	A	A	B	A	A	B	A	A	B	A	A	A	B	B	B	A	B
S1_61126226_B	1	61126226	119.049	B	B	B	B	A	B	B	B	A	A	A	B	A	A	A	B	B	B	B	A	A	B	A	A	A	A	A	A	A	A	A	B	A	A	B	A	A	B	A	A	A	B	B	B	A	B
S1_61140239	1	61140239	120.04	B	B	B	B	A	B	B	B	A	A	A	B	A	A	A	B	B	B	B	-	A	B	A	A	A	A	A	A	-	A	A	B	A	A	B	A	A	B	A	A	A	B	B	B	A	B
S1_61235145	1	61235145	120.04	B	B	B	B	A	B	B	B	A	A	A	B	A	A	A	B	B	B	B	A	A	B	A	A	A	A	A	A	-	A	A	B	A	A	B	A	A	B	A	A	A	B	B	B	A	B
S1_61235160	1	61235160	120.04	B	B	B	B	A	B	B	B	A	A	A	B	A	A	A	B	B	B	B	A	A	B	A	A	A	A	A	A	-	A	A	B	A	A	B	A	A	B	A	A	A	B	B	B	A	B
S1_61250358	1	61250358	120.04	B	B	B	B	A	B	B	B	A	A	A	B	A	A	A	B	B	B	B	-	A	B	A	A	A	A	A	A	B	A	A	B	A	A	B	A	A	B	A	A	A	B	B	B	A	B
S1_61250361	1	61250361	120.04	B	B	B	B	A	B	B	B	A	A	A	B	A	A	A	B	B	B	B	-	A	B	A	A	A	A	A	A	B	A	A	B	A	A	B	A	A	B	A	A	A	B	B	B	A	B
S1_61148537	1	61148537	120.545	B	B	B	B	A	B	B	B	A	A	A	B	A	A	A	B	B	B	B	-	A	B	A	A	A	A	A	A	-	A	A	B	A	A	B	A	A	B	A	A	A	B	B	B	A	B
S1_61158636_B	1	61158636	120.545	B	B	B	B	A	B	B	B	A	A	A	B	A	A	A	B	B	B	B	-	A	B	A	A	A	A	A	A	B	A	A	B	A	A	B	A	A	B	A	A	A	B	B	B	A	B
S1_61158640_B	1	61158640	120.545	B	B	B	B	A	B	B	B	A	A	A	B	A	A	A	B	B	B	B	-	A	B	A	A	A	A	A	A	B	A	A	B	A	A	B	A	A	B	A	A	A	B	B	B	A	B
S1_61158648_B	1	61158648	120.545	B	B	B	B	A	B	B	B	A	A	A	B	A	A	A	B	B	B	B	-	A	B	A	A	A	A	A	A	B	A	A	B	A	A	B	A	A	B	A	A	A	B	B	B	A	B
S1_61162275_B	1	61162275	120.545	B	B	B	B	A	B	B	B	A	A	A	B	A	A	A	B	B	B	B	A	A	B	A	A	A	A	A	A	-	A	A	B	A	A	B	A	A	B	A	A	A	B	B	B	A	B
S1_61162308	1	61162308	120.545	B	B	B	B	A	B	B	B	A	A	A	B	A	A	A	B	B	B	B	A	A	B	A	A	A	A	A	A	-	A	A	B	A	A	B	A	A	B	A	A	A	B	B	B	A	B
S1_60985846	1	60985846	121.05	B	B	B	B	A	B	B	B	A	A	A	B	A	A	A	B	B	B	B	-	A	B	A	A	A	A	A	A	A	A	A	B	A	A	B	A	A	B	A	A	A	B	B	B	A	B
S1_61115820	1	61115820	121.05	B	B	B	B	A	B	B	B	A	A	A	B	A	A	A	B	B	B	B	-	A	B	A	A	A	A	A	A	-	A	A	B	A	A	B	A	A	B	A	A	A	B	B	B	A	B
S1_61145976	1	61145976	121.05	B	B	B	B	A	B	B	B	A	A	A	B	A	A	A	B	B	B	B	-	A	B	A	A	A	A	A	A	-	A	A	B	A	A	B	A	A	B	A	A	A	B	B	B	A	B
S1_61221630	1	61221630	121.05	B	B	B	B	A	B	B	B	A	A	A	B	A	A	A	B	B	B	B	-	A	B	A	A	A	A	A	A	A	A	A	B	A	A	B	A	A	B	A	A	A	B	B	B	A	B
S1_61249055	1	61249055	121.05	B	B	B	B	A	B	B	B	A	A	A	B	A	A	A	B	B	B	B	-	A	B	A	A	A	A	A	A	B	A	A	B	A	A	B	A	A	B	A	A	A	B	B	B	A	B
S1_61241907	1	61241907	121.55	B	B	B	B	A	B	B	B	A	A	A	B	A	A	A	B	B	B	B	-	A	B	A	A	A	A	A	A	B	A	A	B	A	A	B	A	A	B	A	A	A	B	B	B	A	B
S1_61336566	1	61336566	123.531	B	B	B	B	A	B	A	B	A	A	A	B	A	A	A	B	B	B	B	B	A	B	A	A	A	A	A	A	B	A	A	B	A	A	B	A	A	B	A	A	A	-	B	B	A	A
S1_61358282	1	61358282	124.021	B	B	B	B	A	B	A	B	A	A	A	B	A	A	A	B	B	B	B	-	A	B	A	A	A	A	A	A	B	A	A	B	A	A	B	A	A	B	A	A	A	B	B	B	A	A
S1_61409548	1	61409548	124.021	B	B	B	B	A	B	A	B	A	A	A	B	A	A	A	B	B	B	B	A	A	B	A	A	A	A	A	A	B	A	A	B	A	A	B	A	A	B	A	A	A	B	B	B	A	A
S1_63388923	1	63388923	137.823	B	A	A	A	A	B	B	B	A	A	A	A	A	A	A	B	B	B	B	A	B	B	A	A	A	A	B	A	-	A	A	-	A	A	A	A	B	B	A	A	B	B	B	B	A	A
S1_63388935	1	63388935	137.823	B	A	A	A	A	B	B	B	A	A	A	A	A	A	A	B	B	B	B	A	B	B	A	A	A	A	B	A	-	A	A	-	A	A	A	A	B	B	A	A	B	B	B	B	A	A
S1_63487446	1	63487446	137.823	B	A	A	A	A	B	B	B	A	A	A	A	A	A	A	B	B	B	B	-	B	B	A	A	A	A	-	A	-	A	A	B	A	A	A	A	B	B	A	A	B	B	B	B	A	A
S1_63487447	1	63487447	137.823	B	A	A	A	A	B	B	B	A	A	A	A	A	A	A	B	B	B	B	-	B	B	A	A	A	A	-	A	-	A	A	B	A	A	A	A	B	B	A	A	B	B	B	B	A	A
S1_63488591	1	63488591	138.323	-	A	A	A	A	B	B	B	A	A	A	A	A	A	A	B	B	B	B	B	B	B	A	A	A	A	B	A	-	A	A	-	A	A	A	A	B	B	A	A	B	B	B	B	A	A
S1_64340228	1	64340228	142.73	B	A	A	A	B	B	B	B	A	A	A	A	A	A	A	B	B	B	B	A	A	B	A	A	A	A	-	A	B	A	A	B	A	A	A	A	B	B	B	A	B	B	B	B	A	A
S1_64340229	1	64340229	142.73	B	A	A	A	B	B	B	B	A	A	A	A	A	A	A	B	B	B	B	A	A	B	A	A	A	A	-	A	B	A	A	B	A	A	A	A	B	B	B	A	B	B	B	B	A	A
S1_64340230	1	64340230	142.73	B	A	A	A	B	B	B	B	A	A	A	A	A	A	A	B	B	B	B	A	A	B	A	A	A	A	-	A	B	A	A	B	A	A	A	A	B	B	B	A	B	B	B	B	A	A
S1_64409073	1	64409073	142.73	B	A	A	A	B	B	B	B	A	A	A	A	A	A	A	B	B	B	B	-	A	B	A	A	A	A	-	A	B	A	A	B	A	A	A	A	B	B	B	A	B	B	B	B	A	A
S1_64737834	1	64737834	144.859	-	A	A	A	B	B	B	B	A	A	A	A	A	A	A	B	B	B	B	-	-	B	A	A	A	A	-	A	B	A	A	-	A	A	B	A	B	B	B	A	B	B	B	B	A	A
S1_64750397	1	64750397	144.859	B	A	A	A	B	B	B	B	A	A	A	A	A	A	A	B	B	B	B	-	A	B	A	A	A	A	A	A	-	A	A	-	A	A	B	A	B	B	B	A	B	B	B	B	A	A
S1_64750400	1	64750400	144.859	B	A	A	A	B	B	B	B	A	A	A	A	A	A	A	B	B	B	B	-	A	B	A	A	A	A	A	A	-	A	A	-	A	A	B	A	B	B	B	A	B	B	B	B	A	A
S1_64801349	1	64801349	145.374	B	A	A	A	B	B	B	B	A	A	A	A	A	A	A	B	B	B	B	-	A	B	A	A	A	A	A	A	B	A	A	A	A	A	B	A	B	B	B	A	B	B	B	B	A	A
S1_64861019	1	64861019	145.89	-	A	A	A	B	B	B	B	A	A	A	A	A	A	A	B	B	B	B	A	A	B	A	A	A	A	-	A	-	A	A	A	A	A	B	A	B	B	B	A	B	B	B	B	A	A
S1_65566499_B	1	65566499	149.62	-	A	A	A	B	B	B	B	A	A	A	A	A	A	A	B	B	B	B	A	A	B	A	A	A	A	B	A	B	B	A	A	A	A	B	B	B	B	B	A	B	B	B	B	A	A
S1_65570412_B	1	65570412	149.62	-	A	A	A	B	B	B	B	A	A	A	A	A	A	A	B	B	B	B	A	A	B	A	A	A	A	B	A	B	B	A	A	A	A	B	B	B	B	B	A	B	B	B	B	A	A
S1_65605089_B	1	65605089	149.62	-	A	A	A	B	B	B	B	A	A	A	A	A	A	A	B	B	B	B	-	A	B	A	A	A	A	B	A	B	B	A	A	A	A	B	B	B	B	B	A	B	B	B	B	A	A
S1_66026888_B	1	66026888	149.62	B	A	A	A	B	B	B	B	A	A	A	A	A	A	A	B	B	B	B	-	A	B	A	A	A	A	B	A	B	B	A	A	A	A	B	B	B	B	B	A	B	B	B	B	A	A
S1_66026938_B	1	66026938	149.62	B	A	A	A	B	B	B	B	A	A	A	A	A	A	A	B	B	B	B	-	A	B	A	A	A	A	B	A	B	B	A	A	A	A	B	B	B	B	B	A	B	B	B	B	A	A
S1_66026941_B	1	66026941	149.62	B	A	A	A	B	B	B	B	A	A	A	A	A	A	A	B	B	B	B	-	A	B	A	A	A	A	B	A	B	B	A	A	A	A	B	B	B	B	B	A	B	B	B	B	A	A
S1_66026945_B	1	66026945	149.62	B	A	A	A	B	B	B	B	A	A	A	A	A	A	A	B	B	B	B	-	A	B	A	A	A	A	B	A	B	B	A	A	A	A	B	B	B	B	B	A	B	B	B	B	A	A
S1_66554365_B	1	66554365	150.13	-	A	A	A	B	B	B	B	A	A	A	A	A	A	A	B	B	B	B	-	A	B	A	A	A	A	B	A	B	B	A	A	A	A	B	B	B	B	B	A	B	B	B	B	A	A
S1_66575039_B	1	66575039	150.13	B	A	A	A	B	B	B	B	A	A	A	A	A	A	A	B	B	B	B	B	A	B	A	A	A	A	B	A	B	B	A	A	A	A	B	B	B	B	B	A	B	B	B	B	A	A
S1_66575052_B	1	66575052	150.13	B	A	A	A	B	B	B	B	A	A	A	A	A	A	A	B	B	B	B	B	A	B	A	A	A	A	B	A	B	B	A	A	A	A	B	B	B	B	B	A	B	B	B	B	A	A
S1_66575389_B	1	66575389	150.13	A	A	A	A	B	B	B	B	A	A	A	A	A	A	A	B	B	B	B	-	A	B	A	A	A	A	B	A	B	B	A	A	A	A	B	B	B	B	B	A	B	B	B	B	A	A
S1_66650785_B	1	66650785	150.13	-	A	A	A	B	B	B	B	A	A	A	A	A	A	A	B	B	B	B	B	A	B	A	A	A	A	B	A	B	B	A	A	A	A	B	B	B	B	B	A	B	B	B	B	A	A
S1_66650801_B	1	66650801	150.13	-	A	A	A	B	B	B	B	A	A	A	A	A	A	A	B	B	B	B	B	A	B	A	A	A	A	B	A	B	B	A	A	A	A	B	B	B	B	B	A	B	B	B	B	A	A
S1_66775244_B	1	66775244	150.13	-	A	A	A	B	B	B	B	A	A	A	A	A	A	A	B	B	B	B	-	A	B	A	A	A	A	B	-	B	B	A	A	A	A	B	B	B	B	B	A	B	B	B	B	A	A
S1_66786951_B	1	66786951	150.13	B	A	A	A	B	B	B	B	A	A	A	A	A	A	A	B	B	B	B	-	A	B	A	A	A	A	B	-	B	B	A	A	A	A	B	B	B	B	B	A	B	B	B	B	A	A
S1_66787138_B	1	66787138	150.13	B	A	A	A	B	B	B	B	A	A	A	A	A	A	A	B	B	B	B	-	A	B	A	A	A	A	B	A	B	B	A	A	A	A	B	B	B	B	B	A	B	B	B	B	A	A
S1_66821747_B	1	66821747	150.13	-	A	A	A	B	B	B	B	A	A	A	A	A	A	A	B	B	B	B	-	A	B	A	A	A	A	B	-	B	B	A	A	A	A	B	B	B	B	B	A	B	B	B	B	A	A
S1_66821751_B	1	66821751	150.13	-	A	A	A	B	B	B	B	A	A	A	A	A	A	A	B	B	B	B	-	A	B	A	A	A	A	B	-	B	B	A	A	A	A	B	B	B	B	B	A	B	B	B	B	A	A
S1_66821782_B	1	66821782	150.13	-	A	A	A	B	B	B	B	A	A	A	A	A	A	A	B	B	B	B	-	A	B	A	A	A	A	B	-	B	B	A	A	A	A	B	B	B	B	B	A	B	B	B	B	A	A
S1_66828430_B	1	66828430	150.13	B	A	A	A	B	B	B	B	A	A	A	A	A	A	A	B	B	B	B	A	A	B	A	A	A	A	B	A	B	B	A	A	A	A	B	B	B	B	B	A	B	B	B	B	A	A
S1_66828472_B	1	66828472	150.13	B	A	A	A	B	B	B	B	A	A	A	A	A	A	A	B	B	B	B	A	A	B	A	A	A	A	B	A	B	B	A	A	A	A	B	B	B	B	B	A	B	B	B	B	A	A
S1_66828707_B	1	66828707	150.13	-	A	A	A	B	B	B	B	A	A	A	A	A	A	A	B	B	B	B	A	A	B	A	A	A	A	B	A	B	B	A	A	A	A	B	B	B	B	B	A	B	B	B	B	A	A
S1_66897245_B	1	66897245	150.13	B	A	A	A	B	B	B	B	A	A	A	A	A	A	A	B	B	B	B	-	A	B	A	A	A	A	B	-	B	B	A	A	A	A	B	B	B	B	B	A	B	B	B	B	A	A
S1_66897246_B	1	66897246	150.13	B	A	A	A	B	B	B	B	A	A	A	A	A	A	A	B	B	B	B	-	A	B	A	A	A	A	B	-	B	B	A	A	A	A	B	B	B	B	B	A	B	B	B	B	A	A
S1_66897247_B	1	66897247	150.13	B	A	A	A	B	B	B	B	A	A	A	A	A	A	A	B	B	B	B	-	A	B	A	A	A	A	B	-	B	B	A	A	A	A	B	B	B	B	B	A	B	B	B	B	A	A
S1_66553149_B	1	66553149	150.636	B	A	A	A	B	B	B	B	A	A	A	A	A	A	A	B	B	B	B	-	A	B	A	A	A	A	B	-	B	B	A	A	A	A	B	B	B	B	B	A	B	B	B	B	A	A
S1_66553165_B	1	66553165	150.636	B	A	A	A	B	B	B	B	A	A	A	A	A	A	A	B	B	B	B	-	A	B	A	A	A	A	B	-	B	B	A	A	A	A	B	B	B	B	B	A	B	B	B	B	A	A
S1_66824840_B	1	66824840	151.626	-	A	A	A	B	B	B	B	A	A	A	A	A	A	A	B	B	B	B	B	A	B	A	A	A	A	B	A	B	B	A	A	A	A	B	B	B	B	B	A	B	B	B	B	A	A
S1_66824882_B	1	66824882	151.626	-	A	A	A	B	B	B	B	A	A	A	A	A	A	A	B	B	B	B	B	A	B	A	A	A	A	B	A	B	B	A	A	A	A	B	B	B	B	B	A	B	B	B	B	A	A
S1_66564532_B	1	66564532	153.082	-	A	A	A	B	B	B	B	A	A	A	A	A	A	A	B	B	B	B	B	A	B	A	A	A	A	B	A	B	B	A	A	A	A	B	B	B	B	B	A	B	B	B	B	A	A
S1_66564545_B	1	66564545	153.082	-	A	A	A	B	B	B	B	A	A	A	A	A	A	A	B	B	B	B	B	A	B	A	A	A	A	B	A	B	B	A	A	A	A	B	B	B	B	B	A	B	B	B	B	A	A
S1_66713027_B	1	66713027	153.082	B	A	A	A	B	B	B	B	A	A	A	A	A	A	A	B	B	B	B	-	A	B	A	A	A	A	B	A	B	B	A	A	A	A	B	B	B	B	B	A	B	B	B	B	A	A
S1_66723316_B	1	66723316	153.082	-	A	A	A	B	B	B	B	A	A	A	A	A	A	A	B	B	B	B	-	A	B	A	A	A	A	B	A	B	B	A	A	A	A	B	B	B	B	B	A	B	B	B	B	A	A
S1_66723328_B	1	66723328	153.082	-	A	A	A	B	B	B	B	A	A	A	A	A	A	A	B	B	B	B	-	A	B	A	A	A	A	B	A	B	B	A	A	A	A	B	B	B	B	B	A	B	B	B	B	A	A
S1_66554507_B	1	66554507	153.568	B	A	A	A	B	B	B	B	A	A	A	A	A	A	A	B	B	B	B	-	A	B	A	A	A	A	B	-	B	B	A	A	A	A	B	B	B	B	B	A	B	B	B	B	A	A
S1_66720723_B	1	66720723	153.568	-	A	A	A	B	B	B	B	A	A	A	A	A	A	A	B	B	B	B	-	A	B	A	A	A	A	B	A	B	B	A	A	A	A	B	B	B	B	B	A	B	B	B	B	A	A
S1_66695008_B	1	66695008	154.063	B	A	A	A	B	B	B	B	A	A	A	A	A	A	A	B	B	B	B	-	A	B	A	A	A	A	B	A	B	B	A	A	A	A	B	B	B	B	B	A	B	B	B	B	A	A
S1_66695009_B	1	66695009	154.063	B	A	A	A	B	B	B	B	A	A	A	A	A	A	A	B	B	B	B	-	A	B	A	A	A	A	B	A	B	B	A	A	A	A	B	B	B	B	B	A	B	B	B	B	A	A
S1_66695028_B	1	66695028	154.063	B	A	A	A	B	B	B	B	A	A	A	A	A	A	A	B	B	B	B	-	A	B	A	A	A	A	B	A	B	B	A	A	A	A	B	B	B	B	B	A	B	B	B	B	A	A
S1_66695041_B	1	66695041	154.063	B	A	A	A	B	B	B	B	A	A	A	A	A	A	A	B	B	B	B	-	A	B	A	A	A	A	B	A	B	B	A	A	A	A	B	B	B	B	B	A	B	B	B	B	A	A
S1_66140059_B	1	66140059	154.568	-	A	A	A	B	B	B	B	A	A	A	A	A	A	A	B	B	B	B	-	A	B	A	A	A	A	B	-	B	B	A	A	A	A	B	B	B	B	B	A	B	B	B	B	A	A
S1_66261086_B	1	66261086	154.568	-	A	A	A	B	B	B	B	A	A	A	A	A	A	A	B	B	B	B	-	A	B	A	A	A	A	B	-	B	B	A	A	A	A	B	B	B	B	B	A	B	B	B	B	A	A
S1_66550225_B	1	66550225	154.568	B	A	A	A	B	B	B	B	A	A	A	A	A	A	A	B	B	B	B	B	A	B	A	A	A	A	B	-	B	B	A	A	A	A	B	B	B	B	B	A	B	B	B	B	A	A
S1_66632444_B	1	66632444	154.568	B	A	A	A	B	B	B	B	A	A	A	A	A	A	A	B	B	B	B	B	A	B	A	A	A	A	B	A	B	B	A	A	A	A	B	B	B	B	B	A	B	B	B	B	A	A
S1_66643373_B	1	66643373	154.568	B	A	A	A	B	B	B	B	A	A	A	A	A	A	A	B	B	B	B	A	A	B	A	A	A	A	B	-	B	B	A	A	A	A	B	B	B	B	B	A	B	B	B	B	A	A
S1_66830103_B	1	66830103	154.568	-	A	A	A	B	B	B	B	A	A	A	A	A	A	A	B	B	B	B	-	A	B	A	A	A	A	B	A	B	B	A	A	A	A	B	B	B	B	B	A	B	B	B	B	A	A
S1_66898262_B	1	66898262	154.568	-	A	A	A	B	-	B	B	A	A	A	A	A	A	A	B	B	B	B	-	A	B	A	A	A	A	B	B	B	B	A	A	A	A	B	B	B	B	B	A	B	B	B	B	A	A
S1_67073525_B	1	67073525	154.568	B	A	A	A	B	B	B	B	A	A	A	A	A	A	A	B	B	B	B	-	A	B	A	A	A	A	B	-	B	B	A	A	A	A	B	B	B	B	B	A	B	B	B	B	A	A
S1_67073827_B	1	67073827	154.568	B	A	A	A	B	B	B	B	A	A	A	A	A	A	A	B	B	B	B	-	A	B	A	A	A	A	B	-	B	B	A	A	A	A	B	B	B	B	B	A	B	B	B	B	A	A
S1_67191688_B	1	67191688	154.568	-	A	A	A	B	B	B	B	A	A	A	A	A	A	A	B	B	B	B	-	A	B	A	A	A	A	B	A	B	B	A	A	A	A	B	B	B	B	B	A	B	B	B	B	A	A
S1_67191691_B	1	67191691	154.568	-	A	A	A	B	B	B	B	A	A	A	A	A	A	A	B	B	B	B	-	A	B	A	A	A	A	B	A	B	B	A	A	A	A	B	B	B	B	B	A	B	B	B	B	A	A
S1_67295427_B	1	67295427	154.568	-	A	A	A	B	B	B	B	A	A	A	A	A	A	A	B	B	B	B	-	A	B	A	A	A	A	B	B	B	B	A	A	A	A	B	B	B	B	B	A	B	B	B	B	A	A
S1_67392250_B	1	67392250	156.697	B	A	A	A	B	B	B	B	A	A	A	A	A	A	B	B	-	-	B	B	A	B	A	A	A	A	B	B	B	B	A	A	A	A	B	B	B	B	B	A	B	B	B	B	A	A
S1_68247460_B	1	68247460	156.697	-	A	A	A	B	B	B	B	A	A	A	A	A	A	B	B	A	A	B	-	A	B	A	A	A	A	B	B	B	B	A	A	A	A	B	B	B	B	B	A	B	B	B	B	A	A
S1_68247461_B	1	68247461	156.697	-	A	A	A	B	B	B	B	A	A	A	A	A	A	B	B	A	A	B	-	A	B	A	A	A	A	B	B	B	B	A	A	A	A	B	B	B	B	B	A	B	B	B	B	A	A
S1_68247462_B	1	68247462	156.697	-	A	A	A	B	B	B	B	A	A	A	A	A	A	B	B	A	A	B	-	A	B	A	A	A	A	B	B	B	B	A	A	A	A	B	B	B	B	B	A	B	B	B	B	A	A
S1_68294734_B	1	68294734	156.697	-	A	A	A	B	B	B	B	A	A	A	A	A	A	B	B	A	A	B	-	A	B	A	A	A	A	B	B	B	B	A	A	A	A	B	B	B	B	B	A	-	B	B	B	A	A
S1_68247774_B	1	68247774	157.207	B	A	A	A	B	B	B	B	A	A	A	A	A	A	B	B	-	A	B	-	A	B	A	A	A	A	B	B	B	B	A	A	A	A	B	B	B	B	B	A	-	B	B	B	A	A
S1_68297353_B	1	68297353	157.207	B	A	A	A	B	B	B	B	A	A	A	A	A	A	B	B	B	A	B	B	A	B	A	A	A	A	B	B	B	B	A	A	A	A	B	B	B	B	B	A	-	B	B	B	A	A
S1_67845989_B	1	67845989	157.702	B	A	A	A	B	B	B	B	A	A	A	A	A	A	B	B	-	A	B	B	A	B	A	A	A	A	B	B	B	B	A	A	A	A	B	B	B	B	B	A	B	B	B	B	A	A
S1_67896434_B	1	67896434	157.702	B	A	A	A	B	B	B	B	A	A	A	A	A	A	B	B	-	A	B	-	A	B	A	A	A	A	B	B	B	B	A	A	A	A	B	B	B	B	B	A	B	B	B	B	A	A
S1_68025428_B	1	68025428	157.702	B	A	A	A	B	B	B	B	A	A	A	A	A	A	B	B	-	A	B	-	A	B	A	A	A	A	B	B	B	B	A	A	A	A	B	B	B	B	B	A	B	B	B	B	A	A
S1_68161352_B	1	68161352	157.702	-	A	A	A	B	B	B	B	A	A	A	A	A	A	B	B	A	A	B	B	A	B	A	A	A	A	B	B	B	B	A	A	A	A	B	B	B	B	B	A	-	B	B	B	A	A
S1_67683463_B	1	67683463	158.202	B	A	A	A	B	B	B	B	A	A	A	A	A	A	B	B	A	A	B	-	A	B	A	A	A	A	B	B	B	B	A	A	A	A	B	B	B	B	B	A	B	B	B	B	A	A
S1_68094571_B	1	68094571	158.202	B	A	A	A	B	B	B	B	A	A	A	A	A	A	B	B	A	A	B	-	A	B	A	A	A	A	B	B	B	B	A	A	A	A	B	B	B	B	B	A	B	B	B	B	A	A
S1_68193384_B	1	68193384	158.202	B	A	A	A	B	B	B	B	A	A	A	A	A	A	B	B	-	A	B	-	A	B	A	A	A	A	B	B	B	B	A	A	A	A	B	B	B	B	B	A	-	B	B	B	A	A
S1_68213734_B	1	68213734	158.202	B	A	A	A	B	B	B	B	A	A	A	A	A	A	B	B	B	A	B	-	A	B	A	A	A	A	B	B	B	B	A	A	A	A	B	B	B	B	B	A	-	B	B	B	A	A
S1_68301067_B	1	68301067	158.202	B	A	A	A	B	B	B	B	A	A	A	A	A	A	B	B	B	A	B	B	A	B	A	A	A	A	B	B	B	B	A	A	A	A	B	B	B	B	B	A	-	B	B	B	A	A
S1_68577648_B	1	68577648	160.809	B	A	A	A	B	B	B	B	A	A	A	A	A	A	B	B	B	A	B	-	A	B	A	A	B	A	A	B	B	B	A	A	A	A	B	B	B	B	B	A	B	B	B	B	A	A
S1_68698671_B	1	68698671	160.809	B	A	A	A	B	B	B	B	A	A	A	A	A	A	B	B	B	A	B	A	A	B	A	A	B	A	A	B	B	B	A	A	A	A	B	B	B	B	B	A	B	B	B	B	A	A
S1_68698673_B	1	68698673	160.809	B	A	A	A	B	B	B	B	A	A	A	A	A	A	B	B	B	A	B	A	A	B	A	A	B	A	A	B	B	B	A	A	A	A	B	B	B	B	B	A	B	B	B	B	A	A
S1_68698674_B	1	68698674	160.809	B	A	A	A	B	B	B	B	A	A	A	A	A	A	B	B	B	A	B	A	A	B	A	A	B	A	A	B	B	B	A	A	A	A	B	B	B	B	B	A	B	B	B	B	A	A
S1_68578501_B	1	68578501	161.314	B	A	A	A	B	B	B	B	A	A	A	A	A	A	B	B	B	A	B	A	A	B	A	A	B	B	A	B	B	B	A	A	A	A	B	B	B	B	B	A	B	B	B	B	A	A
S1_68578525_B	1	68578525	161.314	B	A	A	A	B	B	B	B	A	A	A	A	A	A	B	B	B	A	B	A	A	B	A	A	B	B	A	B	B	B	A	A	A	A	B	B	B	B	B	A	B	B	B	B	A	A
S1_68707540_B	1	68707540	161.314	B	A	A	A	B	B	B	B	A	A	A	A	A	A	B	B	-	A	B	-	A	B	A	A	B	B	A	B	B	B	A	A	A	A	B	B	B	B	B	A	B	B	B	B	A	A
S1_68775720_B	1	68775720	161.314	B	A	A	A	B	B	B	B	A	A	A	A	A	-	B	B	B	A	B	A	A	B	A	A	B	-	A	B	B	B	A	A	A	A	B	B	B	B	B	A	B	B	B	B	A	A
S1_68775721_B	1	68775721	161.314	B	A	A	A	B	B	B	B	A	A	A	A	A	-	B	B	B	A	B	A	A	B	A	A	B	-	A	B	B	B	A	A	A	A	B	B	B	B	B	A	B	B	B	B	A	A
S1_68736161_B	1	68736161	162.356	B	A	A	A	B	B	B	B	A	A	A	A	A	A	B	B	A	-	B	-	A	B	A	A	B	B	A	B	B	B	A	A	A	A	B	B	B	B	B	A	B	B	B	B	A	A
S1_68793753_B	1	68793753	162.356	B	A	A	A	B	B	B	B	A	A	A	A	A	A	B	B	A	A	B	B	A	B	A	A	B	-	A	B	B	B	A	A	A	A	B	B	B	B	B	A	B	B	B	B	A	A
S1_68817204_B	1	68817204	162.356	B	A	A	A	B	B	B	B	A	A	A	A	A	A	B	B	A	A	B	A	A	B	A	A	B	B	A	B	B	B	A	A	A	A	B	B	B	B	B	A	B	B	B	B	A	A
S1_69379379_B	1	69379379	162.356	B	A	A	A	B	B	B	B	A	A	A	A	A	A	B	B	A	A	B	-	A	B	A	A	B	-	A	B	B	B	A	A	A	A	B	B	B	B	B	A	B	B	B	B	A	A
S1_69380274_B	1	69380274	162.356	-	A	A	A	B	B	B	B	A	A	A	A	A	A	B	B	A	A	B	-	A	B	A	A	B	-	A	B	B	B	A	A	-	A	B	B	B	B	B	A	B	B	B	B	A	A
S1_69434474_B	1	69434474	162.877	B	A	A	A	B	B	B	B	A	A	A	A	A	A	B	B	A	A	B	-	A	B	A	A	B	-	A	B	B	B	A	A	A	A	B	B	B	B	B	A	B	B	B	B	A	A
S1_69480869_B	1	69480869	162.877	-	A	A	A	B	B	B	B	A	A	A	A	A	A	B	B	A	A	B	-	A	B	A	A	B	-	A	B	B	B	A	A	A	A	B	B	B	B	B	A	B	B	B	B	A	A
S1_69491707_B	1	69491707	162.877	B	A	A	A	B	B	B	B	A	A	A	A	A	A	B	B	-	A	B	-	A	B	A	A	B	-	A	B	B	B	A	A	A	A	B	B	B	B	B	A	B	B	B	B	A	A
S1_69506238_B	1	69506238	162.877	B	A	A	A	B	B	B	B	A	A	A	A	A	A	B	B	A	A	B	B	A	B	A	A	B	A	A	B	B	B	A	A	A	A	B	B	B	B	B	A	B	B	B	B	A	A
S1_69861409_B	1	69861409	162.877	B	A	A	A	B	B	B	B	A	A	A	A	A	A	B	B	A	A	B	B	A	B	A	A	B	B	A	B	B	B	A	A	A	A	B	B	B	B	B	A	B	B	B	B	A	A
S1_70159353_B	1	70159353	163.392	-	A	A	A	B	A	B	B	A	A	A	A	A	A	B	B	A	A	B	-	A	B	A	A	B	-	A	B	B	B	A	A	A	A	B	B	B	B	B	A	B	B	B	B	A	A
S1_70159365_B	1	70159365	163.392	-	A	A	A	B	A	B	B	A	A	A	A	A	A	B	B	A	A	B	-	A	B	A	A	B	-	A	B	B	B	A	A	A	A	B	B	B	B	B	A	B	B	B	B	A	A
S1_70160234_B	1	70160234	163.392	B	A	A	A	B	A	B	B	A	A	A	A	A	A	B	B	-	A	B	A	A	B	A	A	B	A	A	B	B	B	A	A	A	A	B	B	B	B	B	A	B	B	B	B	A	A
S1_70160236_B	1	70160236	163.392	B	A	A	A	B	A	B	B	A	A	A	A	A	A	B	B	-	A	B	A	A	B	A	A	B	A	A	B	B	B	A	A	A	A	B	B	B	B	B	A	B	B	B	B	A	A
S1_70160237_B	1	70160237	163.392	B	A	A	A	B	A	B	B	A	A	A	A	A	A	B	B	-	A	B	A	A	B	A	A	B	A	A	B	B	B	A	A	A	A	B	B	B	B	B	A	B	B	B	B	A	A
S1_70160238_B	1	70160238	163.392	B	A	A	A	B	A	B	B	A	A	A	A	A	A	B	B	-	A	B	A	A	B	A	A	B	A	A	B	B	B	A	A	A	A	B	B	B	B	B	A	B	B	B	B	A	A
S1_69382707_B	1	69382707	163.902	-	A	A	A	B	B	B	B	A	A	A	A	A	A	B	B	A	A	B	-	A	B	A	A	B	-	A	B	B	B	A	A	A	A	B	B	B	B	B	A	B	B	B	B	A	A
S1_70936436_B	1	70936436	165.449	A	A	A	A	B	A	B	B	A	A	A	A	A	A	B	B	-	A	B	-	A	B	A	A	B	-	A	B	B	B	A	A	A	A	B	B	B	B	B	A	B	B	B	B	A	-
S1_70982367_B	1	70982367	165.449	A	A	A	A	B	A	B	B	A	A	A	A	A	A	B	B	A	A	B	-	A	B	A	A	B	-	A	B	B	B	A	A	A	A	B	B	B	B	B	A	B	B	B	B	A	A
S1_70982378_B	1	70982378	165.449	A	A	A	A	B	A	B	B	A	A	A	A	A	A	B	B	A	A	B	-	A	B	A	A	B	-	A	B	B	B	A	A	A	A	B	B	B	B	B	A	B	B	B	B	A	A
S1_70982399_B	1	70982399	165.449	A	A	A	A	B	A	B	B	A	A	A	A	A	A	B	B	A	A	B	-	A	B	A	A	B	-	A	B	B	B	A	A	A	A	B	B	B	B	B	A	B	B	B	B	A	A
S1_71000199_B	1	71000199	165.935	A	A	A	A	B	A	B	B	A	A	A	A	A	A	B	B	A	A	B	-	A	B	A	A	B	-	A	B	B	B	A	A	A	A	B	B	B	B	B	A	B	B	B	B	A	A
S1_71000204_B	1	71000204	165.935	A	A	A	A	B	A	B	B	A	A	A	A	A	A	B	B	A	A	B	-	A	B	A	A	B	-	A	B	B	B	A	A	A	A	B	B	B	B	B	A	B	B	B	B	A	A
S1_71000230_B	1	71000230	165.935	A	A	A	A	B	A	B	B	A	A	A	A	A	A	B	B	A	A	B	-	A	B	A	A	B	-	A	B	B	B	A	A	A	A	B	B	B	B	B	A	B	B	B	B	A	A
S1_71000231_B	1	71000231	165.935	A	A	A	A	B	A	B	B	A	A	A	A	A	A	B	B	A	A	B	-	A	B	A	A	B	-	A	B	B	B	A	A	A	A	B	B	B	B	B	A	B	B	B	B	A	A
S1_70864662_B	1	70864662	166.935	A	A	A	A	B	A	B	B	A	A	A	A	A	A	B	B	-	A	B	B	A	B	A	A	B	A	A	-	B	B	A	A	A	A	B	B	B	B	B	A	B	B	B	B	A	A
S1_71000299_B	1	71000299	166.935	A	A	A	A	B	A	B	B	A	A	A	A	A	A	B	B	A	A	B	-	A	B	A	A	B	-	A	B	B	B	A	A	A	A	B	B	B	B	B	A	B	B	B	B	A	A
S1_71000306_B	1	71000306	166.935	A	A	A	A	B	A	B	B	A	A	A	A	A	A	B	B	A	A	B	-	A	B	A	A	B	-	A	B	B	B	A	A	A	A	B	B	B	B	B	A	B	B	B	B	A	A
S1_72000492_B	1	72000492	169.019	A	A	A	A	B	A	B	B	A	A	B	A	A	A	B	B	-	A	B	-	A	B	A	A	B	-	A	B	B	B	A	A	A	A	B	B	B	B	B	A	B	B	B	B	-	A
S1_72000634	1	72000634	169.019	A	A	A	A	B	A	B	B	A	A	-	A	A	A	B	B	A	A	B	-	A	B	A	A	B	-	A	B	B	B	A	A	A	A	B	B	B	B	B	A	B	B	B	B	A	A
S1_72010032	1	72010032	169.019	A	A	A	A	B	A	B	B	A	A	-	A	A	A	B	B	A	A	B	A	A	B	A	A	B	-	A	B	B	B	A	A	A	A	B	B	B	B	B	A	B	B	B	B	A	A
S1_72476167	1	72476167	173.331	A	A	A	A	A	A	B	B	A	A	A	A	A	A	B	B	A	A	B	-	A	B	B	A	B	A	A	B	B	B	A	A	A	A	B	B	B	A	B	A	A	B	B	A	-	A
S1_72476168	1	72476168	173.331	A	A	A	A	A	A	B	B	A	A	A	A	A	A	B	B	A	A	B	-	A	B	B	A	B	A	A	B	B	B	A	A	A	A	B	B	B	A	B	A	A	B	B	A	-	A
S1_72476169	1	72476169	173.331	A	A	A	A	A	A	B	B	A	A	A	A	A	A	B	B	A	A	B	-	A	B	B	A	B	A	A	B	B	B	A	A	A	A	B	B	B	A	B	A	A	B	B	A	-	A
S1_72659700	1	72659700	176.597	A	A	A	A	B	A	B	B	A	A	A	-	B	B	B	B	A	A	B	A	A	B	-	A	B	-	A	B	B	B	A	A	B	A	B	B	B	A	B	A	-	B	B	A	-	A
S1_72678994	1	72678994	176.597	A	A	A	A	B	A	B	B	A	A	A	A	B	B	B	B	A	A	B	A	A	B	A	A	B	A	A	B	B	B	A	A	B	A	B	B	B	A	B	A	-	B	B	A	B	A
S1_72746762	1	72746762	177.102	A	A	A	A	-	A	B	B	A	A	A	A	B	B	B	B	A	A	B	A	A	B	-	A	B	A	A	B	B	B	A	A	B	A	B	B	B	A	B	A	A	B	B	A	-	A
S1_72763309	1	72763309	177.102	A	A	A	A	-	A	B	B	A	A	A	A	B	B	B	B	A	A	B	A	A	B	A	A	B	A	A	B	B	B	A	A	B	A	B	B	B	A	B	A	A	B	B	A	A	A
S1_72763310	1	72763310	177.102	A	A	A	A	-	A	B	B	A	A	A	A	B	B	B	B	A	A	B	A	A	B	A	A	B	A	A	B	B	B	A	A	B	A	B	B	B	A	B	A	A	B	B	A	A	A
S1_72884568	1	72884568	177.102	A	A	A	A	B	A	B	B	A	A	A	A	B	B	B	B	A	A	B	A	A	B	A	A	B	-	A	B	B	B	A	A	B	A	B	B	B	A	B	A	A	B	B	A	A	A
S1_72884579	1	72884579	177.102	A	A	A	A	B	A	B	B	A	A	A	A	B	B	B	B	A	A	B	A	A	B	A	A	B	A	A	B	B	B	A	A	B	A	B	B	B	A	B	A	A	B	B	A	A	A
S1_72884588	1	72884588	177.102	A	A	A	A	B	A	B	B	A	A	A	A	B	B	B	B	A	A	B	A	A	B	A	A	B	A	A	B	B	B	A	A	B	A	B	B	B	A	B	A	A	B	B	A	A	A
S1_72800131_B	1	72800131	177.597	A	A	A	A	B	A	B	B	A	A	A	A	B	B	B	B	A	A	B	A	A	B	B	A	B	A	A	B	B	B	A	A	B	A	B	B	B	A	B	A	A	B	B	A	A	A
S1_72824974_B	1	72824974	178.087	A	A	A	A	-	A	B	B	A	A	A	A	B	B	B	B	A	A	B	A	A	B	-	A	B	-	A	B	B	B	A	A	B	A	B	B	B	A	B	A	A	B	B	A	-	A
S1_72846744_B	1	72846744	178.087	A	A	A	A	-	A	B	B	A	A	A	-	B	B	B	B	A	A	B	A	A	B	A	A	B	A	A	B	B	B	A	A	B	A	B	B	B	A	B	A	A	B	B	A	A	A
S1_72940418_B	1	72940418	178.087	A	A	A	A	B	A	B	B	A	A	A	B	B	B	B	B	A	A	B	A	A	B	-	A	B	-	A	B	B	B	-	A	B	A	B	B	B	A	B	A	A	B	B	A	A	A
S1_72910282_B	1	72910282	178.577	A	A	A	A	-	A	B	B	A	A	A	A	B	B	B	B	A	A	B	A	A	B	A	A	B	-	A	B	B	B	A	A	B	A	B	B	B	A	B	A	A	B	B	A	A	A
S1_72950013	1	72950013	178.577	A	A	A	A	A	A	B	B	A	A	A	-	B	B	B	B	A	A	B	A	A	B	A	A	B	-	A	B	B	B	A	A	B	A	B	B	B	A	B	A	A	B	B	A	A	A
S1_73208496	1	73208496	178.577	A	A	A	A	A	A	B	B	A	A	A	-	B	B	B	B	A	A	B	A	A	B	A	A	B	-	A	B	B	B	-	A	B	A	B	B	B	A	B	A	A	B	B	A	A	A
S1_73236559	1	73236559	179.087	A	A	A	A	-	A	B	B	A	A	A	-	B	B	B	B	A	A	B	A	A	B	-	A	B	-	A	B	B	B	-	A	B	A	B	B	B	A	B	A	A	B	B	A	A	A
S1_73245782	1	73245782	179.087	A	A	A	A	A	A	B	B	A	A	A	B	B	B	B	B	A	A	B	A	A	B	A	A	B	A	A	B	B	B	-	A	B	A	B	B	B	A	B	A	A	B	B	A	A	A
S1_73336334	1	73336334	179.087	A	A	A	A	A	A	B	B	A	A	A	-	B	B	B	B	A	A	B	A	A	B	-	A	B	A	A	B	B	B	B	A	B	A	B	B	B	A	B	A	A	B	B	A	A	A
S1_73355543	1	73355543	179.087	A	A	A	A	-	A	B	B	A	A	A	-	B	B	B	B	A	A	B	A	A	B	-	A	B	B	A	B	B	B	-	A	B	A	B	B	B	A	B	A	A	B	B	A	A	A
S1_73355559	1	73355559	179.087	A	A	A	A	-	A	B	B	A	A	A	-	B	B	B	B	A	A	B	A	A	B	-	A	B	B	A	B	B	B	A	A	B	A	B	B	B	A	B	A	A	B	B	A	A	A
S1_74530762_B	1	74530762	181.837	A	A	B	A	-	A	B	B	A	A	A	A	B	B	B	B	A	A	B	A	A	-	B	A	B	-	A	B	B	B	-	A	B	A	B	B	B	A	B	-	A	B	B	A	B	A
S1_74530777_B	1	74530777	181.837	A	A	B	A	-	A	B	B	A	A	A	A	B	B	B	B	A	A	B	A	A	-	B	A	B	-	A	B	B	B	-	A	B	A	B	B	B	A	B	-	A	B	B	A	B	A
S1_74788845_B	1	74788845	181.837	A	A	B	A	-	A	B	B	A	-	A	-	B	B	B	B	A	A	B	A	A	A	B	A	B	A	A	B	B	B	-	A	B	A	B	B	B	A	B	-	A	B	-	A	B	A
S1_74540011_B	1	74540011	182.358	A	A	B	A	A	A	B	B	A	-	A	-	B	B	B	B	A	A	B	A	A	-	-	A	B	A	A	B	B	B	-	A	B	A	B	B	B	A	B	-	A	B	B	A	B	A
S1_74548035	1	74548035	182.358	A	A	B	A	-	A	B	B	A	A	A	A	B	B	B	-	A	A	B	A	A	A	A	A	B	A	A	B	B	B	-	A	B	A	B	B	B	A	B	-	A	B	B	A	B	A
S1_74557966_B	1	74557966	182.874	A	A	B	A	B	A	B	B	A	-	A	-	B	B	B	B	A	A	B	A	A	-	A	A	B	A	A	B	B	B	B	A	B	A	B	B	B	A	B	A	A	B	-	A	B	A
S1_74558010_B	1	74558010	182.874	A	A	B	A	B	A	B	B	A	-	A	-	B	B	B	B	A	A	B	A	A	-	A	A	B	A	A	B	B	B	B	A	B	A	B	B	B	A	B	A	A	B	-	A	B	A
S1_74788741_B	1	74788741	183.384	A	A	B	A	-	A	B	B	A	-	A	A	B	B	B	B	A	A	B	A	A	-	A	A	B	A	A	B	B	B	B	A	B	A	B	B	B	A	B	A	A	B	-	A	B	A
S1_74788775_B	1	74788775	183.384	A	A	B	A	A	A	B	B	A	A	A	-	B	B	B	B	A	A	B	A	A	-	-	A	B	A	A	B	B	B	-	A	B	A	B	B	B	A	B	-	A	B	-	A	B	A
S1_74875765_B	1	74875765	183.384	A	A	B	A	-	A	B	B	A	-	A	-	B	B	B	B	A	A	B	A	A	-	A	A	B	A	A	B	B	B	-	A	B	A	B	B	B	A	B	A	A	B	A	A	B	A
S1_75372144	1	75372144	185.559	A	A	B	A	-	A	B	B	A	-	A	-	B	B	B	B	A	A	-	A	A	A	A	A	B	A	-	B	B	B	A	A	B	A	B	B	B	B	B	-	A	B	A	A	B	A
S1_75386742_B	1	75386742	185.559	A	A	B	A	B	A	B	B	A	-	A	-	B	B	B	B	A	A	B	A	A	A	A	A	B	A	A	B	B	B	-	A	B	A	B	B	B	B	B	A	A	B	A	A	B	A
S1_75386751	1	75386751	185.559	A	A	B	A	B	A	B	B	A	-	A	-	B	B	B	B	A	A	B	A	A	A	A	A	B	A	A	B	B	B	-	A	B	A	B	B	B	B	B	A	A	B	A	A	B	A
S1_75978458	1	75978458	190.117	A	A	B	A	-	A	B	B	A	-	A	A	B	B	B	B	A	A	A	A	A	A	A	A	B	B	A	B	B	B	-	A	B	A	B	A	B	-	B	-	A	B	A	A	B	A
S1_75978459	1	75978459	190.117	A	A	B	A	-	A	B	B	A	-	A	A	B	B	B	B	A	A	A	A	A	A	A	A	B	B	A	B	B	B	B	A	B	A	B	A	B	-	B	-	A	B	A	A	B	A
S1_76289027_B	1	76289027	190.117	A	A	B	A	-	A	B	B	A	-	A	-	B	B	B	B	A	A	-	A	A	-	-	A	B	B	A	B	B	B	B	A	B	A	B	A	B	-	B	-	A	B	A	A	B	A
S1_76289052	1	76289052	190.117	-	A	B	A	A	A	B	B	A	A	A	-	B	B	B	B	A	A	A	A	A	-	-	A	B	B	A	B	B	B	B	A	B	A	B	A	B	-	B	-	A	B	A	A	B	A
S1_76289053_B	1	76289053	190.117	A	A	B	A	-	A	B	B	A	-	A	-	B	B	B	B	A	A	-	A	A	-	-	A	B	B	A	B	B	B	B	A	B	A	B	A	B	-	B	-	A	B	A	A	B	A
S1_77660597_B	1	77660597	194.196	B	A	B	A	A	A	B	B	A	-	A	-	B	B	B	B	A	A	-	A	A	A	B	B	B	B	-	B	B	B	B	A	B	A	B	A	B	A	B	A	A	B	A	-	B	-
S1_77660638_B	1	77660638	194.196	B	A	B	A	A	A	B	B	A	-	A	-	B	B	B	B	A	A	-	A	A	A	B	B	B	B	-	B	B	B	B	A	B	A	B	A	B	A	B	A	A	B	A	-	B	-
S1_77671533_B	1	77671533	194.196	B	A	B	A	-	A	B	B	A	A	A	-	B	B	B	B	A	A	B	A	A	A	B	B	B	B	-	B	B	B	B	A	B	A	B	A	B	A	B	-	A	B	A	A	B	B
S1_78510519_B	1	78510519	200.036	B	A	B	A	A	A	B	B	A	-	A	A	B	B	B	B	A	A	B	A	B	A	B	B	B	B	A	B	B	B	B	A	B	A	A	A	A	A	B	B	A	B	A	-	B	A
S1_78645267_B	1	78645267	200.036	B	A	B	A	-	A	B	B	A	-	A	-	B	B	B	B	A	A	B	A	B	A	B	B	B	B	A	B	B	B	B	A	B	A	A	A	A	A	B	B	A	B	A	-	B	A
S1_78645282_B	1	78645282	200.036	B	A	B	A	-	A	B	B	A	-	A	-	B	B	B	B	A	A	B	A	B	A	B	B	B	B	A	B	B	B	B	A	B	A	A	A	A	A	B	B	A	B	A	-	B	A
S1_78798126_B	1	78798126	201.616	B	A	B	A	-	A	B	B	A	-	A	A	B	B	A	B	A	A	B	A	B	A	B	B	B	B	-	B	B	B	B	A	B	A	A	A	A	A	B	B	A	B	A	-	B	A
S1_78798127_B	1	78798127	201.616	B	A	B	A	-	A	B	B	A	-	A	A	B	B	A	B	A	A	B	A	B	A	B	B	B	B	-	B	B	B	B	A	B	A	A	A	A	A	B	B	A	B	A	-	B	A
S1_78798128_B	1	78798128	201.616	B	A	B	A	-	A	B	B	A	-	A	A	B	B	A	B	A	A	B	A	B	A	B	B	B	B	-	B	B	B	B	A	B	A	A	A	A	A	B	B	A	B	A	-	B	A
S1_78933239_B	1	78933239	202.68	B	A	B	A	-	A	B	B	A	A	A	-	B	B	B	B	A	A	B	A	B	-	B	B	B	B	-	B	B	B	B	A	B	A	A	A	A	A	B	B	A	B	A	A	B	A
S1_78933279_B	1	78933279	202.68	B	A	B	A	B	A	B	B	A	A	A	B	B	B	B	B	A	A	B	A	B	-	B	B	B	B	-	B	B	B	B	A	B	A	A	A	A	A	B	B	A	B	A	A	B	A
S1_78964208_B	1	78964208	202.68	B	A	B	A	-	A	B	B	A	A	A	B	B	B	B	B	A	A	B	A	B	-	B	B	B	B	-	B	B	B	B	A	B	A	A	A	A	A	B	B	A	B	A	-	B	A
S1_78971779_B	1	78971779	202.68	B	A	B	A	B	A	B	B	A	-	A	B	B	B	B	B	A	A	B	A	B	A	B	B	B	B	B	B	B	B	B	A	B	A	A	A	A	A	B	B	A	B	A	-	B	A
S1_79369154_B	1	79369154	206.018	B	B	B	A	A	A	B	B	A	-	A	A	B	B	B	B	A	A	B	A	B	A	B	B	B	B	A	B	B	B	B	A	B	A	A	A	A	-	B	B	A	B	A	-	B	A
S1_79401513_B	1	79401513	206.018	B	B	B	A	A	A	B	B	A	-	A	-	B	B	B	B	A	A	-	A	-	-	B	B	B	B	-	B	B	B	B	A	B	A	A	A	A	B	B	B	A	B	A	-	B	A
S1_79402389_B	1	79402389	206.539	B	B	B	A	A	A	B	B	A	A	A	-	B	B	B	B	A	A	A	A	B	-	B	B	B	B	-	B	B	B	B	A	B	A	A	A	A	B	B	B	A	B	A	-	B	A
S1_79402395_B	1	79402395	206.539	B	B	B	A	A	A	B	B	A	A	A	-	B	B	B	B	A	A	A	A	B	-	B	B	B	B	-	B	B	B	B	A	B	A	A	A	A	B	B	B	A	B	A	-	B	A
S1_79434626_B	1	79434626	206.539	B	B	B	A	A	A	B	B	A	-	A	A	B	B	B	B	A	A	A	A	-	-	B	B	B	B	A	B	B	B	B	A	B	A	A	A	A	-	B	B	A	B	A	B	B	A
S1_79434627_B	1	79434627	206.539	B	B	B	A	A	A	B	B	A	-	A	A	B	B	B	B	A	A	A	A	-	-	B	B	B	B	A	B	B	B	B	A	B	A	A	A	A	-	B	B	A	B	A	B	B	A
S1_79278926_B	1	79278926	207.57	B	B	B	A	A	A	B	B	A	A	A	-	B	B	B	B	A	A	B	A	B	B	B	B	B	B	-	B	B	B	B	A	B	A	A	A	A	B	B	B	A	B	A	B	B	A
S1_79278928_B	1	79278928	207.57	B	B	B	A	A	A	B	B	A	A	A	-	B	B	B	B	A	A	B	A	B	B	B	B	B	B	-	B	B	B	B	A	B	A	A	A	A	B	B	B	A	B	A	B	B	A
S1_79466678_B	1	79466678	207.57	B	B	B	A	-	A	B	B	A	A	A	-	B	B	B	B	A	A	-	A	B	B	B	B	B	B	-	B	B	B	B	A	B	A	A	A	A	-	B	B	A	B	A	B	B	A
S1_79368024_B	1	79368024	208.634	B	B	B	A	B	A	B	B	A	A	A	B	B	B	B	B	A	A	-	A	B	B	B	B	B	B	-	B	B	B	B	A	B	A	A	A	A	-	B	B	A	B	A	-	B	A
S1_79368045_B	1	79368045	208.634	B	B	B	A	B	A	B	B	A	A	A	B	B	B	B	B	A	A	-	A	B	B	B	B	B	B	-	B	B	B	B	A	B	A	A	A	A	-	B	B	A	B	A	-	B	A
S1_79402904_B	1	79402904	208.634	B	B	B	A	-	A	B	B	A	A	A	-	B	B	B	B	A	A	A	A	B	-	B	B	B	B	-	B	B	B	B	A	B	A	A	A	A	B	B	B	A	B	A	A	B	A
S1_79424163_B	1	79424163	209.676	B	B	B	A	B	A	B	B	A	A	A	B	B	B	B	B	A	A	B	A	B	-	B	B	B	B	B	B	B	B	B	A	B	A	A	A	A	B	B	B	A	B	A	A	B	A
S1_79424169_B	1	79424169	209.676	B	B	B	A	B	A	B	B	A	A	A	B	B	B	B	B	A	A	B	A	B	-	B	B	B	B	B	B	B	B	B	A	B	A	A	A	A	B	B	B	A	B	A	A	B	A
S1_79424172_B	1	79424172	209.676	B	B	B	A	B	A	B	B	A	A	A	B	B	B	B	B	A	A	B	A	B	-	B	B	B	B	B	B	B	B	B	A	B	A	A	A	A	B	B	B	A	B	A	A	B	A
S1_79424174_B	1	79424174	209.676	B	B	B	A	B	A	B	B	A	A	A	B	B	B	B	B	A	A	B	A	B	-	B	B	B	B	B	B	B	B	B	A	B	A	A	A	A	B	B	B	A	B	A	A	B	A
S1_80471178_B	1	80471178	216.537	B	B	B	A	A	A	B	B	B	A	B	-	B	B	B	B	A	A	B	A	-	A	B	B	B	B	A	B	B	B	B	A	B	B	A	A	A	A	B	B	A	B	A	A	B	A
S1_80476602_B	1	80476602	216.537	B	B	B	A	A	A	B	B	B	-	B	-	B	B	B	B	A	A	-	A	B	-	B	B	B	B	A	B	B	B	B	A	B	B	A	A	A	A	B	B	A	B	A	A	B	A
S1_80479389_B	1	80479389	216.537	B	B	B	A	A	A	B	B	B	A	B	-	B	B	B	B	A	A	-	A	-	A	B	B	B	B	A	B	B	B	B	A	B	B	A	A	A	A	B	B	A	B	A	A	B	A
S1_80616235_B	1	80616235	216.537	B	B	B	A	A	A	B	B	B	A	B	-	B	B	B	B	A	A	B	A	B	A	B	B	B	B	A	B	B	B	B	A	B	B	A	A	A	A	B	B	A	B	A	A	B	A
S1_80827297_B	1	80827297	216.537	B	B	B	A	A	A	B	B	B	-	B	B	B	B	B	B	A	A	-	A	B	A	B	B	B	B	A	B	B	B	B	A	B	B	A	A	A	A	B	B	A	B	A	A	B	A
S1_80684117_B	1	80684117	217.547	B	B	B	A	A	A	B	B	B	B	B	-	B	B	B	B	A	A	B	A	A	-	B	B	B	B	A	B	B	B	B	A	B	B	A	A	A	A	B	B	A	B	A	A	B	A
S1_80826978_B	1	80826978	217.547	B	B	B	A	A	A	B	B	B	-	B	-	B	B	B	B	A	A	-	A	-	B	B	B	B	B	A	B	B	B	B	A	B	B	A	A	A	A	B	B	A	B	A	A	B	-
S1_80826979_B	1	80826979	217.547	B	B	B	A	A	A	B	B	B	-	B	-	B	B	B	B	A	A	-	A	-	B	B	B	B	B	A	B	B	B	B	A	B	B	A	A	A	A	B	B	A	B	A	A	B	-
S2_1199928	2	1199928	0	A	A	A	B	A	A	A	A	B	B	B	A	B	B	A	B	A	A	B	A	A	B	B	A	B	B	B	B	B	B	A	B	-	A	B	B	A	A	A	A	A	-	B	-	A	A
S2_1199934	2	1199934	0	A	A	A	B	A	A	A	A	B	B	B	A	B	B	A	B	A	A	B	A	A	B	B	A	B	B	B	B	B	B	A	B	-	A	B	B	A	A	A	A	A	-	B	-	A	A
S2_1199949	2	1199949	0	A	A	A	B	A	A	A	A	B	B	B	A	B	B	A	B	A	A	B	A	A	B	B	A	B	B	B	B	B	B	A	B	-	A	B	B	A	A	A	A	A	A	B	-	A	A
S2_1199955	2	1199955	0	-	A	A	B	A	A	A	A	B	B	B	A	B	B	A	B	A	A	B	A	A	B	B	A	B	B	B	B	B	B	A	B	A	A	B	B	A	A	A	A	A	B	B	A	A	A
S2_1597571	2	1597571	1.563	A	A	A	B	A	A	A	A	-	B	B	A	B	B	A	B	A	A	B	A	A	B	B	A	B	B	B	B	B	B	A	B	-	A	B	B	A	A	A	A	A	-	B	-	A	A
S2_1597572	2	1597572	1.563	A	A	A	B	A	A	A	A	-	B	B	A	B	B	A	B	A	A	B	A	A	B	B	A	B	B	B	B	B	B	A	B	-	A	B	B	A	A	A	A	A	-	B	-	A	A
S2_1597573	2	1597573	1.563	A	A	A	B	A	A	A	A	-	B	B	A	B	B	A	B	A	A	B	A	A	B	B	A	B	B	B	B	B	B	A	B	-	A	B	B	A	A	A	A	A	-	B	-	A	A
S2_1826699_B	2	1826699	3.143	A	A	A	B	A	A	A	A	B	B	B	A	B	B	A	B	A	A	B	A	A	B	B	A	B	B	B	B	B	B	A	B	A	A	B	B	A	A	A	A	A	A	B	-	-	A
S2_1826702_B	2	1826702	3.143	A	A	A	B	A	A	A	A	B	B	B	A	B	B	A	B	A	A	B	A	A	B	B	A	B	B	B	B	B	B	A	B	A	A	B	B	A	A	A	A	A	A	B	-	-	A
S2_1829713	2	1829713	3.143	A	A	A	B	A	A	A	A	B	B	B	A	B	B	A	B	A	A	B	A	A	B	B	A	B	B	B	B	B	B	A	B	-	A	B	B	A	A	A	A	A	A	B	-	-	A
S2_2527943_B	2	2527943	8.216	A	A	A	B	A	B	A	A	B	B	B	A	B	B	A	B	A	A	B	A	A	B	B	A	B	B	A	B	B	B	A	-	A	A	B	B	A	A	A	A	A	-	B	A	-	A
S2_2527945_B	2	2527945	8.216	A	A	A	B	A	B	A	A	B	B	B	A	B	B	A	B	A	A	B	A	A	B	B	A	B	B	A	B	B	B	A	-	A	A	B	B	A	A	A	A	A	-	B	A	-	A
S2_2576038	2	2576038	8.216	A	A	A	B	A	B	A	A	B	B	B	A	B	B	A	B	A	A	B	A	A	B	B	A	B	B	A	B	B	-	A	A	A	A	B	B	A	A	A	A	A	-	B	A	-	A
S2_2488277	2	2488277	8.716	A	A	A	B	A	B	A	A	B	B	B	A	B	B	A	B	A	A	B	A	A	B	B	A	B	B	A	B	B	A	A	B	A	A	B	B	A	A	A	A	A	A	B	A	-	A
S2_2488279	2	2488279	8.716	A	A	A	B	A	B	A	A	B	B	B	A	B	B	A	B	A	A	B	A	A	B	B	A	B	B	A	B	B	A	A	B	A	A	B	B	A	A	A	A	A	A	B	A	-	A
S2_2488280	2	2488280	8.716	A	A	A	B	A	B	A	A	B	B	B	A	B	B	A	B	A	A	B	A	A	B	B	A	B	B	A	B	B	A	A	B	A	A	B	B	A	A	A	A	A	A	B	A	-	A
S2_2564037_B	2	2564037	10.279	A	A	A	B	A	B	A	A	B	B	B	A	B	B	A	B	A	A	B	A	A	B	B	A	B	B	A	B	B	B	A	-	-	A	B	B	A	A	A	A	A	-	B	-	-	A
S2_2596111_B	2	2596111	10.279	A	A	A	B	A	B	A	A	B	B	B	A	B	B	A	B	A	A	B	A	A	B	B	A	B	B	A	B	B	-	A	B	A	A	B	B	A	A	A	A	A	A	B	-	B	A
S2_2765176_B	2	2765176	10.279	A	A	A	B	A	B	A	A	B	B	B	A	B	B	A	B	A	A	B	A	A	B	B	A	B	B	A	B	B	-	A	B	-	A	B	B	A	-	A	A	A	A	B	-	-	A
S2_3059987_B	2	3059987	11.876	A	A	A	B	A	A	A	A	B	B	A	B	B	B	A	B	A	A	B	A	A	B	B	A	B	B	A	B	B	B	A	-	A	A	B	B	A	A	A	A	A	-	B	B	B	A
S2_3060006_B	2	3060006	11.876	A	A	A	B	A	A	A	A	B	B	A	B	B	B	A	B	A	A	B	A	A	B	B	A	B	B	A	B	B	B	A	-	A	A	B	B	A	A	A	A	A	-	B	B	B	A
S2_3060019_B	2	3060019	11.876	A	A	A	B	A	A	A	A	B	B	A	B	B	B	A	B	A	A	B	A	A	B	B	A	B	B	A	B	B	B	A	-	A	A	B	B	A	A	A	A	A	-	B	B	B	A
S2_3060020_B	2	3060020	11.876	A	A	A	B	A	A	A	A	B	B	A	B	B	B	A	B	A	A	B	A	A	B	B	A	B	B	A	B	B	B	A	-	A	A	B	B	A	A	A	A	A	-	B	B	B	A
S2_3060021_B	2	3060021	11.876	A	A	A	B	A	A	A	A	B	B	A	B	B	B	A	B	A	A	B	A	A	B	B	A	B	B	A	B	B	B	A	-	A	A	B	B	A	A	A	A	A	-	B	B	B	A
S2_3807154_B	2	3807154	16.837	A	A	A	B	A	A	A	A	B	B	A	B	A	A	A	B	A	A	-	A	A	B	B	A	B	B	B	B	-	-	A	B	A	A	B	B	A	B	A	A	A	B	A	B	B	A
S2_3807179_B	2	3807179	16.837	A	A	A	B	A	A	A	A	B	B	A	B	A	A	A	B	A	A	-	A	A	B	B	A	B	B	B	B	-	-	A	B	A	A	B	B	A	B	A	A	A	B	A	B	B	A
S2_3807180_B	2	3807180	16.837	A	A	A	B	A	A	A	A	B	B	A	B	A	A	A	B	A	A	-	A	A	B	B	A	B	B	B	B	-	-	A	B	A	A	B	B	A	B	A	A	A	B	A	B	B	A
S2_3879285	2	3879285	16.837	A	A	A	B	A	A	A	A	B	B	A	B	A	A	A	B	A	A	-	A	A	B	B	A	B	B	B	B	B	A	A	B	A	A	B	B	A	B	A	A	A	-	A	B	B	A
S2_3879749_B	2	3879749	16.837	A	A	A	B	A	-	A	A	B	B	A	B	A	A	A	B	A	A	A	A	A	B	B	A	B	B	B	B	-	A	A	-	A	A	B	B	A	B	A	A	A	B	A	B	B	A
S2_3881063	2	3881063	17.817	A	A	A	B	A	A	A	A	B	B	A	B	A	A	A	B	A	A	A	A	A	B	B	A	B	B	B	B	-	A	A	B	A	A	B	B	A	B	A	A	A	-	A	B	B	A
S2_3881066	2	3881066	17.817	A	A	A	B	A	A	A	A	B	B	A	B	A	A	A	B	A	A	A	A	A	B	B	A	B	B	B	B	-	A	A	B	A	A	B	B	A	B	A	A	A	-	A	B	B	A
S2_3881068	2	3881068	17.817	A	A	A	B	A	A	A	A	B	B	A	B	A	A	A	B	A	A	A	A	A	B	B	A	B	B	B	B	-	A	A	B	A	A	B	B	A	B	A	A	A	-	A	B	B	A
S2_3881121	2	3881121	17.817	A	A	A	B	A	A	A	A	B	B	A	B	A	A	A	B	A	A	A	A	A	B	B	A	B	B	B	B	-	A	A	B	A	A	B	B	A	B	A	A	A	-	A	B	B	A
S2_4363227	2	4363227	20.397	A	A	A	B	A	A	A	A	B	B	A	B	A	A	A	B	A	A	A	A	A	B	B	A	B	B	B	B	A	B	A	-	A	A	B	B	A	B	A	A	A	A	-	B	B	B
S2_4363228	2	4363228	20.397	A	A	A	B	A	A	A	A	B	B	A	B	A	A	A	B	A	A	A	A	A	B	B	A	B	B	B	B	A	B	A	-	A	A	B	B	A	B	A	A	A	A	-	B	B	B
S2_4431020	2	4431020	20.397	A	A	A	B	A	A	A	A	B	B	A	B	A	A	A	B	A	A	A	A	A	B	B	A	B	B	B	B	A	B	A	B	A	A	B	B	A	B	A	A	A	-	-	B	-	B
S2_4270854	2	4270854	21.897	A	A	A	B	A	A	A	A	B	B	A	B	A	A	A	B	A	A	A	A	A	B	B	A	B	B	B	B	A	B	A	B	A	A	B	B	A	B	A	A	A	-	B	B	B	B
S2_4270879	2	4270879	21.897	A	A	A	B	A	A	A	A	B	B	A	B	A	A	A	B	A	A	A	A	A	B	B	A	B	B	B	B	A	B	A	B	A	A	B	B	A	B	A	A	A	-	B	B	B	B
S2_4270896	2	4270896	21.897	A	A	A	B	A	A	A	A	B	B	A	B	A	A	A	B	A	A	-	A	A	B	B	A	B	B	B	B	A	B	A	B	A	A	B	B	A	B	A	A	A	-	-	B	B	B
S2_4419203_B	2	4419203	23.919	A	A	A	B	A	-	A	A	B	B	A	B	A	A	A	B	A	A	-	A	A	B	B	A	B	B	B	B	A	B	A	B	A	A	B	B	A	B	A	A	A	B	B	B	-	B
S2_4426633_B	2	4426633	23.919	A	A	A	B	A	-	A	A	B	B	A	B	A	A	A	B	A	A	B	A	A	B	B	A	B	B	B	B	A	B	A	B	A	A	B	B	A	B	A	A	A	B	B	B	B	B
S2_4426662_B	2	4426662	23.919	A	A	A	B	A	-	A	A	B	B	A	B	A	A	A	B	A	A	B	A	A	B	B	A	B	B	B	B	A	B	A	B	A	A	B	B	A	B	A	A	A	B	B	B	B	B
S2_4431006	2	4431006	23.919	A	A	A	B	A	A	A	A	B	B	A	B	A	A	A	B	A	A	A	A	A	B	B	A	B	B	B	B	A	B	A	B	A	A	B	B	A	B	A	A	A	-	-	B	-	B
S2_4903975_B	2	4903975	25.982	A	A	A	B	A	A	A	A	B	B	A	B	A	A	A	B	A	A	-	A	B	B	B	A	B	B	B	B	A	B	A	-	A	A	B	B	A	B	A	A	A	A	A	B	-	B
S2_4903979_B	2	4903979	25.982	A	A	A	B	A	A	A	A	B	B	A	B	A	A	A	B	A	A	-	A	B	B	B	A	B	B	B	B	A	B	A	-	A	A	B	B	A	B	A	A	A	A	A	B	-	B
S2_4904003_B	2	4904003	25.982	A	A	A	B	A	A	A	A	B	B	A	B	A	A	A	B	A	A	-	A	B	B	B	A	B	B	B	B	A	B	A	-	A	A	B	B	A	B	A	A	A	A	A	B	-	B
S2_6036366_B	2	6036366	30.943	A	A	A	B	A	B	A	A	B	B	A	B	A	A	A	B	A	A	-	A	B	B	A	A	B	B	B	B	B	B	A	A	A	-	B	B	A	B	A	A	A	A	-	B	B	B
S2_6036380_B	2	6036380	30.943	A	A	A	B	A	B	A	A	B	B	A	B	A	A	A	B	A	A	-	A	B	B	A	A	B	B	B	B	B	B	A	A	A	-	B	B	A	B	A	A	A	A	-	B	B	B
S2_6036388_B	2	6036388	30.943	A	A	A	B	A	B	A	A	B	B	A	B	A	A	A	B	A	A	-	A	B	B	A	A	B	B	B	B	B	B	A	A	A	-	B	B	A	B	A	A	A	A	-	B	B	B
S2_6068831_B	2	6068831	30.943	A	A	A	B	A	-	A	A	B	B	A	B	A	A	A	B	A	A	A	A	B	B	A	A	B	B	B	B	-	B	A	A	A	-	B	B	A	B	A	A	A	A	A	B	B	B
S2_6068832_B	2	6068832	30.943	A	A	A	B	A	-	A	A	B	B	A	B	A	A	A	B	A	A	A	A	B	B	A	A	B	B	B	B	-	B	A	A	A	-	B	B	A	B	A	A	A	A	A	B	B	B
S2_5785712_B	2	5785712	31.953	A	A	-	B	A	B	A	A	B	B	A	B	A	A	A	B	A	A	A	A	B	B	A	A	B	B	B	B	A	B	A	A	A	-	B	B	A	B	A	A	A	A	A	B	B	B
S2_6019749_B	2	6019749	31.953	A	A	A	B	A	-	A	A	B	B	A	B	A	A	A	B	A	A	A	A	B	B	A	A	B	B	B	B	A	B	A	A	A	A	B	B	A	B	A	A	A	A	-	B	B	B
S2_6019751	2	6019751	31.953	A	A	A	B	A	-	A	A	B	B	A	B	A	A	A	B	A	A	A	A	B	B	A	A	B	B	B	B	A	B	A	A	A	A	B	B	A	B	A	A	A	A	-	B	B	B
S2_6036251_B	2	6036251	31.953	A	A	A	B	A	-	A	A	B	B	A	B	A	A	A	B	A	A	-	A	B	B	A	A	B	B	B	B	A	B	A	A	A	-	B	B	A	B	A	A	A	A	-	B	B	B
S2_5705860	2	5705860	32.458	A	A	A	B	A	A	A	A	B	B	A	A	A	A	A	B	A	A	-	A	B	B	A	A	B	B	B	B	A	B	A	A	A	-	B	B	A	B	A	A	A	A	B	B	B	B
S2_5814382_B	2	5814382	32.458	A	A	A	B	A	-	A	A	B	B	A	-	A	A	A	B	A	A	-	A	B	B	A	A	B	B	B	B	A	B	A	A	A	-	B	B	A	B	A	A	A	A	-	B	B	B
S2_6018800	2	6018800	32.458	A	A	A	B	A	-	A	A	B	B	A	-	A	A	A	B	A	A	-	A	B	-	A	A	B	B	B	B	A	B	A	A	A	A	B	B	A	B	A	A	A	A	-	B	B	B
S2_5869926	2	5869926	32.963	A	A	A	B	A	A	A	A	B	B	A	B	A	A	A	B	A	A	-	A	B	B	A	A	B	B	B	B	-	B	A	A	A	-	B	B	A	B	A	A	A	A	-	B	B	B
S2_5987318	2	5987318	32.963	A	A	A	B	A	-	A	A	B	B	A	B	A	A	A	B	A	A	-	A	B	B	A	A	B	B	B	B	A	B	A	A	A	B	B	B	A	B	A	A	A	A	-	B	B	B
S2_6004897	2	6004897	32.963	A	A	A	B	A	-	A	A	B	B	A	B	A	A	A	B	A	A	-	A	B	B	A	A	B	B	B	B	A	B	A	A	A	-	B	B	A	B	A	A	A	A	-	B	B	B
S2_5768792	2	5768792	33.974	A	A	A	B	A	A	A	A	B	B	A	B	A	A	A	B	A	A	A	A	B	B	A	A	B	B	B	B	-	B	A	A	A	A	B	B	A	B	A	A	A	A	-	B	B	B
S2_5814449_B	2	5814449	33.974	A	A	A	B	A	-	A	A	B	B	A	-	A	A	A	B	A	A	A	A	B	B	A	A	B	B	B	B	-	B	A	A	A	-	B	B	A	B	A	A	A	A	-	B	B	B
S2_5824418_B	2	5824418	33.974	A	A	A	B	A	A	A	A	B	B	A	B	A	A	A	B	A	A	-	A	B	B	A	A	B	B	B	B	A	B	A	A	A	-	B	B	A	B	A	A	A	A	B	B	B	B
S2_5838386	2	5838386	33.974	A	A	A	B	A	A	A	A	B	B	A	-	A	A	A	B	A	A	A	A	B	B	A	A	B	B	B	B	A	B	A	A	A	A	B	B	A	B	A	A	A	A	-	B	B	B
S2_6042244_B	2	6042244	34.479	A	A	A	B	A	A	A	A	B	B	A	A	A	A	A	B	A	A	A	A	B	B	A	A	B	B	B	B	-	B	A	A	A	-	B	B	A	B	A	A	A	A	B	B	B	B
S2_6045380_B	2	6045380	34.479	A	A	A	B	A	-	A	A	B	B	A	A	A	A	A	B	A	A	A	A	B	B	A	A	B	B	B	B	-	B	A	A	A	B	B	B	A	B	A	A	A	A	B	B	B	B
S2_6045381_B	2	6045381	34.479	A	A	A	B	A	-	A	A	B	B	A	A	A	A	A	B	A	A	A	A	B	B	A	A	B	B	B	B	-	B	A	A	A	B	B	B	A	B	A	A	A	A	B	B	B	B
S2_6045383_B	2	6045383	34.479	A	A	A	B	A	-	A	A	B	B	A	A	A	A	A	B	A	A	A	A	B	B	A	A	B	B	B	B	-	B	A	A	A	B	B	B	A	B	A	A	A	A	B	B	B	B
S2_6135902_B	2	6135902	35.499	A	A	A	B	A	A	A	A	B	B	A	-	A	A	A	B	A	A	A	A	B	B	A	A	B	B	B	B	A	B	A	A	A	A	B	B	A	B	A	A	A	A	-	B	B	B
S2_6139782_B	2	6139782	35.499	A	A	A	B	A	A	A	A	B	B	A	-	A	A	A	B	A	A	A	A	B	B	A	A	B	B	B	B	A	B	A	A	A	A	B	B	A	B	A	A	A	A	-	B	B	B
S2_6183093_B	2	6183093	35.499	A	A	A	B	A	A	A	A	B	B	A	B	A	A	A	B	A	A	A	A	B	B	A	A	B	B	B	B	A	B	A	A	A	-	B	B	A	B	A	A	A	A	-	B	B	B
S2_6755297_B	2	6755297	36.53	A	A	A	B	A	-	A	A	B	B	A	B	A	A	A	B	A	A	A	A	B	B	A	A	B	B	B	B	-	B	A	A	A	B	B	B	A	B	A	A	A	A	B	B	B	B
S2_6755754_B	2	6755754	36.53	A	A	A	B	A	-	A	A	B	B	A	-	A	A	A	B	A	A	A	A	B	B	A	A	B	B	B	B	A	B	A	A	A	B	B	B	A	B	A	A	A	A	-	B	B	B
S2_6755757_B	2	6755757	36.53	A	A	A	B	A	-	A	A	B	B	A	-	A	A	A	B	A	A	A	A	B	B	A	A	B	B	B	B	A	B	A	A	A	B	B	B	A	B	A	A	A	A	-	B	B	B
S2_6755759_B	2	6755759	36.53	A	A	A	B	A	-	A	A	B	B	A	-	A	A	A	B	A	A	A	A	B	B	A	A	B	B	B	B	A	B	A	A	A	B	B	B	A	B	A	A	A	A	-	B	B	B
S2_6755773_B	2	6755773	36.53	A	A	A	B	A	-	A	A	B	B	A	-	A	A	A	B	A	A	A	A	B	B	A	A	B	B	B	B	A	B	A	A	A	B	B	B	A	B	A	A	A	A	-	B	B	B
S2_7984157	2	7984157	39.692	A	A	B	B	A	A	A	A	B	B	A	-	A	A	B	B	A	A	A	A	B	B	A	A	B	B	B	B	-	B	A	A	A	B	B	B	A	B	A	A	A	A	A	B	B	B
S2_7984168	2	7984168	39.692	A	A	B	B	A	A	A	A	B	B	A	-	A	A	B	B	A	A	A	A	B	B	A	A	B	B	B	B	-	B	A	A	A	B	B	B	A	B	A	A	A	A	A	B	B	B
S2_7984170	2	7984170	39.692	A	A	B	B	A	A	A	A	B	B	A	-	A	A	B	B	A	A	A	A	B	B	A	A	B	B	B	B	-	B	A	A	A	B	B	B	A	B	A	A	A	A	A	B	B	B
S2_8332126	2	8332126	39.692	A	A	B	B	A	A	A	A	B	B	A	A	A	A	B	B	A	A	A	A	B	B	A	A	B	B	B	B	A	B	A	A	A	B	B	B	A	B	A	A	A	A	-	B	B	B
S2_7876710_B	2	7876710	40.183	A	A	B	B	A	A	A	A	B	B	A	-	A	A	B	B	A	A	-	A	B	B	A	A	B	B	B	B	A	B	A	A	A	B	B	B	A	B	A	A	A	A	A	B	B	B
S2_7876711_B	2	7876711	40.183	A	A	B	B	A	A	A	A	B	B	A	-	A	A	B	B	A	A	-	A	B	B	A	A	B	B	B	B	A	B	A	A	A	B	B	B	A	B	A	A	A	A	A	B	B	B
S2_7883415_B	2	7883415	40.183	A	A	B	B	A	A	A	A	B	B	A	-	A	A	B	B	A	A	-	A	B	B	A	A	B	B	B	B	A	B	A	A	A	B	B	B	A	B	A	A	A	A	A	B	B	B
S2_7958255_B	2	7958255	41.668	A	A	B	B	A	A	A	A	B	B	A	A	A	A	B	B	A	A	-	A	B	B	A	A	B	B	B	B	B	B	A	A	A	B	B	B	A	B	A	A	A	A	-	B	B	B
S2_7976415_B	2	7976415	41.668	A	A	B	B	A	A	A	A	B	B	A	-	A	A	B	B	A	A	-	A	B	B	A	A	B	B	B	B	B	B	A	A	A	B	B	B	A	B	A	A	A	A	A	B	B	B
S2_7976436_B	2	7976436	41.668	A	A	B	B	A	A	A	A	B	B	A	-	A	A	B	B	A	A	-	A	B	B	A	A	B	B	B	B	B	B	A	A	A	B	B	B	A	B	A	A	A	A	A	B	B	B
S2_7976437_B	2	7976437	41.668	A	A	B	B	A	A	A	A	B	B	A	-	A	A	B	B	A	A	-	A	B	B	A	A	B	B	B	B	B	B	A	A	A	B	B	B	A	B	A	A	A	A	A	B	B	B
S2_7976438_B	2	7976438	41.668	A	A	B	B	A	A	A	A	B	B	A	-	A	A	B	B	A	A	-	A	B	B	A	A	B	B	B	B	B	B	A	A	A	B	B	B	A	B	A	A	A	A	A	B	B	B
S2_8092054_B	2	8092054	42.668	A	A	B	B	A	A	A	A	B	B	A	-	A	A	B	B	A	A	-	A	B	B	A	A	B	B	B	B	A	B	A	A	A	B	B	B	A	B	A	A	A	A	-	B	B	B
S2_8092432_B	2	8092432	42.668	A	A	B	B	A	A	A	-	B	B	A	B	A	A	B	B	A	A	-	A	B	B	A	A	B	B	B	B	-	B	A	A	A	B	B	B	A	B	A	A	A	A	-	B	B	B
S2_8341038_B	2	8341038	42.668	A	A	B	B	A	A	A	A	B	B	A	A	A	A	B	B	A	A	A	A	B	B	A	A	B	B	B	B	A	B	A	A	A	B	B	B	A	B	A	A	A	A	B	B	B	B
S2_8341085_B	2	8341085	42.668	A	A	B	B	A	A	A	-	B	B	A	-	A	A	B	B	A	A	A	A	B	B	A	A	B	B	B	B	A	B	A	A	A	B	B	B	A	B	A	A	A	A	-	B	B	B
S2_8409633_B	2	8409633	42.668	A	A	B	B	A	A	A	-	B	B	A	B	A	A	B	B	A	A	-	A	B	B	A	A	B	B	B	B	A	B	A	A	A	B	B	B	A	B	A	A	A	A	B	B	B	B
S2_8451031_B	2	8451031	44.215	A	A	B	B	A	A	A	A	B	B	A	-	B	B	B	B	A	A	-	A	B	B	A	A	B	B	B	B	-	B	A	A	A	B	B	B	A	B	A	A	A	A	B	B	B	B
S2_8451069_B	2	8451069	44.215	A	A	B	B	A	A	A	A	B	B	A	-	B	B	B	B	A	A	-	A	B	B	A	A	B	B	B	B	B	B	A	A	A	B	B	B	A	B	A	A	A	A	B	B	B	B
S2_8451089_B	2	8451089	44.215	A	A	B	B	A	A	A	A	B	B	A	-	B	B	B	B	A	A	-	A	B	B	A	A	B	B	B	B	-	B	A	A	A	B	B	B	A	B	A	A	A	A	-	B	B	B
S2_9134091_B	2	9134091	46.322	A	A	B	B	A	A	A	-	B	B	A	B	B	B	B	B	-	B	-	A	B	B	A	A	B	B	B	B	-	B	A	A	A	B	A	B	A	B	A	A	A	A	-	B	B	B
S2_9134193_B	2	9134193	46.322	A	A	B	-	A	A	A	-	B	B	A	B	B	B	B	B	-	B	A	A	B	B	A	A	B	B	B	B	-	B	A	A	A	B	A	B	A	B	A	A	A	A	B	B	B	B
S2_9150367_B	2	9150367	46.322	A	A	B	B	A	A	A	A	B	B	A	B	B	B	B	B	B	B	-	A	B	B	A	A	B	B	B	B	A	B	A	A	A	B	A	B	A	B	A	A	A	A	-	B	B	B
S2_9180242_B	2	9180242	46.322	A	A	B	B	A	A	A	A	B	B	A	-	B	B	B	B	-	B	-	A	B	B	A	A	B	B	B	B	A	B	A	A	A	B	A	B	A	B	A	A	A	A	-	B	B	B
S2_9305195_B	2	9305195	46.832	A	A	B	B	A	A	A	B	B	B	A	-	B	B	B	B	A	B	-	A	B	B	A	A	B	B	B	B	A	B	A	A	A	B	A	B	A	B	A	A	A	A	-	B	B	B
S2_9445919_B	2	9445919	46.832	A	A	B	B	A	A	A	-	B	B	A	-	B	B	B	B	A	-	-	A	B	B	A	A	B	B	B	B	A	B	A	A	A	B	A	B	A	B	A	A	A	A	-	B	B	B
S2_9496177_B	2	9496177	46.832	A	A	B	B	A	A	A	-	B	B	A	A	B	B	B	B	A	B	A	A	B	B	A	A	B	B	B	B	-	B	A	A	A	B	A	B	A	B	A	A	A	A	-	B	B	B
S2_9496192_B	2	9496192	46.832	A	A	B	B	A	A	A	-	B	B	A	A	B	B	B	B	A	B	A	A	B	B	A	A	B	B	B	B	-	B	A	A	A	B	A	B	A	B	A	A	A	A	-	B	B	B
S2_11549845_B	2	11549845	51.963	A	B	B	B	A	A	A	A	B	A	A	A	B	B	B	B	-	B	-	A	B	B	A	A	B	B	-	B	A	B	A	A	A	A	A	B	A	B	B	A	A	A	-	B	B	B
S2_11228463_B	2	11228463	52.995	-	B	B	B	A	A	A	B	B	A	A	A	B	B	B	B	B	B	-	A	B	B	A	A	B	B	A	B	A	B	A	A	A	A	A	B	A	B	A	A	A	A	-	B	B	B
S2_11534484_B	2	11534484	52.995	A	B	B	B	A	A	A	-	B	A	A	A	B	B	B	B	B	B	-	A	B	B	A	A	B	B	-	B	A	B	A	A	A	A	A	B	A	B	-	A	A	A	A	B	B	B
S2_12196051_B	2	12196051	55.601	B	B	B	B	A	A	A	-	B	A	A	A	B	B	B	B	A	B	A	A	B	B	A	A	B	B	-	B	A	B	A	A	A	A	A	B	B	B	A	A	A	A	B	B	B	B
S2_12674894_B	2	12674894	55.601	-	B	B	B	A	A	A	A	B	A	A	A	B	B	B	B	-	B	A	A	B	B	A	A	B	B	A	B	A	B	A	A	A	A	A	B	B	B	A	A	A	A	-	B	B	B
S2_12674938	2	12674938	55.601	-	B	B	B	A	A	A	A	B	A	A	A	B	B	B	B	-	B	A	A	B	B	A	A	B	B	A	B	A	B	A	A	A	A	A	B	B	B	A	A	A	A	-	B	B	B
S2_12674939	2	12674939	55.601	-	B	B	B	A	A	A	A	B	A	A	A	B	B	B	B	-	B	A	A	B	B	A	A	B	B	A	B	A	B	A	A	A	A	A	B	B	B	A	A	A	A	-	B	B	B
S2_12509279_B	2	12509279	56.106	B	B	B	B	A	A	A	-	B	A	A	A	B	B	B	B	B	B	A	A	B	B	-	A	B	B	-	B	A	B	A	A	A	A	A	B	B	B	A	A	A	A	B	B	B	B
S2_12509292_B	2	12509292	56.106	B	B	B	B	A	A	A	-	B	A	A	A	B	B	B	B	B	B	A	A	B	B	-	A	B	B	-	B	A	B	A	A	A	A	A	B	B	B	A	A	A	A	B	B	B	B
S2_12734125_B	2	12734125	56.106	B	B	B	B	A	A	A	A	B	A	A	A	B	B	B	B	B	B	A	A	B	B	-	A	B	B	-	B	A	B	A	A	A	A	A	B	B	B	A	A	A	A	B	B	B	B
S2_12734162_B	2	12734162	56.106	B	B	B	B	A	A	A	A	B	A	A	A	B	B	B	B	B	B	A	A	B	B	-	A	B	B	-	B	A	B	A	A	A	A	A	B	B	B	A	A	A	A	B	B	B	B
S2_12734165_B	2	12734165	56.106	B	B	B	B	A	A	A	A	B	A	A	A	B	B	B	B	B	B	A	A	B	B	-	A	B	B	-	B	A	B	A	A	A	A	A	B	B	B	A	A	A	A	B	B	B	B
S2_12326086_B	2	12326086	56.616	B	B	B	B	A	A	A	-	B	A	A	A	B	B	B	B	-	B	A	A	B	B	-	A	B	B	A	B	A	B	A	A	A	A	A	B	B	B	-	A	A	A	A	B	B	B
S2_12326125_B	2	12326125	56.616	B	B	B	B	A	A	A	-	B	A	A	A	B	B	B	B	-	B	A	A	B	B	-	A	B	B	-	B	A	B	A	A	A	A	A	B	B	B	-	A	A	A	-	B	B	B
S2_12371833_B	2	12371833	56.616	B	B	B	B	A	A	A	-	B	A	A	A	B	B	B	B	A	B	A	A	B	B	-	A	B	B	-	B	A	B	A	A	A	A	A	B	B	B	-	A	A	A	-	B	B	B
S2_12735203_B	2	12735203	56.616	B	B	B	B	A	A	A	-	B	A	A	A	B	B	B	B	A	B	A	A	B	B	-	A	B	B	-	B	A	B	A	A	A	A	A	B	B	B	B	A	A	A	A	B	B	B
S2_12991743_B	2	12991743	57.132	B	B	B	B	A	A	A	A	B	A	A	A	B	B	B	B	-	B	A	A	B	B	-	A	B	B	A	B	B	B	A	A	A	A	A	B	B	B	B	A	A	A	-	B	B	B
S2_12991758_B	2	12991758	57.132	B	B	B	B	A	A	A	A	B	A	A	A	B	B	B	B	-	B	A	A	B	B	-	A	B	B	A	B	B	B	A	A	A	A	A	B	B	B	B	A	A	A	-	B	B	B
S2_13040196_B	2	13040196	57.132	B	B	B	B	A	A	A	-	B	A	A	A	B	B	B	B	B	B	A	A	B	B	-	A	B	B	A	B	B	B	A	A	A	A	A	B	B	B	B	A	A	A	-	B	B	B
S2_13040225_B	2	13040225	57.132	B	B	B	B	A	A	A	-	B	A	A	A	B	B	B	B	-	B	A	A	B	B	A	A	B	B	A	B	B	B	A	A	A	A	A	B	B	B	B	A	A	A	-	B	B	B
S2_13040253_B	2	13040253	57.132	B	B	B	B	A	A	A	A	B	A	A	A	B	B	B	B	A	B	A	A	B	B	A	A	B	B	A	B	B	B	A	A	A	A	A	B	B	B	B	A	A	A	A	B	B	B
S2_13177158_B	2	13177158	57.132	-	B	B	B	A	A	A	-	B	A	A	A	B	B	B	B	B	B	A	A	B	B	B	A	B	B	A	B	B	B	A	A	A	A	A	B	B	B	B	A	A	A	B	B	B	B
S2_13177160_B	2	13177160	57.132	-	B	B	B	A	A	A	-	B	A	A	A	B	B	B	B	B	B	A	A	B	B	B	A	B	B	A	B	B	B	A	A	A	A	A	B	B	B	B	A	A	A	B	B	B	B
S2_13177824_B	2	13177824	57.132	B	B	B	B	A	A	A	A	B	A	A	A	B	B	B	B	B	B	A	A	B	B	-	A	B	B	A	B	B	B	A	A	A	A	A	B	B	B	B	A	A	A	-	B	B	B
S2_13228986_B	2	13228986	57.132	-	B	B	B	A	A	A	A	B	A	A	A	B	B	B	B	-	B	A	A	B	B	-	A	B	B	-	B	B	B	A	A	A	A	A	B	B	B	B	A	A	A	-	B	B	B
S2_13228988_B	2	13228988	57.132	-	B	B	B	A	A	A	A	B	A	A	A	B	B	B	B	-	B	A	A	B	B	-	A	B	B	-	B	B	B	A	A	A	A	A	B	B	B	B	A	A	A	-	B	B	B
S2_13228991_B	2	13228991	57.132	-	B	B	B	A	A	A	A	B	A	A	A	B	B	B	B	-	B	A	A	B	B	-	A	B	B	-	B	B	B	A	A	A	A	A	B	B	B	B	A	A	A	-	B	B	B
S2_13230459_B	2	13230459	57.132	B	B	B	B	A	A	A	A	B	A	A	A	B	B	B	B	A	B	A	A	B	B	B	A	B	B	-	B	B	B	A	A	A	A	A	B	B	B	B	A	A	A	A	B	B	B
S2_13271308_B	2	13271308	57.132	-	B	B	B	A	A	A	-	B	A	A	A	B	B	B	B	-	B	A	A	B	B	-	A	B	B	-	B	B	B	A	A	A	A	A	B	B	B	B	A	A	A	B	B	B	B
S2_13509820_B	2	13509820	57.132	B	B	B	B	A	A	A	A	B	A	A	A	B	B	B	B	A	B	A	A	B	B	-	A	B	B	-	B	B	B	A	A	A	A	A	B	B	B	B	A	A	A	A	B	B	B
S2_13744259_B	2	13744259	58.163	B	B	B	B	A	A	A	B	B	A	A	A	B	B	B	B	B	B	A	A	B	B	B	A	B	B	B	B	B	B	A	B	A	A	A	B	B	B	B	A	A	A	B	B	B	B
S2_13744262_B	2	13744262	58.163	B	B	B	B	A	A	A	B	B	A	A	A	B	B	B	B	B	B	A	A	B	B	B	A	B	B	B	B	B	B	A	B	A	A	A	B	B	B	B	A	A	A	B	B	B	B
S2_13744298_B	2	13744298	58.163	B	B	B	B	A	A	A	B	B	A	A	A	B	B	B	B	B	B	A	A	B	B	B	A	B	B	B	B	B	B	A	B	A	A	A	B	B	B	B	A	A	A	B	B	B	B
S2_16612013_B	2	16612013	59.153	B	B	B	B	A	A	A	-	B	A	A	A	B	B	B	B	-	B	A	A	B	B	B	A	B	B	-	B	B	B	A	B	A	A	A	B	B	B	B	A	A	A	A	B	B	B
S2_16814404_B	2	16814404	59.153	B	B	B	B	A	A	A	A	B	A	A	A	B	B	B	B	-	B	A	A	B	B	B	A	B	B	B	B	B	-	A	B	A	A	A	B	B	B	B	A	A	A	A	B	B	B
S2_16814409_B	2	16814409	59.153	B	B	B	B	A	A	A	A	B	A	A	A	B	B	B	B	-	B	A	A	B	B	B	A	B	B	B	B	B	-	A	B	A	A	A	B	B	B	B	A	A	A	A	B	B	B
S2_16852908_B	2	16852908	60.767	-	B	B	B	A	A	A	-	B	A	A	A	B	B	B	B	-	B	A	A	B	A	-	A	B	B	A	B	B	-	A	B	-	A	A	B	B	B	B	A	A	A	-	B	B	B
S2_16852910_B	2	16852910	60.767	-	B	B	B	A	A	A	-	B	A	A	A	B	B	B	B	-	B	A	A	B	A	-	A	B	B	A	B	B	-	A	B	-	A	A	B	B	B	B	A	A	A	-	B	B	B
S2_16852911_B	2	16852911	60.767	-	B	B	B	A	A	A	-	B	A	A	A	B	B	B	B	-	B	A	A	B	A	-	A	B	B	A	B	B	-	A	B	-	A	A	B	B	B	B	A	A	A	-	B	B	B
S2_17761094_B	2	17761094	60.767	B	B	B	B	A	A	A	-	B	A	A	A	B	B	-	B	-	B	A	A	B	A	B	A	B	B	A	B	B	B	A	B	-	A	A	B	B	B	B	A	A	A	-	B	B	B
S2_17761104_B	2	17761104	60.767	B	B	B	B	A	A	A	-	B	A	A	A	B	B	-	B	-	B	A	A	B	A	B	A	B	B	A	B	B	B	A	B	-	A	A	B	B	B	B	A	A	A	-	B	B	B
S2_17210935_B	2	17210935	61.831	-	B	B	B	A	A	A	-	B	A	A	A	B	B	-	B	B	B	A	A	B	A	B	A	B	B	-	B	B	-	A	B	-	A	A	B	B	B	B	A	A	A	A	B	B	B
S2_17689901_B	2	17689901	61.831	B	B	B	B	A	A	A	A	B	A	A	A	B	B	-	B	B	A	A	A	B	A	B	A	B	B	-	B	B	-	A	B	-	A	A	B	B	B	B	A	A	A	-	B	B	B
S2_17761494_B	2	17761494	61.831	-	B	B	B	A	A	A	A	B	A	A	A	B	B	A	B	-	-	A	A	B	A	-	A	B	B	B	B	B	A	A	B	-	A	A	B	B	B	B	A	A	A	A	B	B	B
S2_17975844_B	2	17975844	61.831	-	B	B	B	A	A	A	A	B	A	A	A	B	B	A	B	-	-	A	A	B	A	-	A	B	B	B	B	B	-	A	B	-	A	A	B	B	B	B	A	A	A	-	B	B	B
S2_19727047_B	2	19727047	62.883	B	B	B	B	A	A	A	A	B	A	A	A	B	B	-	B	-	-	A	A	B	A	B	A	B	B	A	B	B	-	A	B	-	A	A	B	A	B	B	A	A	A	-	B	B	B
S2_19727048_B	2	19727048	62.883	B	B	B	B	A	A	A	A	B	A	A	A	B	B	-	B	-	-	A	A	B	A	B	A	B	B	A	B	B	-	A	B	-	A	A	B	A	B	B	A	A	A	-	B	B	B
S2_19727049_B	2	19727049	62.883	B	B	B	B	A	A	A	A	B	A	A	A	B	B	-	B	-	-	A	A	B	A	B	A	B	B	A	B	B	-	A	B	-	A	A	B	A	B	B	A	A	A	-	B	B	B
S2_19736975_B	2	19736975	62.883	B	B	B	B	A	A	A	A	B	A	A	A	B	B	-	B	-	B	A	A	B	A	-	A	B	B	-	B	B	B	A	B	B	A	A	B	A	B	B	A	A	A	A	B	B	B
S2_19736980_B	2	19736980	62.883	B	B	B	B	A	A	A	A	B	A	A	A	B	B	-	B	-	B	A	A	B	A	-	A	B	B	-	B	B	B	A	B	B	A	A	B	A	B	B	A	A	A	A	B	B	B
S2_20563273_B	2	20563273	62.883	B	B	B	B	A	A	A	A	B	A	A	A	B	B	A	B	A	-	A	A	B	A	-	A	B	B	-	B	B	B	A	B	-	A	A	B	A	B	B	A	A	A	-	B	B	B
S2_54390540_B	2	54390540	64.497	B	B	B	B	A	A	A	A	B	A	A	A	B	B	B	B	B	B	A	A	B	A	-	A	B	B	-	B	B	-	A	B	-	A	A	B	-	B	B	A	A	A	-	B	B	B
S2_55213919_B	2	55213919	64.497	B	B	B	B	A	A	A	B	B	A	A	A	B	B	-	B	-	B	A	A	B	A	-	A	B	B	A	B	B	-	A	B	B	A	A	B	-	B	B	A	A	A	-	B	B	B
S2_55268795_B	2	55268795	64.497	B	B	B	B	A	A	A	-	B	A	A	A	B	B	-	B	-	B	A	A	B	A	-	A	B	B	-	B	B	A	A	B	-	A	A	B	A	B	B	A	A	A	-	B	B	B
S2_55351132_B	2	55351132	65.002	B	B	B	B	A	A	A	B	B	A	A	A	B	B	B	B	-	B	A	A	B	A	-	A	B	B	B	B	B	A	A	B	-	A	A	B	A	B	B	A	A	A	B	B	B	B
S2_55351159_B	2	55351159	65.002	B	B	B	B	A	A	A	B	B	A	A	A	B	B	B	B	-	B	A	A	B	A	-	A	B	B	B	B	B	A	A	B	-	A	A	B	A	B	B	A	A	A	B	B	B	B
S2_55351163_B	2	55351163	65.002	B	B	B	B	A	A	A	B	B	A	A	A	B	B	B	B	-	B	A	A	B	A	-	A	B	B	B	B	B	A	A	B	-	A	A	B	A	B	B	A	A	A	B	B	B	B
S2_56427564_B	2	56427564	68.232	-	B	B	B	A	A	A	A	B	A	A	A	B	B	-	B	-	B	A	A	B	A	-	A	B	B	-	B	B	A	A	A	-	A	A	B	A	B	B	A	A	A	B	B	B	B
S2_56427565_B	2	56427565	68.232	-	B	B	B	A	A	A	A	B	A	A	A	B	B	-	B	-	B	A	A	B	A	-	A	B	B	-	B	B	A	A	A	-	A	A	B	A	B	B	A	A	A	B	B	B	B
S2_56427566_B	2	56427566	68.232	-	B	B	B	A	A	A	A	B	A	A	A	B	B	-	B	-	B	A	A	B	A	-	A	B	B	-	B	B	A	A	A	-	A	A	B	A	B	B	A	A	A	B	B	B	B
S2_56699698_B	2	56699698	69.812	B	B	B	B	A	A	A	A	B	A	A	A	B	B	-	B	B	B	A	A	B	A	-	A	B	B	A	B	A	A	A	A	-	A	A	B	A	B	B	A	A	A	-	B	B	B
S2_56699709_B	2	56699709	69.812	B	B	B	B	A	A	A	A	B	A	A	A	B	B	-	B	B	B	A	A	B	A	-	A	B	B	A	B	A	A	A	A	-	A	A	B	A	B	B	A	A	A	-	B	B	B
S2_56699713_B	2	56699713	69.812	B	B	B	B	A	A	A	A	B	A	A	A	B	B	-	B	B	B	A	A	B	A	-	A	B	B	A	B	A	A	A	A	-	A	A	B	A	B	B	A	A	A	-	B	B	B
S2_56699714_B	2	56699714	69.812	B	B	B	B	A	A	A	A	B	A	A	A	B	B	-	B	B	B	A	A	B	A	-	A	B	B	A	B	A	A	A	A	-	A	A	B	A	B	B	A	A	A	-	B	B	B
S2_56648843_B	2	56648843	70.333	B	B	B	B	A	A	A	A	B	A	A	A	B	B	A	B	-	B	A	A	B	A	-	A	B	B	-	B	A	-	A	A	-	A	A	B	A	B	B	A	A	A	-	B	B	B
S2_56852141_B	2	56852141	70.333	-	B	B	B	A	A	A	A	B	A	A	A	B	B	A	B	-	B	A	A	B	A	B	A	B	-	-	B	A	B	A	A	B	A	A	B	-	B	B	A	A	A	-	B	B	B
S2_56924340_B	2	56924340	70.333	B	B	B	B	A	A	-	A	B	A	A	-	B	B	-	B	A	B	A	A	B	A	-	A	B	B	-	B	A	-	A	A	B	A	A	B	A	B	B	A	A	A	-	B	B	B
S2_56962933_B	2	56962933	70.333	-	B	B	B	A	A	A	A	B	A	A	-	B	B	A	B	A	-	A	A	B	A	-	A	B	-	B	B	A	-	A	A	B	A	A	B	A	B	B	A	A	A	A	B	B	B
S2_56962953_B	2	56962953	70.333	-	B	B	B	A	A	A	A	B	A	A	-	B	B	A	B	A	-	A	A	B	A	-	A	B	-	B	B	A	-	A	A	B	A	A	B	A	B	B	A	A	A	A	B	B	B
S2_56962954_B	2	56962954	70.333	-	B	B	B	A	A	A	A	B	A	A	-	B	B	A	B	A	-	A	A	B	A	-	A	B	-	B	B	A	-	A	A	B	A	A	B	A	B	B	A	A	A	A	B	B	B
S2_56962956_B	2	56962956	70.333	-	B	B	B	A	A	A	A	B	A	A	-	B	B	A	B	A	-	A	A	B	A	-	A	B	-	B	B	A	-	A	A	B	A	A	B	A	B	B	A	A	A	A	B	B	B
S2_56981334_B	2	56981334	70.333	B	B	B	B	A	A	A	A	B	A	A	A	B	B	A	B	-	B	A	A	B	A	-	A	B	B	-	B	A	-	A	A	B	A	A	B	A	-	B	A	A	A	-	B	B	B
S2_57875126_B	2	57875126	72.508	B	B	B	B	A	A	A	A	B	A	A	B	B	B	B	B	A	-	A	A	B	A	A	A	B	B	-	B	A	B	A	A	A	A	A	B	A	B	B	A	A	A	B	B	B	B
S2_57875169_B	2	57875169	72.508	B	B	B	B	A	A	A	A	B	A	A	B	B	B	B	B	A	-	A	A	B	A	A	A	B	B	-	B	A	B	A	A	A	A	A	B	A	B	B	A	A	A	B	B	B	B
S2_57875171_B	2	57875171	72.508	B	B	B	B	A	A	A	A	B	A	A	B	B	B	B	B	A	-	A	A	B	A	A	A	B	B	-	B	A	B	A	A	A	A	A	B	A	B	B	A	A	A	B	B	B	B
S2_57875172_B	2	57875172	72.508	B	B	B	B	A	A	A	A	B	A	A	B	B	B	B	B	A	-	A	A	B	A	A	A	B	B	-	B	A	B	A	A	A	A	A	B	A	B	B	A	A	A	B	B	B	B
S2_57657846_B	2	57657846	73.034	-	B	B	B	A	A	A	A	B	A	A	B	B	B	-	B	A	B	A	A	B	A	-	A	B	B	A	B	A	-	A	A	-	A	A	B	A	B	B	A	A	A	B	B	B	B
S2_57657860_B	2	57657860	73.034	-	B	B	B	A	A	A	A	B	A	A	B	B	B	-	B	A	B	A	A	B	A	-	A	B	B	A	B	A	A	A	A	-	A	A	B	A	B	B	A	A	A	B	B	B	B
S2_57657876_B	2	57657876	73.034	-	B	B	B	A	A	A	A	B	A	A	B	B	B	-	B	A	B	A	A	B	A	-	A	B	B	A	B	A	-	A	A	-	A	A	B	A	B	B	A	A	A	B	B	B	B
S2_57591402_B	2	57591402	73.534	B	B	B	B	A	A	A	A	B	A	A	B	B	B	-	B	A	B	A	A	B	A	B	A	B	B	B	B	A	-	A	A	-	A	A	B	A	B	B	A	A	A	B	B	B	B
S2_57591444_B	2	57591444	73.534	B	B	B	B	A	A	A	A	B	A	A	B	B	B	-	B	A	B	A	A	B	A	B	A	B	B	B	B	A	-	A	A	-	A	A	B	A	B	B	A	A	A	B	B	B	B
S2_57591445_B	2	57591445	73.534	B	B	B	B	A	A	A	A	B	A	A	B	B	B	-	B	A	B	A	A	B	A	B	A	B	B	B	B	A	-	A	A	-	A	A	B	A	B	B	A	A	A	B	B	B	B
S2_57663973_B	2	57663973	74.565	-	B	B	B	A	A	A	A	B	A	A	B	B	B	A	B	A	B	A	A	B	A	A	A	B	B	-	B	A	A	A	A	-	A	A	B	-	B	B	A	A	A	B	B	B	B
S2_57664021_B	2	57664021	74.565	-	B	B	B	A	A	A	A	B	A	A	B	B	B	A	B	-	B	A	A	B	A	-	A	B	B	A	B	A	A	A	A	-	A	A	B	A	B	B	A	A	A	B	B	B	B
S2_57664036_B	2	57664036	74.565	-	B	B	B	A	A	A	A	B	A	A	B	B	B	A	B	-	B	A	A	B	A	-	A	B	B	A	B	A	A	A	A	-	A	A	B	A	B	B	A	A	A	B	B	B	B
S2_57665169_B	2	57665169	74.565	-	B	B	B	A	A	A	A	B	A	A	B	B	B	-	B	A	-	A	A	B	A	A	A	B	B	-	B	A	-	A	A	B	A	A	B	A	B	B	A	A	A	B	B	B	B
S2_57728127_B	2	57728127	74.565	B	B	B	B	A	A	A	A	B	A	A	B	B	B	A	B	-	B	A	A	B	A	-	A	B	B	-	B	A	-	A	A	-	A	A	B	-	B	B	A	A	A	B	B	B	B
S2_58212223_B	2	58212223	78.019	B	B	B	B	B	A	A	A	B	A	A	B	B	B	-	B	A	A	A	A	B	A	-	A	B	B	-	B	A	B	A	A	-	A	A	B	-	B	B	A	A	A	B	B	B	A
S2_58239256_B	2	58239256	78.019	B	B	B	B	B	A	A	A	B	A	A	B	B	B	-	B	A	A	A	A	B	A	-	A	B	B	-	B	A	-	A	A	A	A	A	B	A	B	B	A	A	A	B	B	B	A
S2_58239285_B	2	58239285	78.019	B	B	B	B	B	A	A	A	B	A	A	B	B	B	-	B	A	A	A	A	B	A	-	A	B	B	-	B	A	-	A	A	A	A	A	B	A	B	B	A	A	A	B	B	B	A
S2_58953933_B	2	58953933	82.739	B	B	B	B	B	A	A	A	B	A	A	B	B	B	B	B	A	A	A	A	B	A	B	A	B	B	B	B	A	A	A	A	-	A	A	B	A	B	B	A	A	B	B	B	B	A
S2_59032572_B	2	59032572	82.739	-	B	B	B	B	A	A	A	B	A	A	B	B	B	B	B	A	A	A	A	B	A	-	A	B	B	B	B	A	A	A	A	-	A	A	B	A	B	B	A	A	B	B	B	B	A
S2_59032574_B	2	59032574	82.739	-	B	B	B	B	A	A	A	B	A	A	B	B	B	B	B	A	A	A	A	B	A	-	A	B	B	B	B	A	A	A	A	-	A	A	B	A	B	B	A	A	B	B	B	B	A
S2_59726772_B	2	59726772	90.109	B	B	B	B	B	A	-	A	B	A	A	B	B	B	B	B	A	A	A	A	B	A	-	B	B	B	B	B	A	-	A	B	B	A	A	B	B	B	B	A	A	B	B	A	B	A
S2_59726812_B	2	59726812	90.109	B	B	B	B	B	A	-	A	B	A	A	B	B	B	B	B	A	A	A	A	B	A	-	B	B	B	B	B	A	-	A	B	B	A	A	B	B	B	B	A	A	B	B	A	B	A
S2_59726814_B	2	59726814	90.109	B	B	B	B	B	A	-	A	B	A	A	B	B	B	B	B	A	A	A	A	B	A	-	B	B	B	B	B	A	-	A	B	B	A	A	B	B	B	B	A	A	B	B	A	B	A
S2_59726826_B	2	59726826	90.109	B	B	B	B	B	A	-	A	B	A	A	B	B	B	B	B	A	A	A	A	B	A	-	B	B	B	B	B	A	-	A	B	B	A	A	B	B	B	B	A	A	B	B	A	B	A
S2_59912796_B	2	59912796	91.208	B	B	B	B	B	A	-	A	B	A	A	B	B	B	-	B	A	A	A	A	B	A	A	B	-	B	B	B	A	A	A	B	-	A	A	B	B	B	B	A	A	-	B	A	B	A
S2_59913592_B	2	59913592	91.208	B	B	B	B	B	A	A	A	B	A	A	B	B	B	-	B	A	A	A	A	B	A	A	B	-	B	B	B	A	A	A	B	B	A	A	B	B	B	B	A	A	-	B	A	B	A
S2_59913692_B	2	59913692	91.208	-	B	B	B	B	A	A	A	B	A	A	B	B	B	-	B	A	A	A	A	B	A	-	B	-	B	B	B	A	A	A	B	-	A	A	B	B	B	B	A	A	B	B	A	B	A
S2_61017401	2	61017401	95.287	B	B	B	B	B	A	-	A	B	A	A	B	B	B	-	B	A	A	A	B	A	A	A	B	B	B	B	B	A	-	A	B	-	A	A	B	A	B	B	A	A	A	B	A	B	A
S2_61266191	2	61266191	95.287	B	B	B	B	B	A	-	A	B	A	A	B	B	B	-	B	-	A	A	B	A	A	-	B	-	B	B	B	A	A	A	B	B	A	A	B	A	B	B	A	A	A	B	A	B	A
S2_61266192	2	61266192	95.287	B	B	B	B	B	A	-	A	B	A	A	B	B	B	-	B	-	A	A	B	A	A	-	B	-	B	B	B	A	A	A	B	B	A	A	B	A	B	B	A	A	A	B	A	B	A
S2_62009910	2	62009910	95.819	B	B	B	B	B	A	-	A	B	A	A	B	B	B	-	B	-	A	A	B	-	A	-	B	B	B	B	B	A	A	A	B	B	A	A	B	A	B	B	A	A	A	B	A	B	-
S2_62010202_B	2	62010202	95.819	B	B	B	B	B	-	-	A	B	A	A	B	B	B	-	B	B	A	A	B	B	A	-	B	B	B	B	B	A	-	A	B	B	A	A	B	A	B	B	A	A	A	B	A	B	B
S2_62020894_B	2	62020894	95.819	B	B	B	B	B	A	B	A	B	A	A	B	B	B	-	B	-	-	A	B	-	A	B	B	B	B	B	B	A	A	A	B	B	A	A	B	A	B	B	-	A	A	B	A	B	B
S2_62133252_B	2	62133252	95.819	B	B	B	B	B	A	B	A	B	A	A	B	B	B	-	B	A	-	A	B	-	A	-	B	B	B	B	B	A	A	A	B	B	A	A	B	A	B	B	A	A	A	B	A	B	-
S2_62138570_B	2	62138570	95.819	B	B	B	B	B	A	-	A	B	A	A	B	B	B	-	B	A	-	A	B	-	A	B	B	B	B	B	B	A	A	A	B	B	A	A	B	A	B	B	A	A	A	B	A	B	B
S2_62138571_B	2	62138571	95.819	B	B	B	B	B	A	-	A	B	A	A	B	B	B	-	B	A	-	A	B	-	A	B	B	B	B	B	B	A	A	A	B	B	A	A	B	A	B	B	A	A	A	B	A	B	B
S2_62703717	2	62703717	99.715	B	B	B	A	B	A	A	A	B	A	A	B	A	A	B	B	A	A	A	B	A	A	-	B	B	B	B	B	A	A	A	B	B	B	A	A	A	B	B	A	A	A	B	A	B	A
S2_62726243	2	62726243	99.715	B	B	B	A	B	A	A	A	B	A	A	B	A	A	B	B	A	-	A	B	A	A	-	B	B	B	B	B	A	A	A	B	B	-	A	A	A	B	B	A	A	A	B	A	B	A
S2_62918770	2	62918770	99.715	B	B	B	A	B	A	-	A	B	A	A	B	A	-	B	B	-	-	A	B	A	A	B	B	B	-	B	B	A	-	A	B	B	-	A	A	A	B	B	A	A	A	B	A	B	-
S2_63059670_B	2	63059670	101.844	B	B	B	A	B	A	B	A	B	A	A	B	A	A	B	B	-	-	A	B	B	A	B	B	B	B	B	B	A	-	A	B	B	-	A	A	A	B	B	A	A	A	B	A	B	-
S2_63124297_B	2	63124297	101.844	B	B	B	A	B	A	B	A	B	A	A	B	A	A	B	B	B	-	A	B	-	A	B	B	B	B	B	B	A	A	A	B	B	-	A	A	A	B	B	A	A	A	B	A	B	-
S2_63124298_B	2	63124298	101.844	B	B	B	A	B	A	B	A	B	A	A	B	A	A	B	B	B	-	A	B	-	A	B	B	B	B	B	B	A	A	A	B	B	-	A	A	A	B	B	A	A	A	B	A	B	-
S2_63124299_B	2	63124299	101.844	B	B	B	A	B	A	B	A	B	A	A	B	A	A	B	B	B	-	A	B	-	A	B	B	B	B	B	B	A	A	A	B	B	-	A	A	A	B	B	A	A	A	B	A	B	-
S2_63124300_B	2	63124300	101.844	B	B	B	A	B	A	B	A	B	A	A	B	A	A	B	B	B	-	A	B	-	A	B	B	B	B	B	B	A	A	A	B	B	-	A	A	A	B	B	A	A	A	B	A	B	-
S2_63357101_B	2	63357101	102.886	B	B	B	A	B	A	-	A	B	A	A	B	A	A	B	B	-	-	A	B	B	A	B	B	B	B	B	B	A	A	A	B	B	-	A	B	A	B	B	A	A	A	B	A	B	B
S2_63386561_B	2	63386561	102.886	B	B	B	A	B	A	B	A	B	A	A	B	A	A	B	B	-	-	A	B	B	A	B	B	B	-	B	B	A	-	A	B	B	-	A	B	A	B	B	A	A	A	B	A	B	-
S2_63467748_B	2	63467748	102.886	B	B	B	A	B	A	B	A	B	A	A	B	A	A	B	B	-	A	A	B	B	A	B	B	B	B	B	B	A	-	A	B	B	-	A	B	A	B	B	A	A	A	B	A	B	B
S2_63489891_B	2	63489891	102.886	B	B	B	A	B	A	-	A	B	A	A	B	A	A	B	B	A	-	A	B	B	A	B	B	B	-	B	B	A	A	A	B	B	B	A	B	A	B	B	A	A	A	B	A	B	B
S2_63489892_B	2	63489892	102.886	B	B	B	A	B	A	-	A	B	A	A	B	A	A	B	B	A	-	A	B	B	A	B	B	B	-	B	B	A	A	A	B	B	B	A	B	A	B	B	A	A	A	B	A	B	B
S2_63505890_B	2	63505890	102.886	B	B	B	A	B	A	B	A	B	A	A	B	A	A	B	B	B	-	A	B	B	A	B	B	B	-	B	B	A	-	A	B	B	-	A	B	A	B	B	A	A	A	B	A	B	-
S2_63505898_B	2	63505898	102.886	B	B	B	A	B	A	B	A	B	A	A	B	A	A	B	B	B	-	A	B	B	A	B	B	B	-	B	B	A	-	A	B	B	-	A	B	A	B	B	A	A	A	B	A	B	-
S2_63512330_B	2	63512330	102.886	B	B	B	A	B	A	-	A	B	A	A	B	A	A	B	B	-	-	A	B	B	A	B	B	B	-	B	B	A	-	A	B	B	-	A	B	A	B	B	A	A	A	B	A	B	-
S2_63520495_B	2	63520495	102.886	B	B	B	A	B	A	B	A	B	A	A	B	A	A	B	B	-	-	A	B	B	A	B	B	B	-	B	B	A	-	A	B	B	-	A	B	A	B	B	A	A	A	B	A	B	B
S2_63549255_B	2	63549255	102.886	B	B	B	A	B	A	-	A	B	A	A	B	A	A	B	B	B	B	A	B	B	A	B	B	B	B	B	B	A	A	A	B	B	A	A	B	A	B	B	A	A	A	B	A	B	-
S2_63585216_B	2	63585216	104.449	B	B	B	A	B	A	B	A	B	A	A	B	A	A	B	B	B	B	A	B	B	A	B	B	B	-	B	B	A	A	A	B	B	-	A	B	A	B	B	A	A	A	B	A	B	-
S2_63585280_B	2	63585280	104.449	B	B	B	A	B	A	B	A	B	A	A	B	A	A	B	B	B	B	A	B	B	A	B	B	B	-	B	B	A	A	A	B	B	-	A	B	A	B	B	A	A	A	B	A	B	B
S2_63634269_B	2	63634269	104.449	B	B	B	A	B	A	-	A	B	A	A	B	A	A	B	B	B	B	A	B	B	A	B	B	B	-	B	B	A	A	A	B	B	B	A	B	A	B	B	A	A	A	B	A	B	-
S2_63807125_B	2	63807125	105.996	B	B	B	A	B	A	-	A	B	A	A	B	A	A	B	B	B	B	A	B	B	A	B	B	B	-	B	B	A	A	A	B	B	-	A	B	A	B	B	A	A	A	B	A	A	-
S2_63807135_B	2	63807135	105.996	B	B	B	A	B	A	-	A	B	A	A	B	A	A	B	B	B	B	A	B	B	A	B	B	B	-	B	B	A	A	A	B	B	-	A	B	A	B	B	A	A	A	B	A	A	-
S2_63821651_B	2	63821651	105.996	B	B	B	A	B	A	-	A	B	A	A	B	A	A	B	B	B	B	A	B	B	A	B	B	B	B	B	B	A	A	A	B	B	B	A	B	A	B	B	A	A	A	B	A	A	-
S2_63826029_B	2	63826029	105.996	B	B	B	A	B	A	-	A	B	A	A	B	A	A	B	B	B	B	A	B	B	A	B	B	B	-	B	B	A	A	A	B	B	B	A	B	A	B	B	A	A	A	B	A	A	-
S2_64465164_B	2	64465164	108.103	B	B	B	A	B	A	-	A	B	A	A	B	A	A	B	B	B	B	A	B	B	A	B	B	B	-	A	A	A	A	A	B	B	-	A	B	A	B	B	A	A	A	B	A	A	-
S2_64465175_B	2	64465175	108.103	B	B	B	A	B	A	-	A	B	A	A	B	A	A	B	B	B	B	A	B	B	A	B	B	B	-	A	A	A	A	A	B	B	-	A	B	A	B	B	A	A	A	B	A	A	-
S2_64465176_B	2	64465176	108.103	B	B	B	A	B	A	-	A	B	A	A	B	A	A	B	B	B	B	A	B	B	A	B	B	B	-	A	A	A	A	A	B	B	-	A	B	A	B	B	A	A	A	B	A	A	-
S2_64550252_B	2	64550252	108.608	B	B	B	A	B	A	-	A	B	A	A	B	A	A	B	B	B	B	A	B	B	A	B	B	B	-	A	A	A	A	A	B	B	-	A	B	A	B	B	A	A	A	B	A	A	B
S2_64550466_B	2	64550466	108.608	B	B	B	A	B	A	A	A	B	A	A	B	A	A	B	B	B	B	A	B	B	A	B	B	B	-	A	A	A	A	A	B	B	B	A	B	A	B	B	A	A	A	B	A	A	-
S2_65036897_B	2	65036897	108.608	B	B	B	A	B	A	-	A	B	A	A	B	A	A	B	B	B	B	A	B	B	A	B	B	B	-	A	A	A	A	A	B	B	-	A	B	A	B	B	A	A	A	B	A	A	B
S2_65043002_B	2	65043002	108.608	B	B	B	A	B	A	-	A	B	A	A	B	A	A	B	B	B	B	A	B	B	A	B	B	B	-	A	A	A	A	A	B	B	-	A	B	A	B	B	A	A	A	B	A	A	-
S2_65043004_B	2	65043004	108.608	B	B	B	A	B	A	-	A	B	A	A	B	A	A	B	B	B	B	A	B	B	A	B	B	B	-	A	A	A	A	A	B	B	-	A	B	A	B	B	A	A	A	B	A	A	-
S2_65043032_B	2	65043032	108.608	B	B	B	A	B	A	-	A	B	A	A	B	A	A	B	B	B	B	A	B	B	A	B	B	B	-	A	A	A	A	A	B	B	-	A	B	A	B	B	A	A	A	B	A	A	-
S2_65088201_B	2	65088201	108.608	B	B	B	A	B	A	A	A	B	A	A	B	A	A	B	B	B	B	A	B	B	A	B	B	B	-	A	A	A	A	A	B	B	-	A	B	A	B	B	A	A	A	B	A	A	-
S2_65088242_B	2	65088242	108.608	B	B	B	A	B	A	A	A	B	A	A	B	A	A	B	B	B	B	A	B	B	A	B	B	B	-	A	A	A	A	A	B	B	-	A	B	A	B	B	A	A	A	B	A	A	-
S2_64314129_B	2	64314129	109.639	B	B	B	A	B	A	A	A	B	A	A	B	A	A	B	B	B	B	A	B	B	A	B	B	B	B	A	B	A	A	A	B	B	-	A	B	A	B	B	A	A	A	B	A	A	-
S2_64589685_B	2	64589685	109.639	B	B	B	A	B	A	-	A	B	A	A	B	A	A	B	B	B	B	A	B	B	A	B	B	B	B	A	B	A	A	A	B	B	B	A	B	A	B	B	A	A	A	B	A	A	-
S2_64589688_B	2	64589688	109.639	B	B	B	A	B	A	-	A	B	A	A	B	A	A	B	B	B	B	A	B	B	A	B	B	B	B	A	B	A	A	A	B	B	B	A	B	A	B	B	A	A	A	B	A	A	-
S2_65127262_B	2	65127262	109.639	B	B	B	A	B	A	-	A	B	A	A	B	A	A	B	B	B	B	A	B	B	A	B	B	B	-	A	-	A	A	A	B	B	-	A	B	A	B	B	A	A	A	B	A	A	B
S2_65199732_B	2	65199732	109.639	B	B	B	A	B	A	A	A	B	A	A	B	A	A	B	B	B	B	A	B	B	A	B	B	B	-	A	-	A	A	A	B	B	A	A	B	A	B	B	A	A	A	B	A	A	-
S2_64382555_B	2	64382555	110.149	B	B	B	A	B	A	-	A	B	A	A	B	A	A	B	B	B	B	A	B	B	A	B	B	B	B	A	B	A	A	A	B	B	-	A	B	A	B	B	A	A	A	B	A	A	B
S2_64382557_B	2	64382557	110.149	B	B	B	A	B	A	-	A	B	A	A	B	A	A	B	B	B	B	A	B	B	A	B	B	B	B	A	B	A	A	A	B	B	-	A	B	A	B	B	A	A	A	B	A	A	B
S2_64382559_B	2	64382559	110.149	B	B	B	A	B	A	-	A	B	A	A	B	A	A	B	B	B	B	A	B	B	A	B	B	B	B	A	B	A	A	A	B	B	-	A	B	A	B	B	A	A	A	B	A	A	B
S2_64382561_B	2	64382561	110.149	B	B	B	A	B	A	-	A	B	A	A	B	A	A	B	B	B	B	A	B	B	A	B	B	B	B	A	B	A	A	A	B	B	-	A	B	A	B	B	A	A	A	B	A	A	B
S2_64382563_B	2	64382563	110.149	B	B	B	A	B	A	-	A	B	A	A	B	A	A	B	B	B	B	A	B	B	A	B	B	B	B	A	B	A	A	A	B	B	-	A	B	A	B	B	A	A	A	B	A	A	B
S2_64531149_B	2	64531149	110.149	B	B	B	A	B	A	B	A	B	A	A	B	A	A	B	B	B	B	A	B	B	A	B	B	B	B	A	B	A	A	A	B	B	A	A	B	A	B	B	A	A	A	B	A	A	B
S2_65218961_B	2	65218961	110.149	B	B	B	A	B	A	-	A	B	A	A	B	A	A	B	B	B	B	A	B	B	A	B	B	B	-	A	-	A	A	A	B	B	-	A	B	A	B	B	A	A	A	B	A	A	-
S2_65219006_B	2	65219006	110.149	B	B	B	A	B	A	-	A	B	A	A	B	A	A	B	B	B	B	A	B	B	A	B	B	B	-	A	-	A	A	A	B	B	-	A	B	A	B	B	A	A	A	B	A	A	-
S2_65302067_B	2	65302067	110.67	B	B	B	A	B	A	-	A	B	A	A	A	A	A	B	B	B	B	A	B	B	A	B	B	B	B	A	-	A	A	A	B	B	-	A	B	A	B	B	A	A	A	B	A	A	B
S2_65329738_B	2	65329738	110.67	B	B	B	A	B	A	A	A	B	A	A	A	A	A	B	B	B	B	A	B	B	A	B	B	B	B	A	A	A	A	A	B	B	-	A	B	A	B	B	A	A	A	B	A	A	B
S2_65345311_B	2	65345311	110.67	B	B	B	A	B	A	-	A	B	A	A	A	A	A	B	B	B	B	A	B	B	A	B	B	B	-	A	A	A	A	A	B	B	B	A	B	A	B	B	A	A	A	B	A	A	B
S2_65352863_B	2	65352863	110.67	B	B	B	A	B	A	-	A	B	A	A	A	A	A	B	B	B	B	A	B	B	A	B	B	B	-	A	A	A	A	A	B	B	B	A	B	A	B	B	A	A	A	B	A	A	B
S2_65296480	2	65296480	111.175	B	B	B	A	B	A	-	A	B	A	A	A	A	A	B	B	B	B	A	B	B	A	B	B	B	-	A	-	A	A	A	B	B	-	A	B	A	B	B	A	A	A	B	A	A	-
S2_65357315	2	65357315	111.175	B	B	B	A	B	A	A	A	B	A	A	A	A	A	B	B	B	B	A	B	B	A	B	B	B	B	A	A	A	A	A	B	B	-	A	B	A	B	B	A	A	A	B	A	A	-
S2_65357317	2	65357317	111.175	B	B	B	A	B	A	A	A	B	A	A	A	A	A	B	B	B	B	A	B	B	A	B	B	B	B	A	A	A	A	A	B	B	-	A	B	A	B	B	A	A	A	B	A	A	-
S2_65043050	2	65043050	112.195	B	B	B	A	B	A	-	A	B	A	A	B	A	A	B	B	B	B	A	B	B	A	B	B	B	A	A	A	A	A	A	B	B	B	A	B	A	B	B	A	A	A	B	A	A	-
S2_65226801	2	65226801	112.195	B	B	B	A	B	A	-	A	B	A	A	B	A	A	B	B	B	B	A	B	B	A	B	B	B	A	A	A	A	A	A	B	B	-	A	B	A	B	B	A	A	A	B	A	A	-
S2_65226823	2	65226823	112.195	B	B	B	A	B	A	-	A	B	A	A	B	A	A	B	B	B	B	A	B	B	A	B	B	B	A	A	A	A	A	A	B	B	-	A	B	A	B	B	A	A	A	B	A	A	-
S2_65253606	2	65253606	112.7	B	B	B	A	B	A	A	A	B	A	A	A	A	A	B	B	B	B	A	B	B	A	B	B	B	A	A	A	A	A	A	B	B	-	A	B	A	B	B	A	A	A	B	A	A	-
S2_65313415_B	2	65313415	112.7	B	B	B	A	B	A	-	A	B	A	A	A	A	A	B	B	B	B	A	B	B	A	B	B	B	-	A	A	A	A	A	B	B	-	A	B	A	B	B	A	A	A	B	A	A	B
S2_65329464_B	2	65329464	112.7	B	B	B	A	B	A	-	A	B	A	A	A	A	A	B	B	B	B	A	B	B	A	B	B	B	-	A	-	A	A	A	B	B	-	A	B	A	B	B	A	A	-	B	A	A	B
S2_66514266_B	2	66514266	116.597	B	B	B	A	B	A	A	A	B	A	A	A	B	B	B	B	-	-	A	-	B	A	A	B	B	-	A	A	A	A	A	B	B	B	A	B	B	B	B	A	A	-	B	A	A	A
S2_66514296_B	2	66514296	116.597	B	B	B	A	B	A	A	A	B	A	A	A	B	B	B	B	B	-	A	-	B	-	A	B	B	B	A	-	A	A	A	B	B	B	A	B	B	B	B	A	A	A	B	A	A	A
S2_66579415_B	2	66579415	116.597	B	B	B	A	B	A	A	A	B	A	A	A	B	B	B	B	B	-	A	-	B	A	A	B	B	-	A	A	A	A	A	B	B	B	A	B	B	B	B	A	A	-	B	A	A	A
S2_66605632_B	2	66605632	116.597	B	B	B	A	B	A	A	A	B	A	A	A	B	B	B	B	-	-	A	-	B	A	A	B	B	-	A	A	A	A	A	B	B	B	A	B	B	B	B	A	A	-	B	A	A	A
S2_66623908_B	2	66623908	116.597	B	B	B	A	B	A	A	A	B	A	A	A	B	B	B	B	-	B	A	-	B	A	A	B	B	-	A	A	A	A	A	B	B	B	A	B	B	B	B	A	A	-	B	A	A	A
S2_67633094_B	2	67633094	116.597	B	B	B	A	B	A	A	A	B	A	A	A	B	B	B	B	-	-	A	A	B	A	A	B	B	-	A	A	A	A	A	B	B	B	A	B	B	B	B	A	A	A	B	A	A	A
S2_67752362_B	2	67752362	116.597	B	B	B	A	B	A	A	A	B	A	A	A	B	B	B	B	B	-	A	A	B	A	A	B	B	-	A	A	A	A	A	B	B	B	A	B	B	B	B	A	A	-	B	A	A	A
S2_67844602_B	2	67844602	116.597	B	B	B	A	B	A	A	A	B	A	A	A	B	B	B	B	-	-	A	-	B	A	A	B	B	-	A	A	A	A	A	B	B	B	A	B	B	B	B	A	A	A	B	A	A	A
S2_66633652_B	2	66633652	117.102	B	B	B	A	B	A	A	A	B	A	A	A	B	B	B	B	-	-	A	-	B	A	A	B	B	-	A	A	A	A	A	B	B	B	A	B	B	B	B	A	A	B	B	A	A	A
S2_66633686_B	2	66633686	117.102	B	B	B	A	B	A	A	A	B	A	A	A	B	B	B	B	-	-	A	A	B	A	A	B	B	-	A	A	A	A	A	B	B	B	A	B	B	B	B	A	A	B	B	A	A	A
S2_66633691_B	2	66633691	117.102	B	B	B	A	B	A	A	A	B	A	A	A	B	B	B	B	-	-	A	A	B	A	A	B	B	-	A	A	A	A	A	B	B	B	A	B	B	B	B	A	A	B	B	A	A	A
S2_67297471_B	2	67297471	117.102	B	B	B	A	B	A	A	A	B	A	A	A	B	B	B	B	-	-	A	-	B	A	A	B	B	-	A	A	A	A	A	B	B	B	A	B	B	B	B	A	A	-	B	A	A	A
S2_67990166_B	2	67990166	117.607	B	B	B	A	B	A	A	A	B	A	A	A	B	B	B	B	A	-	A	-	B	A	A	B	B	-	A	A	A	A	A	B	B	B	A	B	B	B	B	A	A	-	B	A	A	A
S2_68060345_B	2	68060345	117.607	B	B	B	A	B	A	A	A	B	A	A	A	B	B	B	B	-	-	A	-	B	A	A	B	B	-	A	A	A	A	A	B	B	B	A	B	B	B	B	A	A	-	B	A	A	A
S2_68060348_B	2	68060348	117.607	B	B	B	A	B	A	A	A	B	A	A	A	B	B	B	B	-	-	A	-	B	A	A	B	B	-	A	A	A	A	A	B	B	B	A	B	B	B	B	A	A	-	B	A	A	A
S2_68125410_B	2	68125410	117.607	B	B	B	A	B	A	A	A	B	A	A	A	B	B	B	B	B	-	A	-	B	A	A	B	B	-	A	A	A	A	A	B	B	B	A	B	B	B	B	A	A	-	B	A	A	A
S2_68194511_B	2	68194511	117.607	B	B	B	A	B	A	A	A	B	A	A	A	B	B	B	B	B	A	A	-	B	A	A	B	B	A	A	A	A	A	A	B	B	B	A	B	B	B	B	A	A	-	B	A	A	A
S2_68512782_B	2	68512782	117.607	B	B	B	A	B	A	A	A	B	A	A	A	B	B	B	B	-	-	A	A	B	A	A	B	B	-	A	A	A	A	A	B	B	B	A	B	B	B	B	A	A	A	B	A	A	A
S2_68531032_B	2	68531032	117.607	B	B	B	A	B	A	A	A	B	A	A	A	B	B	B	B	-	-	A	-	B	A	A	B	B	-	A	A	A	A	A	B	B	B	A	B	B	B	B	A	A	A	B	A	A	A
S2_68531047_B	2	68531047	117.607	B	B	B	A	B	A	A	A	B	A	A	A	B	B	B	B	-	-	A	-	B	A	A	B	B	-	A	A	A	A	A	B	B	B	A	B	B	B	B	A	A	A	B	A	A	A
S2_68531083_B	2	68531083	117.607	B	B	B	A	B	A	A	A	B	A	A	A	B	B	B	B	-	-	A	B	B	A	A	B	B	-	A	A	A	A	A	B	B	B	A	B	B	B	B	A	A	A	B	A	A	A
S2_67878704_B	2	67878704	118.112	B	B	B	A	B	A	A	A	B	-	A	A	B	B	B	B	B	B	A	-	B	A	A	B	B	-	A	A	A	A	A	B	B	B	A	B	B	B	B	A	A	A	B	A	A	A
S2_67930877_B	2	67930877	118.112	B	B	B	A	B	A	A	A	B	A	A	A	B	B	B	B	B	B	A	A	B	A	A	B	B	-	A	A	A	A	A	B	B	B	A	B	B	B	B	A	A	-	B	A	A	A
S2_67930882_B	2	67930882	118.112	B	B	B	A	B	A	A	A	B	A	A	A	B	B	B	B	B	B	A	A	B	A	A	B	B	-	A	A	A	A	A	B	B	B	A	B	B	B	B	A	A	-	B	A	A	A
S2_67930883_B	2	67930883	118.112	B	B	B	A	B	A	A	A	B	A	A	A	B	B	B	B	B	B	A	A	B	A	A	B	B	-	A	A	A	A	A	B	B	B	A	B	B	B	B	A	A	-	B	A	A	A
S2_67930884_B	2	67930884	118.112	B	B	B	A	B	A	A	A	B	A	A	A	B	B	B	B	B	B	A	A	B	A	A	B	B	-	A	A	A	A	A	B	B	B	A	B	B	B	B	A	A	-	B	A	A	A
S2_67977545_B	2	67977545	118.112	B	B	B	A	B	A	A	A	B	A	A	A	B	B	B	B	B	B	A	A	B	A	A	B	B	B	A	A	A	A	A	B	B	B	A	B	B	B	B	A	-	A	B	A	A	A
S2_67977572_B	2	67977572	118.112	B	B	B	A	B	A	A	A	B	A	A	A	B	B	B	B	B	B	A	A	B	A	A	B	B	B	A	A	A	A	A	B	B	B	A	B	B	B	B	A	-	A	B	A	A	A
S2_67873637_B	2	67873637	118.608	B	B	B	A	B	A	A	A	B	A	A	A	B	B	B	B	-	B	A	-	B	A	A	B	B	B	A	A	A	A	A	B	B	B	A	B	B	B	B	A	A	A	B	A	A	A
S2_68021423_B	2	68021423	118.608	B	B	B	A	B	A	A	A	B	A	A	A	B	B	B	B	B	B	A	-	B	A	A	B	B	-	A	A	A	A	A	B	B	B	A	B	B	B	B	A	A	-	B	A	A	A
S2_68021425_B	2	68021425	118.608	B	B	B	A	B	A	A	A	B	A	A	A	B	B	B	B	B	B	A	-	B	A	A	B	B	-	A	A	A	A	A	B	B	B	A	B	B	B	B	A	A	-	B	A	A	A
S2_68021462_B	2	68021462	118.608	B	B	B	A	B	A	A	A	B	A	A	A	B	B	B	B	B	B	A	-	B	A	A	B	B	-	A	A	A	A	A	B	B	B	A	B	B	B	B	A	A	-	B	A	A	A
S2_68505784_B	2	68505784	118.608	B	B	B	A	B	A	A	A	B	A	A	A	B	B	B	B	-	-	A	A	B	A	A	B	B	-	A	A	A	A	A	B	B	B	A	B	B	B	B	A	A	A	B	A	A	A
S2_68505816_B	2	68505816	118.608	B	B	B	A	B	A	A	A	B	A	A	A	B	B	B	B	-	-	A	A	B	A	A	B	B	-	A	A	A	A	A	B	B	B	A	B	B	B	B	A	A	A	B	A	A	A
S2_67732545_B	2	67732545	119.103	B	B	B	A	B	A	A	A	B	A	-	A	B	B	B	B	B	B	A	-	B	A	A	B	B	B	A	A	A	A	-	B	B	B	A	B	B	B	B	A	A	-	B	A	A	A
S2_67732546_B	2	67732546	119.103	B	B	B	A	B	A	A	A	B	A	-	A	B	B	B	B	B	B	A	-	B	A	A	B	B	B	A	A	A	A	-	B	B	B	A	B	B	B	B	A	A	-	B	A	A	A
S2_67732547_B	2	67732547	119.103	B	B	B	A	B	A	A	A	B	A	-	A	B	B	B	B	B	B	A	-	B	A	A	B	B	B	A	A	A	A	-	B	B	B	A	B	B	B	B	A	A	-	B	A	A	A
S2_67746238_B	2	67746238	119.103	B	B	B	A	B	A	A	A	B	A	A	A	B	B	B	B	B	-	A	A	B	A	A	B	B	B	A	A	A	A	A	B	B	B	A	B	B	B	B	A	A	-	B	A	A	A
S2_67751888_B	2	67751888	119.103	B	B	B	A	B	A	A	A	B	A	A	A	B	B	B	B	B	-	A	A	B	A	A	B	B	B	A	A	A	A	-	B	B	B	A	B	B	B	B	A	A	-	B	A	A	A
S2_67754272_B	2	67754272	119.103	B	B	B	A	B	A	A	A	B	A	A	A	B	B	B	B	-	-	A	A	B	A	A	B	B	-	A	A	A	A	A	B	B	B	A	B	B	B	B	A	A	A	B	A	A	A
S2_67836766_B	2	67836766	119.103	B	B	B	A	B	A	A	A	B	A	A	A	B	B	B	B	-	B	A	-	B	A	A	B	B	B	A	A	A	A	A	B	B	B	A	B	B	B	B	A	A	-	B	A	A	A
S2_67551044_B	2	67551044	119.593	B	B	B	A	B	A	A	A	B	A	A	A	B	B	B	B	-	-	A	A	B	A	A	B	B	-	A	A	A	A	A	B	B	B	A	B	B	B	B	A	A	A	B	A	A	A
S2_67656715_B	2	67656715	119.593	B	B	B	A	B	A	A	A	B	A	A	A	B	B	B	B	-	B	A	-	B	A	A	B	B	-	A	A	A	A	A	B	B	B	A	B	B	B	B	A	A	-	B	A	A	A
S2_67656815_B	2	67656815	119.593	B	B	B	A	B	A	A	A	B	A	A	A	B	B	B	B	A	-	A	-	B	A	A	B	B	-	A	A	A	A	A	B	B	B	A	B	B	B	B	A	A	-	B	A	A	A
S2_67656816_B	2	67656816	119.593	B	B	B	A	B	A	A	A	B	A	A	A	B	B	B	B	A	-	A	-	B	A	A	B	B	-	A	A	A	A	A	B	B	B	A	B	B	B	B	A	A	-	B	A	A	A
S2_67011223_B	2	67011223	120.603	B	B	B	A	B	A	A	A	B	A	A	A	B	B	B	B	B	B	A	-	B	A	A	B	B	-	A	A	A	B	A	B	B	B	A	B	B	B	B	A	A	A	B	A	A	A
S2_67034112_B	2	67034112	120.603	B	B	B	A	B	A	A	A	B	A	A	A	B	B	B	B	-	-	A	-	B	A	A	B	B	-	A	A	A	B	A	B	B	B	A	B	B	B	B	A	A	-	B	A	A	A
S2_67121584_B	2	67121584	120.603	B	B	B	A	B	A	A	A	B	A	A	A	B	B	B	B	-	B	A	-	B	A	A	B	B	-	A	A	A	B	A	B	B	B	A	B	B	B	B	A	A	-	B	A	A	A
S2_67233659_B	2	67233659	120.603	B	B	B	A	B	A	A	A	B	A	A	A	B	B	B	B	-	A	A	-	B	A	A	B	B	B	A	A	A	B	A	B	B	B	A	B	B	B	B	A	A	-	B	A	A	A
S2_67977184_B	2	67977184	121.624	B	B	B	A	B	A	A	A	B	A	A	A	B	B	B	B	A	A	A	-	B	A	A	B	B	-	A	A	A	A	A	B	B	B	A	B	B	B	B	A	A	A	B	A	A	A
S2_67977203_B	2	67977203	121.624	B	B	B	A	B	A	A	A	B	A	A	A	B	B	B	B	A	A	A	-	B	A	A	B	B	-	A	A	A	A	A	B	B	B	A	B	B	B	B	A	A	A	B	A	A	A
S2_67983879_B	2	67983879	121.624	B	B	B	A	B	A	A	A	B	A	A	A	B	B	B	B	A	-	A	-	B	A	A	B	B	-	A	A	A	A	A	B	B	B	A	B	B	B	B	A	A	A	B	A	A	A
S2_67983899_B	2	67983899	121.624	B	B	B	A	B	A	A	A	B	A	A	A	B	B	B	B	A	-	A	-	B	A	A	B	B	-	A	A	A	A	A	B	B	B	A	B	B	B	B	A	A	A	B	A	A	A
S2_68138070	2	68138070	121.624	B	B	B	A	B	A	A	A	B	A	A	A	-	B	B	B	-	-	A	A	B	A	A	B	-	-	A	A	A	A	A	B	B	B	A	B	B	B	B	A	A	A	-	A	A	A
S2_68138071	2	68138071	121.624	B	B	B	A	B	A	A	A	B	A	A	A	-	B	B	B	-	-	A	A	B	A	A	B	-	-	A	A	A	A	A	B	B	B	A	B	B	B	B	A	A	A	-	A	A	A
S2_69362046_B	2	69362046	122.114	B	B	B	A	B	A	A	A	B	A	A	A	B	B	B	B	A	-	A	B	B	A	A	B	B	-	A	A	A	A	B	B	B	B	A	B	B	B	B	A	A	-	B	A	A	A
S2_69443899_B	2	69443899	122.114	B	B	B	A	B	A	A	A	B	A	A	A	B	B	B	B	-	B	A	B	B	A	A	B	B	B	A	A	A	A	B	B	B	B	A	B	B	B	B	A	A	-	B	A	A	A
S2_69443938_B	2	69443938	122.114	B	B	B	A	B	A	A	A	B	A	A	A	B	B	B	B	-	B	A	B	B	A	A	B	B	-	A	A	A	A	B	B	B	B	A	B	B	B	B	A	A	-	B	A	A	A
S2_69554429_B	2	69554429	122.114	B	B	B	A	B	A	A	A	B	A	A	A	B	B	B	B	A	-	A	B	B	A	A	B	B	A	A	A	A	A	B	B	B	B	A	B	B	B	B	A	A	B	B	A	A	A
S2_69194608_B	2	69194608	122.609	B	B	B	A	B	A	A	A	B	A	A	A	B	B	B	B	-	-	A	B	B	A	A	B	B	-	A	A	A	A	B	B	B	B	A	B	B	B	B	A	A	A	B	A	-	A
S2_69200414_B	2	69200414	122.609	B	B	B	A	B	A	A	A	B	A	A	A	B	B	B	B	B	-	A	B	B	A	A	B	B	-	A	A	A	A	B	B	B	B	A	B	B	B	B	A	A	-	B	A	A	A
S2_69223415_B	2	69223415	122.609	B	B	B	A	B	A	A	A	B	A	A	A	B	B	B	B	B	B	A	B	B	A	A	B	B	-	A	A	A	A	B	B	B	B	A	B	B	B	B	A	A	A	B	A	A	A
S2_69417579_B	2	69417579	122.609	B	B	B	A	B	A	A	A	B	A	A	A	B	B	B	B	A	-	A	B	B	A	A	B	B	-	A	A	A	A	B	B	B	B	A	B	B	B	B	A	A	A	B	A	A	A
S2_69443290_B	2	69443290	122.609	B	B	B	A	B	A	A	A	B	A	A	A	B	B	B	B	A	-	A	B	B	A	A	B	B	-	A	A	A	A	B	B	B	B	A	B	B	B	B	A	A	A	B	A	A	A
S2_69151661_B	2	69151661	123.109	B	B	B	A	B	A	A	A	B	A	A	A	B	B	B	B	B	-	A	B	B	A	A	B	B	B	A	A	A	A	B	B	B	B	A	B	B	B	B	A	A	-	B	A	A	A
S2_69174874_B	2	69174874	123.109	B	B	B	A	B	A	A	A	B	A	A	A	B	B	B	B	B	-	-	B	B	A	A	B	B	-	A	A	A	A	B	B	B	B	A	B	B	B	B	A	A	A	B	A	A	A
S2_69327198_B	2	69327198	123.109	B	B	B	A	B	A	A	A	B	A	A	A	B	B	B	B	-	B	A	B	B	A	A	B	B	-	A	A	A	A	B	B	B	B	A	B	B	B	B	A	A	A	B	A	A	A
S2_68923542_B	2	68923542	123.609	B	B	B	A	B	A	A	A	B	A	A	A	B	B	B	B	-	B	A	B	B	A	A	B	B	A	A	A	A	A	B	B	B	B	A	B	B	B	B	A	A	A	B	A	A	A
S2_68923590_B	2	68923590	123.609	B	B	B	A	B	A	A	A	B	A	A	A	B	B	B	B	-	B	A	B	B	A	A	B	B	A	A	A	A	A	B	B	B	B	A	B	B	B	B	A	A	A	B	A	A	A
S2_69025301_B	2	69025301	123.609	B	B	-	A	B	A	A	A	B	A	A	A	B	B	B	B	-	-	A	B	B	A	A	B	B	-	A	A	A	A	B	B	B	B	A	B	B	B	B	A	A	-	B	A	A	A
S2_69104795_B	2	69104795	123.609	B	B	B	A	B	A	A	A	B	A	A	A	B	B	B	B	-	-	A	B	B	A	A	B	B	-	A	A	A	A	B	B	B	B	A	B	B	B	B	A	A	A	B	A	A	A
S2_69104796_B	2	69104796	123.609	B	B	B	A	B	A	A	A	B	A	A	A	B	B	B	B	-	-	A	B	B	A	A	B	B	-	A	A	A	A	B	B	B	B	A	B	B	B	B	A	A	-	B	A	A	A
S2_69135792_B	2	69135792	123.609	B	B	B	A	B	A	A	A	B	A	A	A	B	B	B	B	-	B	A	B	B	A	A	B	B	B	A	A	A	A	B	B	B	B	A	B	B	B	B	A	A	-	B	A	A	A
S2_69151417_B	2	69151417	123.609	B	B	B	A	B	A	A	A	B	A	A	A	B	B	B	B	-	B	A	B	B	A	A	B	B	-	A	A	A	A	B	B	B	B	A	B	B	B	B	A	A	A	B	A	A	A
S2_69151457_B	2	69151457	123.609	B	B	B	A	B	A	A	A	B	A	A	A	B	B	B	B	-	B	A	B	B	A	A	B	B	-	A	A	A	A	B	B	B	B	A	B	B	B	B	A	A	A	B	A	A	A
S2_69239214_B	2	69239214	123.609	B	B	B	A	B	A	A	A	B	A	A	A	B	B	B	B	-	B	A	B	B	A	A	B	B	-	A	A	A	A	B	B	B	B	A	B	B	B	B	A	A	A	B	A	A	A
S2_69443533_B	2	69443533	123.609	B	B	B	A	B	A	A	A	B	A	A	A	B	B	B	B	-	-	A	B	B	A	A	B	B	A	A	A	A	A	B	B	B	B	A	B	B	B	B	A	A	-	B	A	A	A
S2_69501839_B	2	69501839	124.109	B	B	B	A	B	A	A	A	B	A	A	A	B	B	B	B	-	-	A	B	B	A	A	B	B	A	A	A	A	A	B	B	B	B	A	B	B	B	B	A	A	B	B	A	A	A
S2_69593580_B	2	69593580	124.109	B	B	B	A	B	A	A	A	B	A	A	A	B	B	B	B	B	-	A	B	-	A	A	B	B	-	A	A	A	A	B	B	B	B	A	B	B	B	B	A	A	B	B	A	A	A
S2_69593618_B	2	69593618	124.109	B	B	B	A	B	A	A	A	B	A	A	A	B	B	B	B	B	-	A	B	-	A	A	B	B	A	A	A	A	A	B	B	B	B	A	B	B	B	B	A	A	B	B	A	A	A
S2_69604838_B	2	69604838	125.129	B	B	B	A	B	A	A	A	B	A	A	A	B	B	B	B	-	-	A	B	B	A	-	B	B	-	A	A	A	A	B	B	B	B	A	B	B	B	B	A	A	B	B	A	A	A
S2_69604878_B	2	69604878	125.129	B	B	B	A	B	A	A	A	B	A	A	A	B	B	B	B	-	-	A	B	B	A	-	B	B	-	A	A	A	A	B	B	B	B	A	B	B	B	B	A	A	B	B	A	A	A
S2_69660974_B	2	69660974	125.129	B	B	B	A	B	A	A	A	B	A	A	A	B	B	B	B	-	-	A	B	-	A	-	B	B	-	A	A	A	A	B	B	B	B	A	B	B	B	B	A	A	B	B	A	A	A
S2_69841507_B	2	69841507	125.129	B	B	B	A	B	A	A	A	B	A	A	A	B	B	B	B	-	-	A	B	-	A	B	B	B	-	A	A	A	A	B	B	B	B	A	B	B	B	B	A	A	B	B	A	A	A
S2_69925397_B	2	69925397	127.171	B	B	B	A	B	A	A	A	B	B	A	A	B	B	B	B	B	B	A	B	B	A	A	B	B	-	A	A	A	A	B	B	B	B	A	B	B	B	B	A	A	B	B	A	A	A
S2_69925398_B	2	69925398	127.171	B	B	B	A	B	A	A	A	B	B	A	A	B	B	B	B	B	B	A	B	B	A	A	B	B	-	A	A	A	A	B	B	B	B	A	B	B	B	B	A	A	B	B	A	A	A
S2_69925399_B	2	69925399	127.171	B	B	B	A	B	A	A	A	B	B	A	A	B	B	B	B	B	B	A	B	B	A	A	B	B	-	A	A	A	A	B	B	B	B	A	B	B	B	B	A	A	B	B	A	A	A
S2_69925400_B	2	69925400	127.171	B	B	B	A	B	A	A	A	B	B	A	A	B	B	B	B	B	B	A	B	B	A	A	B	B	-	A	A	A	A	B	B	B	B	A	B	B	B	B	A	A	B	B	A	A	A
S2_69940973_B	2	69940973	128.133	B	B	B	A	B	A	A	A	B	B	A	A	B	B	B	B	B	B	B	B	B	A	A	B	B	-	A	A	A	A	B	B	B	B	A	B	B	B	B	A	A	B	B	A	A	A
S2_69961335_B	2	69961335	128.133	B	B	B	A	B	A	A	-	B	B	A	A	B	B	B	B	B	-	B	B	-	A	-	B	B	-	A	A	A	A	B	B	B	B	A	B	B	B	B	A	A	B	B	A	A	A
S2_69970341_B	2	69970341	128.133	B	B	B	A	B	A	A	A	B	B	A	A	B	B	B	B	B	B	B	B	-	A	-	B	B	-	A	A	A	A	B	B	B	B	A	B	B	B	B	A	A	B	B	A	A	A
S2_69979197_B	2	69979197	128.133	B	B	B	A	B	A	A	A	B	B	A	A	B	B	B	B	B	-	B	B	-	A	-	B	B	B	A	A	A	A	B	B	B	B	A	B	B	B	B	A	A	B	B	A	A	A
S2_69979221_B	2	69979221	128.133	B	B	B	A	B	A	A	A	B	B	A	A	B	B	B	B	B	-	B	B	-	A	-	B	B	B	A	A	A	A	B	B	B	B	A	B	B	B	B	A	A	B	B	A	A	A
S2_70224208_B	2	70224208	131.863	B	B	B	A	A	A	A	-	B	B	B	A	B	B	B	B	-	B	B	B	-	A	-	B	B	-	A	A	A	A	B	B	B	B	B	A	B	B	B	A	A	B	B	A	A	A
S2_70241176_B	2	70241176	131.863	B	B	B	A	A	A	A	A	B	B	B	A	B	B	B	B	A	-	B	B	-	A	-	B	B	B	A	A	A	A	B	B	B	B	B	A	B	B	B	A	A	B	B	A	A	A
S2_70241179_B	2	70241179	131.863	B	B	B	A	A	A	A	A	B	B	B	A	B	B	B	B	A	-	B	B	-	A	-	B	B	B	A	A	A	A	B	B	B	B	B	A	B	B	B	A	A	B	B	A	A	A
S2_70241236_B	2	70241236	131.863	B	B	B	A	A	A	A	A	B	B	B	A	B	B	B	B	A	-	B	B	-	A	B	B	B	-	A	A	A	A	B	B	B	B	B	A	B	B	B	A	A	B	B	A	A	A
S2_70264733_B	2	70264733	131.863	B	B	B	A	A	A	A	-	B	B	B	A	B	B	B	B	A	B	B	B	-	A	B	B	B	A	A	A	A	A	B	B	B	B	B	A	B	B	B	A	A	B	B	A	A	A
S2_70372358_B	2	70372358	131.863	B	B	B	A	A	A	A	-	B	B	B	A	B	B	B	B	A	B	B	B	-	A	B	B	B	-	A	A	A	A	B	B	B	B	B	A	B	B	B	A	A	B	B	A	A	A
S2_70250459_B	2	70250459	132.368	B	B	B	A	A	A	A	-	B	B	B	A	B	B	B	B	A	B	B	B	-	A	B	B	B	-	A	A	A	A	B	B	B	B	B	A	B	-	B	A	A	B	B	A	A	A
S2_70444631_B	2	70444631	133.369	B	B	B	A	A	A	A	A	B	B	B	A	B	B	B	B	A	B	B	B	B	A	-	B	B	A	A	A	A	A	B	B	B	B	B	A	B	B	B	A	A	B	B	A	B	A
S2_70461532_B	2	70461532	133.369	B	B	B	A	A	A	A	-	B	B	B	A	B	B	B	B	A	B	B	B	-	A	B	B	B	-	A	A	A	A	B	B	B	B	B	A	B	B	B	A	A	B	B	A	B	A
S2_70469027_B	2	70469027	133.369	B	B	B	A	A	A	A	-	B	B	B	A	B	B	B	B	A	-	B	B	-	A	-	B	B	-	A	A	A	A	B	B	B	B	B	A	B	B	B	A	A	B	B	A	B	A
S2_70469037_B	2	70469037	133.369	B	B	B	A	A	A	A	-	B	B	B	A	B	B	B	B	A	-	B	B	-	A	-	B	B	-	A	A	A	A	B	B	B	B	B	A	B	B	B	A	A	B	B	A	B	A
S2_70817477_B	2	70817477	134.369	B	B	B	A	A	A	A	-	B	B	B	A	B	B	B	B	A	-	B	B	-	A	A	B	B	B	A	A	A	A	B	B	B	B	B	A	B	B	B	A	A	B	B	A	B	A
S2_70835448_B	2	70835448	134.369	B	B	B	A	A	A	A	A	B	B	B	A	B	B	B	B	A	A	B	B	B	A	A	B	B	B	A	A	A	A	B	B	B	B	B	A	B	B	B	A	A	B	B	A	B	A
S2_70854825_B	2	70854825	134.369	B	B	B	A	A	A	A	A	B	B	B	A	B	B	B	B	A	B	B	B	-	A	A	B	B	-	A	A	A	A	B	B	B	B	B	A	B	B	B	A	A	B	B	A	B	A
S2_70854826_B	2	70854826	134.369	B	B	B	A	A	A	A	A	B	B	B	A	B	B	B	B	A	B	B	B	-	A	A	B	B	-	A	A	A	A	B	B	B	B	B	A	B	B	B	A	A	B	B	A	B	A
S2_70670834_B	2	70670834	134.859	B	B	B	A	A	A	A	A	B	B	B	A	B	B	B	B	A	B	B	B	A	A	-	B	B	B	A	A	A	A	B	B	B	B	B	A	B	B	B	A	A	B	B	A	B	A
S2_70818344_B	2	70818344	134.859	B	B	B	A	A	A	A	A	B	B	B	A	B	B	B	B	A	B	B	B	-	A	A	B	B	-	A	A	A	A	B	B	B	B	B	A	B	B	B	A	A	B	B	A	B	A
S2_70819586_B	2	70819586	134.859	B	B	B	A	A	A	A	-	B	B	B	A	B	B	B	B	A	-	B	B	-	A	A	B	B	-	A	A	A	A	B	B	B	B	B	A	B	B	B	A	A	B	B	A	B	A
S2_70819606_B	2	70819606	134.859	B	B	B	A	A	A	A	-	B	B	B	A	B	B	B	B	A	-	B	B	-	A	A	B	B	-	A	A	A	A	B	B	B	B	B	A	B	B	B	A	A	B	B	A	B	A
S2_70819607_B	2	70819607	134.859	B	B	B	A	A	A	A	-	B	B	B	A	B	B	B	B	A	-	B	B	-	A	A	B	B	-	A	A	A	A	B	B	B	B	B	A	B	B	B	A	A	B	B	A	B	A
S2_70819615_B	2	70819615	134.859	B	B	B	A	A	A	A	-	B	B	B	A	B	B	B	B	A	-	B	B	-	A	A	B	B	-	A	A	A	A	B	B	B	B	B	A	B	B	B	A	A	B	B	A	B	A
S2_70882347_B	2	70882347	134.859	B	B	B	A	A	A	A	-	B	B	B	A	B	B	B	B	A	B	B	B	A	A	B	B	B	B	A	A	A	A	B	B	B	B	B	A	B	B	B	A	A	B	B	A	B	A
S2_70882348_B	2	70882348	134.859	B	B	B	A	A	A	A	-	B	B	B	A	B	B	B	B	A	B	B	B	A	A	B	B	B	B	A	A	A	A	B	B	B	B	B	A	B	B	B	A	A	B	B	A	B	A
S2_70991148_B	2	70991148	134.859	B	B	B	A	A	A	A	-	B	B	B	A	B	B	B	B	A	B	B	B	-	A	B	B	B	B	A	A	A	A	B	B	B	-	B	A	B	B	B	A	A	B	B	A	B	A
S2_70991150_B	2	70991150	134.859	B	B	B	A	A	A	A	-	B	B	B	A	B	B	B	B	A	B	B	B	-	A	B	B	B	B	A	A	A	A	B	B	B	B	B	A	B	B	B	A	A	B	B	A	B	A
S2_70615666_B	2	70615666	136.359	B	B	-	A	A	A	A	-	B	B	B	A	B	B	B	B	A	B	B	B	-	A	-	B	B	-	A	A	A	A	B	B	B	B	B	A	B	B	B	A	A	B	B	A	B	A
S2_70869286_B	2	70869286	136.359	B	B	B	A	A	A	A	-	B	B	B	A	B	B	B	B	A	B	B	B	-	A	A	B	B	-	A	A	A	A	B	B	B	B	B	A	B	B	B	A	A	B	B	A	B	A
S2_70869287_B	2	70869287	136.359	B	B	B	A	A	A	A	-	B	B	B	A	B	B	B	B	A	B	B	B	-	A	A	B	B	-	A	A	A	A	B	B	B	B	B	A	B	B	B	A	A	B	B	A	B	A
S2_70921952_B	2	70921952	136.359	B	B	B	A	A	A	A	-	B	B	B	A	B	B	B	B	A	-	B	B	A	A	-	B	B	-	A	A	A	A	B	B	B	B	B	A	B	B	B	A	A	B	B	A	B	A
S2_70921955_B	2	70921955	136.359	B	B	B	A	A	A	A	-	B	B	B	A	B	B	B	B	A	-	B	B	A	A	-	B	B	-	A	A	A	A	B	B	B	B	B	A	B	B	B	A	A	B	B	A	B	A
S2_70922890_B	2	70922890	136.359	B	B	B	A	A	A	A	A	B	B	B	A	B	B	B	B	A	B	B	B	-	A	B	B	B	-	A	A	A	A	B	B	B	B	B	A	B	B	B	A	A	B	B	A	B	A
S2_70928881_B	2	70928881	136.359	B	B	B	A	A	A	A	A	B	B	B	A	B	B	B	B	A	B	B	B	-	A	B	B	B	A	A	A	A	A	B	B	B	B	B	A	B	B	B	A	A	B	B	A	B	A
S2_70991091_B	2	70991091	136.359	B	B	B	A	A	A	A	-	B	B	B	A	B	B	B	B	A	-	B	B	B	A	B	B	B	-	A	A	A	A	B	B	B	B	B	A	B	B	B	A	A	B	B	A	B	A
S2_70991111_B	2	70991111	136.359	B	B	B	A	A	A	A	-	B	B	B	A	B	B	B	B	A	-	B	B	B	A	B	B	B	-	A	A	A	A	B	B	B	B	B	A	B	B	B	A	A	B	B	A	B	A
S2_72032581_B	2	72032581	138.422	B	B	B	A	A	A	A	B	B	B	B	A	B	B	B	B	A	B	B	B	B	A	A	B	B	-	A	A	A	A	B	B	B	-	B	A	B	B	B	A	A	B	B	A	B	A
S2_72032582_B	2	72032582	138.422	B	B	B	A	A	A	A	B	B	B	B	A	B	B	B	B	A	B	B	B	B	A	A	B	B	-	A	A	A	A	B	B	B	-	B	A	B	B	B	A	A	B	B	A	B	A
S2_72032583_B	2	72032583	138.422	B	B	B	A	A	A	A	B	B	B	B	A	B	B	B	B	A	B	B	B	B	A	A	B	B	-	A	A	A	A	B	B	B	-	B	A	B	B	B	A	A	B	B	A	B	A
S2_72032584_B	2	72032584	138.422	B	B	B	A	A	A	A	B	B	B	B	A	B	B	B	B	A	B	B	B	B	A	A	B	B	-	A	A	A	A	B	B	B	-	B	A	B	B	B	A	A	B	B	A	B	A
S2_71346670_B	2	71346670	139.443	-	B	B	A	A	A	A	B	B	B	B	A	B	B	B	B	A	-	B	B	-	A	A	B	B	-	A	A	A	A	B	B	B	B	B	A	B	B	B	A	A	B	B	A	B	A
S2_71346679_B	2	71346679	139.443	-	B	B	A	A	A	A	B	B	B	B	A	B	B	B	B	A	-	B	B	-	A	A	B	B	-	A	A	A	A	B	B	B	B	B	A	B	B	B	A	A	B	B	A	B	A
S2_71365050_B	2	71365050	139.443	B	B	B	A	A	A	A	B	B	B	B	A	B	B	B	B	A	-	B	B	-	A	A	B	B	-	A	A	A	A	B	B	B	-	B	A	B	B	B	A	A	B	B	A	B	A
S2_71758014_B	2	71758014	140.474	B	B	B	A	A	A	A	B	B	B	B	A	B	B	B	B	A	-	B	B	-	A	A	B	B	-	A	A	A	A	B	B	B	-	B	A	B	B	B	A	A	B	B	A	B	A
S2_71758038_B	2	71758038	140.474	B	B	B	A	A	A	A	B	B	B	B	A	B	B	B	B	A	-	B	B	A	A	A	B	B	B	A	A	A	A	B	B	B	-	B	A	B	B	B	A	A	B	B	A	B	A
S2_71761753_B	2	71761753	140.474	B	B	B	A	A	A	A	B	B	B	B	A	B	B	B	B	A	B	B	B	-	A	A	B	B	-	A	A	A	A	B	B	B	-	B	A	B	B	B	A	A	B	B	A	B	A
S2_71761759_B	2	71761759	140.474	B	B	B	A	A	A	A	B	B	B	B	A	B	B	B	B	A	B	B	B	-	A	A	B	B	-	A	A	A	A	B	B	B	-	B	A	B	B	B	A	A	B	B	A	B	A
S2_71903522_B	2	71903522	140.474	B	B	B	A	A	A	A	B	B	B	B	A	B	B	B	B	A	-	B	B	-	A	A	B	B	B	A	A	A	A	B	B	B	-	B	A	B	B	B	A	A	B	B	A	B	A
S2_71903544_B	2	71903544	140.474	B	B	B	A	A	A	A	B	B	B	B	A	B	B	B	B	A	-	B	B	-	A	A	B	B	B	A	A	A	A	B	B	B	-	B	A	B	B	B	A	A	B	B	A	B	A
S2_71903558_B	2	71903558	140.474	B	B	B	A	A	A	A	B	B	B	B	A	B	B	B	B	A	-	B	B	-	A	A	B	B	B	A	A	A	A	B	B	B	-	B	A	B	B	B	A	A	B	B	A	B	A
S2_71935982_B	2	71935982	140.474	B	B	B	A	A	A	A	B	B	B	B	A	B	B	B	B	A	-	B	B	-	A	A	B	B	B	A	A	A	A	B	B	B	-	B	A	B	B	B	A	A	B	B	A	B	A
S2_73519395_B	2	73519395	142.559	B	B	-	A	A	A	A	B	B	B	B	A	B	B	B	B	A	-	B	-	-	A	A	B	B	-	A	A	A	A	B	B	B	-	B	A	B	A	B	A	A	B	B	A	B	A
S2_73519405_B	2	73519405	142.559	B	B	-	A	A	A	A	B	B	B	B	A	B	B	B	B	A	-	B	-	-	A	A	B	B	-	A	A	A	A	B	B	B	-	B	A	B	A	B	A	A	B	B	A	B	A
S2_73519902_B	2	73519902	142.559	B	B	-	A	A	A	A	B	B	B	B	A	B	B	B	B	A	B	B	B	-	A	A	B	B	-	A	A	A	A	B	B	B	-	B	A	B	A	B	A	A	B	B	A	B	A
S2_73526111_B	2	73526111	142.559	B	B	-	A	A	A	A	B	B	B	B	A	B	B	B	B	A	B	B	B	A	A	A	B	B	-	A	A	A	A	B	B	B	B	B	A	B	A	B	A	A	B	B	A	B	A
S2_73577293_B	2	73577293	142.559	B	B	-	A	A	A	A	B	B	B	B	A	B	B	B	B	A	B	B	A	B	-	A	B	B	B	A	A	A	A	B	B	B	-	-	A	B	A	B	A	A	B	B	A	B	A
S2_73584592_B	2	73584592	142.559	B	B	-	A	A	A	A	B	B	B	B	A	B	B	B	B	A	B	B	A	B	A	A	B	B	-	A	A	A	A	B	B	B	-	B	A	B	A	B	A	A	B	B	A	B	A
S2_73584602_B	2	73584602	142.559	B	B	-	A	A	A	A	B	B	B	B	A	B	B	B	B	A	B	B	A	B	A	A	B	B	-	A	A	A	A	B	B	B	-	B	A	B	A	B	A	A	B	B	A	B	A
S2_73584609_B	2	73584609	142.559	B	B	-	A	A	A	A	B	B	B	B	A	B	B	B	B	A	B	B	A	B	A	A	B	B	-	A	A	A	A	B	B	B	-	B	A	B	A	B	A	A	B	B	A	B	A
S2_75055873_B	2	75055873	145.721	B	B	A	A	A	A	A	B	B	B	B	A	B	B	B	B	B	B	A	A	B	A	A	B	B	-	A	A	A	A	B	B	B	A	B	A	B	A	B	A	A	B	B	A	B	A
S2_75055893_B	2	75055893	145.721	B	B	A	A	A	A	A	B	B	B	B	A	B	B	B	B	B	B	A	A	B	A	A	B	B	-	A	A	A	A	B	B	B	A	B	A	B	A	B	A	A	B	B	A	B	A
S2_75055901_B	2	75055901	145.721	B	B	A	A	A	A	A	B	B	B	B	A	B	B	B	B	B	B	A	A	B	A	A	B	B	-	A	A	A	A	B	B	B	A	B	A	B	A	B	A	A	B	B	A	B	A
S2_75055906_B	2	75055906	145.721	B	B	A	A	A	A	A	B	B	B	B	A	B	B	B	B	B	B	A	A	B	A	A	B	B	-	A	A	A	A	B	B	B	A	B	A	B	A	B	A	A	B	B	A	B	A
S2_75132307_B	2	75132307	145.721	B	B	A	A	A	A	A	B	B	B	B	A	B	B	B	B	B	B	A	-	B	A	A	B	B	-	A	A	A	A	B	B	B	-	B	A	B	A	B	A	A	B	B	A	B	A
S2_75171615_B	2	75171615	145.721	B	B	A	A	A	A	A	B	B	B	B	A	B	B	B	B	B	B	A	A	B	A	A	B	B	B	A	A	A	A	B	B	B	-	B	A	B	A	B	A	A	B	B	A	B	A
S2_74984958_B	2	74984958	146.211	B	B	A	A	A	A	A	B	B	B	B	A	B	B	B	B	B	B	A	A	B	A	A	B	B	B	A	A	A	A	B	B	B	-	B	A	B	A	B	A	A	B	B	A	B	A
S2_75061896_B	2	75061896	146.211	B	B	A	A	A	A	A	B	B	B	B	A	B	B	B	B	B	B	A	-	B	A	A	B	B	-	A	A	A	A	B	B	B	-	B	A	B	A	B	A	A	B	B	A	B	A
S2_75132338_B	2	75132338	146.211	B	B	A	A	A	A	A	B	B	B	B	A	B	B	B	B	B	B	A	-	B	A	A	B	B	-	A	A	A	A	B	B	B	-	B	A	B	A	B	A	A	B	B	A	B	A
S2_75151197_B	2	75151197	146.211	B	B	A	A	A	A	A	B	B	B	B	A	B	B	B	B	B	B	A	-	B	A	A	B	B	B	A	A	A	A	B	-	B	A	B	A	B	A	B	A	A	B	B	A	B	A
S2_75151214_B	2	75151214	146.211	B	B	A	A	A	A	A	B	B	B	B	A	B	B	B	B	B	B	A	-	B	A	A	B	B	B	A	A	A	A	B	-	B	A	B	A	B	A	B	A	A	B	B	A	B	A
S2_75152993_B	2	75152993	146.211	B	B	A	A	A	A	A	B	B	B	B	A	B	B	B	B	B	B	A	-	B	A	A	B	B	-	A	A	A	A	B	-	B	-	B	A	B	A	B	A	A	B	B	A	B	A
S2_75342750_B	2	75342750	146.211	B	B	A	A	A	A	A	B	B	B	B	A	B	B	B	B	B	B	A	-	B	A	A	B	B	-	A	A	A	A	B	-	B	B	B	A	B	A	B	A	A	B	B	A	B	A
S2_75351579_B	2	75351579	146.211	B	B	A	A	A	A	A	B	B	B	B	A	B	B	B	B	B	B	A	-	B	A	A	B	B	B	A	A	A	A	B	B	B	-	B	A	B	A	B	A	A	B	B	A	B	A
S2_74522540_B	2	74522540	146.696	B	B	A	A	A	A	A	B	B	B	B	A	B	B	B	B	B	B	A	-	B	A	A	B	B	B	A	A	A	A	B	B	B	-	B	A	B	A	B	A	A	B	B	A	B	A
S2_74522547_B	2	74522547	146.696	B	B	A	A	A	A	A	B	B	B	B	A	B	B	B	B	B	B	A	-	B	A	A	B	B	B	A	A	A	A	B	B	B	-	B	A	B	A	B	A	A	B	B	A	B	A
S2_74522599_B	2	74522599	146.696	B	B	A	A	A	A	A	B	B	B	B	A	B	B	B	B	B	B	A	-	B	A	A	B	B	B	A	A	A	A	B	B	B	-	B	A	B	A	B	A	A	B	B	A	B	A
S2_74529135_B	2	74529135	146.696	B	B	A	A	A	A	A	B	B	B	B	A	B	B	B	B	B	B	A	-	B	A	A	B	B	-	A	A	A	A	B	B	B	B	B	A	B	A	B	A	A	B	B	A	B	A
S2_74551639_B	2	74551639	146.696	B	B	A	A	A	A	A	B	B	B	B	A	B	B	B	B	B	B	A	-	B	A	A	B	B	-	A	A	A	A	B	B	B	B	B	A	B	A	B	A	A	B	B	A	B	A
S2_74551675_B	2	74551675	146.696	B	B	A	A	A	A	A	B	B	B	B	A	B	B	B	B	B	B	A	-	B	A	A	B	B	-	A	A	A	A	B	B	B	B	B	A	B	A	B	A	A	B	B	A	B	A
S2_74584795_B	2	74584795	146.696	B	B	A	A	A	A	A	B	B	B	B	A	B	B	B	B	B	B	A	-	B	A	A	B	B	B	A	A	A	A	B	B	B	-	B	A	B	A	B	A	A	B	B	A	B	A
S2_74683601_B	2	74683601	146.696	B	B	A	A	A	A	A	B	B	B	B	A	B	B	B	B	B	B	A	-	B	A	A	B	B	-	A	A	A	A	B	B	B	-	B	A	B	A	B	A	A	B	B	A	B	A
S2_74765440_B	2	74765440	146.696	B	B	A	A	A	A	A	B	B	B	B	A	B	B	B	B	B	B	A	-	B	A	A	B	B	B	A	A	A	A	B	-	B	-	B	A	B	A	B	A	A	B	B	A	B	A
S2_74872554_B	2	74872554	146.696	B	B	A	A	A	A	A	B	B	B	B	A	B	B	B	B	B	B	A	-	B	A	A	B	B	-	A	A	A	A	B	B	B	-	B	A	B	A	B	A	A	B	B	A	B	A
S2_74872555_B	2	74872555	146.696	B	B	A	A	A	A	A	B	B	B	B	A	B	B	B	B	B	B	A	-	B	A	A	B	B	-	A	A	A	A	B	B	B	-	B	A	B	A	B	A	A	B	B	A	B	A
S2_74930550_B	2	74930550	146.696	B	B	A	A	A	A	A	B	B	B	B	A	B	B	B	B	B	B	A	-	B	A	A	B	B	B	A	A	A	A	B	B	B	-	B	A	B	A	B	A	A	B	B	A	B	A
S2_74966780_B	2	74966780	146.696	B	B	A	A	A	A	A	B	B	B	B	A	B	B	B	B	B	B	A	B	B	A	A	B	B	-	A	A	A	A	B	B	B	-	B	A	B	A	B	A	A	B	B	A	B	A
S2_74969834_B	2	74969834	146.696	B	B	A	A	A	A	A	B	B	B	B	A	B	B	B	B	B	B	A	-	B	A	A	B	B	-	A	A	A	A	B	B	B	-	B	A	B	A	B	A	A	B	B	A	B	A
S2_75151459_B	2	75151459	147.182	B	B	A	A	A	A	A	B	B	B	B	A	B	B	B	B	B	B	A	B	B	A	A	B	B	-	A	A	A	A	B	B	B	-	B	A	B	A	B	A	A	B	B	A	B	A
S2_75170660_B	2	75170660	147.182	B	B	A	A	A	A	A	B	B	B	B	A	B	B	B	B	B	B	A	B	B	A	A	B	B	-	A	A	A	A	B	-	B	A	B	A	B	A	B	A	A	B	B	A	B	A
S2_74989512_B	2	74989512	147.672	B	-	A	A	A	A	A	B	B	B	B	A	B	B	B	B	B	B	A	-	B	A	A	B	B	B	A	A	A	A	B	A	B	-	B	A	B	A	B	A	A	B	B	A	B	A
S2_75074223_B	2	75074223	147.672	B	B	A	A	A	A	A	B	B	B	B	A	B	B	B	B	B	B	A	A	B	A	A	B	B	B	A	A	A	A	B	A	B	-	B	A	B	A	B	A	A	B	B	A	B	A
S2_75191444_B	2	75191444	147.672	B	B	A	A	A	A	A	B	B	B	B	A	B	B	B	B	B	B	A	-	B	A	A	B	B	-	A	A	A	A	B	-	B	-	B	A	B	A	B	A	A	B	B	A	B	A
S2_76607108_B	2	76607108	150.363	B	B	A	A	A	A	B	B	B	B	B	A	B	B	B	B	B	-	A	A	B	A	A	B	B	B	B	A	A	A	B	A	B	A	B	A	B	-	B	A	A	B	B	-	B	A
S2_76607651_B	2	76607651	150.363	B	B	A	A	A	A	B	-	B	B	B	A	B	B	B	B	B	A	-	A	B	A	A	B	B	B	B	A	A	A	B	A	B	A	B	A	B	A	B	A	A	-	B	B	B	A
S2_76613872_B	2	76613872	150.363	B	B	A	A	A	A	B	B	B	B	B	A	B	B	B	B	B	A	A	A	B	A	A	B	B	B	B	A	A	A	B	-	B	-	B	A	B	-	B	A	A	-	B	-	B	A
S2_76607773_B	2	76607773	151.353	B	B	A	A	A	A	B	A	B	B	B	A	B	B	B	B	B	A	A	A	B	A	A	B	B	B	B	A	A	A	B	B	B	A	B	A	B	-	B	A	A	B	B	-	B	A
S2_76607774_B	2	76607774	151.353	B	B	A	A	A	A	B	A	B	B	B	A	B	B	B	B	B	A	A	A	B	A	A	B	B	B	B	A	A	A	B	B	B	A	B	A	B	-	B	A	A	B	B	-	B	A
S2_76607776_B	2	76607776	151.353	B	B	A	A	A	A	B	A	B	B	B	A	B	B	B	B	B	A	A	A	B	A	A	B	B	B	B	A	A	A	B	B	B	A	B	A	B	-	B	A	A	B	B	-	B	A
S2_76607778_B	2	76607778	151.353	B	B	A	A	A	A	B	A	B	B	B	A	B	B	B	B	B	A	A	A	B	A	A	B	B	B	B	A	A	A	B	B	B	A	B	A	B	-	B	A	A	B	B	-	B	A
S3_3720432	3	3720432	0	B	A	B	A	A	A	A	B	B	A	B	A	A	A	A	B	A	B	A	B	A	A	-	B	A	-	A	A	B	B	-	B	B	A	B	A	A	A	A	A	B	A	B	A	-	A
S3_3784661	3	3784661	0	B	A	B	A	A	A	A	B	B	A	B	A	A	A	A	-	A	B	A	B	A	A	A	B	A	-	A	A	B	B	-	B	B	A	B	A	A	A	A	A	B	A	B	A	-	A
S3_3784662	3	3784662	0	B	A	B	A	A	A	A	B	B	A	B	A	A	A	A	-	A	B	A	B	A	A	A	B	A	-	A	A	B	B	-	B	B	A	B	A	A	A	A	A	B	A	B	A	-	A
S3_3784666	3	3784666	0	B	A	B	A	A	A	A	B	B	A	B	A	A	A	A	-	A	B	A	B	A	A	A	B	A	-	A	A	B	B	-	B	B	A	B	A	A	A	A	A	B	A	B	A	-	A
S3_3720363	3	3720363	0.505	B	A	B	A	A	A	A	B	B	A	B	A	A	A	A	-	B	B	A	B	A	A	-	B	A	-	A	A	B	B	-	B	B	A	B	A	A	A	A	A	B	A	B	A	-	A
S3_3720394	3	3720394	0.505	B	A	B	A	A	A	A	B	B	A	B	A	A	A	A	-	B	B	A	B	A	A	-	B	A	-	A	A	B	B	-	B	B	A	B	A	A	A	A	A	B	A	B	A	-	A
S3_3720395	3	3720395	0.505	B	A	B	A	A	A	A	B	B	A	B	A	A	A	A	-	B	B	A	B	A	A	-	B	A	-	A	A	B	B	-	B	B	A	B	A	A	A	A	A	B	A	B	A	-	A
S3_3441862	3	3441862	1.026	B	-	B	A	A	A	A	B	B	A	B	A	A	A	A	B	A	B	A	B	A	A	-	B	A	A	A	A	B	B	-	B	B	A	B	A	A	A	A	A	B	A	B	A	B	A
S3_3653579	3	3653579	1.026	B	A	B	A	A	A	A	B	B	A	B	A	A	A	A	-	A	B	A	B	A	A	B	B	A	-	A	A	B	B	A	B	B	A	B	A	A	A	A	A	B	A	B	A	B	A
S3_3666388	3	3666388	1.026	B	-	B	A	A	A	A	B	B	A	B	A	A	A	A	-	-	B	A	B	A	A	-	B	A	-	A	A	B	B	-	B	B	A	B	A	A	A	A	A	B	A	B	A	B	A
S3_4017293	3	4017293	1.026	B	-	B	A	A	A	A	B	B	A	B	A	A	A	A	-	A	B	A	B	A	A	-	B	A	-	A	A	B	B	A	B	B	A	B	A	A	A	A	A	B	A	B	A	B	A
S3_4712046	3	4712046	4.327	B	B	B	A	A	A	A	B	B	A	B	A	A	A	A	A	B	B	A	B	A	A	A	B	A	-	A	A	B	B	A	B	B	A	B	A	A	A	A	B	B	A	B	A	B	A
S3_4712047	3	4712047	4.327	B	B	B	A	A	A	A	B	B	A	B	A	A	A	A	A	B	B	A	B	A	A	A	B	A	-	A	A	B	B	A	B	B	A	B	A	A	A	A	B	B	A	B	A	B	A
S3_4712048	3	4712048	4.327	B	B	B	A	A	A	A	B	B	A	B	A	A	A	A	A	B	B	A	B	A	A	A	B	A	-	A	A	B	B	A	B	B	A	B	A	A	A	A	B	B	A	B	A	B	A
S3_4712049	3	4712049	4.327	B	B	B	A	A	A	A	B	B	A	B	A	A	A	A	A	B	B	A	B	A	A	A	B	A	-	A	A	B	B	A	B	B	A	B	A	A	A	A	B	B	A	B	A	B	A
S3_5434737_B	3	5434737	6.369	B	B	B	A	A	A	A	B	B	A	B	A	A	A	A	A	B	B	A	B	A	A	B	B	A	B	B	A	B	B	A	B	B	A	B	A	A	B	A	-	B	A	B	A	B	A
S3_5501156_B	3	5501156	6.369	B	B	B	A	A	A	A	B	B	A	B	A	A	A	A	A	B	B	A	B	A	A	B	B	A	B	B	A	B	B	A	B	B	A	B	A	A	B	A	B	B	-	B	-	-	A
S3_5606496	3	5606496	6.369	B	-	B	A	A	A	A	B	B	A	B	A	A	A	A	A	B	B	A	B	A	A	-	B	A	-	B	A	B	B	A	B	B	A	B	A	A	B	A	-	B	A	B	A	B	A
S3_5606510	3	5606510	6.369	B	-	B	A	A	A	A	B	B	A	B	A	A	A	A	A	B	B	A	B	A	A	-	B	A	-	B	A	B	B	A	B	B	A	B	A	A	B	A	-	B	A	B	A	B	A
S3_5508147	3	5508147	6.864	B	B	B	A	A	A	A	B	B	A	B	A	A	A	A	A	B	B	A	B	A	A	B	B	A	-	B	A	B	B	A	B	B	A	B	A	A	B	A	-	B	A	B	A	B	A
S3_5585117	3	5585117	6.864	B	B	B	A	A	A	A	B	B	A	B	A	A	A	A	A	B	B	A	B	A	A	-	B	A	-	B	A	B	B	A	B	B	A	B	A	A	B	A	-	B	A	B	A	-	A
S3_5640602	3	5640602	6.864	B	-	B	A	A	A	A	B	B	A	B	A	A	A	A	A	B	B	A	B	A	A	-	B	A	A	B	A	B	B	A	B	B	A	B	A	A	B	A	-	B	A	B	A	-	A
S3_5643185	3	5643185	6.864	B	-	B	A	A	A	A	B	B	A	B	A	A	A	A	A	B	B	A	B	A	A	-	B	A	B	B	A	B	B	A	B	B	A	B	A	A	B	A	A	B	-	B	A	B	A
S3_5677369	3	5677369	6.864	B	-	B	A	A	A	A	B	B	A	-	A	A	A	A	A	B	B	A	B	A	A	B	B	A	-	B	A	B	B	A	B	B	A	B	A	A	B	A	-	B	A	-	A	B	A
S3_5793826_B	3	5793826	9.498	B	-	B	A	A	A	A	B	B	A	B	A	B	B	A	B	B	B	A	B	B	A	B	B	A	B	B	A	B	B	A	B	B	A	B	A	A	B	A	-	B	-	B	A	B	A
S3_5793827_B	3	5793827	9.498	B	-	B	A	A	A	A	B	B	A	B	A	B	B	A	B	B	B	A	B	B	A	B	B	A	B	B	A	B	B	A	B	B	A	B	A	A	B	A	-	B	-	B	A	B	A
S3_5793828_B	3	5793828	9.498	B	-	B	A	A	A	A	B	B	A	B	A	B	B	A	B	B	B	A	B	B	A	B	B	A	B	B	A	B	B	A	B	B	A	B	A	A	B	A	-	B	-	B	A	B	A
S3_5793829_B	3	5793829	9.498	B	-	B	A	A	A	A	B	B	A	B	A	B	B	A	B	B	B	A	B	B	A	B	B	A	B	B	A	B	B	A	B	B	A	B	A	A	B	A	-	B	-	B	A	B	A
S3_5798006_B	3	5798006	9.498	B	A	B	A	A	A	A	B	B	A	B	A	B	B	A	B	B	B	A	B	B	A	B	B	A	B	B	A	B	B	A	B	B	A	B	A	A	B	A	B	B	A	B	A	-	A
S3_6460899_B	3	6460899	10.53	B	B	B	A	A	A	A	B	B	A	B	A	B	B	A	B	B	B	B	B	B	A	B	B	A	-	B	A	B	B	A	B	B	A	B	A	A	B	A	-	B	-	B	A	-	A
S3_6460941_B	3	6460941	10.53	B	B	B	A	A	A	A	B	B	A	B	A	B	B	A	B	B	B	B	B	-	A	B	B	A	-	B	A	B	B	A	B	B	A	B	A	A	B	A	-	B	-	B	A	-	A
S3_6729601_B	3	6729601	10.53	B	-	B	A	A	A	A	B	B	A	B	A	B	B	A	B	B	B	B	B	-	A	-	B	A	-	B	A	B	B	A	B	B	A	B	A	A	B	A	A	B	-	B	A	-	A
S3_6737465_B	3	6737465	10.53	B	-	B	A	A	A	A	B	B	A	B	A	B	B	A	B	B	B	B	B	B	A	-	B	A	-	B	A	B	B	A	B	B	A	B	A	A	B	A	A	B	-	B	A	B	A
S3_6739182_B	3	6739182	10.53	B	B	B	A	A	A	A	B	B	A	B	A	B	B	A	B	B	B	B	B	B	A	B	B	A	-	B	A	B	B	A	B	B	A	B	A	A	B	A	A	B	-	B	A	-	A
S3_6813012_B	3	6813012	11.025	B	-	B	A	A	A	A	B	B	A	B	A	B	B	A	B	B	B	B	B	-	A	B	B	A	A	B	A	B	B	A	B	B	A	B	A	A	B	A	A	B	A	B	A	B	A
S3_6813016_B	3	6813016	11.025	B	-	B	A	A	A	A	B	B	A	B	A	B	B	A	B	B	B	B	B	-	A	B	B	A	A	B	A	B	B	A	B	B	A	B	A	A	B	A	A	B	A	B	A	B	A
S3_6837519_B	3	6837519	11.505	B	-	B	A	A	A	A	B	B	A	B	A	B	B	A	B	B	B	B	B	B	A	-	B	A	A	B	A	B	B	A	B	B	A	B	A	A	B	A	A	B	A	B	A	A	A
S3_7057183_B	3	7057183	11.991	B	-	-	A	A	A	A	B	B	A	B	A	B	B	A	B	B	B	B	B	B	A	-	B	A	A	B	A	B	B	A	B	B	A	B	A	A	B	A	A	B	A	B	A	-	A
S3_7120787_B	3	7120787	11.991	B	A	A	A	A	A	A	B	B	A	B	A	B	B	A	B	B	B	B	B	-	A	-	B	A	A	B	A	B	B	A	B	B	A	B	A	A	B	A	A	B	A	B	A	-	A
S3_7188557	3	7188557	11.991	B	B	A	A	A	A	A	B	B	A	B	A	B	B	A	B	B	B	B	B	-	A	-	B	A	A	B	A	B	-	A	B	B	A	B	A	A	B	A	A	B	-	B	A	A	A
S3_7386143	3	7386143	14.097	B	A	A	A	A	A	A	B	B	A	B	A	B	B	A	B	B	B	B	B	-	A	B	B	B	B	B	A	B	B	A	B	-	A	B	A	A	B	A	A	B	A	B	A	-	A
S3_7386144	3	7386144	14.097	B	A	A	A	A	A	A	B	B	A	B	A	B	B	A	B	B	B	B	B	-	A	B	B	B	B	B	A	B	B	A	B	-	A	B	A	A	B	A	A	B	A	B	A	-	A
S3_7399710_B	3	7399710	14.097	B	-	A	A	A	A	A	B	B	A	B	A	B	B	A	B	B	B	B	B	B	A	B	B	B	B	B	A	B	B	A	B	A	A	B	A	A	B	A	A	B	-	B	A	-	A
S3_7871837_B	3	7871837	16.249	B	B	A	A	A	A	A	B	B	A	B	A	B	B	A	B	B	B	B	B	-	A	A	B	B	B	B	A	B	B	A	B	A	A	B	A	B	B	A	A	B	-	B	-	-	A
S3_7880722_B	3	7880722	16.249	B	B	A	A	A	A	A	B	B	A	B	A	B	B	A	B	B	B	B	B	B	A	A	B	B	B	B	A	B	B	A	B	A	A	B	A	B	B	A	A	B	B	B	-	B	A
S3_7926460	3	7926460	16.249	B	B	A	A	A	A	A	B	B	A	B	A	B	B	A	B	B	B	B	B	B	A	A	B	B	B	B	A	B	B	A	B	A	A	B	A	B	B	A	A	B	A	B	-	-	A
S3_7927136	3	7927136	16.249	B	B	A	A	A	A	A	B	B	A	B	A	B	B	A	B	B	B	B	B	-	A	A	B	B	B	B	A	B	B	A	B	A	A	B	A	B	B	A	A	B	-	B	B	-	A
S3_8071735_B	3	8071735	16.249	B	B	A	A	A	A	A	B	B	A	B	A	B	B	A	B	B	B	B	B	B	A	A	B	B	B	B	A	B	B	A	B	A	A	B	A	B	B	A	A	B	A	B	B	-	A
S3_8071752	3	8071752	16.249	B	B	A	A	A	A	A	B	B	A	B	A	B	B	A	B	B	B	B	B	B	A	A	B	B	B	B	A	B	B	A	B	A	A	B	A	B	B	A	A	B	A	B	B	-	A
S3_8071770_B	3	8071770	16.249	B	B	A	A	A	A	A	B	B	A	B	A	B	B	A	B	B	B	B	B	B	A	A	B	B	B	B	A	B	B	A	B	A	A	B	A	B	B	A	A	B	A	B	-	-	A
S3_8071779_B	3	8071779	16.249	B	B	A	A	A	A	A	B	B	A	B	A	B	B	A	B	B	B	B	B	B	A	A	B	B	B	B	A	B	B	A	B	A	A	B	A	B	B	A	A	B	A	B	-	-	A
S3_7819106_B	3	7819106	16.77	B	B	A	A	A	A	A	B	B	A	B	A	B	B	A	B	B	B	B	B	-	A	A	B	B	B	B	A	B	B	A	B	A	A	B	A	B	B	A	A	B	A	B	-	-	A
S3_7831781_B	3	7831781	16.77	B	B	A	A	A	A	A	B	B	A	B	A	B	B	A	B	B	B	-	B	-	A	A	B	B	B	B	A	B	B	A	B	A	A	B	A	B	B	A	A	B	A	B	A	-	A
S3_7871901_B	3	7871901	16.77	B	B	A	A	A	A	A	B	B	A	B	A	B	B	A	B	B	B	B	B	-	A	A	B	B	B	B	A	B	B	A	B	A	A	B	A	B	B	A	A	B	-	B	-	B	A
S3_8627690_B	3	8627690	18.333	B	A	A	A	A	A	A	B	B	A	B	A	B	B	A	B	B	B	B	B	B	A	B	B	B	B	B	A	B	B	A	B	A	A	B	A	B	B	A	A	B	-	B	-	A	A
S3_8627698_B	3	8627698	18.333	B	A	A	A	A	A	A	B	B	A	B	A	B	B	A	B	B	B	B	B	B	A	B	B	B	B	B	A	B	B	A	B	A	A	B	A	B	B	A	A	B	-	B	-	A	A
S3_8639834_B	3	8639834	18.333	B	A	A	A	A	A	A	-	B	A	B	A	B	B	A	B	B	B	B	B	B	A	B	B	B	B	B	A	B	B	A	B	A	A	B	A	B	B	A	A	B	-	B	-	A	A
S3_8579079_B	3	8579079	18.843	B	A	A	A	A	A	A	B	B	A	B	A	B	B	A	B	B	B	B	B	B	A	B	B	B	B	B	A	B	B	A	B	A	A	B	A	B	B	A	A	B	B	B	A	-	A
S3_8407779_B	3	8407779	19.854	B	A	A	A	A	A	A	B	B	A	B	A	B	B	A	B	B	B	B	B	B	A	B	B	B	B	B	A	B	B	A	B	A	A	B	A	B	B	A	A	B	A	B	A	B	A
S3_8407815_B	3	8407815	19.854	B	A	A	A	A	A	A	B	B	A	B	A	B	B	A	B	B	B	B	B	B	A	B	B	B	B	B	A	B	B	A	B	A	A	B	A	B	B	A	A	B	A	B	A	B	A
S3_8407816_B	3	8407816	19.854	B	A	A	A	A	A	A	B	B	A	B	A	B	B	A	B	B	B	B	B	B	A	B	B	B	B	B	A	B	B	A	B	A	A	B	A	B	B	A	A	B	A	B	A	B	A
S3_8456239_B	3	8456239	19.854	B	A	A	A	A	A	A	B	B	A	B	A	B	B	A	B	B	B	B	B	B	A	B	B	B	B	B	A	B	B	A	B	A	A	B	A	B	B	A	A	B	A	B	-	B	A
S3_8618323_B	3	8618323	21.835	B	A	A	A	A	A	A	B	B	A	B	A	B	B	A	B	B	B	B	B	B	A	B	B	B	B	B	A	B	B	A	B	A	A	B	A	B	B	A	A	B	A	B	B	A	A
S3_8618326_B	3	8618326	21.835	B	A	A	A	A	A	A	B	B	A	B	A	B	B	A	B	B	B	B	B	B	A	B	B	B	B	B	A	B	B	A	B	A	A	B	A	B	B	A	A	B	A	B	B	A	A
S3_8618329_B	3	8618329	21.835	B	A	A	A	A	A	A	B	B	A	B	A	B	B	A	B	B	B	B	B	B	A	B	B	B	B	B	A	B	B	A	B	A	A	B	A	B	B	A	A	B	A	B	B	A	A
S3_8618335_B	3	8618335	21.835	B	A	A	A	A	A	A	B	B	A	B	A	B	B	A	B	B	B	B	B	B	A	B	B	B	B	B	A	B	B	A	B	A	A	B	A	B	B	A	A	B	A	B	B	A	A
S3_8412256_B	3	8412256	23.366	B	A	A	A	A	A	A	B	B	A	B	A	B	B	A	B	B	B	B	B	B	A	B	B	B	B	B	A	B	B	A	B	A	A	B	A	B	B	A	A	B	-	B	-	B	A
S3_8584445_B	3	8584445	23.366	B	A	A	A	A	A	A	B	B	A	B	A	B	B	A	B	B	B	B	B	B	A	B	B	B	B	B	A	B	B	A	B	A	A	B	A	B	B	A	A	B	-	B	B	B	A
S3_8584468_B	3	8584468	23.366	B	A	A	A	A	A	A	B	B	A	B	A	B	B	A	B	B	B	B	B	B	A	B	B	B	B	B	A	B	B	A	B	A	A	B	A	B	B	A	A	B	-	B	B	B	A
S3_8664458_B	3	8664458	23.366	B	A	A	A	A	A	A	B	B	A	B	A	B	B	A	B	B	B	B	B	B	A	B	B	B	B	B	A	B	B	A	B	A	A	B	A	B	B	A	A	B	A	B	B	B	A
S3_8664480_B	3	8664480	23.366	B	A	A	A	A	A	A	B	B	A	B	A	B	B	A	B	B	B	B	B	B	A	B	B	B	B	B	A	B	B	A	B	A	A	B	A	B	B	A	A	B	A	B	B	B	A
S3_8710741	3	8710741	24.929	B	A	A	A	A	A	A	B	B	A	B	A	B	B	A	B	B	B	B	B	B	A	B	B	B	B	B	A	B	B	A	B	A	A	B	A	B	B	A	A	B	-	B	-	A	A
S3_8710766	3	8710766	24.929	B	A	A	A	A	A	A	B	B	A	B	A	B	B	A	B	B	B	B	B	B	A	B	B	B	B	B	A	B	B	A	B	A	A	B	A	B	B	A	A	B	-	B	-	A	A
S3_8739646	3	8739646	24.929	B	A	A	A	A	A	A	B	B	A	B	A	B	B	A	B	B	B	B	B	B	A	B	B	B	B	B	A	B	B	A	B	A	A	B	A	B	B	A	A	B	A	B	A	-	A
S3_8739663	3	8739663	24.929	B	A	A	A	A	A	A	B	B	A	B	A	B	B	A	B	B	B	B	B	B	A	B	B	B	B	B	A	B	B	A	B	A	A	B	A	B	B	A	A	B	A	B	A	-	A
S3_8739675	3	8739675	24.929	B	A	A	A	A	A	A	B	B	A	B	A	B	B	A	B	B	B	B	B	B	A	B	B	B	B	B	A	B	B	A	B	A	A	B	A	B	B	A	A	B	A	B	A	-	A
S3_8739690	3	8739690	24.929	B	A	A	A	A	A	A	B	B	A	B	A	B	B	A	B	B	B	B	B	B	A	B	B	B	B	B	A	B	B	A	B	A	A	B	A	B	B	A	A	B	A	B	A	-	A
S3_8905575	3	8905575	26.95	B	A	A	A	A	A	A	B	B	A	B	A	B	B	A	B	B	B	B	B	B	B	B	B	B	B	B	A	B	B	A	B	A	A	B	A	B	B	A	A	B	-	B	A	B	A
S3_8915314	3	8915314	27.95	B	A	A	A	A	A	A	B	B	A	B	A	B	B	A	B	B	B	B	B	B	-	B	B	B	B	B	A	B	B	A	B	A	A	B	A	B	B	A	A	B	-	B	A	B	A
S3_8915323	3	8915323	27.95	B	A	A	A	A	A	A	B	B	A	B	A	B	B	A	B	B	B	B	B	B	-	B	B	B	B	B	A	B	B	A	B	A	A	B	A	B	B	A	A	B	-	B	A	B	A
S3_8915347	3	8915347	27.95	B	A	A	A	A	A	A	B	B	A	B	A	B	B	A	B	B	B	B	B	B	-	B	B	B	B	B	A	B	B	A	B	A	A	B	A	B	B	A	A	B	-	B	A	B	A
S3_8961770	3	8961770	27.95	B	A	A	A	A	A	A	B	B	A	B	A	B	B	A	B	B	B	B	B	B	A	B	B	B	B	B	A	B	B	A	B	A	A	B	A	B	B	A	A	B	A	B	A	B	A
S3_8962364	3	8962364	27.95	B	A	A	A	A	A	A	B	B	A	B	A	B	B	A	B	B	B	B	B	B	A	B	B	B	B	B	A	B	B	A	B	A	A	B	A	B	B	A	A	B	-	B	-	B	A
S3_9490817	3	9490817	27.95	B	A	A	A	A	A	A	B	B	A	B	A	B	B	A	B	B	B	B	B	B	A	B	B	B	B	B	A	B	B	A	B	A	A	B	A	B	B	A	A	B	A	B	-	B	A
S3_9490829	3	9490829	27.95	B	A	A	A	A	A	A	B	B	A	B	A	B	B	A	B	B	B	B	B	B	A	B	B	B	B	B	A	B	B	A	B	A	A	B	A	B	B	A	A	B	A	B	-	B	A
S3_9935164	3	9935164	32.804	B	A	A	A	A	A	A	B	A	A	B	A	B	B	A	B	B	B	B	-	B	A	B	B	B	B	B	A	B	B	A	B	A	A	B	A	B	B	B	A	B	-	B	B	A	A
S3_9955986_B	3	9955986	32.804	B	A	A	A	A	A	A	B	A	A	B	A	B	B	A	B	B	B	B	B	B	-	B	B	B	B	B	A	B	B	A	B	A	A	B	A	B	B	B	A	B	A	B	B	A	A
S3_9957457_B	3	9957457	32.804	B	A	A	A	A	A	A	B	A	A	B	A	B	B	A	B	B	B	B	-	B	-	B	B	B	B	B	A	B	B	A	B	A	A	B	A	B	B	B	A	B	A	B	B	-	A
S3_10086744_B	3	10086744	34.32	B	A	A	A	A	A	A	B	A	A	B	A	B	B	A	B	B	B	B	-	-	A	B	B	B	B	B	A	B	B	A	B	A	A	B	A	B	B	B	A	B	-	B	B	A	A
S3_10270961	3	10270961	34.32	B	A	A	A	A	A	A	B	A	A	B	A	B	B	A	B	B	B	B	-	A	-	B	B	B	B	B	A	B	B	A	-	A	A	B	A	B	B	B	A	B	-	B	B	A	A
S3_10271016	3	10271016	34.32	B	A	A	A	A	A	A	B	A	A	B	A	B	B	A	B	B	B	B	-	A	A	B	B	B	B	B	A	B	B	A	-	A	A	B	A	B	B	B	A	B	-	B	B	A	A
S3_10322341	3	10322341	34.32	B	A	A	A	A	A	A	B	A	A	B	A	B	B	A	B	B	B	B	-	A	-	B	B	B	B	B	A	B	B	A	-	A	A	B	A	B	B	B	A	B	-	B	B	-	A
S3_10322349_B	3	10322349	34.32	B	A	A	A	A	A	A	B	A	A	B	A	B	B	A	B	B	B	B	-	A	-	B	B	B	B	B	A	B	B	A	-	A	A	B	A	B	B	B	A	B	-	B	B	-	A
S3_10322370_B	3	10322370	34.32	B	A	A	A	A	A	A	B	A	A	B	A	B	B	A	B	B	B	B	-	A	-	B	B	B	B	B	A	B	B	A	-	A	A	B	A	B	B	B	A	B	-	B	B	-	A
S3_10322372_B	3	10322372	34.32	B	A	A	A	A	A	A	B	A	A	B	A	B	B	A	B	B	B	B	-	A	-	B	B	B	B	B	A	B	B	A	-	A	A	B	A	B	B	B	A	B	-	B	B	-	A
S3_10550281	3	10550281	35.851	B	A	A	A	A	A	A	B	A	A	B	A	B	B	A	B	B	B	B	-	A	A	A	B	B	B	B	A	B	B	A	A	A	A	B	A	B	B	B	A	B	A	B	B	-	A
S3_10780828	3	10780828	35.851	B	A	A	A	A	A	A	B	A	A	B	A	B	B	A	B	B	B	B	B	A	-	A	B	B	B	-	A	B	B	A	A	A	A	B	A	B	B	B	A	B	A	B	B	A	A
S3_10780840	3	10780840	35.851	B	A	A	A	A	A	A	B	A	A	B	A	B	B	A	B	B	B	B	B	A	-	A	B	B	B	-	A	B	B	A	A	A	A	B	A	B	B	B	A	B	A	B	B	A	A
S3_10986286	3	10986286	35.851	B	A	A	A	A	A	A	B	A	A	B	A	B	B	A	B	B	B	B	B	A	-	A	B	B	B	B	A	B	B	A	A	A	A	B	A	B	B	B	A	B	A	B	B	A	A
S3_11141863_B	3	11141863	35.851	B	A	A	A	A	A	A	B	A	A	B	A	B	B	A	B	B	B	B	B	A	A	A	B	B	B	B	A	B	B	A	A	A	A	B	A	B	B	B	A	B	A	B	B	B	A
S3_11141899_B	3	11141899	35.851	B	A	A	A	A	A	A	B	A	A	B	A	B	B	A	B	B	B	B	B	A	A	A	B	B	B	B	A	B	B	A	A	A	A	B	A	B	B	B	A	B	A	B	B	B	A
S3_11559423	3	11559423	37.336	B	A	A	A	A	A	A	B	A	A	B	A	B	B	A	B	B	B	B	A	A	A	A	B	B	B	B	A	B	B	A	A	A	A	B	A	B	B	B	A	B	A	B	B	-	A
S3_12025044_B	3	12025044	37.336	B	A	A	A	A	A	A	B	A	A	B	A	B	B	A	B	B	B	B	-	A	-	A	B	B	B	B	A	B	B	A	A	A	A	B	A	B	B	B	A	B	A	B	B	B	A
S3_11473501_B	3	11473501	37.836	B	A	A	A	A	A	A	B	A	A	B	A	B	B	A	B	B	B	B	-	A	-	A	B	B	B	B	A	B	B	A	A	A	A	B	A	B	B	B	A	B	A	B	B	-	A
S3_11473502_B	3	11473502	37.836	B	A	A	A	A	A	A	B	A	A	B	A	B	B	A	B	B	B	B	-	A	-	A	B	B	B	B	A	B	B	A	A	A	A	B	A	B	B	B	A	B	A	B	B	-	A
S3_11473503_B	3	11473503	37.836	B	A	A	A	A	A	A	B	A	A	B	A	B	B	A	B	B	B	B	-	A	-	A	B	B	B	B	A	B	B	A	A	A	A	B	A	B	B	B	A	B	A	B	B	-	A
S3_11598971_B	3	11598971	38.847	B	A	A	A	A	A	A	B	A	A	B	A	B	B	A	B	B	B	B	-	A	-	A	B	B	B	B	A	B	B	A	-	A	A	B	A	B	B	B	A	B	A	B	B	A	A
S3_11731048_B	3	11731048	38.847	B	A	A	A	A	A	A	B	A	A	B	A	B	B	A	B	B	B	B	-	A	B	A	B	B	B	B	A	B	B	A	A	A	A	B	A	B	B	B	A	B	A	B	B	A	A
S3_11731049_B	3	11731049	38.847	B	A	A	A	A	A	A	B	A	A	B	A	B	B	A	B	B	B	B	-	A	B	A	B	B	B	B	A	B	B	A	A	A	A	B	A	B	B	B	A	B	A	B	B	A	A
S3_11761083_B	3	11761083	38.847	B	A	A	A	A	A	A	B	A	A	B	A	B	B	A	B	B	B	B	B	A	B	A	B	B	B	B	A	B	B	A	A	A	A	B	A	B	B	B	A	B	A	B	B	A	A
S3_11869811_B	3	11869811	38.847	B	A	A	-	A	A	A	B	A	A	B	A	B	B	A	B	B	B	B	B	A	-	A	B	B	B	B	A	B	B	A	A	A	A	B	A	B	B	B	A	B	A	B	B	A	A
S3_11408140_B	3	11408140	39.847	B	A	A	A	A	A	A	B	A	A	B	A	B	B	A	B	B	B	B	B	A	-	A	B	B	B	B	A	B	B	A	A	A	A	B	A	B	B	B	A	B	A	B	B	-	A
S3_11590044_B	3	11590044	39.847	B	A	A	A	A	A	A	B	A	A	B	A	B	B	A	B	B	B	B	-	A	A	A	B	B	B	B	A	B	B	A	A	A	A	B	A	B	B	B	A	B	A	B	B	-	A
S3_11698389_B	3	11698389	39.847	B	A	A	A	A	A	A	B	A	A	B	A	B	B	A	B	B	B	B	B	A	A	A	B	B	B	B	A	B	B	A	A	A	A	B	A	B	B	B	A	B	A	B	B	B	A
S3_11721059_B	3	11721059	39.847	B	A	A	A	A	A	A	B	A	A	B	A	B	B	A	B	B	B	B	B	A	-	A	B	B	B	B	A	B	B	A	A	A	A	B	A	B	B	B	A	B	A	B	B	B	A
S3_11721073_B	3	11721073	39.847	B	A	A	A	A	A	A	B	A	A	B	A	B	B	A	B	B	B	B	B	A	-	A	B	B	B	B	A	B	B	A	A	A	A	B	A	B	B	B	A	B	A	B	B	B	A
S3_11353835_B	3	11353835	40.332	B	A	A	A	A	A	A	B	A	A	B	A	B	B	A	B	B	B	B	B	A	A	A	B	B	B	B	A	B	B	A	-	A	A	B	A	B	B	B	A	B	A	B	B	A	A
S3_11401587_B	3	11401587	40.332	B	A	A	A	A	A	A	B	A	A	B	A	B	B	A	B	B	B	B	-	A	A	A	B	B	B	B	A	B	B	A	A	A	A	B	A	B	B	B	A	B	A	B	B	-	A
S3_13212880_B	3	13212880	43.947	B	A	A	A	A	A	A	B	A	A	B	B	B	B	A	B	B	B	B	-	A	-	A	B	B	B	B	B	B	B	A	A	A	A	B	A	B	A	B	A	B	A	B	B	-	A
S3_13434003_B	3	13434003	43.947	B	A	A	A	A	A	A	B	A	A	B	B	B	B	A	B	B	B	B	-	A	-	A	B	B	B	B	B	B	B	A	A	A	A	B	A	B	A	B	A	B	A	B	B	-	A
S3_13501860	3	13501860	43.947	B	A	A	A	A	A	A	B	A	A	B	B	B	B	A	B	B	B	B	A	A	B	A	B	B	B	B	B	B	B	A	A	A	A	B	A	B	A	B	A	B	A	B	B	A	A
S3_13097960_B	3	13097960	44.442	B	A	A	A	A	A	A	B	A	A	B	B	B	B	A	B	B	B	B	B	A	-	A	B	B	B	B	B	B	B	A	A	A	A	B	A	B	A	B	A	B	A	B	B	-	A
S3_13097966_B	3	13097966	44.442	B	A	A	A	A	A	A	B	A	A	B	B	B	B	A	B	B	B	B	B	A	-	A	B	B	B	B	B	B	B	A	A	A	A	B	A	B	A	B	A	B	A	B	B	-	A
S3_13178434_B	3	13178434	44.442	B	A	A	A	A	A	A	B	A	A	B	B	B	B	A	B	B	B	B	-	A	-	A	B	B	B	B	B	B	B	A	A	A	A	B	A	B	A	B	A	B	A	B	B	-	A
S3_13302732_B	3	13302732	44.442	B	A	A	A	A	A	A	B	A	A	B	B	B	B	A	B	B	B	B	B	A	-	A	B	B	B	B	B	B	B	A	A	A	A	B	A	B	A	B	A	B	A	B	B	-	A
S3_13306600_B	3	13306600	44.442	B	A	A	A	A	A	A	B	A	A	B	B	B	B	A	B	B	B	B	B	A	-	A	B	B	-	B	B	B	B	A	A	A	A	B	A	B	A	B	A	B	A	B	B	A	A
S3_13765858_B	3	13765858	46.548	B	A	A	A	A	A	A	B	A	A	B	B	B	B	A	B	B	B	B	-	B	A	A	B	B	B	B	B	B	B	A	A	A	A	B	A	B	A	B	A	B	A	B	B	-	-
S3_15413168_B	3	15413168	46.548	B	A	A	A	A	A	A	B	A	A	B	B	B	B	A	B	B	B	B	B	B	A	A	B	B	B	B	B	B	B	A	A	A	A	B	A	B	A	B	A	B	A	B	B	-	A
S3_15413169_B	3	15413169	46.548	B	A	A	A	A	A	A	B	A	A	B	B	B	B	A	B	B	B	B	B	B	A	A	B	B	B	B	B	B	B	A	A	A	A	B	A	B	A	B	A	B	A	B	B	-	A
S3_15413170_B	3	15413170	46.548	B	A	A	A	A	A	A	B	A	A	B	B	B	B	A	B	B	B	B	B	B	A	A	B	B	B	B	B	B	B	A	A	A	A	B	A	B	A	B	A	B	A	B	B	-	A
S3_13653216_B	3	13653216	47.048	B	A	A	A	A	A	A	B	A	A	B	B	B	B	A	B	B	B	B	B	B	A	A	B	B	B	B	B	B	B	A	A	A	A	B	A	B	A	B	A	B	A	B	B	B	A
S3_13673201_B	3	13673201	47.048	B	A	A	A	A	A	A	B	A	A	B	B	B	B	A	B	B	B	B	B	B	A	A	B	B	B	B	B	B	B	A	A	A	A	B	A	B	A	B	A	B	A	B	B	B	A
S3_13673205_B	3	13673205	47.048	B	A	A	A	A	A	A	B	A	A	B	B	B	B	A	B	B	B	B	B	B	A	A	B	B	B	B	B	B	B	A	A	A	A	B	A	B	A	B	A	B	A	B	B	B	A
S3_15162018_B	3	15162018	48.049	B	A	A	-	A	A	A	B	A	A	B	B	B	B	A	B	B	B	B	-	B	A	A	B	B	B	B	B	B	B	A	A	A	A	B	A	B	A	B	A	B	A	B	B	A	-
S3_15162044_B	3	15162044	48.049	B	A	A	-	A	A	A	B	A	A	B	B	B	B	A	B	B	B	B	-	B	A	A	B	B	B	B	B	B	B	A	A	A	A	B	A	B	A	B	A	B	A	B	B	A	-
S3_15162048_B	3	15162048	48.049	B	A	A	-	A	A	A	B	A	A	B	B	B	B	A	B	B	B	B	-	B	A	A	B	B	B	B	B	B	B	A	A	A	A	B	A	B	A	B	A	B	A	B	B	A	-
S3_15162061_B	3	15162061	48.049	B	A	A	-	A	A	A	B	A	A	B	B	B	B	A	B	B	B	B	A	B	A	A	B	B	B	B	B	B	B	A	A	A	A	B	A	B	A	B	A	B	A	B	B	A	-
S3_15593148_B	3	15593148	49.595	B	A	A	A	A	A	A	B	A	A	B	B	B	B	A	B	B	B	A	A	B	A	A	B	B	B	B	B	B	B	A	A	A	A	B	A	B	A	B	A	B	A	B	B	-	-
S3_15611046_B	3	15611046	49.595	B	A	A	A	A	A	A	B	A	A	B	B	B	B	A	B	B	B	-	-	B	A	A	B	B	B	B	B	B	B	A	A	A	A	B	A	B	A	B	A	B	A	B	B	-	A
S3_15611130_B	3	15611130	49.595	B	A	A	-	A	A	A	B	A	A	B	B	B	B	A	B	B	B	A	-	B	A	A	B	B	B	B	B	B	B	A	A	A	A	B	A	B	A	B	A	B	A	B	B	A	-
S3_15611131_B	3	15611131	49.595	B	A	A	-	A	A	A	B	A	A	B	B	B	B	A	B	B	B	A	-	B	A	A	B	B	B	B	B	B	B	A	A	A	A	B	A	B	A	B	A	B	A	B	B	A	-
S3_15611145_B	3	15611145	49.595	B	A	A	-	A	A	A	B	A	A	B	B	B	B	A	B	B	B	A	-	B	A	A	B	B	B	B	B	B	B	A	A	A	A	B	A	B	A	B	A	B	A	B	B	A	-
S3_15614870_B	3	15614870	49.595	B	A	A	A	A	A	A	B	A	A	B	B	B	B	A	B	B	B	A	-	B	A	A	B	B	B	B	B	B	B	A	A	A	A	B	A	B	A	B	A	B	A	B	B	A	-
S3_15614876_B	3	15614876	49.595	B	A	A	A	A	A	A	B	A	A	B	B	B	B	A	B	B	B	A	-	B	A	A	B	B	B	B	B	B	B	A	A	A	A	B	A	B	A	B	A	B	A	B	B	A	-
S3_15625147_B	3	15625147	49.595	B	A	A	A	A	A	A	B	A	A	B	B	B	B	A	B	B	B	A	-	B	A	A	B	B	B	B	B	B	B	A	A	A	A	B	A	B	A	B	A	B	A	B	B	A	A
S3_15625148_B	3	15625148	49.595	B	A	A	A	A	A	A	B	A	A	B	B	B	B	A	B	B	B	A	-	B	A	A	B	B	B	B	B	B	B	A	A	A	A	B	A	B	A	B	A	B	A	B	B	A	A
S3_15680446_B	3	15680446	49.595	B	A	A	A	A	A	A	B	A	A	B	B	B	B	A	B	B	B	A	A	B	A	A	B	B	B	B	B	B	B	A	A	A	A	B	A	B	A	B	A	B	A	B	B	A	A
S3_15689043_B	3	15689043	49.595	B	A	A	A	A	A	A	B	A	A	B	B	B	B	A	B	B	B	A	B	B	A	A	B	B	B	B	B	B	B	A	A	A	A	B	A	B	A	B	A	B	A	B	B	A	A
S3_15768752_B	3	15768752	49.595	B	A	A	A	A	A	A	B	A	A	B	B	B	B	A	B	B	B	A	-	B	A	A	B	B	B	B	B	B	B	A	A	A	A	B	A	B	A	B	A	B	A	B	B	A	-
S3_15768753_B	3	15768753	49.595	B	A	A	A	A	A	A	B	A	A	B	B	B	B	A	B	B	B	A	-	B	A	A	B	B	B	B	B	B	B	A	A	A	A	B	A	B	A	B	A	B	A	B	B	A	-
S3_15768755_B	3	15768755	49.595	B	A	A	A	A	A	A	B	A	A	B	B	B	B	A	B	B	B	A	-	B	A	A	B	B	B	B	B	B	B	A	A	A	A	B	A	B	A	B	A	B	A	B	B	A	-
S3_15768756_B	3	15768756	49.595	B	A	A	A	A	A	A	B	A	A	B	B	B	B	A	B	B	B	A	-	B	A	A	B	B	B	B	B	B	B	A	A	A	A	B	A	B	A	B	A	B	A	B	B	A	-
S3_15782797_B	3	15782797	49.595	B	A	A	A	A	A	A	B	A	A	B	B	B	B	A	B	B	B	A	B	B	A	A	B	B	B	B	B	B	B	A	A	A	A	B	A	B	A	B	A	B	A	B	B	A	-
S3_15782804_B	3	15782804	49.595	B	A	A	A	A	A	A	B	A	A	B	B	B	B	A	B	B	B	A	B	B	A	A	B	B	B	B	B	B	B	A	A	A	A	B	A	B	A	B	A	B	A	B	B	A	-
S3_15783149_B	3	15783149	49.595	B	A	A	A	A	A	A	B	A	A	B	B	B	B	A	B	B	B	A	-	B	A	A	B	B	B	B	B	B	B	A	A	A	A	B	A	B	A	B	A	B	A	B	B	A	-
S3_15945840_B	3	15945840	50.627	B	A	A	B	A	A	A	B	A	A	B	B	B	B	A	B	B	B	A	B	B	A	A	B	-	B	B	B	B	B	A	A	A	A	B	A	B	A	B	A	B	A	B	B	A	-
S3_15945842_B	3	15945842	50.627	B	A	A	B	A	A	A	B	A	A	B	B	B	B	A	B	B	B	A	B	B	A	A	B	-	B	B	B	B	B	A	A	A	A	B	A	B	A	B	A	B	A	B	B	A	-
S3_15945865_B	3	15945865	50.627	B	A	A	B	A	A	A	B	A	A	B	B	B	B	A	B	B	B	A	B	B	A	A	B	-	B	B	B	B	B	A	A	A	A	B	A	B	A	B	A	B	A	B	B	A	-
S3_16234624_B	3	16234624	51.627	B	A	A	A	A	A	A	B	A	A	B	B	B	B	A	B	B	B	A	B	B	A	A	A	-	B	B	B	B	B	A	A	A	A	B	A	B	A	B	A	B	A	B	B	A	A
S3_50415663_B	3	50415663	52.627	B	A	A	A	A	A	A	B	A	A	B	B	B	B	A	B	B	B	A	B	B	A	A	A	A	B	B	B	B	B	A	A	A	A	B	A	B	A	B	A	B	A	A	B	A	-
S3_50672317_B	3	50672317	52.627	B	A	A	A	A	A	A	B	A	A	B	B	B	B	A	B	B	B	A	B	B	A	A	A	A	B	B	B	B	B	A	A	A	A	B	A	B	A	B	A	B	A	A	B	-	-
S3_50690630_B	3	50690630	52.627	B	A	A	A	A	A	A	B	A	A	B	-	B	B	A	B	B	B	A	B	B	A	A	A	A	B	B	B	B	B	A	A	A	A	B	A	B	A	B	A	B	A	A	-	-	A
S3_50804210_B	3	50804210	52.627	B	A	A	A	A	A	A	B	A	A	B	B	B	B	A	B	B	B	A	B	B	A	A	A	A	B	B	B	B	B	A	A	A	A	B	A	B	A	B	A	B	A	A	B	-	A
S3_50804686_B	3	50804686	52.627	B	A	A	A	A	A	A	B	A	A	B	B	B	B	A	B	B	B	A	B	B	A	A	A	A	B	B	B	B	B	A	A	A	A	B	A	B	A	B	A	B	A	A	B	-	A
S3_50882757_B	3	50882757	52.627	B	A	A	-	A	A	A	B	A	A	B	B	B	B	A	B	B	B	A	B	B	A	A	A	A	B	B	B	B	B	A	A	A	A	B	A	B	A	B	A	B	A	A	B	-	A
S3_50804411_B	3	50804411	53.137	B	A	A	-	A	A	A	B	A	A	B	B	B	B	A	B	B	B	A	B	B	A	-	A	A	B	B	B	B	B	A	A	A	A	B	A	B	A	B	A	B	A	A	B	-	-
S3_50877563_B	3	50877563	53.137	B	A	A	A	A	A	A	B	A	A	B	B	B	B	A	B	B	B	A	B	B	A	A	A	A	B	B	B	B	B	A	A	A	A	B	A	B	A	B	A	B	A	A	B	-	-
S3_50877571_B	3	50877571	53.137	B	A	A	A	A	A	A	B	A	A	B	B	B	B	A	B	B	B	A	B	B	A	A	A	A	B	B	B	B	B	A	A	A	A	B	A	B	A	B	A	B	A	A	B	-	-
S3_50993707_B	3	50993707	53.647	B	A	A	A	A	A	A	B	A	A	B	B	B	B	A	B	B	B	A	B	B	A	A	A	A	B	B	B	B	B	A	A	A	A	B	A	B	A	B	A	B	A	A	B	-	-
S3_50993732_B	3	50993732	53.647	B	A	A	A	A	A	A	B	A	A	B	B	B	B	A	B	B	B	A	B	B	A	A	A	A	B	B	B	B	B	A	A	A	A	B	A	B	A	B	A	B	A	A	B	-	-
S3_50993812_B	3	50993812	53.647	B	A	A	A	A	A	A	B	A	A	B	B	B	B	A	B	B	B	A	B	B	A	A	A	A	B	B	B	B	B	A	A	A	A	B	A	B	A	B	A	B	A	A	B	-	-
S3_50995046_B	3	50995046	53.647	B	A	A	A	A	A	A	B	A	A	B	B	B	B	A	B	B	B	A	B	B	A	A	A	A	B	B	B	B	B	A	A	A	A	B	A	B	A	B	A	B	A	A	B	-	-
S3_51032055_B	3	51032055	53.647	B	A	A	A	A	A	A	B	A	A	B	B	B	B	A	B	B	B	A	B	B	A	A	A	A	B	B	B	B	B	A	A	A	A	B	A	B	A	B	A	B	A	A	B	-	-
S3_52260812_B	3	52260812	55.732	B	A	A	A	A	A	A	B	A	A	B	B	B	B	A	B	B	B	A	A	B	A	A	A	A	B	B	B	B	B	A	A	A	A	B	A	B	A	B	A	B	A	A	B	A	B
S3_52260829_B	3	52260829	55.732	B	A	A	A	A	A	A	B	A	A	B	B	B	B	A	B	B	B	A	A	B	A	A	A	A	B	B	B	B	B	A	A	A	A	B	A	B	A	B	A	B	A	A	B	A	B
S3_52260830_B	3	52260830	55.732	B	A	A	A	A	A	A	B	A	A	B	B	B	B	A	B	B	B	A	A	B	A	A	A	A	B	B	B	B	B	A	A	A	A	B	A	B	A	B	A	B	A	A	B	A	B
S3_51997001_B	3	51997001	56.732	B	A	A	A	A	A	A	B	A	A	B	B	B	B	A	B	B	B	A	A	B	A	A	A	A	B	B	B	B	B	A	A	A	A	B	A	B	A	B	A	B	A	A	B	A	B
S3_52266201_B	3	52266201	56.732	B	A	A	-	A	A	A	B	A	A	B	B	B	B	A	B	B	B	A	A	B	A	A	A	A	B	B	B	B	B	A	A	A	A	B	A	B	A	-	A	B	A	A	B	A	B
S3_52266194_B	3	52266194	57.227	B	A	A	-	A	A	A	B	A	A	B	B	B	B	A	B	B	B	A	A	B	A	A	A	A	B	B	B	B	B	A	A	A	A	B	A	B	A	-	A	B	A	A	B	A	B
S3_53464882_B	3	53464882	57.227	B	A	A	-	A	A	A	B	A	A	B	B	B	B	A	B	B	B	A	A	B	A	A	A	-	B	B	B	B	B	A	A	A	A	B	A	B	A	-	A	B	A	A	B	A	B
S3_53476927_B	3	53476927	57.227	B	A	A	-	A	A	A	B	A	A	B	B	B	B	A	B	B	B	A	A	B	A	A	A	-	B	B	B	B	B	A	A	A	A	B	A	B	A	A	A	B	A	A	B	A	B
S3_53562015_B	3	53562015	57.227	B	A	A	-	A	A	A	B	A	A	B	B	B	B	A	B	B	B	A	A	B	A	A	A	A	B	B	B	B	B	A	A	A	A	B	A	B	A	-	A	B	A	A	B	A	B
S3_54967360_B	3	54967360	61.734	B	B	A	B	A	A	-	B	A	A	B	B	B	B	A	B	B	B	A	A	B	A	A	A	-	B	B	B	B	B	A	A	A	A	B	A	B	A	A	A	B	A	A	B	A	B
S3_55142236_B	3	55142236	61.734	B	B	A	B	A	A	-	B	A	A	B	B	B	B	A	B	B	B	-	A	B	A	A	A	-	B	B	B	B	B	A	A	A	A	B	A	B	A	-	A	B	A	A	B	A	B
S3_55142243_B	3	55142243	61.734	B	B	A	B	A	A	-	B	A	A	B	B	B	B	A	B	B	B	-	A	B	A	A	A	-	B	B	B	B	B	A	A	A	A	B	A	B	A	-	A	B	A	A	B	A	B
S3_55901140_B	3	55901140	64.424	A	B	A	B	A	A	B	B	A	A	A	B	B	B	A	B	B	B	A	A	B	A	A	A	-	B	B	B	B	B	A	B	A	A	B	A	B	A	B	A	B	A	A	B	A	B
S3_55901567_B	3	55901567	64.424	A	B	A	B	A	A	B	B	A	A	A	B	B	B	A	B	B	B	-	A	B	A	A	A	-	B	B	B	B	B	A	B	A	A	B	A	B	A	B	A	B	A	A	B	A	B
S3_55903290_B	3	55903290	64.424	A	B	A	B	A	A	-	B	A	A	A	B	B	B	A	B	B	B	-	A	B	A	A	A	-	B	B	B	B	B	A	B	A	A	B	A	B	A	-	A	B	A	A	B	A	B
S3_55903349_B	3	55903349	64.424	A	B	A	B	A	A	-	B	A	A	A	B	B	B	A	B	B	B	-	A	B	A	A	A	-	B	B	B	B	B	A	B	A	A	B	A	B	A	-	A	B	A	A	B	A	B
S3_55935644_B	3	55935644	64.424	A	B	A	B	A	A	-	B	A	A	A	B	B	B	A	B	B	B	B	A	B	A	A	A	-	B	B	B	B	B	A	B	A	A	B	A	B	A	B	A	B	A	A	B	A	B
S3_55901183_B	3	55901183	64.945	A	B	A	B	A	A	B	B	A	A	A	B	B	B	A	B	B	B	A	A	B	A	A	A	-	B	B	B	B	B	A	B	A	A	B	A	B	A	B	A	B	A	A	B	A	B
S3_56023056_B	3	56023056	65.987	A	B	A	B	A	A	-	B	A	A	A	B	B	B	A	B	B	B	B	A	B	B	A	A	-	B	B	B	B	B	A	B	A	A	B	A	B	A	-	A	B	A	A	B	A	-
S3_56023065_B	3	56023065	65.987	A	B	A	B	A	A	-	B	A	A	A	B	B	B	A	B	B	B	B	A	B	B	A	A	-	B	B	B	B	B	A	B	A	A	B	A	B	A	-	A	B	A	A	B	A	-
S3_56238840_B	3	56238840	68.139	A	B	A	B	A	A	-	B	A	A	A	B	B	B	B	B	B	B	A	A	B	B	A	A	-	B	B	B	B	B	A	B	A	A	B	A	B	A	A	A	B	A	A	B	A	B
S3_56243464_B	3	56243464	68.139	A	B	A	B	A	A	A	B	A	A	A	B	B	B	B	B	B	B	-	A	B	B	A	A	-	B	B	B	B	B	A	B	A	A	B	A	B	A	-	A	B	A	A	B	A	B
S3_56313754_B	3	56313754	68.139	A	B	A	B	A	A	-	B	A	A	A	B	B	B	B	B	B	B	-	A	B	B	A	A	-	B	B	B	B	B	A	B	A	A	B	A	B	A	A	A	B	-	A	B	A	B
S3_56614292_B	3	56614292	69.686	A	B	A	B	A	A	B	B	A	A	A	B	B	B	B	B	B	B	-	A	B	B	A	A	-	B	B	B	B	B	A	B	A	A	B	A	B	A	-	A	B	-	A	B	A	B
S3_56614293_B	3	56614293	69.686	A	B	A	B	A	A	B	B	A	A	A	B	B	B	B	B	B	B	-	A	B	B	A	A	-	B	B	B	B	B	A	B	A	A	B	A	B	A	-	A	B	-	A	B	A	B
S3_56647990_B	3	56647990	69.686	A	B	A	B	A	A	B	B	A	A	A	B	B	B	B	B	B	B	-	A	B	B	A	A	-	B	B	B	B	B	A	B	A	A	B	A	B	A	-	A	B	-	A	B	A	B
S3_56656490_B	3	56656490	69.686	A	B	A	B	A	A	B	B	A	A	A	B	B	B	B	B	B	B	-	A	B	B	A	A	A	B	B	B	B	B	A	B	A	A	B	A	B	A	-	A	B	-	A	B	A	B
S3_55888950_B	3	55888950	71.299	A	B	A	B	A	A	-	B	A	A	A	B	B	B	A	B	B	B	-	A	B	A	A	A	-	B	B	B	B	B	A	B	A	A	B	A	B	A	-	A	B	A	A	B	A	B
S3_55901815_B	3	55901815	71.299	A	B	A	B	A	A	-	B	A	A	A	B	B	B	A	B	B	B	A	A	B	-	A	A	-	B	B	B	B	B	-	B	A	A	B	A	B	A	A	A	B	A	A	B	A	B
S3_56003507_B	3	56003507	71.299	A	B	A	B	A	A	B	B	A	A	A	B	B	B	A	B	B	B	-	A	B	B	A	A	-	B	B	B	B	B	A	B	A	A	B	A	B	A	-	A	B	A	A	B	A	B
S3_57189090_B	3	57189090	77.885	A	B	A	B	A	A	-	B	A	A	A	B	-	B	A	A	B	B	-	A	B	B	A	A	-	B	A	B	A	B	B	B	A	A	B	A	B	A	-	A	B	B	A	A	A	B
S3_57215991_B	3	57215991	77.885	A	B	A	B	A	A	-	B	A	A	A	B	A	B	A	A	B	B	-	A	B	B	A	A	B	B	A	B	A	B	B	B	A	A	B	A	B	A	-	A	B	B	A	A	A	B
S3_57215994_B	3	57215994	77.885	A	B	A	B	A	A	-	B	A	A	A	B	A	B	A	A	B	B	-	A	B	B	A	A	B	B	A	B	A	B	B	B	A	A	B	A	B	A	-	A	B	B	A	A	A	B
S3_57215999_B	3	57215999	77.885	A	B	A	B	A	A	-	B	A	A	A	B	A	B	A	A	B	B	-	A	B	B	A	A	B	B	A	B	A	B	B	B	A	A	B	A	B	A	-	A	B	B	A	A	A	B
S3_57759697	3	57759697	81.696	A	B	A	B	A	-	-	B	A	A	A	B	-	B	A	A	B	B	-	A	B	A	A	A	B	B	B	A	A	B	A	B	A	A	B	A	A	A	-	A	B	B	A	A	A	B
S3_57759730	3	57759730	81.696	A	B	A	B	A	-	-	B	A	A	A	B	-	B	A	A	B	B	-	A	B	A	A	A	B	B	B	A	A	B	A	B	A	A	B	A	A	A	-	A	B	B	A	A	A	B
S3_57857606	3	57857606	81.696	A	B	A	B	A	-	-	B	A	A	A	B	A	B	A	A	B	B	B	A	B	A	A	A	B	B	-	A	A	B	A	B	A	A	B	A	A	A	A	A	B	B	A	A	A	B
S3_58846929	3	58846929	88.203	A	B	A	B	A	A	-	B	A	A	A	B	B	B	A	A	B	B	B	A	B	A	A	B	B	B	-	A	A	B	A	B	-	A	B	A	A	A	-	A	B	B	A	A	A	B
S3_58846958	3	58846958	88.203	A	B	A	B	A	A	A	B	A	A	A	B	B	B	A	A	B	B	B	A	B	A	A	B	B	B	-	A	A	B	A	B	B	A	B	A	A	A	-	A	B	B	A	A	A	B
S3_58846980	3	58846980	88.203	A	B	A	B	A	A	A	B	A	A	A	B	B	B	A	A	B	B	B	A	B	A	A	B	B	B	-	A	A	B	A	B	B	A	B	A	A	A	-	A	B	B	A	A	A	B
S3_59195065	3	59195065	88.203	A	B	A	B	A	A	A	B	A	A	A	B	B	B	A	A	B	B	-	A	B	A	A	B	B	B	-	A	A	B	A	B	B	A	B	A	A	A	-	A	B	B	A	A	A	B
S3_58878048	3	58878048	89.256	A	B	A	B	A	A	-	B	A	A	A	B	B	B	A	A	B	B	-	A	B	A	A	B	B	B	-	A	A	B	A	B	B	A	B	A	A	A	B	A	B	B	A	A	A	B
S3_58901018	3	58901018	89.256	A	B	A	B	A	A	A	B	A	A	A	B	-	B	A	A	B	B	-	-	B	A	A	B	B	B	A	A	A	B	A	B	B	A	B	A	A	A	-	A	B	B	A	A	A	B
S3_58901020	3	58901020	89.256	A	B	A	B	A	A	A	B	A	A	A	B	-	B	A	A	B	B	-	-	B	A	A	B	B	B	A	A	A	B	A	B	B	A	B	A	A	A	-	A	B	B	A	A	A	B
S3_60182556_B	3	60182556	91.455	A	B	A	B	A	-	-	B	A	A	B	B	-	B	A	A	B	B	A	A	B	A	A	B	B	B	B	A	A	B	A	B	B	A	A	A	A	A	B	A	B	B	A	A	A	A
S3_60182578	3	60182578	91.455	A	B	A	B	A	-	-	B	A	A	B	B	-	B	A	A	B	B	A	A	B	A	A	B	B	B	B	A	A	B	A	B	B	A	A	A	A	A	B	A	B	B	A	A	A	A
S3_60182591	3	60182591	91.455	A	B	A	B	A	-	-	B	A	A	B	B	-	B	A	A	B	B	A	A	B	A	A	B	B	B	B	A	A	B	A	B	B	A	A	A	A	A	B	A	B	B	A	A	A	A
S3_60421934	3	60421934	91.982	A	B	A	B	A	A	-	B	A	A	B	B	B	B	A	A	B	B	A	A	B	A	A	B	B	B	A	A	A	B	A	B	B	A	A	A	A	A	B	A	B	B	A	A	A	A
S3_60421975	3	60421975	91.982	A	B	A	B	A	A	-	B	A	A	B	B	B	B	A	A	B	B	A	A	B	A	A	B	B	B	A	A	A	B	A	B	B	A	A	A	A	A	B	A	B	B	A	A	A	A
S3_60421976	3	60421976	91.982	A	B	A	B	A	A	-	B	A	A	B	B	B	B	A	A	B	B	A	A	B	A	A	B	B	B	A	A	A	B	A	B	B	A	A	A	A	A	B	A	B	B	A	A	A	A
S3_60431875_B	3	60431875	91.982	A	B	A	B	A	-	B	B	A	A	B	B	B	B	A	A	B	B	-	A	B	A	A	B	B	B	-	A	A	B	A	B	B	A	A	A	A	A	B	A	B	B	A	A	A	A
S3_60435495	3	60435495	92.503	A	B	A	B	A	-	A	B	A	A	B	B	B	B	A	A	B	B	A	A	B	A	A	B	B	B	B	A	A	B	A	B	B	A	A	A	A	A	-	A	B	B	A	A	A	A
S3_60438013_B	3	60438013	92.503	A	B	A	B	A	-	-	B	A	A	B	B	B	B	A	A	B	B	-	A	B	A	A	B	B	B	-	A	A	B	A	B	B	A	A	A	A	A	-	A	B	B	-	A	A	A
S3_60438161_B	3	60438161	93.013	A	B	A	B	A	-	A	B	A	A	B	B	B	B	A	A	B	B	B	A	B	A	A	B	B	B	B	A	A	B	A	B	B	A	A	A	A	A	-	A	B	B	A	A	A	A
S3_60473044_B	3	60473044	93.013	A	B	A	B	A	-	-	B	A	A	B	B	B	B	A	A	B	B	-	A	B	A	A	B	B	B	-	A	A	B	A	B	B	A	A	A	A	A	-	A	B	B	A	A	A	A
S3_60473057_B	3	60473057	93.013	A	B	A	B	A	-	-	B	A	A	B	B	B	B	A	A	B	B	-	A	B	A	A	B	B	B	-	A	A	B	A	B	B	A	A	A	A	A	-	A	B	B	A	A	A	A
S3_60473058_B	3	60473058	93.013	A	B	A	B	A	-	-	B	A	A	B	B	B	B	A	A	B	B	-	A	B	A	A	B	B	B	-	A	A	B	A	B	B	A	A	A	A	A	-	A	B	B	A	A	A	A
S3_60492752	3	60492752	93.013	A	B	A	B	A	-	-	B	A	A	B	B	-	B	A	A	B	B	-	A	B	A	A	B	B	B	-	A	A	B	A	B	B	A	A	A	A	A	-	A	B	B	A	A	A	A
S3_60492765	3	60492765	93.013	A	B	A	B	A	-	-	B	A	A	B	B	-	B	A	A	B	B	-	A	B	A	A	B	B	B	-	A	A	B	A	B	B	A	A	A	A	A	-	A	B	B	A	A	A	A
S3_60570775	3	60570775	94.044	A	B	A	B	A	-	A	B	A	A	B	B	-	B	B	A	B	B	A	A	B	A	A	B	B	B	-	A	A	B	A	B	B	A	A	A	A	A	-	A	B	B	A	A	A	A
S3_60582529	3	60582529	94.044	A	B	A	B	A	-	A	B	A	A	B	B	-	B	B	A	B	B	-	A	B	A	A	B	B	B	-	A	A	B	A	B	B	A	A	A	A	A	A	A	B	B	A	A	A	A
S3_60582577	3	60582577	94.044	A	B	A	B	A	-	A	B	A	A	B	B	-	B	B	A	B	B	-	A	B	A	A	B	B	B	-	A	A	B	A	B	B	A	A	A	A	A	A	A	B	B	A	A	A	A
S3_60599056	3	60599056	94.044	A	B	A	B	A	A	A	B	A	A	B	B	-	B	B	A	B	B	-	A	B	A	A	B	B	B	B	A	A	B	A	B	B	A	A	A	A	A	A	A	B	B	A	A	A	A
S3_60601189	3	60601189	94.044	A	B	A	B	A	A	A	B	A	A	B	B	-	B	B	A	B	B	-	A	B	A	A	B	B	B	B	A	A	B	A	B	B	A	A	A	A	A	A	A	B	B	A	A	A	A
S3_62320176_B	3	62320176	100.985	B	B	A	B	A	-	A	B	A	A	B	B	B	B	B	A	B	B	A	A	A	A	B	B	B	B	B	A	A	B	A	B	B	A	A	A	A	B	B	-	B	B	A	A	B	A
S3_62394068_B	3	62394068	100.985	B	B	A	B	A	B	A	B	A	A	B	B	B	B	B	A	B	B	A	A	A	A	-	B	B	B	-	A	A	B	A	B	-	A	A	A	A	B	-	-	B	B	A	A	B	A
S3_62394076_B	3	62394076	100.985	B	B	A	B	A	B	A	B	A	A	B	B	B	B	B	A	B	B	A	A	A	A	-	B	B	B	-	A	A	B	A	B	-	A	A	A	A	B	-	-	B	B	A	A	B	A
S3_62320220	3	62320220	101.495	B	B	A	B	A	-	A	B	A	A	B	B	B	B	B	A	B	B	A	A	A	A	B	B	B	B	-	A	A	B	A	B	-	A	A	A	A	B	-	-	B	B	A	A	B	A
S3_62383617	3	62383617	101.495	B	B	A	B	A	A	A	B	A	A	B	B	-	B	B	A	B	B	A	A	A	A	B	B	B	B	A	A	A	B	A	B	-	A	A	A	A	B	-	B	B	B	A	A	B	A
S3_62383619	3	62383619	101.495	B	B	A	B	A	A	A	B	A	A	B	B	-	B	B	A	B	B	A	A	A	A	B	B	B	B	A	A	A	B	A	B	-	A	A	A	A	B	-	B	B	B	A	A	B	A
S3_62407421	3	62407421	101.495	-	B	A	B	A	-	A	B	A	A	B	B	-	B	B	A	B	B	A	A	A	A	B	B	B	B	A	A	A	B	A	B	-	A	A	A	A	B	-	-	B	B	A	A	B	A
S3_62355689	3	62355689	102.016	B	B	A	B	A	-	A	B	A	A	B	B	A	B	B	A	B	B	A	A	A	A	-	B	B	B	-	A	A	B	A	B	A	A	A	A	A	B	-	-	B	B	A	A	B	A
S3_62383700	3	62383700	102.016	-	B	A	B	A	-	A	B	A	A	B	B	-	B	B	A	B	B	A	A	A	A	-	B	B	B	B	A	A	B	A	B	-	A	A	A	A	B	-	-	B	B	A	A	B	A
S3_62418055	3	62418055	102.016	B	B	A	B	A	-	A	B	A	A	B	B	-	B	B	A	B	B	A	A	A	A	A	B	B	B	-	A	A	B	A	B	A	A	A	A	A	B	-	-	B	B	A	A	B	A
S3_62427677	3	62427677	102.016	B	B	A	B	A	-	A	B	A	A	B	B	B	B	B	A	B	B	A	A	A	A	-	B	B	B	B	A	A	B	A	B	-	A	A	A	A	B	-	B	B	B	A	A	B	A
S3_62447246	3	62447246	102.016	-	B	A	B	A	-	A	B	A	A	B	B	B	B	B	A	B	B	A	A	A	A	A	B	B	B	B	A	A	B	A	B	-	A	A	A	-	B	B	A	B	B	A	A	B	A
S3_63572821	3	63572821	106.001	A	B	A	B	A	-	B	B	A	A	B	B	-	B	B	A	B	B	A	A	A	A	A	B	B	B	-	A	A	B	A	B	-	A	A	A	B	B	A	-	B	B	A	A	B	A
S3_63575887	3	63575887	106.001	A	B	A	B	A	B	-	B	A	A	B	B	B	B	B	A	B	B	A	A	A	A	A	B	B	B	B	A	A	B	A	B	B	A	A	A	B	B	A	-	B	B	A	A	B	A
S3_63575888	3	63575888	106.001	A	B	A	B	A	B	-	B	A	A	B	B	B	B	B	A	B	B	A	A	A	A	A	B	B	B	B	A	A	B	A	B	B	A	A	A	B	B	A	-	B	B	A	A	B	A
S3_64221052	3	64221052	107.598	A	B	A	B	A	-	B	B	A	A	B	B	-	B	B	A	B	B	A	A	A	A	-	B	B	B	B	A	A	B	A	B	-	A	A	A	B	B	A	B	B	B	A	A	B	A
S3_64317660	3	64317660	107.598	A	B	A	B	A	B	B	B	A	A	B	B	B	B	B	A	B	B	A	A	A	-	-	B	B	B	B	A	A	B	A	B	B	A	A	A	B	B	A	-	B	B	A	A	B	A
S3_64373989	3	64373989	107.598	A	B	A	B	A	-	B	B	A	A	B	B	A	B	B	A	B	B	A	A	A	A	B	B	B	B	B	A	A	B	A	B	A	A	A	A	B	B	A	-	B	B	A	A	B	A
S3_64532576	3	64532576	107.598	A	B	A	B	A	A	B	B	A	A	B	B	-	B	B	A	B	B	A	A	A	A	B	B	B	B	B	A	A	B	A	B	-	A	A	A	B	B	A	-	B	B	A	A	B	A
S3_65257498	3	65257498	110.26	A	B	A	B	A	-	B	B	A	A	B	-	B	B	B	A	B	B	A	A	A	A	-	B	B	B	-	A	A	B	A	B	A	A	A	A	B	B	A	-	B	B	A	A	B	A
S3_65348747	3	65348747	110.26	A	B	A	B	A	-	B	B	A	A	B	-	-	B	B	A	B	B	A	A	A	A	-	B	B	B	A	A	A	B	A	B	-	A	A	A	B	B	A	A	B	B	A	A	B	A
S3_65348748	3	65348748	110.26	A	B	A	B	A	-	B	B	A	A	B	-	-	B	B	A	B	B	A	A	A	A	-	B	B	B	A	A	A	B	A	B	-	A	A	A	B	B	A	A	B	B	A	A	B	A
S3_65348752	3	65348752	110.26	A	B	A	B	A	-	B	B	A	A	B	-	-	B	B	A	B	B	A	A	A	A	-	B	B	B	A	A	A	B	A	B	-	A	A	A	B	B	A	A	B	B	A	A	B	A
S3_65364577	3	65364577	110.26	A	B	A	B	A	-	-	B	A	A	B	B	A	B	B	A	B	B	A	A	A	A	B	B	B	B	-	A	A	B	A	B	-	A	A	A	B	B	A	-	B	B	A	A	B	A
S3_65364682	3	65364682	110.26	A	B	A	B	A	-	-	B	A	A	B	B	A	B	B	A	B	B	A	A	A	A	B	B	B	B	-	A	A	B	A	B	A	A	A	A	B	B	A	-	B	B	A	A	B	A
S3_65858654	3	65858654	112.412	A	B	A	B	A	A	B	B	A	A	B	-	-	B	B	A	B	B	A	A	A	A	-	B	B	B	B	A	A	B	A	B	-	A	A	A	B	B	A	-	B	B	A	B	B	A
S3_65718956	3	65718956	112.933	A	B	A	B	A	A	-	B	A	A	B	-	-	B	B	A	B	B	A	A	A	A	-	B	B	B	B	A	A	B	A	B	-	A	A	A	B	B	A	-	B	B	A	B	B	A
S3_65718957	3	65718957	112.933	A	B	A	B	A	A	-	B	A	A	B	-	-	B	B	A	B	B	A	A	A	A	-	B	B	B	B	A	A	B	A	B	-	A	A	A	B	B	A	-	B	B	A	B	B	A
S3_65718958	3	65718958	112.933	A	B	A	B	A	A	-	B	A	A	B	-	-	B	B	A	B	B	A	A	A	A	-	B	B	B	B	A	A	B	A	B	-	A	A	A	B	B	A	-	B	B	A	B	B	A
S3_66180230	3	66180230	112.933	A	B	A	B	A	A	-	B	A	A	B	A	A	B	B	A	B	B	-	A	A	A	B	B	B	B	B	A	A	B	A	B	B	A	A	A	B	B	A	-	B	B	A	B	B	A
S3_65553481	3	65553481	113.974	A	B	A	B	A	A	-	B	A	A	B	-	B	B	B	A	B	B	A	A	A	A	-	B	B	B	B	A	A	B	A	B	-	A	A	A	B	B	A	-	B	B	A	B	B	A
S3_65553483	3	65553483	113.974	A	B	A	B	A	A	-	B	A	A	B	-	B	B	B	A	B	B	A	A	A	A	-	B	B	B	B	A	A	B	A	B	-	A	A	A	B	B	A	-	B	B	A	B	B	A
S3_65553484	3	65553484	113.974	A	B	A	B	A	A	-	B	A	A	B	-	B	B	B	A	B	B	A	A	A	A	-	B	B	B	B	A	A	B	A	B	-	A	A	A	B	B	A	-	B	B	A	B	B	A
S3_65553486	3	65553486	113.974	A	B	A	B	A	A	-	B	A	A	B	-	B	B	B	A	B	B	A	A	A	A	-	B	B	B	B	A	A	B	A	B	-	A	A	A	B	B	A	-	B	B	A	B	B	A
S3_65682610	3	65682610	113.974	A	B	A	B	A	A	-	B	A	A	B	B	B	B	B	A	B	B	A	A	A	A	B	B	B	B	B	A	A	B	A	B	A	A	A	A	B	B	A	-	B	B	A	B	B	A
S3_66147852	3	66147852	113.974	A	B	A	B	A	A	A	B	A	A	B	-	-	B	B	A	B	B	-	A	A	A	-	B	B	B	B	A	A	B	A	B	A	A	A	A	B	B	A	-	B	B	A	B	B	A
S3_66862066	3	66862066	116.755	A	B	A	B	A	-	-	B	A	A	B	B	B	B	B	A	B	B	-	A	A	A	-	B	B	B	B	A	A	B	A	B	B	A	A	A	B	B	A	-	B	B	A	B	B	A
S3_66863720	3	66863720	116.755	A	B	A	B	A	A	B	B	A	A	B	B	B	B	B	A	B	B	-	A	A	A	A	B	B	B	B	A	A	B	A	B	-	A	A	A	B	B	A	A	B	B	A	B	B	A
S3_66863730	3	66863730	116.755	A	B	A	B	A	A	B	B	A	A	B	B	B	B	B	A	B	B	-	A	A	A	A	B	B	B	B	A	A	B	A	B	-	A	A	A	B	B	A	A	B	B	A	B	B	A
S3_66863774	3	66863774	116.755	A	B	A	B	A	A	B	B	A	A	B	B	B	B	B	A	B	B	-	A	A	A	A	B	B	B	B	A	A	B	A	B	-	A	A	A	B	B	A	A	B	B	A	B	B	A
S3_66887007	3	66887007	116.755	A	B	A	B	A	-	B	B	A	A	B	B	B	B	B	A	B	B	-	A	A	A	-	B	B	B	B	A	A	B	A	B	-	A	A	A	B	B	A	-	B	B	A	B	B	A
S3_69102362	3	69102362	122.528	A	B	A	B	A	A	-	B	A	A	B	A	A	B	B	A	B	B	-	A	A	A	B	A	B	B	B	A	A	B	B	B	-	A	A	A	B	B	A	A	B	B	A	B	B	A
S3_69102378	3	69102378	122.528	A	B	A	B	A	A	-	B	A	A	B	A	A	B	B	A	B	B	-	A	A	A	B	A	B	B	B	A	A	B	B	B	-	A	A	A	B	B	A	A	B	B	A	B	B	A
S3_69136255	3	69136255	122.528	A	B	A	B	A	A	B	B	A	A	B	A	-	B	B	A	B	B	A	A	A	A	-	A	B	B	B	A	A	B	B	B	-	A	A	A	B	B	A	-	B	B	A	B	B	A
S3_69851791	3	69851791	124.159	A	B	A	B	-	A	-	B	A	B	B	A	B	B	B	A	B	B	A	A	A	A	A	A	B	B	B	A	A	B	B	B	B	B	A	A	B	B	A	-	B	B	A	B	B	A
S3_69885956	3	69885956	124.159	A	B	A	B	A	A	A	B	-	B	B	A	B	B	B	-	B	B	-	-	A	A	A	A	B	B	B	A	A	B	B	B	B	B	A	A	B	B	A	-	B	B	A	B	B	A
S3_69963970	3	69963970	124.159	A	B	A	B	A	A	-	B	-	B	B	A	B	B	B	A	B	B	A	-	A	A	A	A	B	B	B	A	A	B	B	B	B	B	A	A	B	B	A	-	B	B	A	B	B	A
S3_69680582	3	69680582	124.669	A	B	A	B	A	A	A	B	A	B	B	A	B	B	B	A	B	B	B	A	A	A	-	A	B	B	B	A	A	B	B	B	B	B	A	A	B	B	A	B	B	B	A	B	B	A
S3_69680583	3	69680583	124.669	A	B	A	B	A	A	A	B	A	B	B	A	B	B	B	A	B	B	B	A	A	A	-	A	B	B	B	A	A	B	B	B	B	B	A	A	B	B	A	B	B	B	A	B	B	A
S3_69680584	3	69680584	124.669	A	B	A	B	A	A	A	B	A	B	B	A	B	B	B	A	B	B	B	A	A	A	-	A	B	B	B	A	A	B	B	B	B	B	A	A	B	B	A	B	B	B	A	B	B	A
S3_69680585	3	69680585	124.669	A	B	A	B	A	A	A	B	A	B	B	A	B	B	B	A	B	B	B	A	A	A	-	A	B	B	B	A	A	B	B	B	B	B	A	A	B	B	A	B	B	B	A	B	B	A
S3_69969417	3	69969417	126.775	A	B	A	B	A	-	B	B	A	B	B	A	B	B	B	-	B	B	A	-	A	A	A	A	B	B	B	A	A	B	B	B	B	B	A	A	B	B	A	-	B	B	A	B	B	A
S3_69969418	3	69969418	126.775	A	B	A	B	A	-	B	B	A	B	B	A	B	B	B	-	B	B	A	-	A	A	A	A	B	B	B	A	A	B	B	B	B	B	A	A	B	B	A	-	B	B	A	B	B	A
S3_69969419	3	69969419	126.775	A	B	A	B	A	-	B	B	A	B	B	A	B	B	B	-	B	B	A	-	A	A	A	A	B	B	B	A	A	B	B	B	B	B	A	A	B	B	A	-	B	B	A	B	B	A
S3_71061685	3	71061685	130.151	A	B	B	B	A	B	B	B	-	B	B	A	B	B	B	A	-	B	-	-	A	A	A	A	B	B	B	A	A	B	B	A	B	B	A	A	B	B	A	-	B	B	A	B	B	A
S3_71296961_B	3	71296961	130.151	A	B	B	B	A	B	B	B	A	B	B	A	B	B	B	-	B	B	A	B	A	A	A	A	B	B	B	A	A	B	B	A	B	B	A	A	B	B	A	-	B	B	A	B	B	A
S3_71296962_B	3	71296962	130.151	A	B	B	B	A	B	B	B	A	B	B	A	B	B	B	-	B	B	A	B	A	A	A	A	B	B	B	A	A	B	B	A	B	B	A	A	B	B	A	-	B	B	A	B	B	A
S3_71296963_B	3	71296963	130.151	A	B	B	B	A	B	B	B	A	B	B	A	B	B	B	-	B	B	A	B	A	A	A	A	B	B	B	A	A	B	B	A	B	B	A	A	B	B	A	-	B	B	A	B	B	A
S3_71296964_B	3	71296964	130.151	A	B	B	B	A	B	B	B	A	B	B	A	B	B	B	-	B	B	A	B	A	A	A	A	B	B	B	A	A	B	B	A	B	B	A	A	B	B	A	-	B	B	A	B	B	A
S3_71698449_B	3	71698449	133.566	A	B	B	-	A	B	B	B	B	B	B	A	A	A	B	A	B	B	B	A	A	A	B	A	B	B	B	A	A	B	B	A	B	B	A	A	B	B	A	A	B	B	B	B	B	A
S3_71698458_B	3	71698458	133.566	A	B	B	-	A	B	B	B	B	B	B	A	A	A	B	A	B	B	B	A	A	A	B	A	B	B	B	A	A	B	B	A	B	B	A	A	B	B	A	A	B	B	B	B	B	A
S3_71698461	3	71698461	133.566	A	B	B	-	A	B	B	B	B	B	B	A	A	A	B	A	B	B	B	A	A	A	B	A	B	B	B	A	A	B	B	A	B	B	A	A	B	B	A	A	B	B	B	B	B	A
S3_72308279	3	72308279	137.551	A	B	B	-	A	B	B	B	B	B	B	A	-	-	B	-	B	B	B	A	B	A	A	A	B	B	B	A	A	B	A	A	B	B	A	A	A	B	A	-	B	B	B	B	B	A
S3_72322424	3	72322424	137.551	A	B	B	B	A	B	B	B	B	B	B	A	-	A	B	B	B	B	B	A	B	A	A	A	B	B	B	A	A	B	A	A	B	B	A	A	A	B	A	B	B	B	B	B	B	A
S3_72322426	3	72322426	137.551	A	B	B	B	A	B	B	B	B	B	B	A	-	A	B	B	B	B	B	A	B	A	A	A	B	B	B	A	A	B	A	A	B	B	A	A	A	B	A	B	B	B	B	B	B	A
S3_72337404	3	72337404	137.551	A	B	B	A	A	B	B	B	B	B	B	A	-	-	B	-	B	B	B	A	B	A	A	A	B	B	B	A	A	B	A	A	B	B	A	A	A	B	A	A	B	B	B	B	B	A
S3_72414662	3	72414662	139.68	A	B	B	A	A	B	B	B	B	B	B	A	B	-	B	-	B	B	B	A	B	A	A	A	B	B	B	A	A	B	A	A	B	B	A	A	A	B	A	-	B	B	B	B	B	A
S3_72414665	3	72414665	139.68	A	B	B	A	A	B	B	B	B	B	B	A	B	-	B	-	B	B	B	A	B	A	A	A	B	B	B	A	A	B	A	A	B	B	A	A	A	B	A	-	B	B	B	B	B	A
S3_72414667	3	72414667	139.68	A	B	B	A	A	B	B	B	B	B	B	A	B	-	B	-	B	B	B	A	B	A	A	A	B	B	B	A	A	B	A	A	B	B	A	A	A	B	A	-	B	B	B	B	B	A
S3_72414673	3	72414673	139.68	A	B	B	A	A	B	B	B	B	B	B	A	B	-	B	-	B	B	B	A	B	A	A	A	B	B	B	A	A	B	A	A	B	B	A	A	A	B	A	-	B	B	B	B	B	A
S3_73319666_B	3	73319666	146.703	A	B	B	-	A	B	B	B	B	B	B	A	B	B	B	-	B	B	-	A	B	B	A	A	A	A	B	A	A	B	A	A	B	B	A	A	A	A	A	-	B	B	B	B	B	A
S3_73322045_B	3	73322045	146.703	A	B	B	-	A	B	B	B	B	B	B	B	-	B	B	-	B	B	-	A	B	B	A	A	A	A	B	A	A	B	A	A	B	B	A	A	A	A	A	-	B	B	B	B	B	A
S3_73337352_B	3	73337352	146.703	A	B	B	B	A	B	B	B	B	B	B	-	B	B	B	A	B	B	A	A	B	B	A	A	A	A	B	A	A	B	A	A	B	B	A	A	A	A	A	-	B	B	B	B	B	A
S3_73362984_B	3	73362984	146.703	A	B	B	B	A	B	B	B	B	B	B	-	B	B	B	-	B	B	A	A	B	B	A	A	A	A	B	A	A	B	A	A	B	B	A	A	A	A	A	A	B	B	B	B	B	A
S3_73362166_B	3	73362166	147.235	A	B	B	-	A	B	B	B	B	B	B	B	-	B	B	-	B	B	-	A	B	B	A	A	A	A	B	A	A	B	A	A	B	B	A	A	A	A	A	B	B	B	B	B	B	A
S3_73362182_B	3	73362182	147.235	A	B	B	-	A	B	B	B	B	B	B	B	-	B	B	-	B	B	-	A	B	B	A	A	A	A	B	A	A	B	A	A	B	B	A	A	A	A	A	B	B	B	B	B	B	A
S3_73437274_B	3	73437274	147.235	A	B	B	B	A	B	B	B	B	B	B	B	A	B	B	B	B	B	A	A	B	B	A	A	A	A	B	A	A	B	A	A	B	B	A	A	A	A	A	B	B	B	B	B	B	A
S3_73437279_B	3	73437279	147.235	A	B	B	B	A	B	B	B	B	B	B	B	A	B	B	B	B	B	A	A	B	B	A	A	A	A	B	A	A	B	A	A	B	B	A	A	A	A	A	B	B	B	B	B	B	A
S3_73437286_B	3	73437286	147.235	A	B	B	B	A	B	B	B	B	B	B	B	A	B	B	B	B	B	A	A	B	B	A	A	A	A	B	A	A	B	A	A	B	B	A	A	A	A	A	B	B	B	B	B	B	A
S4_1340810_B	4	1340810	0	-	A	B	B	B	B	A	B	A	B	B	B	B	B	B	B	B	B	A	A	A	A	B	A	A	A	B	-	A	B	A	A	B	A	B	B	A	B	A	A	B	A	B	B	B	A
S4_1340823_B	4	1340823	0	-	A	B	B	B	B	A	B	A	B	B	B	B	B	B	B	B	B	A	A	A	A	B	A	A	A	B	-	A	B	A	A	B	A	B	B	A	B	A	A	B	A	B	B	B	A
S4_1340824_B	4	1340824	0	-	A	B	B	B	B	A	B	A	B	B	B	B	B	B	B	B	B	A	A	A	A	B	A	A	A	B	-	A	B	A	A	B	A	B	B	A	B	A	A	B	A	B	B	B	A
S4_1340825_B	4	1340825	0	-	A	B	B	B	B	A	B	A	B	B	B	B	B	B	B	B	B	A	A	A	A	B	A	A	A	B	-	A	B	A	A	B	A	B	B	A	B	A	A	B	A	B	B	B	A
S4_1350729_B	4	1350729	0	A	A	B	B	B	B	A	B	A	B	B	B	B	B	B	B	B	B	A	A	A	A	B	A	A	A	B	B	A	B	A	A	B	A	B	B	A	B	A	A	B	A	B	B	B	A
S4_1365643_B	4	1365643	0	-	A	B	B	B	B	A	B	A	B	B	B	B	B	B	B	B	B	A	A	A	A	B	A	A	A	B	A	A	B	A	A	B	A	B	B	A	B	A	A	B	A	B	B	B	A
S4_1373017_B	4	1373017	1	A	A	B	B	B	B	A	B	A	B	B	B	B	B	B	B	B	B	A	A	A	A	B	A	A	A	B	B	A	B	A	A	B	A	B	B	A	B	A	A	B	A	B	B	B	A
S4_1373018_B	4	1373018	1	A	A	B	B	B	B	A	B	A	B	B	B	B	B	B	B	B	B	A	A	A	A	B	A	A	A	B	B	A	B	A	A	B	A	B	B	A	B	A	A	B	A	B	B	B	A
S4_1373019_B	4	1373019	1	A	A	B	B	B	B	A	B	A	B	B	B	B	B	B	B	B	B	A	A	A	A	B	A	A	A	B	B	A	B	A	A	B	A	B	B	A	B	A	A	B	A	B	B	B	A
S4_1373020_B	4	1373020	1	A	A	B	B	B	B	A	B	A	B	B	B	B	B	B	B	B	B	A	A	A	A	B	A	A	A	B	B	A	B	A	A	B	A	B	B	A	B	A	A	B	A	B	B	B	A
S4_1373052_B	4	1373052	1	A	A	B	B	B	B	A	B	A	B	B	B	B	B	B	B	B	B	A	A	A	A	B	A	A	A	B	B	A	B	A	A	B	A	B	B	A	B	A	A	B	A	B	B	B	A
S4_1198822_B	4	1198822	2	A	A	B	B	B	B	A	B	A	B	B	B	B	B	B	B	B	B	A	A	A	A	B	A	A	A	B	-	A	B	A	A	B	A	B	B	A	B	A	A	B	A	B	B	B	A
S4_1359943_B	4	1359943	2	A	A	B	B	B	B	A	B	A	B	B	B	B	B	B	B	B	B	A	A	A	A	B	A	A	A	B	B	A	B	A	A	B	A	B	B	A	B	A	A	B	A	B	B	B	A
S4_1371957_B	4	1371957	2	-	A	B	B	B	B	A	B	A	B	B	B	B	B	B	B	B	B	A	A	A	A	B	A	A	A	B	-	A	B	A	A	B	A	B	B	A	B	A	A	B	A	B	B	B	A
S4_784865_B	4	784865	3.042	A	A	B	B	B	B	A	-	A	B	B	B	B	B	B	B	B	B	A	A	A	A	B	B	A	A	B	-	A	B	A	A	B	A	B	B	A	B	A	A	B	A	B	B	B	A
S4_1010468_B	4	1010468	3.042	A	A	B	B	B	B	A	B	A	B	B	B	B	B	B	B	B	B	A	A	A	A	B	B	A	A	B	-	A	B	A	A	B	A	B	B	A	B	A	A	B	A	B	B	B	A
S4_1010474_B	4	1010474	3.042	A	A	B	B	B	B	A	B	A	B	B	B	B	B	B	B	B	B	A	A	A	A	B	B	A	A	B	-	A	B	A	A	B	A	B	B	A	B	A	A	B	A	B	B	B	A
S4_1120014_B	4	1120014	3.58	A	A	B	B	B	B	A	B	A	B	B	B	B	B	B	B	B	B	A	A	A	-	B	-	A	A	B	-	A	B	A	A	B	A	B	B	A	B	A	A	B	A	B	B	B	A
S4_1260752_B	4	1260752	3.58	A	A	B	B	B	B	A	B	-	B	B	B	B	B	B	B	B	B	A	A	A	A	B	A	A	A	B	B	A	B	A	A	B	A	B	B	A	B	A	A	B	A	B	-	B	A
S4_1463179_B	4	1463179	3.58	A	A	B	B	B	B	A	-	A	B	B	B	B	B	B	B	B	B	A	A	A	A	B	A	A	A	B	A	A	B	A	A	B	A	B	-	A	B	A	A	B	A	B	B	B	A
S4_1467863_B	4	1467863	3.58	A	A	B	B	B	B	A	B	A	B	B	B	B	B	B	B	B	B	A	A	A	A	B	A	A	A	B	B	A	B	A	A	B	A	B	-	A	B	A	A	B	A	B	B	B	A
S4_1467865_B	4	1467865	3.58	A	A	B	B	B	B	A	B	A	B	B	B	B	B	B	B	B	B	A	A	A	A	B	A	A	A	B	B	A	B	A	A	B	A	B	-	A	B	A	A	B	A	B	B	B	A
S4_1467867_B	4	1467867	3.58	A	A	B	B	B	B	A	B	A	B	B	B	B	B	B	B	B	B	A	A	A	A	B	A	A	A	B	B	A	B	A	A	B	A	B	-	A	B	A	A	B	A	B	B	B	A
S4_1467868_B	4	1467868	3.58	A	A	B	B	B	B	A	B	A	B	B	B	B	B	B	B	B	B	A	A	A	A	B	A	A	A	B	B	A	B	A	A	B	A	B	-	A	B	A	A	B	A	B	B	B	A
S4_1467869_B	4	1467869	3.58	A	A	B	B	B	B	A	B	A	B	B	B	B	B	B	B	B	B	A	A	A	A	B	A	A	A	B	B	A	B	A	A	B	A	B	-	A	B	A	A	B	A	B	B	B	A
S4_1470760_B	4	1470760	3.58	A	A	B	B	B	B	A	-	A	B	B	B	B	B	B	B	B	B	A	A	A	A	B	A	A	A	B	-	A	B	A	A	B	A	B	-	A	B	A	A	B	A	B	B	B	A
S4_2236344	4	2236344	8.3	A	A	B	A	B	B	A	-	A	-	B	B	B	B	B	-	A	A	A	A	A	A	B	A	A	A	B	-	A	B	A	A	B	A	B	B	A	B	A	-	B	B	B	B	B	A
S4_2242896	4	2242896	8.3	A	A	B	A	B	-	A	B	A	-	B	B	B	B	B	-	A	A	A	A	A	A	B	A	A	A	B	B	A	B	A	A	B	A	B	B	A	B	A	B	B	B	B	B	B	A
S4_2242898	4	2242898	8.3	A	A	B	A	B	-	A	B	A	-	B	B	B	B	B	-	A	A	A	A	A	A	B	A	A	A	B	B	A	B	A	A	B	A	B	B	A	B	A	B	B	B	B	B	B	A
S4_3668265	4	3668265	13.677	A	A	B	B	B	B	A	-	A	-	B	A	A	A	A	B	-	A	A	A	A	A	B	A	A	A	B	-	A	B	A	A	B	B	B	B	A	B	A	-	B	B	A	B	B	A
S4_3668266	4	3668266	13.677	A	A	B	B	B	B	A	-	A	-	B	A	A	A	A	B	-	A	A	A	A	A	B	A	A	A	B	-	A	B	A	A	B	B	B	B	A	B	A	-	B	B	A	B	B	A
S4_3668267	4	3668267	13.677	A	A	B	B	B	B	A	-	A	-	B	A	A	A	A	B	-	A	A	A	A	A	B	A	A	A	B	-	A	B	A	A	B	B	B	B	A	B	A	-	B	B	A	B	B	A
S4_3695568	4	3695568	15.308	-	A	B	B	B	B	A	-	A	B	B	A	A	A	A	-	-	A	A	A	A	A	B	A	A	A	B	-	A	B	A	A	B	B	B	B	A	B	A	A	B	B	A	B	B	A
S4_3695569	4	3695569	15.308	-	A	B	B	B	B	A	-	A	B	B	A	A	A	A	-	-	A	A	A	A	A	B	A	A	A	B	-	A	B	A	A	B	B	B	B	A	B	A	A	B	B	A	B	B	A
S4_3695570	4	3695570	15.308	-	A	B	B	B	B	A	-	A	B	B	A	A	A	A	-	-	A	A	A	A	A	B	A	A	A	B	-	A	B	A	A	B	B	B	B	A	B	A	A	B	B	A	B	B	A
S4_4240437	4	4240437	22.771	-	B	B	B	A	B	A	A	A	-	B	A	A	A	A	-	A	A	A	A	A	A	B	A	A	A	B	A	B	B	B	A	B	B	B	A	A	B	A	-	B	B	A	B	B	A
S4_4240439	4	4240439	22.771	-	B	B	B	A	B	A	A	A	-	B	A	A	A	A	-	A	A	A	A	A	A	B	A	A	A	B	A	B	B	B	A	B	B	B	A	A	B	A	-	B	B	A	B	B	A
S4_4240470	4	4240470	22.771	-	B	B	B	A	B	A	A	A	-	B	A	A	A	A	-	A	A	A	A	A	A	B	A	A	A	B	A	B	B	B	A	B	B	B	A	A	B	A	-	B	B	A	B	B	A
S4_4361865_B	4	4361865	24.97	A	B	B	B	A	B	A	B	A	-	B	A	A	A	A	B	B	A	A	A	A	A	B	-	A	A	B	A	B	B	B	A	B	B	B	A	A	B	A	-	B	B	A	B	B	A
S4_4361866_B	4	4361866	24.97	A	B	B	B	A	B	A	B	A	-	B	A	A	A	A	B	B	A	A	A	A	A	B	-	A	A	B	A	B	B	B	A	B	B	B	A	A	B	A	-	B	B	A	B	B	A
S4_4361867_B	4	4361867	24.97	A	B	B	B	A	B	A	B	A	-	B	A	A	A	A	B	B	A	A	A	A	A	B	-	A	A	B	A	B	B	B	A	B	B	B	A	A	B	A	-	B	B	A	B	B	A
S4_5338525	4	5338525	35.803	A	B	B	A	A	B	A	A	A	B	B	A	A	A	A	-	-	A	A	A	A	A	B	A	A	A	B	A	A	B	B	A	A	B	B	A	B	B	B	A	B	B	-	B	B	B
S4_5338526	4	5338526	35.803	A	B	B	A	A	B	A	A	A	B	B	A	A	A	A	-	-	A	A	A	A	A	B	A	A	A	B	A	A	B	B	A	A	B	B	A	B	B	B	A	B	B	-	B	B	B
S4_5338527	4	5338527	35.803	A	B	B	A	A	B	A	A	A	B	B	A	A	A	A	-	-	A	A	A	A	A	B	A	A	A	B	A	A	B	B	A	A	B	B	A	B	B	B	A	B	B	-	B	B	B
S4_6475219	4	6475219	46.072	A	B	B	A	A	B	A	A	A	B	B	A	B	B	A	-	-	B	A	B	B	A	B	B	A	A	B	A	A	B	B	A	B	B	A	B	B	B	B	-	B	A	-	B	B	B
S4_6475260	4	6475260	46.072	A	B	B	A	A	B	A	A	A	B	B	A	B	B	A	-	-	B	A	B	B	A	B	B	A	A	B	A	A	B	B	A	B	B	A	B	B	B	B	-	B	A	-	B	B	B
S4_6475266	4	6475266	46.072	A	B	B	A	A	B	A	A	A	B	B	A	B	B	A	-	-	B	A	B	B	A	B	B	A	A	B	A	A	B	B	A	B	B	A	B	B	B	B	-	B	A	-	B	B	B
S4_7969069	4	7969069	50.736	A	B	B	A	A	B	A	A	A	B	B	A	B	B	A	A	-	-	A	B	B	A	B	B	-	-	B	A	A	B	B	B	B	B	A	A	B	B	B	A	A	A	A	B	B	B
S4_7969070	4	7969070	50.736	A	B	B	A	A	B	A	A	A	B	B	A	B	B	A	A	-	-	A	B	B	A	B	B	-	-	B	A	A	B	B	B	B	B	A	A	B	B	B	A	A	A	A	B	B	B
S4_7969071	4	7969071	50.736	A	B	B	A	A	B	A	A	A	B	B	A	B	B	A	A	-	-	A	B	B	A	B	B	-	-	B	A	A	B	B	B	B	B	A	A	B	B	B	A	A	A	A	B	B	B
S4_8679861	4	8679861	53.486	-	B	B	A	A	B	A	A	A	B	B	A	B	B	A	A	-	-	A	B	B	A	B	B	B	-	A	A	A	B	B	A	B	B	A	A	B	B	B	A	A	A	-	B	B	B
S4_8679862	4	8679862	53.486	-	B	B	A	A	B	A	A	A	B	B	A	B	B	A	A	-	-	A	B	B	A	B	B	B	-	A	A	A	B	B	A	B	B	A	A	B	B	B	A	A	A	-	B	B	B
S4_8679863	4	8679863	53.486	-	B	B	A	A	B	A	A	A	B	B	A	B	B	A	A	-	-	A	B	B	A	B	B	B	-	A	A	A	B	B	A	B	B	A	A	B	B	B	A	A	A	-	B	B	B
S4_8679864	4	8679864	53.486	-	B	B	A	A	B	A	A	A	B	B	A	B	B	A	A	-	-	A	B	B	A	B	B	B	-	A	A	A	B	B	A	B	B	A	A	B	B	B	A	A	A	-	B	B	B
S4_8721993	4	8721993	54.013	B	B	B	A	A	B	A	A	A	B	B	A	B	B	A	A	-	-	A	B	B	A	B	B	-	A	A	A	A	B	B	A	B	B	A	A	B	B	B	A	A	A	-	B	B	B
S4_8722003	4	8722003	54.013	B	B	B	A	A	B	A	A	A	B	B	A	B	B	A	A	-	-	A	B	B	A	B	B	-	A	A	A	A	B	B	A	B	B	A	A	B	B	B	A	A	A	-	B	B	B
S4_8758659	4	8758659	54.013	B	B	B	A	A	B	A	A	A	B	B	A	B	B	A	A	-	B	A	B	B	A	B	B	-	-	A	A	A	B	B	A	B	B	A	A	B	B	B	A	A	A	B	B	B	B
S4_8758660	4	8758660	54.013	B	B	B	A	A	B	A	A	A	B	B	A	B	B	A	A	-	B	A	B	B	A	B	B	-	-	A	A	A	B	B	A	B	B	A	A	B	B	B	A	A	A	B	B	B	B
S4_8758661	4	8758661	54.013	B	B	B	A	A	B	A	A	A	B	B	A	B	B	A	A	-	B	A	B	B	A	B	B	-	-	A	A	A	B	B	A	B	B	A	A	B	B	B	A	A	A	B	B	B	B
S4_8758662	4	8758662	54.013	B	B	B	A	A	B	A	A	A	B	B	A	B	B	A	A	-	B	A	B	B	A	B	B	-	-	A	A	A	B	B	A	B	B	A	A	B	B	B	A	A	A	B	B	B	B
S4_8758748	4	8758748	54.013	B	B	B	A	A	B	A	A	A	B	B	A	B	B	A	A	-	-	A	B	B	A	B	B	-	-	A	A	A	B	B	A	B	B	A	A	B	B	B	A	A	A	-	B	B	B
S4_9862954	4	9862954	60.443	B	-	B	A	A	B	B	A	A	B	B	A	B	B	A	A	-	B	A	B	B	A	B	B	-	B	A	A	A	B	B	A	B	B	A	A	B	B	B	A	A	A	A	B	B	A
S4_9862989	4	9862989	60.443	B	-	B	A	A	B	B	A	A	B	B	A	B	B	A	A	-	B	A	B	B	A	B	B	-	B	A	A	A	B	B	A	B	B	A	A	B	B	B	A	A	A	A	B	B	A
S4_9862990	4	9862990	60.443	B	-	B	A	A	B	B	A	A	B	B	A	B	B	A	A	-	B	A	B	B	A	B	B	-	B	A	A	A	B	B	A	B	B	A	A	B	B	B	A	A	A	A	B	B	A
S4_9862991	4	9862991	60.443	B	-	B	A	A	B	B	A	A	B	B	A	B	B	A	A	-	B	A	B	B	A	B	B	-	B	A	A	A	B	B	A	B	B	A	A	B	B	B	A	A	A	A	B	B	A
S4_11072615	4	11072615	63.745	B	-	B	A	A	B	A	A	B	B	B	A	B	B	A	A	B	B	A	B	B	A	A	B	B	B	A	A	A	A	B	A	B	B	A	A	B	B	B	A	A	A	A	B	B	A
S4_11072616	4	11072616	63.745	B	-	B	A	A	B	A	A	B	B	B	A	B	B	A	A	B	B	A	B	B	A	A	B	B	B	A	A	A	A	B	A	B	B	A	A	B	B	B	A	A	A	A	B	B	A
S4_11072650	4	11072650	63.745	B	-	B	A	A	B	A	A	B	B	B	A	B	B	A	A	B	B	A	B	B	A	A	B	B	B	A	A	A	A	B	A	B	B	A	A	B	B	B	A	A	A	A	B	B	A
S4_11112226	4	11112226	63.745	B	B	B	A	A	B	-	A	B	B	B	A	B	B	A	A	B	B	A	B	B	A	-	B	B	B	A	A	A	A	B	A	B	B	A	A	B	B	B	A	A	A	A	B	B	A
S4_11112238	4	11112238	63.745	B	B	B	A	A	B	-	A	B	B	B	A	B	B	A	A	B	B	A	B	B	A	-	B	B	B	A	A	A	A	B	A	B	B	A	A	B	B	B	A	A	A	A	B	B	A
S4_11424261	4	11424261	63.745	B	B	B	A	A	B	B	A	B	B	B	A	B	B	A	A	-	B	A	B	B	A	B	B	B	B	A	A	A	A	B	A	B	B	A	A	B	B	B	A	A	A	A	B	B	A
S4_10432200	4	10432200	64.265	B	B	B	A	A	B	-	A	B	B	B	A	B	B	A	A	A	B	A	B	B	A	-	B	B	B	A	A	A	A	B	A	B	B	A	A	B	B	B	A	A	A	A	B	B	A
S4_11012920	4	11012920	64.265	B	-	B	A	A	B	B	A	B	B	B	A	B	B	A	A	-	B	A	B	B	A	A	B	B	B	A	A	A	A	B	A	B	B	A	A	B	B	B	A	A	A	A	B	B	A
S4_11036892	4	11036892	64.265	B	B	B	A	A	B	-	A	B	B	B	A	B	B	A	A	-	B	A	B	B	A	A	B	B	B	A	A	A	A	B	A	B	B	A	A	B	B	B	A	A	A	A	B	B	A
S4_11180355	4	11180355	64.265	B	-	B	A	A	B	-	A	B	B	B	A	B	B	A	A	A	B	A	B	B	A	A	B	B	B	A	A	A	A	B	A	B	B	A	A	B	B	B	A	A	A	A	B	B	A
S4_11180378	4	11180378	64.265	B	-	B	A	A	B	-	A	B	B	B	A	B	B	A	A	A	B	A	B	B	A	A	B	B	B	A	A	A	A	B	A	B	B	A	A	B	B	B	A	A	A	A	B	B	A
S4_11197900	4	11197900	64.265	B	-	B	A	A	B	B	A	B	B	B	A	B	B	A	A	-	B	A	B	B	A	B	B	B	B	A	A	A	A	B	A	B	B	A	A	B	B	B	A	A	A	A	B	B	A
S4_11239287	4	11239287	64.265	B	B	B	A	A	B	-	A	B	B	B	A	B	B	A	A	-	B	-	B	B	A	B	B	B	B	A	A	A	A	B	A	B	B	A	A	B	B	B	A	A	A	A	B	B	A
S4_11117662	4	11117662	64.792	B	-	B	A	A	B	-	A	B	B	B	A	B	B	A	A	A	B	A	B	B	A	B	B	B	B	A	A	A	A	B	A	B	B	A	A	B	B	B	A	A	A	A	B	B	A
S4_11117663	4	11117663	64.792	B	-	B	A	A	B	-	A	B	B	B	A	B	B	A	A	A	B	A	B	B	A	B	B	B	B	A	A	A	A	B	A	B	B	A	A	B	B	B	A	A	A	A	B	B	A
S4_11117664	4	11117664	64.792	B	-	B	A	A	B	-	A	B	B	B	A	B	B	A	A	A	B	A	B	B	A	B	B	B	B	A	A	A	A	B	A	B	B	A	A	B	B	B	A	A	A	A	B	B	A
S4_11117666	4	11117666	64.792	B	-	B	A	A	B	-	A	B	B	B	A	B	B	A	A	A	B	A	B	B	A	B	B	B	B	A	A	A	A	B	A	B	B	A	A	B	B	B	A	A	A	A	B	B	A
S4_11238954	4	11238954	64.792	B	B	B	A	A	B	A	A	B	B	B	A	B	B	A	A	-	B	A	B	B	A	B	B	B	B	A	A	A	A	B	A	B	B	A	A	B	B	B	A	A	A	A	B	B	A
S4_11521363	4	11521363	65.318	B	-	B	A	A	B	-	A	B	B	B	A	B	B	A	A	-	B	A	B	B	A	B	B	B	B	A	A	A	A	B	A	B	B	A	A	B	B	B	A	A	A	A	B	B	A
S4_11521370	4	11521370	65.318	B	-	B	A	A	B	-	A	B	B	B	A	B	B	A	A	-	B	A	B	B	A	B	B	B	B	A	A	A	A	B	A	B	B	A	A	B	B	B	A	A	A	A	B	B	A
S4_11521582	4	11521582	65.318	B	-	B	A	A	B	-	A	B	B	B	A	B	B	A	A	-	B	A	B	B	A	B	B	B	B	A	A	A	A	B	A	B	B	A	A	B	B	B	A	A	A	A	B	B	A
S4_11531343	4	11531343	65.318	B	A	B	A	A	B	-	A	B	B	B	A	B	B	A	A	-	B	A	B	B	A	B	B	B	B	A	A	A	A	B	A	B	B	A	A	B	B	B	A	A	A	A	B	B	A
S4_11531344	4	11531344	65.318	B	A	B	A	A	B	-	A	B	B	B	A	B	B	A	A	-	B	A	B	B	A	B	B	B	B	A	A	A	A	B	A	B	B	A	A	B	B	B	A	A	A	A	B	B	A
S4_11531345	4	11531345	65.318	B	A	B	A	A	B	-	A	B	B	B	A	B	B	A	A	-	B	A	B	B	A	B	B	B	B	A	A	A	A	B	A	B	B	A	A	B	B	B	A	A	A	A	B	B	A
S4_11531346	4	11531346	65.318	B	A	B	A	A	B	-	A	B	B	B	A	B	B	A	A	-	B	A	B	B	A	B	B	B	B	A	A	A	A	B	A	B	B	A	A	B	B	B	A	A	A	A	B	B	A
S4_12202135	4	12202135	66.36	B	B	B	A	A	B	B	A	B	B	B	A	B	B	A	A	-	B	A	B	B	A	A	B	B	B	A	A	A	A	B	A	B	B	A	A	B	B	B	A	A	A	A	B	B	A
S4_12202153	4	12202153	66.36	B	B	B	A	A	B	B	A	B	B	B	A	B	B	A	A	-	B	A	B	B	A	A	B	B	B	A	A	A	A	B	A	B	B	A	A	B	B	B	A	A	A	A	B	B	A
S4_12234368	4	12234368	66.36	B	-	B	A	A	B	B	A	B	B	B	A	B	B	A	A	B	B	A	B	B	A	A	B	B	B	A	A	A	A	B	A	B	B	A	A	B	B	B	A	A	A	A	B	B	A
S4_12233550	4	12233550	67.876	B	A	B	A	A	B	B	A	B	B	B	A	B	B	A	A	-	B	A	B	B	A	-	B	B	B	A	A	A	A	B	A	B	B	A	A	B	B	B	A	A	A	A	B	B	A
S4_12244152	4	12244152	67.876	B	-	B	A	A	B	B	A	B	B	B	A	B	B	A	A	-	B	A	B	B	A	-	B	B	B	A	A	A	A	B	A	B	B	A	A	B	B	B	A	A	A	A	B	B	A
S4_12244153	4	12244153	67.876	B	-	B	A	A	B	B	A	B	B	B	A	B	B	A	A	-	B	A	B	B	A	-	B	B	B	A	A	A	A	B	A	B	B	A	A	B	B	B	A	A	A	A	B	B	A
S4_12244154	4	12244154	67.876	B	-	B	A	A	B	B	A	B	B	B	A	B	B	A	A	-	B	A	B	B	A	-	B	B	B	A	A	A	A	B	A	B	B	A	A	B	B	B	A	A	A	A	B	B	A
S4_12409946	4	12409946	69.407	B	-	B	A	A	B	-	A	B	B	B	A	B	B	A	A	A	A	A	B	B	A	-	B	B	B	A	A	A	A	B	A	B	B	A	A	B	B	B	A	A	A	A	B	B	A
S4_12431092	4	12431092	69.407	B	-	B	A	A	B	-	A	B	B	B	A	B	B	A	A	A	A	A	B	B	A	A	B	B	B	A	A	A	A	B	A	B	B	A	A	B	B	B	A	A	A	A	B	B	A
S4_12431311	4	12431311	69.407	B	-	B	A	A	B	B	A	B	B	B	A	B	B	A	A	A	A	A	B	B	A	A	B	B	B	A	A	A	A	B	A	B	B	A	A	B	B	B	A	A	A	A	B	B	A
S4_12431357	4	12431357	69.407	B	-	B	A	A	B	B	A	B	B	B	A	B	B	A	A	A	A	A	B	B	A	A	B	B	B	A	A	A	A	B	A	B	B	A	A	B	B	B	A	A	A	A	B	B	A
S4_15080687	4	15080687	69.407	B	A	B	A	A	B	A	A	B	B	B	A	B	B	A	A	A	A	A	B	B	A	A	B	B	B	A	A	A	A	B	A	B	B	A	A	B	B	B	A	A	A	A	B	B	A
S4_15080688	4	15080688	69.407	B	A	B	A	A	B	A	A	B	B	B	A	B	B	A	A	A	A	A	B	B	A	A	B	B	B	A	A	A	A	B	A	B	B	A	A	B	B	B	A	A	A	A	B	B	A
S4_15171174	4	15171174	69.407	B	-	B	A	A	B	-	A	B	B	B	A	B	B	A	A	A	A	A	B	B	A	B	B	B	B	A	A	A	A	B	A	B	B	A	A	B	B	B	A	A	A	A	B	B	A
S4_15171204	4	15171204	69.407	B	-	B	A	A	B	-	A	B	B	B	A	B	B	A	A	A	A	A	B	B	A	B	B	B	B	A	A	A	A	B	A	B	B	A	A	B	B	B	A	A	A	A	B	B	A
S4_15710849	4	15710849	69.407	B	-	B	A	A	B	-	A	B	B	B	A	B	B	A	A	A	A	A	B	B	A	-	B	B	B	A	A	A	A	B	A	B	B	A	A	B	B	B	A	A	A	A	B	B	A
S4_15710850	4	15710850	69.407	B	-	B	A	A	B	-	A	B	B	B	A	B	B	A	A	A	A	A	B	B	A	-	B	B	B	A	A	A	A	B	A	B	B	A	A	B	B	B	A	A	A	A	B	B	A
S4_15874384	4	15874384	69.407	B	-	B	A	A	B	B	A	B	B	B	A	B	B	A	A	A	A	A	B	B	A	A	B	B	B	A	A	A	A	B	A	B	B	A	A	B	B	B	A	A	A	A	B	B	A
S4_45945187	4	45945187	70.407	B	-	B	A	A	B	-	A	B	B	B	A	B	B	A	A	A	A	A	B	B	A	-	B	B	B	A	A	A	A	B	B	B	B	A	A	B	B	A	A	A	A	A	B	B	A
S4_46534513	4	46534513	70.407	B	B	B	A	A	B	-	A	B	B	B	A	B	B	A	A	A	A	A	B	B	A	B	B	B	B	A	A	A	A	B	B	B	B	A	A	B	B	A	A	A	A	A	B	B	A
S4_46534642	4	46534642	70.407	B	-	B	A	A	B	-	A	B	B	B	A	B	B	A	A	A	A	A	B	B	A	-	B	B	B	A	A	A	A	B	B	B	B	A	A	B	B	A	A	A	A	A	B	B	A
S4_46537718	4	46537718	70.407	B	-	B	A	A	B	B	A	B	B	B	A	B	B	A	A	A	A	A	B	B	A	-	B	B	B	A	A	A	A	B	B	B	B	A	A	B	B	A	A	A	A	A	B	B	A
S4_48609207	4	48609207	70.407	B	A	B	A	A	B	B	A	B	B	B	A	B	B	A	A	A	A	A	B	B	A	-	B	B	B	A	A	A	A	B	B	B	B	A	A	B	B	A	A	A	A	A	B	B	A
S4_46851857	4	46851857	70.912	B	B	B	A	A	B	A	A	B	B	B	A	B	B	A	A	A	A	A	B	B	A	B	B	B	B	A	A	A	A	B	B	B	B	A	A	B	B	A	A	A	A	A	B	B	A
S4_48385682	4	48385682	70.912	B	-	B	A	A	B	-	A	B	B	B	A	B	B	A	A	A	A	A	B	B	A	B	B	B	B	A	A	A	A	B	B	B	B	A	A	B	B	A	A	A	A	A	B	B	A
S4_48385710	4	48385710	70.912	B	-	B	A	A	B	-	A	B	B	B	A	B	B	A	A	A	A	A	B	B	A	B	B	B	B	A	A	A	A	B	B	B	B	A	A	B	B	A	A	A	A	A	B	B	A
S4_48385711	4	48385711	70.912	B	-	B	A	A	B	-	A	B	B	B	A	B	B	A	A	A	A	A	B	B	A	B	B	B	B	A	A	A	A	B	B	B	B	A	A	B	B	A	A	A	A	A	B	B	A
S4_48977799	4	48977799	71.422	B	-	B	A	A	B	B	A	B	B	B	A	B	B	A	A	A	A	A	B	B	A	-	B	B	B	A	A	A	A	B	B	B	B	A	A	B	B	A	A	A	A	A	B	B	A
S4_49061812	4	49061812	71.422	B	B	B	A	A	B	B	A	B	B	B	A	B	B	A	A	A	A	A	B	B	A	-	B	B	B	A	A	A	A	B	B	B	B	A	A	B	B	A	A	A	A	A	B	B	A
S4_49061813	4	49061813	71.422	B	B	B	A	A	B	B	A	B	B	B	A	B	B	A	A	A	A	A	B	B	A	-	B	B	B	A	A	A	A	B	B	B	B	A	A	B	B	A	A	A	A	A	B	B	A
S4_49069526	4	49069526	71.422	B	-	B	A	A	B	-	A	B	B	B	A	B	B	A	A	A	A	A	B	B	A	B	B	B	B	A	A	A	A	B	B	B	B	A	A	B	B	A	A	A	A	A	B	B	A
S4_49069528	4	49069528	71.422	B	-	B	A	A	B	-	A	B	B	B	A	B	B	A	A	A	A	A	B	B	A	B	B	B	B	A	A	A	A	B	B	B	B	A	A	B	B	A	A	A	A	A	B	B	A
S4_49119820	4	49119820	71.422	B	-	B	A	A	B	-	A	B	B	B	A	B	B	A	A	A	A	A	B	B	A	-	B	B	B	A	A	A	A	B	B	B	B	A	A	B	B	A	A	A	A	A	B	B	A
S4_49128288	4	49128288	71.422	B	B	B	A	A	B	-	A	B	B	B	A	B	B	A	A	A	A	A	B	B	A	-	B	B	B	A	A	A	A	B	B	B	B	A	A	B	B	A	A	A	A	A	B	B	A
S4_49135280	4	49135280	71.422	B	-	B	A	A	B	-	A	B	B	B	A	B	B	A	A	A	A	A	B	B	A	-	B	B	B	A	A	A	A	B	B	B	B	A	A	B	B	A	A	A	A	A	B	B	A
S4_49135294	4	49135294	71.422	B	-	B	A	A	B	-	A	B	B	B	A	B	B	A	A	A	A	A	B	B	A	-	B	B	B	A	A	A	A	B	B	B	B	A	A	B	B	A	A	A	A	A	B	B	A
S4_49135330	4	49135330	71.422	B	B	B	A	A	B	A	A	B	B	B	A	B	B	A	A	A	A	A	B	B	A	-	B	B	B	A	A	A	A	B	B	B	B	A	A	B	B	A	A	A	A	A	B	B	A
S4_49135445	4	49135445	71.422	B	A	B	A	A	B	B	A	B	B	B	A	B	B	A	A	A	A	A	B	B	A	-	B	B	B	A	A	A	A	B	B	B	B	A	A	B	B	A	A	A	A	A	B	B	A
S4_49481137	4	49481137	71.422	B	-	B	A	A	B	-	A	B	B	B	A	B	B	A	A	A	A	A	B	B	A	-	B	B	B	A	A	A	A	B	B	B	B	A	A	B	B	A	A	A	A	A	B	B	A
S4_49481138	4	49481138	71.422	B	-	B	A	A	B	-	A	B	B	B	A	B	B	A	A	A	A	A	B	B	A	-	B	B	B	A	A	A	A	B	B	B	B	A	A	B	B	A	A	A	A	A	B	B	A
S4_49481170	4	49481170	71.422	B	-	B	A	A	B	-	A	B	B	B	A	B	B	A	A	A	A	A	B	B	A	-	B	B	B	A	A	A	A	B	B	B	B	A	A	B	B	A	A	A	A	A	B	B	A
S4_49481171	4	49481171	71.422	B	-	B	A	A	B	-	A	B	B	B	A	B	B	A	A	A	A	A	B	B	A	B	B	B	B	A	A	A	A	B	B	B	B	A	A	B	B	A	A	A	A	A	B	B	A
S4_49503635	4	49503635	71.422	B	A	B	A	A	B	-	A	B	B	B	A	B	B	A	A	A	A	A	B	B	A	-	B	B	B	A	A	A	A	B	B	B	B	A	A	B	B	A	A	A	A	A	B	B	A
S4_49127719	4	49127719	71.938	B	B	-	A	A	B	-	A	B	B	B	A	B	B	A	A	A	A	A	B	B	A	-	B	B	B	A	A	A	A	B	B	B	B	A	A	B	B	A	A	A	A	A	B	B	A
S4_49581490	4	49581490	71.938	B	B	B	A	A	B	-	A	B	B	B	A	B	B	A	A	A	A	A	B	B	A	A	B	B	B	A	A	A	A	B	B	B	B	A	A	B	B	A	A	A	A	A	B	B	A
S4_49581493	4	49581493	71.938	B	B	B	A	A	B	-	A	B	B	B	A	B	B	A	A	A	A	A	B	B	A	A	B	B	B	A	A	A	A	B	B	B	B	A	A	B	B	A	A	A	A	A	B	B	A
S4_49743239	4	49743239	71.938	B	B	B	A	A	B	-	A	B	B	B	A	B	B	A	A	A	A	A	B	B	A	A	B	B	B	A	A	A	A	B	B	B	B	A	A	B	B	A	A	A	A	A	B	B	A
S4_49743258	4	49743258	71.938	B	B	B	A	A	B	-	A	B	B	B	A	B	B	A	A	A	A	A	B	B	A	A	B	B	B	A	A	A	A	B	B	B	B	A	A	B	B	A	A	A	A	A	B	B	A
S4_48098801	4	48098801	72.433	B	-	B	A	A	B	B	A	B	B	B	A	B	B	A	A	A	A	A	B	B	A	-	B	B	B	A	A	A	A	B	B	B	B	A	A	B	B	A	A	A	A	A	B	B	A
S4_48520527	4	48520527	72.433	B	-	B	A	A	B	-	A	B	B	B	A	B	B	A	A	A	A	A	B	B	A	A	B	B	B	A	A	A	A	B	B	B	B	A	A	B	B	A	A	A	A	A	B	B	A
S4_48520554	4	48520554	72.433	B	-	B	A	A	B	-	A	B	B	B	A	B	B	A	A	A	A	A	B	B	A	A	B	B	B	A	A	A	A	B	B	B	B	A	A	B	B	A	A	A	A	A	B	B	A
S4_48612765	4	48612765	72.433	B	A	B	A	A	B	B	A	B	B	B	A	B	B	A	A	A	A	A	B	B	A	A	B	B	B	A	A	A	A	B	B	B	B	A	A	B	B	A	A	A	A	A	B	B	A
S4_48058365	4	48058365	72.923	B	A	B	A	A	B	-	A	B	B	B	A	B	B	A	A	A	A	A	B	B	A	A	B	B	B	A	A	A	A	B	B	B	B	A	A	B	B	A	A	A	A	A	B	B	A
S4_48058379	4	48058379	72.923	B	A	B	A	A	B	-	A	B	B	B	A	B	B	A	A	A	A	A	B	B	A	A	B	B	B	A	A	A	A	B	B	B	B	A	A	B	B	A	A	A	A	A	B	B	A
S4_48428694	4	48428694	72.923	B	A	B	A	A	B	-	A	B	B	B	A	B	B	A	A	A	A	A	B	B	A	A	B	B	B	A	A	A	A	B	B	B	B	A	A	B	B	A	A	A	A	A	B	B	A
S4_49118766	4	49118766	73.903	B	A	B	A	A	B	A	A	B	B	B	A	B	B	A	A	A	A	A	B	B	A	-	B	B	B	A	A	A	A	B	B	B	B	A	A	B	B	A	A	A	A	A	B	B	A
S4_49118800	4	49118800	73.903	B	A	B	A	A	B	A	A	B	B	B	A	B	B	A	A	A	A	A	B	B	A	-	B	B	B	A	A	A	A	B	B	B	B	A	A	B	B	A	A	A	A	A	B	B	A
S4_49118817	4	49118817	73.903	B	A	B	A	A	B	A	A	B	B	B	A	B	B	A	A	A	A	A	B	B	A	-	B	B	B	A	A	A	A	B	B	B	B	A	A	B	B	A	A	A	A	A	B	B	A
S4_49133535	4	49133535	73.903	B	A	B	A	A	B	A	A	B	B	B	A	B	B	A	A	A	A	A	B	B	A	-	B	B	B	A	A	A	A	B	B	B	B	A	A	B	B	A	A	A	A	A	B	B	A
S4_49069462	4	49069462	74.398	B	-	B	A	A	B	A	A	B	B	B	A	B	B	A	A	A	A	A	B	B	A	A	B	B	B	A	A	A	A	B	B	B	B	A	A	B	B	A	A	A	A	A	B	B	A
S4_49118689	4	49118689	74.398	B	-	B	A	A	B	-	A	B	B	B	A	B	B	A	A	A	A	A	B	B	A	A	B	B	B	A	A	A	A	B	B	B	B	A	A	B	B	A	A	A	A	A	B	B	A
S4_49118725	4	49118725	74.398	B	-	B	A	A	B	-	A	B	B	B	A	B	B	A	A	A	A	A	B	B	A	A	B	B	B	A	A	A	A	B	B	B	B	A	A	B	B	A	A	A	A	A	B	B	A
S4_49118742	4	49118742	74.398	B	-	B	A	A	B	-	A	B	B	B	A	B	B	A	A	A	A	A	B	B	A	A	B	B	B	A	A	A	A	B	B	B	B	A	A	B	B	A	A	A	A	A	B	B	A
S4_50669854	4	50669854	75.419	B	-	B	B	A	B	-	A	B	B	B	A	B	B	A	A	A	A	A	B	B	A	-	B	B	B	A	A	A	A	B	B	B	B	A	A	B	B	A	A	A	A	A	B	B	A
S4_50669855	4	50669855	75.419	B	-	B	B	A	B	-	A	B	B	B	A	B	B	A	A	A	A	A	B	B	A	-	B	B	B	A	A	A	A	B	B	B	B	A	A	B	B	A	A	A	A	A	-	B	A
S4_50669856	4	50669856	75.419	B	-	B	B	A	B	-	A	B	B	B	A	B	B	A	A	A	A	A	B	B	A	-	B	B	B	A	A	A	A	B	B	B	B	A	A	B	B	A	A	A	A	A	-	B	A
S4_50854148	4	50854148	76.45	B	-	B	B	A	B	B	A	A	B	B	A	B	B	A	A	A	A	A	B	B	A	B	B	B	B	A	A	A	A	B	B	B	B	A	A	B	B	A	A	A	A	A	A	B	A
S4_50974258	4	50974258	76.45	B	-	B	B	A	B	B	A	A	B	B	A	B	B	A	A	A	A	A	B	B	A	-	B	B	B	A	A	A	A	B	B	B	B	A	A	B	B	A	A	A	A	A	A	B	A
S4_50974259	4	50974259	76.45	B	-	B	B	A	B	B	A	A	B	B	A	B	B	A	A	A	A	A	B	B	A	-	B	B	B	A	A	A	A	B	B	B	B	A	A	B	B	A	A	A	A	A	A	B	A
S4_50974265	4	50974265	76.45	B	-	B	B	A	B	B	A	A	B	B	A	B	B	A	A	A	A	A	B	B	A	-	B	B	B	A	A	A	A	B	B	B	B	A	A	B	B	A	A	A	A	A	A	B	A
S4_51121211	4	51121211	76.45	B	B	B	-	A	B	-	A	A	B	B	-	B	B	A	A	A	A	A	B	B	A	B	B	B	B	A	A	A	A	B	B	B	B	A	A	B	B	A	A	A	A	A	A	B	A
S4_50909800	4	50909800	78.557	B	-	B	-	A	B	A	A	A	B	B	A	B	B	A	A	A	A	A	B	B	A	-	B	B	B	A	A	A	A	B	B	B	B	A	A	B	B	A	A	A	A	A	A	B	A
S4_50909815	4	50909815	78.557	B	-	B	-	A	B	A	A	A	B	B	A	B	B	A	A	A	A	A	B	B	A	-	B	B	B	A	A	A	A	B	B	B	B	A	A	B	B	A	A	A	A	A	A	B	A
S4_51064126	4	51064126	78.557	B	B	B	A	A	B	-	A	A	B	B	A	B	B	A	A	A	A	A	B	B	A	A	B	B	B	A	A	A	A	B	B	B	B	A	A	B	B	A	A	A	A	A	A	B	A
S4_51278797	4	51278797	83.013	B	-	B	A	A	B	B	A	A	B	A	-	B	B	A	A	A	A	A	B	B	A	A	B	B	B	A	A	A	-	B	B	B	B	A	A	B	B	A	A	A	A	A	A	B	A
S4_51427804	4	51427804	83.013	B	-	B	A	A	B	-	A	A	B	A	-	B	B	A	A	A	A	A	B	B	A	-	B	B	B	A	A	A	B	B	B	B	B	A	A	B	B	A	A	A	A	A	A	B	A
S4_51490971	4	51490971	83.013	B	A	B	-	A	B	-	A	A	B	A	B	B	B	A	A	A	A	A	B	B	A	B	B	B	B	A	A	A	-	B	B	B	B	A	A	B	B	A	A	A	A	A	A	B	A
S4_51515841	4	51515841	83.534	B	-	B	-	A	B	B	A	A	B	A	B	B	B	A	A	A	A	A	-	B	A	-	B	B	B	A	A	A	B	B	B	B	B	A	A	B	B	A	A	A	A	A	A	B	B
S4_51833231	4	51833231	83.534	B	A	B	B	A	B	B	A	A	B	A	B	B	B	A	A	A	A	A	-	B	A	A	B	B	B	A	A	A	B	B	B	B	B	A	A	B	B	A	A	A	A	A	A	B	B
S4_51877969	4	51877969	83.534	B	-	B	B	A	B	B	A	A	B	A	B	B	B	A	A	A	A	A	-	B	A	A	B	B	B	A	A	A	B	B	B	B	B	A	A	B	B	A	A	A	A	A	A	B	B
S4_51877975	4	51877975	83.534	B	-	B	B	A	B	B	A	A	B	A	B	B	B	A	A	A	A	A	-	B	A	A	B	B	B	A	A	A	B	B	B	B	B	A	A	B	B	A	A	A	A	A	A	B	B
S4_51877982	4	51877982	83.534	B	-	B	B	A	B	B	A	A	B	A	B	B	B	A	A	A	A	A	-	B	A	A	B	B	B	A	A	A	B	B	B	B	B	A	A	B	B	A	A	A	A	A	A	B	B
S4_53315453	4	53315453	88.092	B	B	B	B	A	B	-	A	B	B	A	B	B	B	A	A	A	A	A	-	B	A	-	B	B	B	A	A	A	-	B	B	A	A	A	A	B	B	A	A	A	A	A	A	B	B
S4_53315454	4	53315454	88.092	B	B	B	B	A	B	-	A	B	B	A	B	B	B	A	A	A	A	A	-	B	A	-	B	B	B	A	A	A	-	B	B	A	A	A	A	B	B	A	A	A	A	A	A	B	B
S4_53315455	4	53315455	88.092	B	B	B	B	A	B	-	A	B	B	A	B	B	B	A	A	A	A	A	-	B	A	-	B	B	B	A	A	A	-	B	B	A	A	A	A	B	B	A	A	A	A	A	A	B	B
S4_53280964	4	53280964	88.618	B	B	B	B	A	B	-	B	B	B	A	-	B	B	A	A	A	A	A	-	B	A	-	B	B	B	A	A	A	-	B	B	-	A	A	A	B	B	A	A	A	A	A	A	B	B
S4_53280973	4	53280973	88.618	B	B	B	B	A	B	-	B	B	B	A	-	B	B	A	A	A	A	A	-	B	A	-	B	B	B	A	A	A	-	B	B	-	A	A	A	B	B	A	A	A	A	A	A	B	B
S4_53281751	4	53281751	88.618	B	-	B	B	A	B	A	B	B	B	A	B	B	B	A	A	A	A	A	A	B	A	B	B	B	B	A	A	A	-	B	B	-	A	A	A	B	B	A	A	A	A	A	A	B	B
S4_53381294	4	53381294	88.618	B	B	B	B	A	B	A	-	B	B	A	-	B	B	A	A	A	A	A	A	B	A	A	B	B	B	A	A	A	A	B	B	-	A	A	A	B	B	A	A	A	A	A	A	B	B
S4_53790263	4	53790263	90.197	B	A	B	B	B	B	-	-	B	B	A	B	B	B	A	A	A	A	A	-	B	A	-	B	B	B	A	A	A	-	B	B	-	A	A	A	B	B	A	A	A	A	A	A	B	B
S4_53790267	4	53790267	90.197	B	A	B	B	B	B	-	-	B	B	A	B	B	B	A	A	A	A	A	-	B	A	-	B	B	B	A	A	A	-	B	B	-	A	A	A	B	B	A	A	A	A	A	A	B	B
S4_53790268	4	53790268	90.197	B	A	B	B	B	B	-	-	B	B	A	B	B	B	A	A	A	A	A	-	B	A	-	B	B	B	A	A	A	-	B	B	-	A	A	A	B	B	A	A	A	A	A	A	B	B
S4_53790315	4	53790315	90.197	B	A	B	B	B	B	-	-	B	B	A	B	B	B	A	A	A	A	A	-	B	A	-	B	B	B	A	A	A	-	B	B	-	A	A	A	B	B	A	A	A	A	A	A	B	B
S4_53980777	4	53980777	90.718	B	A	B	B	B	B	-	A	B	B	A	B	B	-	A	A	A	A	A	-	B	A	-	B	B	-	A	A	A	-	B	B	-	A	A	A	B	B	A	A	A	A	A	A	B	B
S4_53980778	4	53980778	90.718	B	A	B	B	B	B	-	A	B	B	A	B	B	-	A	A	A	A	A	-	B	A	-	B	B	-	A	A	A	-	B	B	-	A	A	A	B	B	A	A	A	A	A	A	B	B
S4_53980780	4	53980780	90.718	B	A	B	B	B	B	-	A	B	B	A	B	B	-	A	A	A	A	A	-	B	A	-	B	B	-	A	A	A	-	B	B	-	A	A	A	B	B	A	A	A	A	A	A	B	B
S4_53980804	4	53980804	91.239	B	A	B	B	B	B	-	A	B	B	A	B	B	B	A	A	A	A	A	-	B	A	A	B	B	B	A	A	A	-	B	B	-	A	A	A	B	B	A	A	A	A	A	A	B	B
S4_53980805	4	53980805	91.239	B	A	B	B	B	B	-	A	B	B	A	B	B	B	A	A	A	A	A	-	B	A	A	B	B	B	A	A	A	-	B	B	-	A	A	A	B	B	A	A	A	A	A	A	B	B
S4_53980806	4	53980806	91.239	B	A	B	B	B	B	-	A	B	B	A	B	B	B	A	A	A	A	A	-	B	A	A	B	B	B	A	A	A	-	B	B	-	A	A	A	B	B	A	A	A	A	A	A	B	B
S4_53922661	4	53922661	92.835	B	A	B	B	B	B	A	B	B	B	A	-	B	B	A	A	A	A	A	-	B	A	-	B	B	B	A	A	A	A	B	B	-	A	A	A	B	B	A	A	A	A	A	A	B	B
S4_53980727	4	53980727	92.835	B	A	B	B	B	B	A	-	B	B	A	-	B	B	A	A	A	A	A	-	B	A	-	B	B	B	A	A	A	A	B	B	A	A	A	A	B	B	A	A	A	A	A	A	B	B
S4_54004500	4	54004500	92.835	B	A	B	B	B	B	-	-	B	B	A	B	B	B	A	A	A	A	A	-	B	A	-	B	B	B	A	A	A	-	B	B	B	A	A	A	B	B	A	A	A	A	A	A	B	B
S4_54004506	4	54004506	92.835	B	A	B	B	B	B	-	-	B	B	A	B	B	B	A	A	A	A	A	-	B	A	-	B	B	B	A	A	A	-	B	B	B	A	A	A	B	B	A	A	A	A	A	A	B	B
S4_54004531	4	54004531	92.835	B	A	B	B	B	B	-	-	B	B	A	B	B	B	A	A	A	A	A	-	B	A	-	B	B	B	A	A	A	-	B	B	B	A	A	A	B	B	A	A	A	A	A	A	B	B
S4_54004548	4	54004548	92.835	B	A	B	B	B	B	-	-	B	B	A	B	B	B	A	A	A	A	A	-	B	A	-	B	B	B	A	A	A	-	B	B	B	A	A	A	B	B	A	A	A	A	A	A	B	B
S4_54015098	4	54015098	92.835	B	A	B	B	B	B	-	-	B	B	A	-	B	B	A	A	A	A	A	A	B	A	-	B	B	B	A	A	A	-	B	B	B	A	A	A	B	B	A	A	A	A	A	A	B	B
S4_55801213	4	55801213	99.118	B	A	B	B	B	B	-	B	B	B	A	-	B	B	A	A	A	A	-	-	B	A	-	A	B	B	A	A	A	-	B	B	A	B	A	A	B	B	A	B	A	B	B	A	B	B
S4_55801219	4	55801219	99.118	B	A	B	B	B	B	-	B	B	B	A	-	B	B	A	A	A	A	-	-	B	A	-	A	B	B	A	A	A	-	B	B	A	B	A	A	B	B	A	B	A	B	B	A	B	B
S4_55998872	4	55998872	99.118	B	A	B	B	B	B	A	B	B	B	A	A	B	B	A	A	A	A	A	A	B	A	B	A	B	B	A	A	A	A	B	B	A	B	A	A	B	B	A	-	A	B	B	A	B	B
S4_55998874	4	55998874	99.118	B	A	B	B	B	B	A	B	B	B	A	A	B	B	A	A	A	A	A	A	B	A	B	A	B	B	A	A	A	A	B	B	A	B	A	A	B	B	A	-	A	B	B	A	B	B
S4_55679958	4	55679958	99.629	B	A	B	B	B	B	-	B	B	B	A	B	B	B	A	A	A	A	A	-	B	A	-	A	B	B	A	A	A	-	B	B	A	B	A	A	B	B	A	A	A	B	B	A	B	B
S4_55716296	4	55716296	99.629	B	A	B	B	B	B	-	B	B	B	A	-	B	B	A	A	A	A	A	-	B	A	-	A	B	B	A	A	A	A	B	B	A	B	A	A	B	B	A	-	A	B	B	A	B	B
S4_55716298	4	55716298	99.629	B	A	B	B	B	B	-	B	B	B	A	-	B	B	A	A	A	A	A	-	B	A	-	A	B	B	A	A	A	A	B	B	A	B	A	A	B	B	A	-	A	B	B	A	B	B
S4_55716346	4	55716346	99.629	B	A	B	B	B	B	-	B	B	B	A	-	B	B	A	A	A	A	A	-	B	A	-	A	B	B	A	A	A	A	B	B	A	B	A	A	B	B	A	-	A	B	B	A	B	B
S4_55745149	4	55745149	99.629	B	A	B	B	B	B	-	B	B	B	A	-	B	B	A	A	A	A	A	-	B	A	-	A	B	B	A	A	A	-	B	B	A	B	A	A	B	B	A	-	A	B	B	A	B	B
S4_55772490	4	55772490	99.629	B	A	B	B	B	B	-	B	B	B	A	B	B	B	A	A	A	A	A	B	B	A	A	A	B	B	A	A	A	-	B	B	A	B	A	A	B	B	A	-	A	B	B	A	B	B
S4_55772585	4	55772585	99.629	B	A	B	B	B	B	-	B	B	B	A	B	B	B	A	A	A	A	A	B	B	A	-	A	B	B	A	A	A	-	B	B	A	B	A	A	B	B	A	A	A	B	B	A	B	B
S4_55772590	4	55772590	99.629	B	A	B	B	B	B	-	B	B	B	A	B	B	B	A	A	A	A	A	B	B	A	-	A	B	B	A	A	A	-	B	B	A	B	A	A	B	B	A	A	A	B	B	A	B	B
S4_55780218	4	55780218	99.629	B	A	B	B	B	B	-	B	B	B	A	B	B	B	A	A	A	A	A	B	B	A	B	A	B	B	A	A	A	-	B	B	A	B	A	A	B	B	A	-	A	B	B	A	B	B
S4_55780225	4	55780225	99.629	B	A	B	B	B	B	-	B	B	B	A	B	B	B	A	A	A	A	A	B	B	A	B	A	B	B	A	A	A	-	B	B	A	B	A	A	B	B	A	-	A	B	B	A	B	B
S4_55786812	4	55786812	99.629	B	A	B	B	B	B	-	B	B	B	A	-	B	B	A	A	A	A	A	-	B	A	-	A	B	B	A	A	A	B	B	B	A	B	A	A	B	B	A	-	A	B	B	A	B	B
S4_55801267	4	55801267	99.629	B	A	B	B	B	B	B	B	B	B	A	-	B	B	A	A	A	A	A	-	B	A	-	A	B	B	A	A	A	-	B	B	A	B	A	A	B	B	A	-	A	B	B	A	B	B
S4_55801279	4	55801279	99.629	B	A	B	B	B	B	B	B	B	B	A	-	B	B	A	A	A	A	A	-	B	A	-	A	B	B	A	A	A	-	B	B	A	B	A	A	B	B	A	-	A	B	B	A	B	B
S4_55801300	4	55801300	99.629	B	A	B	B	B	B	B	B	B	B	A	-	B	B	A	A	A	A	A	-	B	A	-	A	B	B	A	A	A	-	B	B	A	B	A	A	B	B	A	-	A	B	B	A	B	B
S4_55881578	4	55881578	99.629	B	A	B	B	B	B	-	B	B	B	A	B	B	B	A	A	A	A	A	B	B	A	-	A	B	B	A	A	A	B	B	B	A	B	A	A	B	B	A	-	A	B	B	A	B	B
S4_55888658	4	55888658	99.629	B	A	B	B	B	B	-	B	B	B	A	-	B	B	A	A	A	A	A	B	B	A	-	A	B	B	A	A	A	-	B	B	A	B	A	A	B	B	A	-	A	B	B	A	B	B
S4_55888659	4	55888659	99.629	B	A	B	B	B	B	-	B	B	B	A	-	B	B	A	A	A	A	A	B	B	A	-	A	B	B	A	A	A	-	B	B	A	B	A	A	B	B	A	-	A	B	B	A	B	B
S4_55935997	4	55935997	99.629	B	A	B	B	B	B	-	B	B	B	A	B	B	B	A	A	A	A	A	-	B	A	-	A	B	B	A	A	A	-	B	B	A	B	A	A	B	B	A	-	A	B	B	A	B	B
S4_55936011	4	55936011	99.629	B	A	B	B	B	B	-	B	B	B	A	B	B	B	A	A	A	A	A	-	B	A	-	A	B	B	A	A	A	B	B	B	A	B	A	A	B	B	A	A	A	B	B	A	B	B
S4_55936136	4	55936136	99.629	B	A	B	B	B	B	A	B	B	B	A	-	B	B	A	A	A	A	A	-	B	A	B	A	B	B	A	A	A	-	B	B	A	B	A	A	B	B	A	-	A	B	B	A	B	B
S4_55988832	4	55988832	99.629	B	A	B	B	B	B	-	B	B	B	A	B	B	B	A	A	A	A	A	-	B	A	-	A	B	B	A	A	A	-	B	B	A	B	A	A	B	B	A	-	A	B	B	A	B	B
S4_56054783	4	56054783	99.629	B	A	B	B	B	B	-	B	B	B	A	-	B	B	A	A	A	A	A	-	B	A	A	A	B	B	A	A	A	-	B	B	A	B	A	A	B	B	A	A	A	B	B	A	B	B
S4_56135274_B	4	56135274	100.66	B	A	B	B	B	B	-	B	B	B	A	-	B	B	A	A	A	A	A	-	B	A	-	A	B	B	A	A	A	-	B	B	A	B	A	A	B	B	A	-	A	B	B	A	B	B
S4_56200609_B	4	56200609	100.66	B	A	B	B	B	B	A	B	B	B	A	B	B	B	A	A	A	A	A	A	B	A	-	A	B	B	A	A	A	B	B	B	A	B	A	A	B	B	A	-	A	B	B	A	B	B
S4_56236474_B	4	56236474	100.66	B	A	B	B	B	B	A	B	B	B	A	-	B	B	A	A	A	A	A	-	B	A	B	A	B	B	A	A	A	-	B	B	A	B	A	A	B	B	A	-	A	B	B	A	B	B
S4_56313039_B	4	56313039	100.66	B	A	B	B	B	B	B	B	B	B	A	-	B	B	A	A	-	A	A	-	B	A	-	A	B	B	A	A	A	-	B	B	A	B	A	A	B	B	A	-	A	B	B	A	B	B
S4_56329791_B	4	56329791	100.66	B	A	B	B	B	B	-	B	B	B	A	A	B	B	A	A	-	A	A	-	B	A	-	A	B	B	A	A	A	B	B	B	A	B	A	A	B	B	A	A	A	B	B	A	B	B
S4_56363506_B	4	56363506	100.66	B	A	B	B	B	B	B	B	B	B	A	B	B	B	A	A	A	A	A	-	B	A	-	A	B	B	A	A	A	B	B	B	A	B	A	A	B	B	A	-	A	B	B	A	B	B
S4_56363543_B	4	56363543	100.66	B	A	B	B	B	B	B	B	B	B	A	B	B	B	A	A	A	A	A	-	B	A	-	A	B	B	A	A	A	B	B	B	A	B	A	A	B	B	A	-	A	B	B	A	B	B
S4_56368463	4	56368463	100.66	B	A	B	B	B	B	A	B	B	B	A	B	B	B	A	A	A	A	A	A	B	A	-	A	B	B	A	A	A	-	B	B	A	B	A	A	B	B	A	A	A	B	B	A	B	B
S4_56368465	4	56368465	100.66	B	A	B	B	B	B	A	B	B	B	A	B	B	B	A	A	A	A	A	A	B	A	-	A	B	B	A	A	A	-	B	B	A	B	A	A	B	B	A	A	A	B	B	A	B	B
S4_56368467	4	56368467	100.66	B	A	B	B	B	B	A	B	B	B	A	B	B	B	A	A	A	A	A	A	B	A	-	A	B	B	A	A	A	-	B	B	A	B	A	A	B	B	A	A	A	B	B	A	B	B
S4_56379881_B	4	56379881	100.66	B	A	B	B	B	B	-	B	B	B	A	B	B	B	A	A	-	A	A	-	B	A	B	A	B	B	A	A	A	-	B	B	A	B	A	A	B	B	A	-	A	B	B	A	B	B
S4_56143576_B	4	56143576	101.165	B	A	B	B	B	B	-	B	B	B	A	B	B	B	A	A	-	A	A	-	B	A	-	A	B	B	A	A	A	-	B	B	A	B	A	A	B	B	A	B	A	B	B	A	B	B
S4_56209730	4	56209730	101.165	B	A	B	B	B	B	-	B	B	B	A	-	B	B	A	A	A	A	A	-	B	A	-	A	B	B	A	A	A	-	B	B	A	B	A	A	B	B	A	-	A	B	B	A	B	B
S4_56232947	4	56232947	101.165	B	A	B	B	B	B	A	B	B	B	A	-	B	B	A	A	A	A	A	-	B	A	B	A	B	B	A	A	A	-	B	B	A	B	A	A	B	B	A	-	A	B	B	A	B	B
S4_56312961	4	56312961	101.165	B	A	B	B	B	B	B	B	B	B	A	-	B	B	A	A	-	A	A	A	B	A	-	A	B	B	A	A	A	-	B	B	A	B	A	A	B	B	A	-	A	B	B	A	B	B
S4_56312996	4	56312996	101.165	B	A	B	B	B	B	B	B	B	B	A	-	B	B	A	A	-	A	A	A	B	A	-	A	B	B	A	A	A	-	B	B	A	B	A	A	B	B	A	-	A	B	B	A	B	B
S4_56331137_B	4	56331137	101.165	B	A	B	B	B	B	-	B	B	B	A	-	B	B	A	A	-	A	A	B	B	A	A	A	B	B	A	A	A	-	B	B	A	B	A	A	B	B	A	-	A	B	B	A	B	B
S4_56143198_B	4	56143198	101.67	B	A	B	B	B	B	A	B	B	B	A	-	B	B	A	A	B	A	A	-	B	A	-	A	B	B	A	A	A	-	B	B	A	B	A	A	B	B	A	-	A	B	B	A	B	B
S4_56143199_B	4	56143199	101.67	B	A	B	B	B	B	A	B	B	B	A	-	B	B	A	A	B	A	A	-	B	A	-	A	B	B	A	A	A	-	B	B	A	B	A	A	B	B	A	-	A	B	B	A	B	B
S4_56143200_B	4	56143200	101.67	B	A	B	B	B	B	A	B	B	B	A	-	B	B	A	A	B	A	A	-	B	A	-	A	B	B	A	A	A	-	B	B	A	B	A	A	B	B	A	-	A	B	B	A	B	B
S4_56381338_B	4	56381338	102.68	B	A	B	B	B	B	-	B	B	B	A	B	B	B	A	A	B	B	A	-	B	A	-	A	B	B	A	A	A	B	B	B	A	B	A	A	B	B	A	-	A	B	B	A	B	B
S4_56424006_B	4	56424006	102.68	B	A	B	B	B	B	-	B	B	B	A	-	B	B	A	A	B	B	A	-	B	A	B	A	B	B	A	A	A	-	B	B	A	B	A	A	B	B	A	-	A	B	B	A	B	B
S4_56611095_B	4	56611095	102.68	B	A	B	B	B	B	-	B	B	B	A	-	B	B	A	A	B	B	A	-	B	A	-	A	B	B	A	A	A	-	B	B	A	B	A	A	B	B	A	-	A	B	B	A	B	B
S4_56615273_B	4	56615273	102.68	B	A	B	B	B	B	B	B	B	B	A	B	B	B	A	A	B	B	A	-	B	A	-	A	B	B	A	A	A	-	B	B	A	B	A	A	B	B	A	-	A	B	B	A	B	B
S4_56655132_B	4	56655132	102.68	B	A	B	B	B	B	-	B	B	B	A	B	B	B	A	A	B	B	A	A	B	A	-	A	B	B	A	A	A	B	B	B	A	B	A	A	B	B	A	B	A	B	B	A	B	B
S4_56672401_B	4	56672401	103.19	B	A	B	B	B	B	-	B	B	B	A	-	B	B	A	A	B	B	A	-	B	-	A	A	B	B	A	A	A	-	B	B	A	B	A	A	B	B	A	-	A	B	B	A	B	B
S4_56754180_B	4	56754180	103.711	B	A	B	B	B	B	A	B	B	B	A	B	B	B	A	A	B	B	A	B	B	B	-	A	B	B	A	A	A	-	B	B	A	B	A	A	B	B	A	B	A	B	B	A	B	B
S4_56873467_B	4	56873467	103.711	B	A	B	B	B	B	-	B	B	B	A	B	B	-	A	A	B	B	A	B	B	B	B	A	B	B	A	A	A	A	B	B	A	B	A	A	B	B	A	B	A	B	B	A	B	B
S4_56873476_B	4	56873476	103.711	B	A	B	B	B	B	-	B	B	B	A	B	B	-	A	A	B	B	A	B	B	B	B	A	B	B	A	A	A	A	B	B	A	B	A	A	B	B	A	B	A	B	B	A	B	B
S4_56873477_B	4	56873477	103.711	B	A	B	B	B	B	-	B	B	B	A	B	B	-	A	A	B	B	A	B	B	B	B	A	B	B	A	A	A	A	B	B	A	B	A	A	B	B	A	B	A	B	B	A	B	B
S4_56873478_B	4	56873478	103.711	B	A	B	B	B	B	-	B	B	B	A	B	B	-	A	A	B	B	A	B	B	B	B	A	B	B	A	A	A	A	B	B	A	B	A	A	B	B	A	B	A	B	B	A	B	B
S4_57115184_B	4	57115184	104.711	-	A	B	B	B	B	-	B	B	B	A	B	B	B	A	A	B	B	A	B	B	B	B	A	B	B	A	A	A	B	B	B	A	B	A	A	B	B	A	B	A	B	B	A	B	B
S4_57115222_B	4	57115222	104.711	-	A	B	B	B	B	-	B	B	B	A	B	B	B	A	A	B	B	A	B	B	B	B	A	B	B	A	A	A	B	B	B	A	B	A	A	B	B	A	B	A	B	B	A	B	B
S4_57179628_B	4	57179628	104.711	-	A	B	B	B	B	-	B	B	B	A	B	B	B	A	A	B	B	A	B	B	B	-	A	B	B	A	A	A	B	B	B	A	B	A	A	B	B	A	B	A	B	B	A	B	B
S4_57228522_B	4	57228522	104.711	-	A	B	B	B	B	-	B	B	B	A	B	B	B	A	A	B	B	A	-	B	B	B	A	B	B	A	A	A	B	B	B	A	B	A	A	B	B	A	B	A	B	B	A	B	B
S4_57229146_B	4	57229146	104.711	-	A	B	B	B	B	-	B	B	B	A	B	B	B	A	A	B	B	-	-	B	B	B	A	B	B	A	A	A	B	B	B	A	B	A	A	B	B	A	B	A	B	B	A	B	B
S4_57229168_B	4	57229168	104.711	-	A	B	B	B	B	-	B	B	B	A	-	B	B	A	A	B	B	-	-	B	B	-	A	B	B	A	A	A	B	B	B	A	B	A	A	B	B	A	B	A	B	B	A	B	B
S4_57340513_B	4	57340513	105.206	-	A	B	B	B	B	-	B	B	B	A	B	B	B	A	A	B	B	-	-	B	B	B	A	B	B	A	A	A	B	B	B	A	B	A	A	B	B	A	B	A	B	A	A	B	B
S4_57407025_B	4	57407025	105.206	-	A	B	B	B	B	B	B	B	B	A	B	B	B	A	A	B	B	-	-	B	B	-	A	B	B	A	A	A	B	B	B	A	B	A	A	B	B	A	B	A	B	A	A	B	B
S4_57410208_B	4	57410208	105.206	-	A	B	B	B	B	A	B	B	B	A	-	B	B	A	A	B	B	B	A	B	B	B	A	B	B	A	A	A	B	B	B	A	B	A	A	B	B	A	B	A	B	A	A	B	B
S4_57410233_B	4	57410233	105.206	-	A	B	B	B	B	A	B	B	B	A	-	B	B	A	A	B	B	B	A	B	B	B	A	B	B	A	A	A	B	B	B	A	B	A	A	B	B	A	B	A	B	A	A	B	B
S4_57410245_B	4	57410245	105.206	-	A	B	B	B	B	A	B	B	B	A	-	B	B	A	A	B	B	B	A	B	B	B	A	B	B	A	A	A	B	B	B	A	B	A	A	B	B	A	B	A	B	A	A	B	B
S4_57410250_B	4	57410250	105.206	-	A	B	B	B	B	A	B	B	B	A	-	B	B	A	A	B	B	B	A	B	B	B	A	B	B	A	A	A	B	B	B	A	B	A	A	B	B	A	B	A	B	A	A	B	B
S4_57188803_B	4	57188803	105.706	B	A	B	B	B	B	A	B	B	B	A	B	B	B	A	A	B	B	B	-	B	B	-	A	B	B	A	A	A	B	B	B	A	B	A	A	B	B	A	B	A	B	B	A	B	B
S4_57239333_B	4	57239333	105.706	-	A	B	B	B	B	-	B	B	B	A	B	B	B	A	A	B	B	-	B	B	B	-	A	B	B	A	A	A	B	B	B	A	B	A	A	B	B	A	B	A	B	B	A	B	B
S4_57287628_B	4	57287628	105.706	-	A	B	B	B	B	-	B	B	B	A	-	B	B	A	A	B	B	B	-	B	B	A	A	B	B	A	A	A	B	B	B	A	B	A	A	B	B	A	B	A	B	B	A	B	B
S4_57099433_B	4	57099433	106.677	B	A	B	B	B	B	A	B	B	B	A	A	B	B	A	A	B	B	A	A	B	B	A	A	B	B	A	A	A	B	B	B	A	B	A	A	B	B	A	B	A	B	B	A	B	B
S4_57179664_B	4	57179664	106.677	-	A	B	B	B	B	-	B	B	B	A	A	B	B	A	A	B	B	A	A	B	B	A	A	B	B	A	A	A	B	B	B	A	B	A	A	B	B	A	B	A	B	B	A	B	B
S4_57252731_B	4	57252731	106.677	-	A	B	B	B	B	-	B	B	B	A	A	B	B	A	A	B	B	-	-	B	B	-	A	B	B	A	A	A	B	B	B	A	B	A	A	B	B	A	B	A	B	B	A	B	B
S4_57611018_B	4	57611018	108.74	-	A	B	B	B	B	-	B	B	B	A	-	B	B	A	A	B	B	-	-	B	B	A	A	B	-	A	A	A	B	B	B	A	B	A	A	B	B	A	B	A	B	A	A	B	B
S4_57611019_B	4	57611019	108.74	-	A	B	B	B	B	-	B	B	B	A	-	B	B	A	A	B	B	-	-	B	B	A	A	B	-	A	A	A	B	B	B	A	B	A	A	B	B	A	B	A	B	A	A	B	B
S4_57611070_B	4	57611070	108.74	-	A	B	B	B	B	-	B	B	B	A	-	B	B	A	A	B	B	-	-	B	B	A	A	B	B	A	A	A	B	B	B	A	B	A	A	B	B	A	B	A	B	A	A	B	B
S4_57611072_B	4	57611072	108.74	-	A	B	B	B	B	-	B	B	B	A	-	B	B	A	A	B	B	-	-	B	B	A	A	B	B	A	A	A	B	B	B	A	B	A	A	B	B	A	B	A	B	A	A	B	B
S4_57673390_B	4	57673390	108.74	-	A	B	B	B	B	-	B	B	B	A	B	B	B	A	A	B	B	-	-	B	B	-	A	B	B	A	A	A	B	B	B	A	B	A	A	B	B	A	B	A	B	A	A	B	B
S4_57761269_B	4	57761269	108.74	-	A	B	B	B	B	-	B	B	B	A	B	B	B	A	A	B	B	-	B	-	B	-	A	B	B	A	A	A	B	B	B	A	B	A	A	B	B	A	B	A	B	A	A	B	B
S4_57808541_B	4	57808541	108.74	-	A	B	B	B	B	-	B	B	B	A	A	B	B	A	A	B	B	A	A	-	B	-	A	B	B	A	A	A	B	B	B	A	B	A	A	B	B	A	B	A	B	A	A	B	B
S4_57808554_B	4	57808554	108.74	-	A	B	B	B	B	B	B	B	B	A	A	B	B	A	A	B	B	A	A	-	B	A	A	B	B	A	A	A	B	B	B	A	B	A	A	B	B	A	B	A	B	A	A	B	B
S4_57832145_B	4	57832145	108.74	-	A	B	B	B	B	-	B	B	B	A	-	B	B	A	A	B	B	A	A	-	B	A	A	B	B	A	A	A	B	B	B	A	B	A	A	B	B	A	B	A	B	A	A	B	B
S4_57834552_B	4	57834552	108.74	-	A	B	B	B	B	-	B	B	B	A	B	B	B	A	A	B	B	A	-	B	B	A	A	B	B	A	A	A	B	B	B	A	B	A	A	B	B	A	B	A	B	A	A	B	B
S4_57866216_B	4	57866216	108.74	A	A	B	B	B	B	-	B	B	B	A	A	B	B	A	A	B	B	A	B	-	B	A	A	B	B	A	A	A	B	B	B	A	B	A	A	B	B	A	B	A	B	A	A	B	B
S4_57875614_B	4	57875614	108.74	-	A	B	B	B	B	-	B	B	B	A	B	B	B	A	A	B	B	A	-	B	B	A	A	B	B	A	A	A	B	B	B	A	B	A	A	B	B	A	B	A	B	A	A	B	B
S4_57876486_B	4	57876486	108.74	-	A	B	B	B	B	-	B	B	B	A	A	B	B	A	A	B	B	A	-	-	B	A	A	B	B	A	A	A	B	B	B	A	B	A	A	B	B	A	B	A	B	A	A	B	B
S4_57879331_B	4	57879331	108.74	-	A	B	B	B	B	-	B	B	B	A	B	B	B	A	A	B	B	A	B	-	B	A	A	B	B	A	A	A	B	B	B	A	B	A	A	B	B	A	B	A	B	A	A	B	B
S4_57916973_B	4	57916973	108.74	-	A	B	B	B	B	A	B	B	B	A	-	B	B	A	A	B	B	A	-	B	B	A	A	B	B	A	A	A	B	B	B	A	B	A	A	B	B	A	B	A	B	A	A	B	B
S4_57916974_B	4	57916974	108.74	-	A	B	B	B	B	A	B	B	B	A	-	B	B	A	A	B	B	A	-	B	B	A	A	B	B	A	A	A	B	B	B	A	B	A	A	B	B	A	B	A	B	A	A	B	B
S4_57919877_B	4	57919877	108.74	-	A	B	B	B	-	-	B	B	B	A	-	B	B	A	A	B	B	A	-	B	B	A	A	B	B	A	A	A	B	B	B	A	B	A	A	B	B	A	B	A	B	A	A	B	B
S4_57920283_B	4	57920283	108.74	-	A	B	B	B	-	-	B	B	B	A	-	B	B	A	A	B	B	A	-	B	B	A	A	B	B	A	A	A	B	B	B	A	B	A	A	B	B	A	B	A	B	A	A	B	B
S4_57943555_B	4	57943555	108.74	-	A	B	B	B	-	-	B	B	B	A	-	B	B	A	A	B	B	A	-	B	B	A	A	B	B	A	A	A	B	B	B	A	B	A	A	B	B	A	B	A	B	A	A	B	B
S4_57943792_B	4	57943792	108.74	-	A	B	B	B	-	-	B	B	B	A	-	B	B	A	A	B	B	A	-	-	B	A	A	B	B	A	A	A	B	B	B	A	B	A	A	B	B	A	B	A	B	A	A	B	B
S4_57943798_B	4	57943798	108.74	-	A	B	B	B	-	-	B	B	B	A	-	B	B	A	A	B	B	A	-	-	B	A	A	B	B	A	A	A	B	B	B	A	B	A	A	B	B	A	B	A	B	A	A	B	B
S4_57959532_B	4	57959532	108.74	B	A	B	B	B	-	B	B	B	B	A	-	B	B	A	A	B	B	A	B	-	B	A	A	B	B	A	A	A	B	B	B	A	B	A	A	B	B	A	B	A	B	A	A	B	B
S4_57959555_B	4	57959555	108.74	B	A	B	B	B	-	B	B	B	B	A	-	B	B	A	A	B	B	A	B	-	B	A	A	B	B	A	A	A	B	B	B	A	B	A	A	B	B	A	B	A	B	A	A	B	B
S4_58073947_B	4	58073947	109.245	-	A	B	B	B	B	B	B	B	B	A	B	B	B	A	A	B	B	A	B	B	B	A	A	B	B	A	A	A	B	B	B	A	B	A	A	B	B	A	B	A	A	A	A	B	B
S4_58083173_B	4	58083173	109.245	-	A	B	B	B	-	-	B	B	B	A	B	B	B	A	A	B	B	A	-	B	B	A	A	B	B	A	A	A	B	B	B	A	B	A	A	B	B	A	B	A	A	A	A	B	B
S4_58125280_B	4	58125280	109.245	-	A	B	B	B	-	-	B	B	B	A	B	B	B	A	A	B	B	A	-	-	B	A	A	B	B	A	A	A	B	B	B	A	B	A	A	B	B	A	B	A	A	A	A	B	B
S4_58225833_B	4	58225833	109.245	B	A	B	B	B	-	-	B	B	B	A	B	B	B	A	A	B	B	A	-	-	B	A	A	B	B	A	A	A	B	B	B	A	B	A	A	B	B	A	B	A	A	A	A	B	B
S4_58228046_B	4	58228046	109.245	-	A	B	B	B	-	B	B	B	B	A	B	B	B	A	A	B	B	A	-	B	B	A	A	B	B	A	A	A	B	B	B	A	B	A	A	B	B	A	B	A	A	A	A	B	B
S4_58074166_B	4	58074166	109.74	-	A	B	B	B	A	B	B	B	B	A	B	B	B	A	A	B	B	A	-	B	B	A	A	B	B	A	A	A	B	B	B	A	B	A	A	B	B	A	B	A	A	A	A	B	B
S4_58138163_B	4	58138163	109.74	A	A	B	B	B	-	-	B	B	B	A	B	B	B	A	A	B	B	A	-	-	B	A	A	B	B	A	A	A	B	B	B	A	B	A	A	B	B	A	B	A	A	A	A	B	B
S4_58246341_B	4	58246341	109.74	B	A	B	B	B	A	B	B	B	B	A	B	B	B	A	A	B	B	A	-	B	B	A	A	B	B	A	A	A	-	B	B	A	B	A	A	B	B	A	B	A	A	A	A	B	B
S4_58270197_B	4	58270197	110.245	-	A	B	B	B	A	-	B	B	B	A	B	B	B	A	A	B	B	A	-	-	B	A	A	B	B	A	A	A	B	B	B	A	B	A	A	B	B	A	B	A	A	A	A	B	B
S4_58292676_B	4	58292676	110.245	-	A	B	B	B	-	-	B	B	B	A	B	B	B	A	A	B	B	A	-	-	B	A	A	B	B	A	A	A	B	B	B	A	B	A	A	B	B	A	B	A	A	A	A	B	B
S4_58292677_B	4	58292677	110.245	-	A	B	B	B	-	-	B	B	B	A	B	B	B	A	A	B	B	A	-	-	B	A	A	B	B	A	A	A	B	B	B	A	B	A	A	B	B	A	B	A	A	A	A	B	B
S4_58436989_B	4	58436989	110.245	-	A	B	B	B	-	-	B	B	B	A	-	B	B	A	A	B	B	A	-	-	B	A	A	B	B	A	A	A	B	B	B	A	B	A	A	B	B	A	B	A	A	A	A	B	B
S4_59529350_B	4	59529350	112.445	B	A	B	B	B	-	B	B	-	B	A	A	B	B	A	A	B	B	A	-	B	B	A	A	B	B	A	A	A	B	A	B	A	B	B	A	B	B	A	B	A	-	A	A	B	B
S4_59597055_B	4	59597055	112.445	-	A	B	B	B	-	B	B	-	B	A	-	B	B	A	A	B	B	A	-	-	B	A	A	B	B	A	A	A	B	A	B	A	B	B	A	B	B	A	B	A	-	A	A	B	B
S4_59621880_B	4	59621880	112.445	-	A	B	B	B	A	B	B	-	B	A	-	-	B	A	A	B	B	A	A	B	B	A	A	B	B	A	A	A	B	A	B	A	B	B	A	B	B	A	B	A	-	A	A	B	B
S4_59754130_B	4	59754130	112.445	B	A	B	B	B	-	B	B	-	B	A	A	B	B	A	A	B	B	A	B	-	B	A	A	B	B	A	A	A	B	A	B	A	B	B	A	B	B	A	B	A	-	A	A	B	B
S4_60357371_B	4	60357371	112.445	-	A	B	B	B	-	B	B	-	B	A	A	B	B	A	A	B	B	A	-	B	B	A	A	B	B	A	A	A	B	A	B	A	B	B	A	-	B	A	B	A	A	A	A	B	B
S4_60430231_B	4	60430231	112.445	B	A	B	B	B	A	-	B	-	B	A	-	B	B	A	A	B	B	A	-	-	B	A	A	B	B	A	A	A	B	A	B	A	B	B	A	-	B	A	B	A	-	A	A	B	B
S4_60437573_B	4	60437573	112.445	-	A	B	B	B	A	B	B	-	B	A	A	B	B	A	A	B	B	A	-	-	B	A	A	B	B	A	A	A	B	A	B	A	B	B	A	-	B	A	B	A	-	A	A	B	B
S4_60659798_B	4	60659798	112.445	-	A	B	B	B	-	-	B	B	B	A	-	B	B	A	A	B	B	A	-	B	B	A	A	B	B	A	A	A	B	A	B	A	B	B	A	-	B	A	B	A	-	A	A	B	B
S4_60659807_B	4	60659807	112.445	-	A	B	B	B	-	-	B	B	B	A	-	B	B	A	A	B	B	A	-	B	B	A	A	B	B	A	A	A	B	A	B	A	B	B	A	-	B	A	B	A	-	A	A	B	B
S4_60665682_B	4	60665682	112.445	-	A	B	B	B	-	-	B	B	B	A	A	B	B	A	A	B	B	A	-	B	B	A	A	B	B	A	A	A	B	A	B	A	B	B	A	B	B	A	B	A	-	A	A	B	B
S4_60665689_B	4	60665689	112.445	-	A	B	B	B	-	-	B	B	B	A	A	B	B	A	A	B	B	A	-	B	B	A	A	B	B	A	A	A	B	A	B	A	B	B	A	B	B	A	B	A	-	A	A	B	B
S4_60714415_B	4	60714415	112.445	-	A	B	B	B	-	-	B	B	B	A	A	B	B	A	A	B	B	A	-	-	B	A	A	B	B	A	A	A	B	A	B	A	B	B	A	-	B	A	B	A	-	A	A	B	B
S4_60714505_B	4	60714505	112.445	-	A	B	B	B	-	-	B	B	B	A	A	B	B	A	A	B	B	A	-	B	B	A	A	B	B	A	A	A	B	A	B	A	B	B	A	A	B	A	B	A	-	A	A	B	B
S4_60742539_B	4	60742539	112.445	-	A	B	B	B	-	B	B	B	B	A	-	B	B	A	A	B	B	A	-	-	B	A	A	B	B	A	A	A	B	A	B	A	B	B	A	-	B	A	B	A	-	A	A	B	B
S4_59544863_B	4	59544863	112.977	-	A	B	B	B	-	B	B	-	B	A	-	B	B	A	A	B	B	A	B	-	B	A	A	B	B	A	A	A	B	A	B	A	B	B	A	B	B	A	B	A	B	A	A	B	B
S4_59552809_B	4	59552809	112.977	-	A	B	B	B	-	-	B	-	B	A	-	B	B	A	A	B	B	A	B	-	B	A	A	B	B	A	A	A	B	A	B	A	B	B	A	B	B	A	B	A	B	A	A	B	B
S4_59690238_B	4	59690238	112.977	B	A	B	B	B	-	B	B	-	B	A	B	B	B	A	A	B	B	A	B	-	B	A	A	B	B	A	A	A	B	A	B	A	B	B	A	B	B	A	B	A	B	A	A	B	B
S4_59690256_B	4	59690256	112.977	B	A	B	B	B	-	B	B	-	B	A	-	B	B	A	A	B	B	A	B	A	B	A	A	B	B	A	A	A	B	A	B	A	B	B	A	B	B	A	B	A	B	A	A	B	B
S4_59690257_B	4	59690257	112.977	B	A	B	B	B	-	B	B	-	B	A	-	B	B	A	A	B	B	A	B	A	B	A	A	B	B	A	A	A	B	A	B	A	B	B	A	B	B	A	B	A	B	A	A	B	B
S4_59690258_B	4	59690258	112.977	B	A	B	B	B	-	B	B	-	B	A	-	B	B	A	A	B	B	A	B	A	B	A	A	B	B	A	A	A	B	A	B	A	B	B	A	B	B	A	B	A	B	A	A	B	B
S4_59690336_B	4	59690336	112.977	-	A	B	B	B	-	-	B	A	B	A	B	B	B	A	A	B	B	A	B	B	B	A	A	B	B	A	A	A	B	A	B	A	B	B	A	B	B	A	B	A	B	A	A	B	B
S4_59786543_B	4	59786543	112.977	B	A	B	B	B	-	-	B	B	B	A	A	B	B	A	A	B	B	A	B	-	B	A	A	B	B	A	A	A	B	A	B	A	B	B	A	B	B	A	B	A	B	A	A	B	B
S4_59787523_B	4	59787523	112.977	-	A	B	B	B	B	B	B	B	B	A	-	B	B	A	A	B	B	A	B	B	B	A	A	B	B	A	A	A	B	A	B	A	B	B	A	B	B	A	B	A	B	A	A	B	B
S4_59787531_B	4	59787531	112.977	-	A	B	B	B	-	-	B	-	B	A	-	B	B	A	A	B	B	A	B	B	B	A	A	B	B	A	A	A	B	A	B	A	B	B	A	B	B	A	B	A	B	A	A	B	B
S4_59803176_B	4	59803176	112.977	-	A	B	B	B	-	B	B	-	B	A	-	B	B	A	A	B	B	A	-	-	B	A	A	B	B	A	A	A	B	A	B	A	B	B	A	B	B	A	B	A	B	A	A	B	B
S4_59803202_B	4	59803202	112.977	-	A	B	B	B	-	B	B	-	B	A	-	B	B	A	A	B	B	A	-	-	B	A	A	B	B	A	A	A	B	A	B	A	B	B	A	B	B	A	B	A	B	A	A	B	B
S4_60134605_B	4	60134605	112.977	-	A	B	B	B	-	B	B	B	B	A	-	B	B	A	A	B	B	A	-	B	B	A	A	B	B	A	A	A	B	A	B	A	B	B	A	B	B	A	B	A	B	A	A	B	B
S4_60151106_B	4	60151106	112.977	-	A	B	B	B	A	B	B	B	B	A	-	B	B	A	A	B	B	A	B	-	B	A	A	B	B	A	A	A	B	A	B	A	B	B	A	B	B	A	B	A	B	A	A	B	B
S4_60234455_B	4	60234455	112.977	-	A	B	B	B	-	-	B	-	B	A	-	B	B	A	A	B	B	A	B	-	B	A	A	B	B	A	A	A	B	A	B	A	B	B	A	-	B	A	B	A	B	A	A	B	B
S4_60503414_B	4	60503414	112.977	-	A	B	B	B	-	-	B	B	B	A	A	B	B	A	A	B	B	A	-	-	B	A	A	B	B	A	A	A	B	A	B	A	B	B	A	-	B	A	B	A	B	A	A	B	B
S4_60538566_B	4	60538566	112.977	-	A	B	B	B	A	B	B	B	B	A	-	B	B	A	A	B	B	A	B	B	B	A	A	B	B	A	A	A	B	A	B	A	B	B	A	-	B	A	B	A	B	A	A	B	B
S4_60574261_B	4	60574261	112.977	B	A	B	B	B	-	B	B	B	B	A	A	B	B	A	A	B	B	A	B	B	B	A	A	B	B	A	A	A	B	A	B	A	B	B	A	-	B	A	B	A	B	A	A	B	B
S4_60574262_B	4	60574262	112.977	B	A	B	B	B	-	B	B	B	B	A	A	B	B	A	A	B	B	A	B	B	B	A	A	B	B	A	A	A	B	A	B	A	B	B	A	-	B	A	B	A	B	A	A	B	B
S4_60574263_B	4	60574263	112.977	B	A	B	B	B	-	B	B	B	B	A	A	B	B	A	A	B	B	A	-	B	B	A	A	B	B	A	A	A	B	A	B	A	B	B	A	-	B	A	B	A	B	A	A	B	B
S4_60574273_B	4	60574273	112.977	B	A	B	B	B	-	B	B	B	B	A	A	B	B	A	A	B	B	A	B	B	B	A	A	B	B	A	A	A	B	A	B	A	B	B	A	-	B	A	B	A	B	A	A	B	B
S4_60743201_B	4	60743201	112.977	-	A	B	B	B	A	B	B	B	B	A	B	B	B	A	A	B	B	A	-	B	B	A	A	B	B	A	A	A	B	A	B	A	B	B	A	B	B	A	B	A	B	A	A	B	B
S4_60747930_B	4	60747930	112.977	-	A	B	B	B	-	-	B	B	B	A	A	B	B	A	A	B	B	A	-	-	B	A	A	B	B	A	A	A	B	A	B	A	B	B	A	-	B	A	B	A	B	A	A	B	B
S4_60747991_B	4	60747991	112.977	-	A	B	B	B	-	B	B	B	B	A	A	B	B	A	A	B	B	A	B	B	B	A	A	B	B	A	A	A	B	A	B	A	B	B	A	-	B	A	B	A	B	A	A	B	B
S4_60289756_B	4	60289756	113.503	A	A	B	B	B	-	A	B	A	B	A	-	B	B	A	A	B	B	A	B	-	B	A	A	B	B	A	A	A	B	A	B	A	B	B	A	B	B	A	B	A	B	A	A	B	B
S4_60289757_B	4	60289757	113.503	A	A	B	B	B	-	A	B	A	B	A	-	B	B	A	A	B	B	A	B	-	B	A	A	B	B	A	A	A	B	A	B	A	B	B	A	B	B	A	B	A	B	A	A	B	B
S4_60289758_B	4	60289758	113.503	A	A	B	B	B	-	A	B	A	B	A	-	B	B	A	A	B	B	A	B	-	B	A	A	B	B	A	A	A	B	A	B	A	B	B	A	B	B	A	B	A	B	A	A	B	B
S4_60474647_B	4	60474647	114.035	-	A	B	B	B	B	B	B	-	B	A	-	B	B	A	A	B	B	A	-	B	B	A	A	B	B	A	A	A	B	A	B	A	B	B	A	-	B	A	B	A	B	A	A	B	B
S4_60660952_B	4	60660952	114.556	-	A	B	B	B	-	-	B	B	B	A	-	B	B	A	A	B	B	A	A	-	B	A	A	B	B	A	A	A	B	A	B	A	B	B	A	B	B	A	B	A	B	A	A	B	B
S4_60660958_B	4	60660958	114.556	-	A	B	B	B	-	-	B	B	B	A	-	B	B	A	A	B	B	A	A	-	B	A	A	B	B	A	A	A	B	A	B	A	B	B	A	B	B	A	B	A	B	A	A	B	B
S4_60766873_B	4	60766873	115.061	-	A	B	B	B	-	-	B	B	B	A	-	B	B	A	A	B	B	A	-	-	B	A	A	B	B	A	A	A	B	A	A	A	B	B	A	B	B	A	B	A	B	A	A	B	B
S4_60766885_B	4	60766885	115.061	-	A	B	B	B	-	-	B	B	B	A	-	B	B	A	A	B	B	A	-	-	B	A	A	B	B	A	A	A	B	A	A	A	B	B	A	B	B	A	B	A	B	A	A	B	B
S4_60766887_B	4	60766887	115.061	-	A	B	B	B	-	-	B	B	B	A	-	B	B	A	A	B	B	A	-	-	B	A	A	B	B	A	A	A	B	A	A	A	B	B	A	B	B	A	B	A	B	A	A	B	B
S4_60766898_B	4	60766898	115.061	-	A	B	B	B	-	-	B	B	B	A	-	B	B	A	A	B	B	A	-	-	B	A	A	B	B	A	A	A	B	A	A	A	B	B	A	B	B	A	B	A	B	A	A	B	B
S4_60811298_B	4	60811298	115.061	B	A	B	B	B	-	B	B	B	B	A	A	B	B	A	A	B	B	A	A	-	B	A	A	B	B	A	A	A	B	A	A	A	B	B	A	-	B	A	B	A	B	A	A	B	B
S4_60811299_B	4	60811299	115.061	B	A	B	B	B	-	B	B	B	B	A	A	B	B	A	A	B	B	A	A	-	B	A	A	B	B	A	A	A	B	A	A	A	B	B	A	-	B	A	B	A	B	A	A	B	B
S4_60811300_B	4	60811300	115.061	B	A	B	B	B	-	B	B	B	B	A	A	B	B	A	A	B	B	A	A	-	B	A	A	B	B	A	A	A	B	A	A	A	B	B	A	-	B	A	B	A	B	A	A	B	B
S4_60979638_B	4	60979638	116.64	-	A	B	B	B	-	-	B	B	B	A	B	B	B	A	A	B	B	A	-	-	B	A	A	B	B	A	A	A	B	A	A	A	B	B	B	B	B	A	B	A	B	A	A	B	B
S4_61079048_B	4	61079048	116.64	-	A	B	B	B	B	-	B	B	B	A	-	B	B	A	A	B	B	A	-	-	B	A	A	B	B	A	A	A	B	A	A	A	B	B	B	-	B	A	B	A	B	A	A	B	B
S4_61207835_B	4	61207835	116.64	B	A	B	B	B	B	B	B	B	B	A	-	B	B	A	A	B	B	A	A	A	B	A	A	B	B	A	A	A	B	A	A	A	B	B	B	-	B	A	B	A	B	A	A	B	B
S4_61207866_B	4	61207866	116.64	B	A	B	B	B	B	B	B	B	B	A	-	B	B	A	A	B	B	A	A	A	B	A	A	B	B	A	A	A	B	A	A	A	B	B	B	-	B	A	B	A	B	A	A	B	B
S4_61207878_B	4	61207878	116.64	B	A	B	B	B	B	B	B	B	B	A	-	B	B	A	A	B	B	A	A	A	B	A	A	B	B	A	A	A	B	A	A	A	B	B	B	-	B	A	B	A	B	A	A	B	B
S4_61278102_B	4	61278102	116.64	-	A	B	B	B	B	B	B	B	B	A	B	B	B	A	A	B	B	A	-	A	B	A	A	B	B	A	A	A	B	A	A	A	B	B	B	B	B	A	B	A	B	A	A	B	B
S4_61403773_B	4	61403773	116.64	-	A	B	B	B	-	-	B	B	B	A	-	B	B	A	A	B	B	A	-	B	B	A	A	B	B	A	A	A	B	A	A	A	B	B	B	-	B	A	B	A	B	A	A	B	B
S4_61062173_B	4	61062173	117.167	-	A	B	B	B	-	B	B	B	B	A	A	B	B	A	A	B	B	A	B	B	B	A	A	B	B	A	A	A	B	A	A	A	B	B	B	B	B	A	B	A	-	A	A	B	B
S4_61062174_B	4	61062174	117.167	-	A	B	B	B	-	B	B	B	B	A	A	B	B	A	A	B	B	A	B	B	B	A	A	B	B	A	A	A	B	A	A	A	B	B	B	B	B	A	B	A	-	A	A	B	B
S4_61068088_B	4	61068088	117.167	-	A	B	B	B	B	-	B	B	B	A	-	B	B	A	A	B	B	A	B	B	B	A	A	B	B	A	A	A	B	A	A	A	B	B	B	-	B	A	B	A	-	A	A	B	B
S4_61204129_B	4	61204129	117.167	B	A	B	B	B	B	-	B	B	B	A	A	B	B	A	A	B	B	A	B	-	B	A	A	B	B	A	A	A	B	A	A	-	B	B	B	-	B	A	B	A	-	A	A	B	B
S4_61212597_B	4	61212597	117.167	-	A	B	B	B	B	-	B	B	B	A	A	B	B	A	A	B	B	A	B	-	B	A	A	B	B	A	A	A	B	A	A	A	B	B	B	-	B	A	B	A	-	A	A	B	B
S4_61290400_B	4	61290400	117.167	-	A	B	B	B	B	-	B	B	B	A	-	B	B	A	A	B	B	A	-	-	B	A	A	B	B	A	A	A	B	A	A	A	B	B	B	-	B	A	B	A	B	A	A	B	B
S4_61191532_B	4	61191532	117.682	-	A	B	B	B	B	-	B	B	B	A	A	B	B	A	A	B	B	A	B	-	B	A	A	B	B	A	A	A	B	A	A	A	B	B	B	-	B	A	B	A	B	A	A	B	B
S4_61224887_B	4	61224887	117.682	-	A	B	B	B	B	-	B	B	B	A	A	B	B	A	A	B	B	A	-	B	B	A	A	B	B	A	A	A	B	A	A	A	B	B	B	A	B	A	B	A	-	A	A	B	B
S4_61224888_B	4	61224888	117.682	-	A	B	B	B	B	-	B	B	B	A	A	B	B	A	A	B	B	A	-	B	B	A	A	B	B	A	A	A	B	A	A	A	B	B	B	A	B	A	B	A	-	A	A	B	B
S4_61466847_B	4	61466847	119.789	-	A	B	B	B	-	B	B	B	B	A	A	B	B	A	A	B	B	A	-	-	B	A	A	A	A	A	A	A	B	A	A	A	B	B	B	-	B	A	B	A	B	A	A	B	B
S4_61489096_B	4	61489096	119.789	-	A	B	B	B	B	B	B	B	B	A	A	B	B	A	A	B	B	A	-	-	B	A	A	A	A	A	A	A	B	A	A	A	B	B	B	-	B	A	B	A	-	A	A	B	B
S4_61597110_B	4	61597110	119.789	-	A	B	B	B	B	B	B	B	B	A	A	B	B	A	A	B	B	A	-	A	B	A	A	A	A	A	A	A	B	A	A	A	B	B	B	-	B	A	B	A	B	A	A	B	B
S4_61633266_B	4	61633266	119.789	-	A	B	B	B	-	-	B	B	B	A	A	B	B	A	A	B	B	A	-	-	B	A	A	A	A	A	A	A	B	A	A	A	B	B	B	-	B	A	B	-	B	A	A	B	B
S4_61700071_B	4	61700071	121.402	B	A	B	B	B	B	B	B	B	B	A	B	B	B	A	A	B	B	A	-	-	B	-	A	A	A	A	A	A	B	A	A	A	B	B	B	-	B	A	B	A	A	A	A	B	B
S4_61700186_B	4	61700186	121.402	B	A	B	B	B	-	-	B	B	B	A	-	B	B	A	A	B	B	A	B	-	B	-	A	A	A	A	A	A	B	A	A	A	B	B	B	-	B	A	B	A	-	A	A	B	B
S4_61700873_B	4	61700873	121.402	-	A	B	B	B	-	B	B	B	B	A	A	B	B	A	A	B	B	A	-	-	B	A	A	A	A	A	A	A	B	A	A	A	B	B	B	B	B	A	B	A	-	A	A	B	B
S4_61700918_B	4	61700918	121.402	-	A	B	B	B	-	-	B	B	B	A	A	B	B	A	A	B	B	A	-	B	B	-	A	A	A	A	A	A	B	A	A	A	B	B	B	B	B	A	B	A	A	A	A	B	B
S4_61772300_B	4	61772300	121.402	B	A	B	B	B	B	A	B	B	B	A	B	B	B	A	A	B	B	A	B	-	B	A	A	A	A	A	A	A	B	A	A	A	B	B	B	B	B	A	B	A	-	A	A	B	B
S4_62049676_B	4	62049676	121.402	-	A	B	B	B	-	B	B	B	B	A	B	B	B	A	A	B	B	A	-	B	B	B	A	A	A	A	A	A	B	A	A	A	B	B	B	B	B	A	B	A	-	A	A	B	B
S4_62103540_B	4	62103540	121.402	-	A	B	B	B	A	-	B	B	B	A	A	B	B	A	A	B	B	A	B	A	B	A	A	A	A	A	A	A	B	A	A	A	B	B	B	-	B	A	B	A	-	A	A	B	B
S4_62023024	4	62023024	121.934	-	A	B	B	B	-	B	B	B	B	A	A	B	B	A	A	B	B	A	-	-	B	-	A	A	A	A	A	A	B	A	A	A	B	B	B	-	B	A	B	A	-	A	A	B	B
S4_62023039	4	62023039	121.934	-	A	B	B	B	-	B	B	B	B	A	A	B	B	A	A	B	B	A	-	-	B	-	A	A	A	A	A	A	B	A	A	A	B	B	B	-	B	A	B	A	-	A	A	B	B
S4_62103157	4	62103157	121.934	-	A	B	B	B	B	B	B	B	B	A	A	B	B	A	A	B	B	A	-	A	B	A	A	A	A	A	A	A	B	A	A	A	B	B	B	-	B	A	B	A	-	A	A	B	B
S4_62132259_B	4	62132259	121.934	A	A	B	B	B	B	B	B	B	B	A	-	B	B	A	A	B	B	A	B	A	B	A	A	A	A	A	A	A	B	A	A	A	B	B	B	B	B	A	B	A	-	A	A	B	B
S4_62171786_B	4	62171786	121.934	B	A	B	B	B	-	-	B	B	B	A	A	B	B	A	A	B	B	A	-	A	B	B	A	A	A	A	A	A	B	A	A	A	B	B	B	-	B	A	B	A	B	A	A	B	B
S4_62331880	4	62331880	122.998	A	A	B	B	B	-	-	B	B	B	A	A	B	B	A	A	B	B	A	A	-	B	A	A	A	A	A	A	A	B	A	A	A	B	B	B	-	B	A	B	A	B	A	A	B	B
S4_62331882	4	62331882	122.998	A	A	B	B	B	-	-	B	B	B	A	A	B	B	A	A	B	B	A	A	-	B	A	A	A	A	A	A	A	B	A	A	A	B	B	B	-	B	A	B	A	B	A	A	B	B
S4_62360004	4	62360004	122.998	-	A	B	B	B	-	B	B	B	B	A	A	B	B	A	A	B	B	A	A	-	B	A	A	A	A	A	A	A	B	A	A	A	B	B	B	A	B	A	B	A	-	A	A	B	B
S4_62311604	4	62311604	124.611	-	A	B	B	B	B	B	B	B	B	A	B	B	B	A	A	B	B	A	-	A	B	B	A	A	A	A	A	A	B	A	A	A	B	B	B	-	B	A	B	A	A	A	A	B	B
S4_62428749_B	4	62428749	124.611	B	A	B	B	B	-	B	B	B	B	A	B	B	B	A	A	B	B	A	-	-	B	B	A	A	A	A	A	A	B	A	A	A	B	B	B	-	B	A	B	A	A	A	A	B	B
S4_62428759_B	4	62428759	124.611	B	A	B	B	B	-	B	B	B	B	A	B	B	B	A	A	B	B	A	-	-	B	B	A	A	A	A	A	A	B	A	A	A	B	B	B	-	B	A	B	A	A	A	A	B	B
S4_62660384	4	62660384	126.787	-	A	B	B	B	B	-	B	A	B	A	B	B	B	A	A	B	B	A	A	A	B	A	A	A	A	A	A	A	B	A	A	A	B	B	B	-	B	A	B	A	-	A	A	B	B
S4_62832956	4	62832956	126.787	B	A	B	B	B	B	-	B	A	B	A	B	B	B	A	A	B	B	-	A	A	B	-	A	A	A	A	A	A	B	A	A	A	B	B	B	-	B	A	B	A	A	A	A	B	B
S4_62873440_B	4	62873440	126.787	B	A	B	B	B	B	-	B	A	B	A	B	B	B	A	A	B	B	-	-	-	B	-	A	A	A	A	A	A	B	A	A	A	B	B	B	-	B	A	B	A	B	A	A	B	B
S4_63012990	4	63012990	126.787	B	A	B	B	B	-	B	B	A	B	A	B	B	B	A	A	B	B	-	-	A	B	A	A	A	A	A	A	A	B	A	A	A	B	B	B	-	B	A	B	A	B	A	A	B	-
S4_62936040	4	62936040	127.297	-	A	B	B	B	B	-	B	A	B	A	B	B	B	A	A	B	B	A	-	B	B	A	A	A	A	A	A	A	B	A	A	A	B	B	B	-	B	A	B	A	A	A	A	B	B
S4_62936061	4	62936061	127.297	-	A	B	B	B	B	-	B	A	B	A	B	B	B	A	A	B	B	A	-	B	B	A	A	A	A	A	A	A	B	A	A	A	B	B	B	-	B	A	B	A	A	A	A	B	B
S4_62936063	4	62936063	127.297	-	A	B	B	B	B	-	B	A	B	A	B	B	B	A	A	B	B	A	-	B	B	A	A	A	A	A	A	A	B	A	A	A	B	B	B	-	B	A	B	A	A	A	A	B	B
S4_63082392_B	4	63082392	128.893	-	A	A	B	B	-	B	B	A	B	A	B	B	B	A	A	B	B	-	-	B	B	-	A	A	A	A	A	A	B	A	A	A	B	B	B	A	B	A	B	A	B	A	A	B	B
S4_63129292_B	4	63129292	128.893	B	A	A	B	B	-	B	B	A	B	A	B	B	B	A	A	B	B	-	-	B	B	A	A	A	A	A	A	A	B	A	A	A	B	B	B	-	B	A	B	A	B	A	A	B	-
S4_63170220	4	63170220	128.893	-	A	A	B	B	-	-	B	A	B	A	B	B	B	A	A	B	B	A	A	-	B	-	A	A	A	A	A	A	B	A	A	A	B	B	B	A	B	A	B	A	B	A	A	B	-
S4_63184028	4	63184028	129.42	-	A	A	B	B	A	-	B	A	B	A	B	B	B	A	A	B	B	A	-	B	B	-	A	A	A	A	A	A	B	A	A	A	B	B	B	-	B	A	B	A	B	A	A	B	-
S4_63202100_B	4	63202100	129.42	-	A	A	B	B	-	B	B	A	B	A	B	B	B	A	A	B	B	A	A	B	B	B	A	A	A	A	A	A	B	A	A	A	B	B	B	-	B	A	B	A	B	A	A	B	A
S4_63203835_B	4	63203835	129.42	B	A	A	B	B	-	B	B	A	B	A	B	B	B	A	A	B	B	-	A	-	B	-	A	A	A	A	A	A	B	A	A	A	B	B	B	-	B	A	B	A	B	A	A	B	-
S4_63348056_B	4	63348056	129.42	B	A	A	B	B	-	B	B	A	B	A	B	B	B	A	A	B	B	A	A	B	B	-	A	A	A	A	A	A	B	A	A	A	B	B	B	-	B	A	B	A	B	A	A	B	-
S4_63531648	4	63531648	131.643	B	A	A	B	B	-	-	B	A	B	A	B	B	B	A	A	B	B	-	A	-	B	A	A	A	A	A	A	A	B	A	A	A	A	B	B	B	B	A	B	A	B	A	A	B	-
S4_63531649	4	63531649	131.643	B	A	A	B	B	-	-	B	A	B	A	B	B	B	A	A	B	B	-	A	-	B	A	A	A	A	A	A	A	B	A	A	A	A	B	B	B	B	A	B	A	B	A	A	B	-
S4_63531652	4	63531652	131.643	B	A	A	B	B	-	-	B	A	B	A	B	B	B	A	A	B	B	-	A	-	B	A	A	A	A	A	A	A	B	A	A	A	A	B	B	B	B	A	B	A	B	A	A	B	-
S4_63531653	4	63531653	131.643	B	A	A	B	B	-	-	B	A	B	A	B	B	B	A	A	B	B	-	A	-	B	A	A	A	A	A	A	A	B	A	A	A	A	B	B	B	B	A	B	A	B	A	A	B	-
S4_63798003_B	4	63798003	131.643	B	A	A	B	B	-	-	B	A	B	A	B	B	B	A	-	B	B	-	A	B	B	A	A	A	A	A	A	A	B	A	A	A	A	B	B	B	B	A	B	A	B	A	A	B	B
S4_63798037_B	4	63798037	131.643	B	A	A	B	B	-	-	B	A	B	A	B	B	B	A	-	B	B	-	A	B	B	A	A	A	A	A	A	A	B	A	A	A	A	B	B	B	B	A	B	A	B	A	A	B	B
S4_63788767_B	4	63788767	132.696	B	A	A	B	B	B	B	B	A	B	A	B	B	B	A	B	B	B	A	A	B	B	-	A	A	A	A	A	A	B	A	A	A	A	B	B	B	B	A	B	A	B	A	A	B	-
S4_63858174_B	4	63858174	132.696	B	A	A	B	B	B	-	B	A	B	A	B	B	B	A	B	B	B	A	A	-	B	B	A	A	A	A	A	A	B	A	A	A	A	B	B	B	B	A	B	A	B	A	A	B	-
S4_63858201_B	4	63858201	132.696	B	A	A	B	B	B	-	B	A	B	A	B	B	B	A	B	B	B	A	A	-	B	B	A	A	A	A	A	A	B	A	A	A	A	B	B	B	B	A	B	A	B	A	A	B	-
S4_63907675_B	4	63907675	132.696	B	A	A	B	B	B	-	B	A	B	A	B	B	B	A	B	B	B	A	A	B	B	B	A	A	A	A	A	A	B	A	A	A	A	B	B	B	B	A	B	A	B	A	A	B	-
S4_63932234_B	4	63932234	132.696	B	A	A	B	B	-	-	B	A	B	A	B	B	B	A	B	B	B	-	A	-	B	B	A	A	A	A	A	A	B	A	A	A	A	B	B	B	B	A	B	A	B	A	A	B	B
S4_63965907_B	4	63965907	132.696	B	A	A	B	B	B	-	B	A	B	A	B	B	B	A	B	B	B	-	-	B	B	B	A	A	A	A	A	A	B	A	A	A	A	B	B	B	B	A	B	A	B	A	A	B	-
S4_63858125_B	4	63858125	133.212	B	A	A	B	-	-	B	B	A	B	A	B	B	B	A	B	B	B	B	A	B	B	B	A	A	A	A	A	A	B	A	A	A	A	B	B	B	B	A	B	A	B	A	A	B	B
S4_63858126_B	4	63858126	133.212	B	A	A	B	-	-	B	B	A	B	A	B	B	B	A	B	B	B	B	A	B	B	B	A	A	A	A	A	A	B	A	A	A	A	B	B	B	B	A	B	A	B	A	A	B	B
S4_63858127_B	4	63858127	133.212	B	A	A	B	-	-	B	B	A	B	A	B	B	B	A	B	B	B	B	A	B	B	B	A	A	A	A	A	A	B	A	A	A	A	B	B	B	B	A	B	A	B	A	A	B	B
S4_64064241_B	4	64064241	133.738	B	A	A	B	B	B	B	B	A	B	A	B	B	B	A	B	B	B	-	-	B	B	B	A	A	A	A	A	A	B	A	A	A	A	B	B	B	B	A	B	A	B	A	A	B	-
S4_64064251_B	4	64064251	133.738	B	A	A	B	B	B	B	B	A	B	A	B	B	B	A	B	B	B	-	-	B	B	B	A	A	A	A	A	A	B	A	A	A	A	B	B	B	B	A	B	A	B	A	A	B	-
S4_64064267_B	4	64064267	133.738	B	A	A	B	B	B	B	B	A	B	A	B	B	B	A	B	B	B	-	-	B	B	B	A	A	A	A	A	A	B	A	A	A	A	B	B	B	B	A	B	A	B	A	A	B	-
S4_64064269_B	4	64064269	133.738	B	A	A	B	B	B	B	B	A	B	A	B	B	B	A	B	B	B	-	-	B	B	B	A	A	A	A	A	A	B	A	A	A	A	B	B	B	B	A	B	A	B	A	A	B	-
S4_64418179_B	4	64418179	134.259	B	A	A	B	B	B	B	B	A	B	A	B	B	B	A	B	B	B	-	A	B	B	B	A	A	A	A	A	A	B	A	A	A	A	B	B	B	B	A	B	A	B	A	A	B	A
S4_64463099_B	4	64463099	134.259	B	A	A	B	B	-	B	B	A	B	A	B	B	B	A	B	B	B	A	A	A	B	B	A	A	A	A	A	A	B	A	A	A	A	B	B	B	B	A	B	A	B	A	A	B	B
S4_64477961_B	4	64477961	134.259	B	A	A	B	B	B	B	B	A	B	A	B	B	B	A	B	B	B	-	A	-	B	B	A	A	A	A	A	A	B	A	A	A	A	B	B	B	B	A	B	A	B	A	A	B	-
S4_64535100_B	4	64535100	134.259	B	A	A	B	B	B	B	B	A	B	A	B	B	B	A	B	B	B	A	A	A	B	B	A	A	A	A	A	A	B	A	A	A	A	B	B	B	B	A	B	A	B	A	A	B	B
S4_64540720_B	4	64540720	134.259	B	A	A	B	B	-	B	B	A	B	A	B	B	B	A	B	B	B	A	-	A	B	B	A	A	A	A	A	A	B	A	A	A	A	B	B	B	B	A	B	A	B	A	A	B	B
S4_64417977_B	4	64417977	134.759	B	A	A	B	B	-	B	B	A	B	A	B	B	B	A	B	B	B	A	A	B	B	B	A	A	A	A	A	A	B	A	A	A	A	B	B	B	B	A	B	A	B	A	A	B	-
S4_64509157_B	4	64509157	134.759	B	A	A	B	B	B	B	B	A	B	A	B	B	B	A	B	B	B	-	A	B	B	B	A	A	A	A	A	A	B	A	A	A	A	B	B	B	B	A	B	A	B	A	A	B	-
S4_64509182_B	4	64509182	134.759	B	A	A	B	B	B	B	B	A	B	A	B	B	B	A	B	B	B	-	A	B	B	B	A	A	A	A	A	A	B	A	A	A	A	B	B	B	B	A	B	A	B	A	A	B	-
S4_64509183_B	4	64509183	134.759	B	A	A	B	B	B	B	B	A	B	A	B	B	B	A	B	B	B	-	A	B	B	B	A	A	A	A	A	A	B	A	A	A	A	B	B	B	B	A	B	A	B	A	A	B	-
S4_64517867_B	4	64517867	134.759	B	A	A	B	B	B	B	B	A	B	A	B	B	B	A	B	B	B	-	A	B	B	B	A	A	A	A	A	A	B	A	A	A	A	B	B	B	B	A	B	A	B	A	A	B	-
S4_64530681_B	4	64530681	135.254	B	A	A	B	B	B	B	B	A	B	A	B	B	B	A	B	B	B	B	A	-	B	B	A	A	A	A	A	A	B	A	A	A	A	B	B	B	B	A	B	A	B	A	A	B	B
S4_64530682_B	4	64530682	135.254	B	A	A	B	B	B	B	B	A	B	A	B	B	B	A	B	B	B	B	A	-	B	B	A	A	A	A	A	A	B	A	A	A	A	B	B	B	B	A	B	A	B	A	A	B	B
S4_64530683_B	4	64530683	135.254	B	A	A	B	B	B	B	B	A	B	A	B	B	B	A	B	B	B	B	A	-	B	B	A	A	A	A	A	A	B	A	A	A	A	B	B	B	B	A	B	A	B	A	A	B	B
S4_64530684_B	4	64530684	135.254	B	A	A	B	B	B	B	B	A	B	A	B	B	B	A	B	B	B	B	A	-	B	B	A	A	A	A	A	A	B	A	A	A	A	B	B	B	B	A	B	A	B	A	A	B	B
S4_65047131_B	4	65047131	136.244	B	A	A	B	B	A	B	B	A	B	A	B	B	B	A	B	B	B	-	A	A	B	B	A	A	A	A	A	A	B	A	A	A	A	B	B	B	B	A	B	A	B	A	A	B	B
S4_65055801_B	4	65055801	136.244	B	A	A	B	B	A	B	B	A	B	A	B	B	B	A	B	B	B	B	A	-	B	B	A	A	A	A	A	A	B	A	A	A	A	B	B	B	B	A	B	A	B	A	A	B	B
S4_65072918_B	4	65072918	136.244	B	A	A	B	B	A	B	B	A	B	A	B	B	B	A	B	B	B	B	A	-	B	B	A	A	A	A	A	A	B	A	A	A	A	B	B	B	B	A	B	A	B	A	A	B	B
S4_65072941_B	4	65072941	136.244	B	A	A	B	B	A	B	B	A	B	A	B	B	B	A	B	B	B	B	A	-	B	B	A	A	A	A	A	A	B	A	A	A	A	B	B	B	B	A	B	A	B	A	A	B	B
S4_66042654_B	4	66042654	139.406	B	A	A	A	B	A	B	B	A	B	A	B	B	B	A	B	B	B	-	A	B	B	B	A	A	A	A	A	A	B	A	A	A	A	-	B	B	B	A	B	A	A	A	A	A	B
S4_66102772_B	4	66102772	139.406	B	A	A	A	B	A	B	B	A	B	A	B	B	B	A	B	B	B	-	A	B	B	B	A	A	A	A	A	A	B	A	A	A	A	B	B	B	B	A	B	A	A	A	A	A	B
S4_66102798_B	4	66102798	139.406	B	A	A	A	B	A	B	B	A	B	A	B	B	B	A	B	B	B	-	A	B	B	B	A	A	A	A	A	A	B	A	A	A	A	B	B	B	B	A	B	A	A	A	A	A	B
S4_66105538	4	66105538	139.406	B	A	A	A	B	A	B	B	A	B	A	B	B	B	A	B	B	B	-	A	-	B	B	A	A	A	A	A	A	B	A	A	A	A	-	B	B	B	A	B	A	A	A	A	A	B
S4_66105539	4	66105539	139.406	B	A	A	A	B	A	B	B	A	B	A	B	B	B	A	B	B	B	-	A	-	B	B	A	A	A	A	A	A	B	A	A	A	A	-	B	B	B	A	B	A	A	A	A	A	B
S4_66105540	4	66105540	139.406	B	A	A	A	B	A	B	B	A	B	A	B	B	B	A	B	B	B	-	A	-	B	B	A	A	A	A	A	A	B	A	A	A	A	-	B	B	B	A	B	A	A	A	A	A	B
S4_66105541	4	66105541	139.406	B	A	A	A	B	A	B	B	A	B	A	B	B	B	A	B	B	B	-	A	-	B	B	A	A	A	A	A	A	B	A	A	A	A	-	B	B	B	A	B	A	A	A	A	A	B
S4_66204568_B	4	66204568	140.437	B	A	A	A	B	A	B	B	A	B	A	B	B	B	A	B	B	B	-	A	-	B	B	A	A	A	A	A	A	B	A	A	A	A	-	A	B	B	A	B	A	A	A	A	A	B
S4_66306689	4	66306689	140.437	B	A	A	A	B	A	B	B	A	B	A	B	B	B	A	B	B	B	-	A	-	B	B	A	A	A	A	A	A	B	A	A	A	A	B	A	B	B	A	B	A	A	A	A	A	-
S4_66317948_B	4	66317948	140.437	B	A	A	A	B	A	B	B	A	B	A	B	B	B	A	B	B	B	-	A	-	B	B	A	A	A	A	A	A	B	A	A	A	A	B	A	B	B	A	B	A	A	A	A	A	B
S4_66317949_B	4	66317949	140.437	B	A	A	A	B	A	B	B	A	B	A	B	B	B	A	B	B	B	-	A	-	B	B	A	A	A	A	A	A	B	A	A	A	A	B	A	B	B	A	B	A	A	A	A	A	B
S4_66317954	4	66317954	140.437	B	A	A	A	B	A	B	B	A	B	A	B	B	B	A	B	B	B	-	A	-	B	B	A	A	A	A	A	A	B	A	A	A	A	B	A	B	B	A	B	A	A	A	A	A	B
S4_66325840_B	4	66325840	140.437	B	A	A	A	B	A	B	B	A	B	A	B	B	B	A	B	B	B	-	-	B	B	B	A	A	A	A	A	A	B	A	A	A	A	-	A	B	B	A	B	A	A	A	A	A	B
S4_66329632	4	66329632	140.437	B	A	A	A	B	A	B	B	A	B	A	B	B	B	A	B	B	B	A	A	-	B	B	A	A	A	A	A	A	B	A	A	A	A	-	A	B	B	A	B	A	A	A	A	A	B
S4_66332437	4	66332437	140.437	B	A	A	A	B	A	B	B	A	B	A	B	B	B	A	B	B	B	-	A	A	B	B	A	A	A	A	A	A	B	A	A	A	A	-	A	B	B	A	B	A	A	A	A	A	B
S4_66383560	4	66383560	140.437	B	A	A	A	B	A	B	B	A	B	A	B	B	B	A	B	B	B	-	A	-	B	B	A	A	A	A	A	A	B	A	A	A	A	-	A	B	B	A	B	A	A	A	A	A	B
S4_67083059	4	67083059	142.034	B	A	A	A	B	A	B	B	A	B	A	B	B	B	A	B	B	B	-	A	-	B	B	A	A	A	A	A	A	B	A	A	A	A	-	A	B	B	B	B	A	A	A	A	A	B
S4_67084076	4	67084076	142.034	B	A	A	A	B	A	B	B	A	B	A	B	B	B	A	B	B	B	-	A	-	B	B	A	A	A	A	A	A	B	A	A	A	A	-	A	B	B	B	B	A	A	A	A	A	B
S4_67084137	4	67084137	142.034	B	A	A	A	B	A	B	B	A	B	A	B	B	B	A	B	B	B	-	A	B	B	B	A	A	A	A	A	A	B	A	A	A	A	-	A	B	B	B	B	A	A	A	A	A	B
S4_67081509	4	67081509	142.544	B	A	A	A	B	A	B	B	A	B	A	B	B	B	A	B	B	B	-	A	-	B	B	A	A	A	A	A	A	B	A	A	A	A	-	A	B	B	B	B	A	A	A	A	A	B
S4_67266961	4	67266961	142.544	B	A	A	A	B	A	B	B	A	B	A	B	B	B	A	B	-	B	-	A	-	B	B	A	A	A	A	A	A	B	A	A	A	A	-	A	B	B	B	B	A	A	A	A	A	B
S4_67826859	4	67826859	145.809	B	A	A	A	B	A	B	B	A	B	A	B	B	B	A	B	B	B	A	A	-	B	B	A	A	A	A	A	-	B	A	A	B	A	-	A	B	B	A	B	A	A	A	A	A	B
S4_67826876	4	67826876	145.809	B	A	A	A	B	A	B	B	A	B	A	B	B	B	A	B	B	B	A	A	-	B	B	A	A	A	A	A	-	B	A	A	B	A	-	A	B	B	A	B	A	A	A	A	A	B
S4_67826877	4	67826877	145.809	B	A	A	A	B	A	B	B	A	B	A	B	B	B	A	B	B	B	A	A	-	B	B	A	A	A	A	A	-	B	A	A	B	A	-	A	B	B	A	B	A	A	A	A	A	B
S4_67833764	4	67833764	145.809	B	A	A	A	B	A	B	B	A	B	A	B	B	B	A	B	B	B	A	A	A	B	B	A	A	A	A	A	A	B	A	A	B	A	-	A	B	B	A	B	A	A	A	A	A	B
S4_67833814	4	67833814	145.809	B	A	A	A	B	A	B	B	A	B	A	B	B	B	A	B	B	B	A	A	A	B	B	A	A	A	A	A	A	B	A	A	B	A	-	A	B	B	A	B	A	A	A	A	A	B
S4_67834791	4	67834791	145.809	B	A	A	A	B	A	B	B	A	B	A	B	B	B	A	B	B	B	A	A	B	B	B	A	A	A	A	A	A	B	A	A	B	A	-	A	B	B	A	B	A	A	A	A	A	B
S4_67849333	4	67849333	145.809	B	A	A	A	B	A	B	B	A	B	A	B	B	B	A	B	B	B	A	A	B	B	B	A	A	A	A	A	A	B	A	A	B	A	-	A	B	B	A	B	A	A	A	A	A	B
S4_68215225	4	68215225	147.894	B	A	A	A	B	A	B	B	A	B	A	B	B	B	A	B	B	B	A	A	-	B	B	A	A	A	A	A	-	B	A	A	B	A	B	A	B	B	A	B	A	A	A	A	A	A
S4_68537796	4	68537796	147.894	B	A	A	A	B	-	B	B	A	B	A	B	B	B	A	B	B	B	A	A	-	B	B	A	A	A	A	A	A	B	A	A	B	A	B	A	B	B	A	B	A	A	A	A	A	A
S4_68537813	4	68537813	147.894	B	A	A	A	B	-	B	B	A	B	A	B	B	B	A	B	B	B	A	A	-	B	B	A	A	A	A	A	A	B	A	A	B	A	B	A	B	B	A	B	A	A	A	A	A	A
S4_68537826	4	68537826	147.894	B	A	A	A	B	-	B	B	A	B	A	B	B	B	A	B	B	B	A	A	-	B	B	A	A	A	A	A	A	B	A	A	B	A	B	A	B	B	A	B	A	A	A	A	A	A
S4_68537827	4	68537827	147.894	B	A	A	A	B	-	B	B	A	B	A	B	B	B	A	B	B	B	A	A	-	B	B	A	A	A	A	A	A	B	A	A	B	A	B	A	B	B	A	B	A	A	A	A	A	A
S5_203037	5	203037	0	A	B	A	A	B	A	A	A	B	B	B	A	A	A	-	A	A	-	A	B	B	B	B	B	B	B	A	A	B	A	A	A	A	A	B	A	B	A	A	B	B	B	B	A	A	A
S5_203038	5	203038	0	A	B	A	A	B	A	A	A	B	B	B	A	A	A	-	A	A	-	A	B	B	B	B	B	B	B	A	A	B	A	A	A	A	A	B	A	B	A	A	B	B	B	B	A	A	A
S5_203041	5	203041	0	A	B	A	A	B	A	A	A	B	B	B	A	A	A	-	A	A	-	A	B	B	B	B	B	B	B	A	A	B	A	A	A	A	A	B	A	B	A	A	B	B	B	B	A	A	A
S5_636334	5	636334	3.653	A	B	A	A	B	-	A	A	B	B	B	A	A	A	-	A	B	B	A	B	B	B	B	B	B	B	A	B	B	A	A	A	A	A	A	A	B	A	A	B	B	A	B	A	A	A
S5_636335	5	636335	3.653	A	B	A	A	B	-	A	A	B	B	B	A	A	A	-	A	B	B	A	B	B	B	B	B	B	B	A	B	B	A	A	A	A	A	A	A	B	A	A	B	B	A	B	A	A	A
S5_636336	5	636336	3.653	A	B	A	A	B	-	A	A	B	B	B	A	A	A	-	A	B	B	A	B	B	B	B	B	B	B	A	B	B	A	A	A	A	A	A	A	B	A	A	B	B	A	B	A	A	A
S5_665446	5	665446	3.653	A	B	A	A	B	-	A	A	B	B	B	A	A	A	-	A	B	B	A	B	B	B	B	B	B	B	A	B	B	A	A	A	A	A	A	A	B	A	A	B	B	A	B	A	A	A
S5_665447	5	665447	3.653	A	B	A	A	B	-	A	A	B	B	B	A	A	A	-	A	B	B	A	B	B	B	B	B	B	B	A	B	B	A	A	A	A	A	A	A	B	A	A	B	B	A	B	A	A	A
S5_665448	5	665448	3.653	A	B	A	A	B	-	A	A	B	B	B	A	A	A	-	A	B	B	A	B	B	B	B	B	B	B	A	B	B	A	A	A	A	A	A	A	B	A	A	B	B	A	B	A	A	A
S5_1683525	5	1683525	5.716	A	B	A	A	B	A	A	-	B	B	B	A	A	A	B	A	B	B	A	B	B	B	B	B	B	B	A	B	B	A	A	A	A	A	A	A	B	A	A	B	A	A	B	A	A	A
S5_1729947	5	1729947	5.716	A	B	A	A	B	A	A	B	B	B	B	A	A	A	B	A	B	B	A	B	B	B	B	B	B	B	A	B	B	A	A	A	A	A	A	A	B	A	A	B	A	A	B	A	A	A
S5_1836514	5	1836514	5.716	A	B	A	A	B	-	A	A	B	B	B	A	A	A	B	A	B	B	A	B	B	B	B	B	B	B	A	B	B	A	A	A	A	A	A	A	B	A	A	B	A	A	B	A	A	A
S5_1722802	5	1722802	6.206	A	B	A	A	B	A	A	-	B	B	B	A	A	A	B	A	B	B	A	B	B	B	B	B	B	B	A	A	B	A	A	A	A	A	A	A	B	A	A	B	A	A	B	A	A	A
S5_1722803	5	1722803	6.206	A	B	A	A	B	A	A	-	B	B	B	A	A	A	B	A	B	B	A	B	B	B	B	B	B	B	A	A	B	A	A	A	A	A	A	A	B	A	A	B	A	A	B	A	A	A
S5_1729055	5	1729055	6.206	A	B	A	A	B	-	A	B	B	B	B	A	A	A	B	A	B	B	A	B	B	B	B	B	B	B	A	A	B	A	A	A	A	A	A	A	B	A	A	B	A	A	B	A	A	A
S5_1729058	5	1729058	6.206	A	B	A	A	B	-	A	B	B	B	B	A	A	A	B	A	B	B	A	B	B	B	B	B	B	B	A	A	B	A	A	A	A	A	A	A	B	A	A	B	A	A	B	A	A	A
S5_1729103	5	1729103	6.206	A	B	A	A	B	-	A	B	B	B	B	A	A	A	B	A	B	B	A	B	B	B	B	B	B	B	A	A	B	A	A	A	A	A	A	A	B	A	A	B	A	A	-	A	A	A
S5_1729982	5	1729982	6.206	A	B	A	A	B	A	A	B	B	B	B	A	A	A	B	A	B	B	A	B	B	B	B	B	B	B	A	A	B	A	A	A	A	A	A	A	B	A	A	B	A	A	B	A	A	A
S5_1730027	5	1730027	6.206	A	B	A	A	B	A	A	B	B	B	B	A	A	A	B	A	B	B	A	B	B	B	B	B	B	B	A	A	B	A	A	A	A	A	A	A	B	A	A	B	A	A	B	A	A	A
S5_1730071	5	1730071	6.696	A	B	A	A	B	A	A	-	B	B	B	A	A	A	B	A	B	B	A	B	B	B	B	B	B	B	A	-	B	A	A	A	A	A	A	A	B	A	A	B	A	A	B	A	A	A
S5_1730227	5	1730227	6.696	A	B	A	A	B	-	A	-	B	B	B	A	A	A	B	A	B	B	A	B	B	B	B	B	B	B	A	A	B	A	A	A	A	A	A	A	B	A	A	B	A	A	B	A	A	A
S5_1730229	5	1730229	6.696	A	B	A	A	B	-	A	-	B	B	B	A	A	A	B	A	B	B	A	B	B	B	B	B	B	B	A	A	B	A	A	A	A	A	A	A	B	A	A	B	A	A	B	A	A	A
S5_1740605	5	1740605	6.696	A	B	A	A	B	A	A	-	B	B	B	A	A	A	B	A	B	B	A	B	B	B	B	B	B	B	A	A	B	A	A	A	A	A	A	A	B	A	A	B	A	A	B	A	A	A
S5_1836095	5	1836095	6.696	A	B	A	A	B	-	A	A	B	B	B	A	A	A	B	A	B	B	A	B	B	B	B	B	B	B	A	A	B	A	A	A	A	A	A	A	B	A	A	B	A	A	B	A	A	A
S5_1836125	5	1836125	6.696	A	B	A	A	B	-	A	A	B	B	B	A	A	A	B	A	B	B	A	B	B	B	B	B	B	B	A	A	B	A	A	A	A	A	A	A	B	A	A	B	A	A	B	A	A	A
S5_2155288	5	2155288	9.249	A	B	A	A	B	A	A	A	B	B	B	A	A	A	B	A	B	B	A	B	B	B	B	B	A	A	A	A	B	A	A	A	A	A	A	A	B	A	A	A	A	A	B	A	A	A
S5_2155296	5	2155296	9.249	A	B	A	A	B	A	A	A	B	B	B	A	A	A	B	A	B	B	A	B	B	B	B	B	A	A	A	A	B	A	A	A	A	A	A	A	B	A	A	A	A	A	B	A	A	A
S5_2155325	5	2155325	9.249	A	B	A	A	B	A	A	A	B	B	B	A	A	A	B	A	B	B	A	B	B	B	B	B	A	A	A	A	B	A	A	A	A	A	A	A	B	A	A	A	A	A	B	A	A	A
S5_2196165	5	2196165	9.249	A	B	A	A	B	A	-	-	B	B	B	A	A	A	B	A	B	B	A	B	B	B	B	B	A	A	A	-	B	A	A	A	A	A	A	A	B	A	A	A	A	A	B	A	A	A
S5_2454070	5	2454070	11.803	A	B	A	A	B	A	A	-	B	B	B	A	A	A	B	A	B	B	A	B	B	B	B	B	A	A	A	A	B	A	B	A	A	A	A	-	B	A	A	A	A	A	A	A	A	A
S5_2541595	5	2541595	11.803	A	B	A	A	B	A	A	-	B	B	B	A	A	A	B	A	B	B	A	B	B	B	B	B	A	A	A	A	B	A	B	A	A	A	A	-	B	A	A	A	A	A	A	A	A	A
S5_2547496	5	2547496	11.803	A	B	A	A	B	A	A	-	B	B	B	A	A	A	B	A	B	B	A	B	B	B	B	B	A	A	A	A	B	A	B	A	A	A	A	-	B	A	A	A	A	A	A	A	A	A
S5_3485451	5	3485451	17.81	-	B	A	B	B	B	A	A	B	B	B	A	A	A	B	B	B	B	A	B	B	B	B	B	A	A	A	A	B	B	B	A	A	A	A	-	B	B	A	A	A	A	A	A	A	A
S5_3485453	5	3485453	17.81	-	B	A	B	B	B	A	A	B	B	B	A	A	A	B	B	B	B	A	B	B	B	B	B	A	A	A	A	B	B	B	A	A	A	A	-	B	B	A	A	A	A	A	A	A	A
S5_3485454	5	3485454	17.81	-	B	A	B	B	B	A	A	B	B	B	A	A	A	B	B	B	B	A	B	B	B	B	B	A	A	A	A	B	B	B	A	A	A	A	-	B	B	A	A	A	A	A	A	A	A
S5_3485455	5	3485455	17.81	-	B	A	B	B	B	A	A	B	B	B	A	A	A	B	B	B	B	A	B	B	B	B	B	A	A	A	A	B	B	B	A	A	A	A	-	B	B	A	A	A	A	A	A	A	A
S5_3633465	5	3633465	18.81	-	B	A	B	B	-	A	-	B	B	B	A	A	A	B	B	B	B	A	B	B	B	B	B	A	A	A	A	B	B	B	A	A	A	A	-	B	B	A	A	A	A	A	A	A	A
S5_3709839	5	3709839	18.81	B	B	A	B	B	-	A	A	B	B	B	A	A	A	B	B	B	B	A	B	B	B	B	B	A	A	A	A	B	B	B	A	A	A	A	-	B	B	A	A	A	A	A	A	A	A
S5_3572441_B	5	3572441	19.32	-	B	A	B	B	-	A	-	B	B	B	A	A	A	B	B	B	B	A	B	B	B	B	B	A	A	A	B	B	B	B	A	A	A	A	-	B	B	A	A	A	A	A	A	A	A
S5_3588067_B	5	3588067	19.32	-	B	A	B	B	B	A	A	B	B	B	A	A	A	B	B	B	B	A	B	B	B	B	B	A	A	A	A	B	B	B	A	A	A	A	-	B	B	A	A	A	A	A	A	A	A
S5_3588083_B	5	3588083	19.32	-	B	A	B	B	B	A	A	B	B	B	A	A	A	B	B	B	B	A	B	B	B	B	B	A	A	A	A	B	B	B	A	A	A	A	-	B	B	A	A	A	A	A	A	A	A
S5_3603994_B	5	3603994	19.32	B	B	A	B	B	B	A	A	B	B	B	A	A	A	B	B	B	B	A	B	B	B	B	B	A	A	A	A	B	B	B	A	A	A	A	-	B	B	A	A	A	A	A	A	A	A
S5_3603996_B	5	3603996	19.32	B	B	A	B	B	B	A	A	B	B	B	A	A	A	B	B	B	B	A	B	B	B	B	B	A	A	A	A	B	B	B	A	A	A	A	-	B	B	A	A	A	A	A	A	A	A
S5_3603997_B	5	3603997	19.32	B	B	A	B	B	B	A	A	B	B	B	A	A	A	B	B	B	B	A	B	B	B	B	B	A	A	A	A	B	B	B	A	A	A	A	-	B	B	A	A	A	A	A	A	A	A
S5_3603998_B	5	3603998	19.32	B	B	A	B	B	B	A	A	B	B	B	A	A	A	B	B	B	B	A	B	B	B	B	B	A	A	A	A	B	B	B	A	A	A	A	-	B	B	A	A	A	A	A	A	A	A
S5_3604052_B	5	3604052	19.32	B	B	A	B	B	B	A	A	B	B	B	A	A	A	B	B	B	B	A	B	B	B	B	B	A	A	A	A	B	B	B	A	A	A	A	-	B	B	A	A	A	A	A	A	A	A
S5_3645309_B	5	3645309	19.32	-	B	A	B	B	-	A	-	B	B	B	A	A	A	B	B	B	B	A	B	B	B	B	B	A	A	A	-	B	B	B	A	A	A	A	-	B	B	A	A	A	A	A	A	A	A
S5_3710817_B	5	3710817	19.32	B	B	A	B	B	B	A	A	B	B	B	A	A	A	B	B	B	B	A	B	B	B	B	B	A	A	A	A	B	B	B	A	A	A	A	B	B	B	A	A	A	A	A	A	A	A
S5_3710831_B	5	3710831	19.32	B	B	A	B	B	B	A	A	B	B	B	A	A	A	B	B	B	B	A	B	B	B	B	B	A	A	A	A	B	B	B	A	A	A	A	B	B	B	A	A	A	A	A	A	A	A
S5_3710833_B	5	3710833	19.32	B	B	A	B	B	B	A	A	B	B	B	A	A	A	B	B	B	B	A	B	B	B	B	B	A	A	A	A	B	B	B	A	A	A	A	B	B	B	A	A	A	A	A	A	A	A
S5_3505132_B	5	3505132	19.841	B	B	A	B	B	B	A	-	B	B	B	A	A	A	B	B	B	B	A	B	B	B	B	B	A	A	A	-	B	B	B	A	A	A	A	B	B	B	A	A	A	A	A	A	A	A
S5_3514121_B	5	3514121	19.841	B	B	A	B	B	B	A	-	B	B	B	A	A	A	B	B	B	B	A	B	B	B	B	B	A	A	A	B	B	B	B	A	A	A	A	-	B	B	A	A	A	A	A	A	A	A
S5_3514122_B	5	3514122	19.841	B	B	A	B	B	B	A	-	B	B	B	A	A	A	B	B	B	B	A	B	B	B	B	B	A	A	A	B	B	B	B	A	A	A	A	-	B	B	A	A	A	A	A	A	A	A
S5_3584452_B	5	3584452	19.841	B	B	A	B	B	B	A	-	B	B	B	A	A	A	B	B	B	-	A	B	B	B	B	B	A	A	A	B	B	B	B	A	A	A	A	-	B	B	A	A	A	A	A	A	A	A
S5_3534730_B	5	3534730	20.336	B	B	A	B	B	B	A	A	B	B	B	A	A	A	B	B	B	B	A	B	B	B	B	B	A	A	A	A	B	B	B	A	A	A	A	A	B	B	A	A	A	A	A	A	A	A
S5_3534738_B	5	3534738	20.336	B	B	A	B	B	B	A	A	B	B	B	A	A	A	B	B	B	B	A	B	B	B	B	B	A	A	A	A	B	B	B	A	A	A	A	A	B	B	A	A	A	A	A	A	A	A
S5_3586898_B	5	3586898	20.336	B	B	A	B	B	B	A	A	B	B	B	A	A	A	B	B	B	B	A	B	B	B	B	B	A	A	A	A	B	B	B	A	A	A	A	-	B	B	A	A	A	A	A	A	A	A
S5_3586899_B	5	3586899	20.831	B	B	A	B	B	B	A	A	B	B	B	A	A	A	B	B	B	B	A	B	B	B	B	B	A	A	A	A	B	B	B	A	A	A	A	-	B	B	A	A	A	A	A	A	A	A
S5_3657830_B	5	3657830	20.831	B	B	A	B	B	B	A	A	B	B	B	A	A	A	B	B	B	B	A	B	B	B	B	B	A	A	A	A	B	B	B	A	A	A	A	-	B	B	A	A	A	A	A	A	A	A
S5_3657876_B	5	3657876	20.831	B	B	A	B	B	-	A	A	B	B	B	A	A	A	B	B	B	B	A	B	B	B	B	B	A	A	A	-	B	B	B	A	A	A	A	-	B	B	A	A	A	A	A	A	A	A
S5_3657926_B	5	3657926	20.831	B	B	A	B	B	-	A	A	B	B	B	A	A	A	B	B	B	B	A	B	B	B	B	B	A	A	A	-	B	B	B	A	A	A	A	-	B	B	A	A	A	A	A	A	A	A
S5_3641140_B	5	3641140	21.321	B	B	A	B	B	B	A	A	B	B	B	A	A	A	B	B	B	B	A	B	B	B	B	B	A	A	A	A	B	B	B	A	A	A	A	-	B	B	A	A	A	A	A	A	A	A
S5_3641173_B	5	3641173	21.321	B	B	A	B	B	B	A	A	B	B	B	A	A	A	B	B	B	B	A	B	B	B	B	B	A	A	A	A	B	B	B	A	A	A	A	-	B	B	A	A	A	A	A	A	A	A
S5_4200442_B	5	4200442	26.282	-	A	A	B	B	B	-	-	B	B	B	A	A	A	B	B	B	B	A	B	B	B	B	B	A	A	A	-	B	B	B	A	A	A	A	B	B	B	-	A	A	A	A	A	B	B
S5_4200448_B	5	4200448	26.282	-	A	A	B	B	B	-	-	B	B	B	A	A	A	B	B	B	B	A	B	B	B	B	B	A	A	A	-	B	B	B	A	A	A	A	B	B	B	-	A	A	A	A	A	B	B
S5_4275165_B	5	4275165	26.282	-	A	A	B	B	-	-	-	B	B	B	A	A	A	B	B	B	B	A	B	B	B	B	B	A	A	A	B	B	B	B	A	A	A	A	B	B	B	-	A	A	A	A	A	-	B
S5_4711135_B	5	4711135	28.889	A	A	A	B	B	B	-	-	B	B	B	A	A	A	B	B	B	B	A	B	B	B	B	B	A	A	A	-	B	B	B	A	A	A	A	B	B	B	-	A	A	A	A	A	B	B
S5_4712756	5	4712756	28.889	A	A	A	B	B	-	-	-	B	B	B	A	A	A	B	B	B	B	A	B	B	B	B	B	A	A	A	-	B	B	B	A	A	A	A	B	B	B	-	A	A	A	A	A	B	B
S5_4757830	5	4757830	28.889	A	A	A	B	B	-	A	-	B	B	B	A	A	A	B	B	B	B	A	B	B	B	B	B	A	A	A	A	B	B	B	A	A	A	A	B	B	B	A	A	A	A	A	A	B	B
S5_4925977_B	5	4925977	30.405	A	A	A	B	B	B	A	A	B	B	B	A	B	B	B	B	B	B	A	B	B	B	B	B	A	A	A	-	B	B	B	A	A	A	A	B	B	B	-	A	A	A	A	A	B	B
S5_4926003_B	5	4926003	30.405	A	A	A	B	B	B	A	A	B	B	B	A	B	B	B	B	B	B	A	B	B	B	B	B	A	A	A	-	B	B	B	A	A	A	A	B	B	B	-	A	A	A	A	A	B	B
S5_4926004_B	5	4926004	30.405	A	A	A	B	B	B	A	A	B	B	B	A	B	B	B	B	B	B	A	B	B	B	B	B	A	A	A	-	B	B	B	A	A	A	A	B	B	B	-	A	A	A	A	A	B	B
S5_4926005_B	5	4926005	30.405	A	A	A	B	B	B	A	A	B	B	B	A	B	B	B	B	B	B	A	B	B	B	B	B	A	A	A	-	B	B	B	A	A	A	A	B	B	B	-	A	A	A	A	A	B	B
S5_5315397_B	5	5315397	32.489	-	A	A	B	B	-	-	A	B	B	B	A	B	B	B	B	B	B	A	B	B	B	B	B	A	A	A	B	B	B	B	A	A	A	A	A	B	B	-	A	A	A	A	A	-	B
S5_5336729_B	5	5336729	32.489	B	A	A	B	B	-	B	A	B	B	B	A	B	B	B	B	B	B	A	B	B	B	B	B	A	A	A	B	B	B	B	A	A	A	A	A	B	B	-	A	A	A	A	A	B	B
S5_5336794_B	5	5336794	32.489	B	A	A	B	B	B	-	-	B	B	B	A	B	B	B	B	B	B	A	B	B	B	B	B	A	A	A	B	B	B	B	A	A	A	A	A	B	B	-	A	A	A	A	A	B	B
S5_5313155_B	5	5313155	33.52	A	A	A	B	B	-	-	B	B	B	B	A	B	B	B	B	B	B	A	B	B	B	B	B	A	A	A	A	B	B	B	A	A	A	A	A	B	B	A	A	A	A	A	A	B	B
S5_5315615_B	5	5315615	33.52	A	A	A	B	B	-	-	-	B	B	B	A	B	B	B	B	B	B	A	B	B	B	B	B	A	A	A	-	B	B	B	A	A	A	A	A	B	B	-	A	A	A	A	A	B	B
S5_5315649_B	5	5315649	33.52	A	A	A	B	B	-	-	-	B	B	B	A	B	B	B	B	B	B	A	B	B	B	B	B	A	A	A	-	B	B	B	A	A	A	A	A	B	B	-	A	A	A	A	A	B	B
S5_5693169	5	5693169	35.583	B	A	A	B	B	-	-	A	B	B	B	A	B	B	B	B	B	B	A	B	B	B	B	B	A	A	A	A	B	B	B	A	A	A	A	A	B	B	-	A	A	A	A	A	-	B
S5_5693170	5	5693170	35.583	B	A	A	B	B	-	-	A	B	B	B	A	B	B	B	B	B	B	A	B	B	B	B	B	A	A	A	A	B	B	B	A	A	A	A	A	B	B	-	A	A	A	A	A	-	B
S5_5693171	5	5693171	35.583	B	A	A	B	B	-	-	A	B	B	B	A	B	B	B	B	B	B	A	B	B	B	B	B	A	A	A	A	B	B	B	A	A	A	A	A	B	B	-	A	A	A	A	A	-	B
S5_5703050	5	5703050	36.088	B	A	A	B	B	-	A	A	B	B	B	A	B	B	B	B	B	B	A	B	B	B	B	B	A	A	A	A	B	B	B	A	A	A	A	A	B	B	-	A	A	A	A	A	-	B
S5_5703090	5	5703090	36.088	B	A	A	B	B	-	A	A	B	B	B	A	B	B	B	B	B	B	A	B	B	B	B	B	A	A	A	A	B	B	B	A	A	A	A	A	B	B	-	A	A	A	A	A	-	B
S5_5703101	5	5703101	36.088	B	A	A	B	B	-	A	A	B	B	B	A	B	B	B	B	B	B	A	B	B	B	B	B	A	A	A	A	B	B	B	A	A	A	A	A	B	B	-	A	A	A	A	A	-	B
S5_5715372_B	5	5715372	36.088	B	A	A	B	B	-	-	-	B	B	B	A	B	B	B	B	B	B	A	B	B	B	B	B	A	A	A	A	B	B	B	A	A	A	A	A	B	B	A	A	A	A	A	A	-	B
S5_5715408_B	5	5715408	36.088	B	A	A	B	B	A	-	-	B	B	B	A	B	B	B	B	B	B	A	B	B	B	B	B	A	A	A	A	B	B	B	A	A	A	A	A	B	B	-	A	A	A	A	A	-	B
S5_5837604_B	5	5837604	37.109	B	A	A	B	B	-	-	A	B	B	B	A	B	B	B	B	B	B	A	B	B	B	B	B	A	A	A	A	B	B	B	A	A	A	A	A	B	B	A	A	A	A	A	B	B	B
S5_5820090_B	5	5820090	37.604	B	A	A	B	B	-	B	B	B	B	B	A	B	B	B	B	B	B	A	B	B	B	B	B	A	A	A	A	B	B	B	A	-	A	A	A	B	B	-	A	A	A	A	B	B	B
S5_5820172_B	5	5820172	37.604	B	A	A	B	B	-	-	B	B	B	B	A	B	B	B	B	B	B	A	B	B	B	B	B	A	A	A	A	B	B	B	A	A	A	A	A	B	B	-	A	A	A	A	B	B	B
S5_5751849_B	5	5751849	38.104	B	A	A	B	B	A	B	-	B	B	B	A	B	B	B	B	B	B	A	B	B	B	B	B	A	A	A	-	B	B	B	A	A	A	A	A	B	B	A	A	A	A	A	B	B	B
S5_5887237_B	5	5887237	38.104	B	A	A	B	B	-	B	A	B	B	B	A	B	B	B	B	B	B	A	B	B	B	B	B	A	A	A	-	B	B	B	A	A	A	A	A	B	B	-	A	A	A	A	B	B	B
S5_6052607_B	5	6052607	38.104	B	A	A	B	B	-	-	-	B	B	B	A	B	B	B	B	B	B	A	B	B	B	B	B	A	A	A	-	B	B	B	A	A	A	A	A	B	B	A	A	A	A	-	B	B	B
S5_6065161_B	5	6065161	38.104	B	A	A	B	B	-	-	-	B	B	B	A	B	B	B	B	B	B	A	B	B	B	B	B	A	A	A	-	B	B	B	A	A	A	A	A	B	B	A	A	A	A	-	B	B	B
S5_6065162_B	5	6065162	38.104	B	A	A	B	B	-	-	-	B	B	B	A	B	B	B	B	B	B	A	B	B	B	B	B	A	A	A	-	B	B	B	A	A	A	A	A	B	B	A	A	A	A	-	B	B	B
S5_6065163_B	5	6065163	38.104	B	A	A	B	B	-	-	-	B	B	B	A	B	B	B	B	B	B	A	B	B	B	B	B	A	A	A	-	B	B	B	A	A	A	A	A	B	B	A	A	A	A	-	B	B	B
S5_6065164_B	5	6065164	38.104	B	A	A	B	B	-	-	-	B	B	B	A	B	B	B	B	B	B	A	B	B	B	B	B	A	A	A	-	B	B	B	A	A	A	A	A	B	B	A	A	A	A	-	B	B	B
S5_6065398_B	5	6065398	38.104	B	A	A	B	B	-	-	-	B	B	B	A	B	B	B	B	B	B	A	B	B	B	B	B	A	A	A	B	B	B	B	A	A	A	A	A	B	B	A	A	A	A	A	B	B	B
S5_6065434_B	5	6065434	38.104	B	A	A	B	B	-	-	-	B	B	B	A	B	B	B	B	B	B	A	B	B	B	B	B	A	A	A	B	B	B	B	A	A	A	A	A	B	B	A	A	A	A	A	B	B	B
S5_6086177_B	5	6086177	38.104	B	A	A	B	B	A	-	B	B	B	B	A	B	B	B	B	B	B	A	B	B	B	B	B	A	A	A	B	B	B	B	A	A	A	A	A	B	B	A	A	A	A	A	B	B	B
S5_6420025_B	5	6420025	41.233	B	A	A	B	B	B	-	B	B	B	B	A	B	B	B	B	B	B	A	B	B	B	B	B	A	A	A	A	B	B	B	A	A	A	A	A	B	B	A	A	A	A	A	B	B	B
S5_6420026_B	5	6420026	41.233	B	A	A	B	B	B	-	B	B	B	B	A	B	B	B	B	B	B	A	B	B	B	B	B	A	A	A	A	B	B	B	A	A	A	A	A	B	B	A	A	A	A	A	B	B	B
S5_6420027_B	5	6420027	41.233	B	A	A	B	B	B	-	B	B	B	B	A	B	B	B	B	B	B	A	B	B	B	B	B	A	A	A	A	B	B	B	A	A	A	A	A	B	B	A	A	A	A	A	B	B	B
S5_6800551_B	5	6800551	41.233	B	A	A	B	B	B	-	B	B	B	B	A	B	B	B	B	B	B	A	B	B	B	B	B	A	A	A	A	B	B	B	A	A	A	A	A	B	B	-	A	A	A	A	B	B	B
S5_7018941_B	5	7018941	42.812	B	B	A	A	B	-	A	B	B	B	B	A	B	B	B	B	B	B	A	B	B	B	B	B	A	A	A	-	B	B	B	A	A	A	A	A	B	B	A	A	A	A	A	B	B	B
S5_7030996_B	5	7030996	42.812	B	B	A	A	B	-	-	B	B	B	B	A	B	B	B	B	B	B	A	B	B	B	B	B	A	A	A	B	B	B	B	A	A	A	A	A	B	B	A	A	A	A	A	B	B	B
S5_7031007_B	5	7031007	42.812	B	B	A	A	B	-	-	B	B	B	B	A	B	B	B	B	B	B	A	B	B	B	B	B	A	A	A	A	B	B	B	A	A	A	A	A	B	B	A	A	A	A	A	B	B	B
S5_7031052_B	5	7031052	42.812	B	B	A	A	B	-	-	B	B	B	B	A	B	B	B	B	B	B	A	B	B	B	B	B	A	A	A	A	B	B	B	A	A	A	A	A	B	B	-	A	A	A	A	B	B	B
S5_7077326_B	5	7077326	42.812	B	B	A	A	B	-	-	B	B	B	B	A	B	B	B	B	B	B	A	B	B	B	B	B	A	A	A	A	B	B	B	A	A	A	A	A	B	B	-	A	A	A	A	B	B	B
S5_8655283_B	5	8655283	46.666	B	B	B	A	B	B	A	B	A	B	A	A	B	B	B	B	B	B	A	B	B	A	B	B	A	A	A	A	B	B	B	A	A	B	A	A	B	B	B	A	A	A	A	B	B	B
S5_8655284_B	5	8655284	46.666	B	B	B	A	B	B	A	B	A	B	A	A	B	B	B	B	B	B	A	B	B	A	B	B	A	A	A	A	B	B	B	A	A	B	A	A	B	B	B	A	A	A	A	B	B	B
S5_8875487_B	5	8875487	46.666	B	B	B	A	B	-	A	B	A	B	A	A	B	B	B	B	B	B	A	B	B	A	B	B	A	A	A	A	B	B	B	A	A	B	A	A	B	B	B	A	A	A	A	B	B	B
S5_8994776_B	5	8994776	46.666	B	B	B	A	B	-	-	B	A	B	A	A	B	B	B	B	B	B	A	B	B	A	B	B	A	A	A	-	B	B	B	A	A	B	A	A	B	B	B	A	A	A	A	B	B	B
S5_8830726_B	5	8830726	47.161	B	B	B	A	B	A	-	B	A	B	A	A	B	B	B	B	B	B	A	B	B	A	B	B	A	A	A	A	B	B	B	A	A	B	A	A	B	B	B	A	A	A	A	B	B	B
S5_8830759_B	5	8830759	47.161	B	B	B	A	B	A	-	B	A	B	A	A	B	B	B	B	B	B	A	B	B	A	B	B	A	A	A	A	B	B	B	A	A	B	A	A	B	B	B	A	A	A	A	B	B	B
S5_8842095_B	5	8842095	47.161	B	B	B	A	B	-	B	B	A	B	A	A	B	B	B	B	B	B	A	B	B	A	B	B	A	A	A	A	B	B	B	A	A	B	A	A	B	B	B	A	A	A	A	B	B	B
S5_9873649	5	9873649	48.203	B	B	B	A	B	-	-	B	A	B	A	A	B	B	B	B	B	B	A	-	B	A	B	B	A	A	A	A	B	B	B	A	A	B	A	A	B	B	B	A	A	A	A	B	B	B
S5_9977827	5	9977827	48.203	B	B	B	A	B	A	-	B	A	B	A	A	B	B	B	B	B	B	A	-	B	A	B	B	A	A	A	A	B	B	B	A	A	B	A	A	B	B	B	A	A	A	A	B	B	B
S5_9977828	5	9977828	48.203	B	B	B	A	B	A	-	B	A	B	A	A	B	B	B	B	B	B	A	-	B	A	B	B	A	A	A	A	B	B	B	A	A	B	A	A	B	B	B	A	A	A	A	B	B	B
S5_9977829	5	9977829	48.203	B	B	B	A	B	A	-	B	A	B	A	A	B	B	B	B	B	B	A	-	B	A	B	B	A	A	A	A	B	B	B	A	A	B	A	A	B	B	B	A	A	A	A	B	B	B
S5_9977830	5	9977830	48.203	B	B	B	A	B	A	-	B	A	B	A	A	B	B	B	B	B	B	A	-	B	A	B	B	A	A	A	A	B	B	B	A	A	B	A	A	B	B	B	A	A	A	A	B	B	B
S5_9977831	5	9977831	48.203	B	B	B	A	B	A	-	B	A	B	A	A	B	B	B	B	B	B	A	-	B	A	B	B	A	A	A	A	B	B	B	A	A	B	A	A	B	B	B	A	A	A	A	B	B	B
S5_10195573	5	10195573	48.203	B	B	B	A	B	-	-	B	A	B	A	A	B	B	B	B	B	B	A	A	B	A	B	B	A	A	A	A	B	B	B	A	A	B	A	A	B	B	B	A	A	A	A	B	B	B
S5_10195576	5	10195576	48.203	B	B	B	A	B	-	-	B	A	B	A	A	B	B	B	B	B	B	A	A	B	A	B	B	A	A	A	A	B	B	B	A	A	B	A	A	B	B	B	A	A	A	A	B	B	B
S5_10354468	5	10354468	48.203	B	B	B	A	B	-	-	B	A	B	A	A	B	B	B	B	B	B	A	A	B	A	B	B	A	A	A	A	B	B	B	A	A	B	A	A	B	B	B	A	A	A	A	B	B	B
S5_10485977	5	10485977	48.203	B	B	B	A	B	-	-	B	A	B	A	A	B	B	B	B	B	B	A	A	B	A	B	B	A	A	A	A	B	B	B	A	A	B	A	A	B	B	B	A	A	A	A	B	B	B
S5_10354436	5	10354436	49.224	B	B	B	A	B	B	A	B	A	B	A	A	B	B	B	B	B	B	A	A	B	A	B	B	A	A	A	A	B	B	B	A	A	B	A	A	B	B	B	A	A	A	A	B	B	B
S5_10619197	5	10619197	50.224	B	B	B	A	B	B	-	B	A	A	A	A	B	B	B	B	B	B	A	A	B	A	B	B	A	A	A	A	B	B	B	A	A	B	A	A	B	B	B	A	A	A	A	B	B	B
S5_10619203	5	10619203	50.224	B	B	B	A	B	B	-	B	A	A	A	A	B	B	B	B	B	B	A	A	B	A	B	B	A	A	A	A	B	B	B	A	A	B	A	A	B	B	B	A	A	A	A	B	B	B
S5_11058177	5	11058177	50.224	B	B	B	A	B	-	A	B	A	A	A	A	B	B	B	B	B	B	A	A	B	A	B	B	A	A	A	A	B	B	B	A	A	B	A	A	B	B	B	A	A	A	A	B	B	B
S5_10697870	5	10697870	50.714	B	B	B	A	B	B	B	B	A	A	A	A	B	B	B	B	B	B	A	A	B	A	B	B	A	A	A	-	B	B	B	A	A	B	A	A	B	B	B	A	A	A	A	B	B	B
S5_11114834	5	11114834	50.714	B	B	B	A	B	-	B	B	A	A	A	A	B	B	B	B	B	B	A	A	B	A	B	B	A	A	A	A	B	B	B	A	A	B	A	A	B	B	B	A	A	A	A	B	B	B
S5_11114869	5	11114869	50.714	B	B	B	A	B	-	B	B	A	A	A	A	B	B	B	B	B	B	A	A	B	A	B	B	A	A	A	A	B	B	B	A	A	B	A	A	B	B	B	A	A	A	A	B	B	B
S5_11114882	5	11114882	50.714	B	B	B	A	B	-	B	B	A	A	A	A	B	B	B	B	B	B	A	A	B	A	B	B	A	A	A	A	B	B	B	A	A	B	A	A	B	B	B	A	A	A	A	B	B	B
S5_10819819	5	10819819	51.219	B	B	B	A	B	-	-	B	A	-	A	A	B	B	B	B	B	B	A	A	B	A	B	B	A	A	A	-	B	B	B	A	A	B	A	A	B	B	B	A	A	A	A	B	B	B
S5_10819837	5	10819837	51.219	B	B	B	A	B	-	-	B	A	-	A	A	B	B	B	B	B	B	A	A	B	A	B	B	A	A	A	-	B	B	B	A	A	B	A	A	B	B	B	A	A	A	A	B	B	B
S5_10819843	5	10819843	51.219	B	B	B	A	B	-	-	B	A	-	A	A	B	B	B	B	B	B	A	A	B	A	B	B	A	A	A	-	B	B	B	A	A	B	A	A	B	B	B	A	A	A	A	B	B	B
S5_10819844	5	10819844	51.219	B	B	B	A	B	-	-	B	A	-	A	A	B	B	B	B	B	B	A	A	B	A	B	B	A	A	A	-	B	B	B	A	A	B	A	A	B	B	B	A	A	A	A	B	B	B
S5_10899805	5	10899805	51.74	B	B	B	A	B	-	B	B	A	-	A	A	B	B	B	B	B	B	A	A	B	A	B	B	A	A	A	A	B	B	B	A	A	B	A	A	B	B	B	A	A	A	A	B	B	B
S5_9987096	5	9987096	52.25	B	B	B	A	B	-	-	B	A	B	A	A	B	B	B	B	B	B	A	A	B	A	B	B	A	A	A	A	B	B	B	A	A	B	A	A	B	B	B	A	A	A	A	B	B	B
S5_10196399	5	10196399	52.25	B	B	B	A	B	B	-	B	A	B	A	A	B	B	B	B	B	B	A	-	B	A	B	B	A	A	A	A	B	B	B	A	A	B	A	A	B	B	B	A	A	A	A	B	B	B
S5_10354370	5	10354370	52.25	B	B	B	A	B	-	B	B	A	B	A	A	B	B	B	B	B	B	A	-	B	A	B	B	A	A	A	-	B	B	B	A	A	B	A	A	B	B	B	A	A	A	A	B	B	B
S5_10354374	5	10354374	52.25	B	B	B	A	B	-	B	B	A	B	A	A	B	B	B	B	B	B	A	-	B	A	B	B	A	A	A	-	B	B	B	A	A	B	A	A	B	B	B	A	A	A	A	B	B	B
S5_10354387	5	10354387	52.25	B	B	B	A	B	-	B	B	A	B	A	A	B	B	B	B	B	B	A	-	B	A	B	B	A	A	A	-	B	B	B	A	A	B	A	A	B	B	B	A	A	A	A	B	B	B
S5_10354388	5	10354388	52.25	B	B	B	A	B	-	B	B	A	B	A	A	B	B	B	B	B	B	A	-	B	A	B	B	A	A	A	-	B	B	B	A	A	B	A	A	B	B	B	A	A	A	A	B	B	B
S5_11029930	5	11029930	52.25	B	B	B	A	B	B	-	B	A	-	A	A	B	B	B	B	B	B	A	A	B	A	B	B	A	A	A	A	B	B	B	A	A	B	A	A	B	B	B	A	A	A	A	B	B	B
S5_11029971	5	11029971	52.25	B	B	B	A	B	B	-	B	A	-	A	A	B	B	B	B	B	B	A	A	B	A	B	B	A	A	A	A	B	B	B	A	A	B	A	A	B	B	B	A	A	A	A	B	B	B
S5_11114776	5	11114776	52.25	B	B	B	A	B	-	-	B	A	-	A	A	B	B	B	B	B	B	A	A	B	A	B	B	A	A	A	A	B	B	B	A	A	B	A	A	B	B	B	A	A	A	A	B	B	B
S5_11195296	5	11195296	52.25	B	B	B	A	B	B	A	B	A	-	A	A	B	B	B	B	B	B	A	-	B	A	B	B	A	A	A	A	B	B	B	A	A	B	A	A	B	B	B	A	A	A	A	B	B	B
S5_10818617_B	5	10818617	53.271	B	B	B	A	B	-	B	B	A	B	A	A	B	B	B	B	B	B	A	-	B	A	B	B	A	A	A	A	B	B	B	A	A	B	A	A	B	B	B	A	A	A	A	B	B	B
S5_10818673	5	10818673	53.271	B	B	B	A	B	-	B	B	A	B	A	A	B	B	B	B	B	B	A	-	B	A	B	B	A	A	A	A	B	B	B	A	A	B	A	A	B	B	B	A	A	A	A	B	B	B
S5_10818674_B	5	10818674	53.271	B	B	B	A	B	-	B	B	A	B	A	A	B	B	B	B	B	B	A	-	B	A	B	B	A	A	A	A	B	B	B	A	A	B	A	A	B	B	B	A	A	A	A	B	B	B
S5_10690060_B	5	10690060	54.786	B	B	B	A	B	-	B	B	A	B	A	A	B	B	B	B	B	B	A	-	B	A	B	B	A	A	A	A	B	B	B	A	A	B	A	A	B	B	B	A	A	A	A	B	B	B
S5_11055546_B	5	11055546	54.786	B	B	B	A	B	-	-	B	A	-	A	A	B	B	B	B	B	B	A	-	B	A	B	B	A	A	A	A	B	B	B	A	A	B	A	A	B	B	B	A	A	A	A	B	B	B
S5_11064448_B	5	11064448	54.786	B	B	B	A	B	-	-	B	A	-	A	A	B	B	B	B	B	B	A	A	B	A	B	B	A	A	A	A	B	B	B	A	A	B	A	A	B	B	B	A	A	A	A	B	B	B
S5_11064453_B	5	11064453	54.786	B	B	B	A	B	-	-	B	A	-	A	A	B	B	B	B	B	B	A	A	B	A	B	B	A	A	A	A	B	B	B	A	A	B	A	A	B	B	B	A	A	A	A	B	B	B
S5_11907848	5	11907848	56.893	B	B	B	A	B	B	A	B	A	-	A	A	B	B	B	B	B	B	A	A	B	A	B	B	A	A	A	B	B	B	B	A	A	B	A	A	B	B	B	A	A	A	A	B	B	B
S5_12143021	5	12143021	56.893	B	B	B	A	B	B	A	B	A	-	A	A	B	B	B	B	B	B	A	B	B	A	B	B	A	A	A	B	B	B	B	A	A	B	A	A	B	B	B	A	A	A	A	B	B	B
[truncated: 1,840 more rows]
[truncated: 62 more columns]
